# Supplementary material for: Asymmetric synthesis of spiro[benzofuran-pyrrolidine]-indolinedione via bifunctional urea catalyzed [3 + 2]-annulation
Source: Royal Society of Chemistry journal article supplement (doi:10.1039/d4ob01614a), 2024-12-03
Supplement: d4ob01614a1.pdf [file d4ob01614a1.pdf]

## Supporting Information

### Asymmetric Synthesis of spiro[benzofuran-pyrrolidine]-indolinedione *via* Bifunctional Urea Catalyzed [3+2]-annulation Reaction

Sankar Bharani,<sup>a</sup> Biddika Anandarao,<sup>a</sup> L. Raju Chowhan,<sup>b</sup> Pallepogu Raghavaiah,<sup>c</sup> and Madavi S. Prasad<sup>\*a</sup>

<sup>a</sup>*Asymmetric Synthesis and Catalysis Laboratory, Department of Chemistry, Central University of Tamil Nadu,  
Thiruvarur, 610 005, India*

[shivaprasad@cutn.ac.in](mailto:shivaprasad@cutn.ac.in) and [shivacutn@gmail.com](mailto:shivacutn@gmail.com)

<sup>b</sup>*School of Physical Sciences, Jawaharlal Nehru University, New Delhi, 110067, India*

<sup>c</sup>*Department of Chemistry, Central University of Karnataka, Kadaganchi, Kalaburagi- 585 367, India*

#### Table of Contents

---

|                                               |           |
|-----------------------------------------------|-----------|
| 1) General experimental procedures            | S2-S3     |
| 2) Characterization data for products         | S4-S21    |
| 3) Single Crystal X-ray data for compound 4d' | S22-S24   |
| 4) NMR spectral data for products             | S25-S171  |
| 5) HPLC data of compound 4a – 4h'             | S172-S200 |

## Experimental section:

### 1.1 General Experimental Procedures

*Nuclear Magnetic Resonance Spectroscopy:*  $^1\text{H}$  NMR spectra were acquired on Bruker AVIII400 (400 MHz) spectrometer and were referenced to TMS and residual non-deuterated solvent peak in  $\text{CDCl}_3$  ( $\delta = 7.26$ ). Chemical shifts ( $\delta\text{H}$  and  $\delta\text{C}$ ) are reported in parts per million (ppm), with signal splitting recorded as singlet (s), doublet (d), triplet (t), quartet (q), and multiplet and unresolved peaks (m). Coupling constants ( $J$ ) are mentioned in Hz and are presented as observed.  $^{13}\text{C}$  NMR spectra were obtained on Bruker AVIII400 (100 MHz) spectrometers and were referenced to solvent peaks in  $\text{CDCl}_3$  ( $\delta = 77.0$ ) and  $\text{DMSO-D}_6$  ( $\delta = 39.0$ ).

*Mass Spectrometry:* High-resolution mass spectra (HRMS) were recorded by the Thermo Fisher spectrometer using electrospray ionization ( $\text{ESI}^+$ ). The parent ion  $[\text{M}+\text{H}]^+$   $[\text{M}+\text{Na}]^+$  is calculated to 4 decimal places from the molecular formula, and all values are within a tolerance of 5 ppm.

*Specific rotations:* Optical rotations were recorded on an Anton Parr MCP100 polarimeter with a path length of 1 dm (using the sodium D line, 589 nm). Specific rotations ( $[\alpha]_D$ ) are reported in units of  $10^{-1} \text{ deg cm}^2 \text{ g}^{-1}$ . Concentrations are reported in g/100mL. Temperatures are reported in  $^\circ\text{C}$  (typically  $25^\circ\text{C}$ ).

*Infrared Spectroscopy:* Absorption spectra were obtained on a Shimadzu FT-IR spectrometer. Wavelengths of maximum absorbance ( $\nu_{\text{max}}$ ) are quoted in wavenumbers ( $\text{cm}^{-1}$ ). Only selected characteristic IR absorption data are provided for each compound.

### Materials:

Unless otherwise stated, all reactions were carried out in oven-dried glassware, using anhydrous reaction solvents. All other commercially available reagents and solvents were either used as received and/or dried and purified before use using standard procedures.

#### General Procedure A: Preparation of isatin-derived ketimines:

**1a-j'** was prepared by following the reported literature procedure.<sup>1</sup>

#### General Procedure B: Preparation of alkylidene 2-cumaranone enophiles:

**2a-2v** were synthesized using a literature report.<sup>2</sup> All the NMRs were consistent with the literature.

**General Procedure C: [3+2]-cycloaddition:**

To an oven-dried vial containing catalyst **3b** (2.5 mol%), the arylidene cumaranone enophile **2** (1.0 equiv.) was added followed by the addition of Ketimine **1** (1.1 equiv.) in DCM (0.5 mL). The crude reaction mixture was directly loaded into the column and purified by flash column chromatography using hexane/ EtOAc (7:3) to avoid racemisation.

**General Procedure D: Racemic reaction of [3+2]-cycloaddition:**

To an oven-dried vial containing catalyst DABCO (20 mol%), the arylidene cumaranone enophile **2** (1.0 equiv.) was added followed by the addition of Ketimine **1** (1.1 equiv.) in toluene (0.5 mL). After the completion of the reaction, monitored through TLC, the crude reaction mixture was directly loaded into the column and purified by flash column chromatography using hexane/ EtOAc (7:3). In the case of reactions where precipitation is observed, they are subjected to a centrifuge process followed by hexane wash resulting in the desired product.

**General Procedure E: synthetic application: *m*-CPBA oxidation: <sup>3</sup>**

To an oven-dried vial containing **4d** (1 equiv.), *m*-CPBA (2.1 equiv.) was added in DCM (0.1 M). The resulting mixture was stirred at RT for 72 hours; The reaction mixture was diluted with 5 mL of DCM, washed with 10% Na<sub>2</sub>SO<sub>4</sub> solution (2×5mL), saturated NaHCO<sub>3</sub> solution (2×5 mL), dried over Na<sub>2</sub>SO<sub>4</sub> and concentrated in vacuo. Then the crude product was directly purified by column chromatography using hexane/ EtOAc (3:1) as a mobile phase.

**General Procedure F: synthetic application: <sup>4</sup>**

To an oven-dried vial containing **4i'** (1 equiv.), 4-acetamidobenzenesulfonyl azide (1.0 equiv.) CuI (5 mol%) and NEt<sub>3</sub> (6 mol%) was added in EtOH (0.1 M) under N<sub>2</sub>. The resulting mixture was stirred at 70°C for 3 hours; The reaction mixture was diluted with 5 mL of DCM, washed with saturated NaHCO<sub>3</sub> solution (2×5 mL), dried over Na<sub>2</sub>SO<sub>4</sub> and concentrated in vacuo. Then the crude product was directly purified by column chromatography using DCM with 1% NEt<sub>3</sub> as a mobile phase.

**References:**

- 1) X. Wang, D. Huang, K. H. Wang, J. Liu, W. Zong, J. Wang, J. Su, and Y. Hu, *Appl Organometal Chem.* 2019, **33**, 4995.
- 2) H. J. Ma, K. Gao, X. L. Wag, J. Y. Zeng, Y. Yang, and Y. Jiang, *Org. Biomol. Chem.*, 2023,**21**, 6312-6316
- 3) W. C. Yuan, L. Yang, J. Q. Zhao, H. Y. Du, Z. H. Wang, Y. You, Y. P. Zhang, J. Li, W. Zhang, and M. Q. Zhou, *Org. Lett.* 2022, **24**, 25, 4603–4608.
- 4) P. Shanmugam, M. Damodiran, K. Selvakumar, and P. T. Perumal, *J. Heterocyclic Chem.*, 2009, **46**, 919-924.

**(2'R,3R,4'S,5'S)-4'-(4-bromophenyl)-1''-methyl-5'-(trifluoromethyl)-2H-dispiro[benzofuran-3,3'-pyrrolidine-2',3''-indoline]-2,2''-dione (4a):**

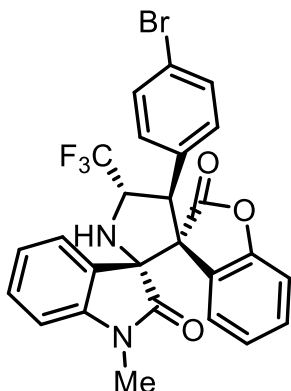

Prepared by following general procedure **C** purified by column chromatography using hexane - Ethyl acetate and isolated product **4a** in 89% yield as a white solid with M. P. 239 - 241 °C; The enantiomeric ratio (*er*) was determined by chiral stationary phase HPLC using a DAICEL IA column (hexane/EtOAc = 80:20, flow rate 1.0 mL/min,  $\lambda$  = 254 nm),  $t_R$  = 9.303 min (minor),  $t_R$  = 24.131 min (major),  $[\alpha]_D^{25}$  = -82.273 ( $\text{CH}_2\text{Cl}_2$ ,  $c$  = 0.9 g/100mL,  $\text{CH}_2\text{Cl}_2$  for 90:10 *er*); IR (neat)  $\nu_{\text{max}}$  3329, 1797, 1720, 1122, and 752  $\text{cm}^{-1}$ ;  $^1\text{H}$  NMR (400 MHz,  $\text{CDCl}_3$ )  $\delta$  7.78 (1H, dd,  $J$  = 7.6, 1.5 Hz), 7.33 (1H, td,  $J$  = 7.6, 1.2 Hz), 7.28 (1H, td,  $J$  = 7.8, 1.5 Hz), 7.24 – 7.20 (2H, m),

7.17 (1H, td,  $J$  = 7.7, 1.2 Hz), 6.93 (2H, d,  $J$  = 8.5 Hz), 6.76 (1H, dd,  $J$  = 8.0, 0.8 Hz), 6.74 (1H, dd,  $J$  = 7.6, 0.8 Hz), 6.70 (1H, d,  $J$  = 7.7 Hz), 6.65 (1H, td,  $J$  = 7.6, 0.9 Hz), 5.57 (1H, d,  $J$  = 10.7 Hz), 4.86 – 4.47 (1H, m), 3.21 (3H, s), 2.85 (1H, d,  $J$  = 5.6 Hz);  $^{13}\text{C}$  NMR (100 MHz,  $\text{CDCl}_3$ , DEPT-135)  $\delta$  176.0 (C, C=O), 171.9 (C, N-C=O), 152.9 (C), 144.2 (C), 131.5 (2CH), 131.2 (C), 130.6 (CH), 130.6 (CH), 130.1 (2CH), 126.4 (CH), 125.4 (CF<sub>3</sub>, q,  $J$  = 279 Hz), 125.3 (CH), 123.8 (C), 123.6 (CH), 123.4 (C), 122.4 (C), 121.9 (CH), 111.7 (CH), 108.3 (CH), 71.5 (C), 65.9 (C), 60.9 (CH, q,  $J$  = 31 Hz), 50.1 (CH), 26.5 (CH<sub>3</sub>);  $^{19}\text{F}$  NMR (376MHz,  $\text{CDCl}_3$ )  $\delta$  -71.60; HRMS (ESI)  $m/z$ : 565.0345 [ $\text{M} + \text{Na}$ ]<sup>+</sup>, calcd for C<sub>26</sub>H<sub>18</sub>O<sub>3</sub>N<sub>2</sub>F<sub>3</sub>BrNa; Found 565.03316.

**(2'R,3R,4'S,5'S)-1''-methyl-4'-phenyl-5'-(trifluoromethyl)-2H-dispiro[benzofuran-3,3'-pyrrolidine-2',3''-indoline]-2,2''-dione (4b):**

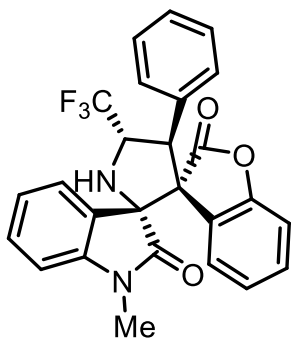

Prepared by following general procedure **C** purified by column chromatography using hexane - Ethyl acetate and isolated product **4b** in 83% yield as a white solid with M. P. 250 - 252 °C; The enantiomeric ratio (*er*) was determined by chiral stationary phase HPLC using a DAICEL IA column (hexane/EtOAc = 80:20, flow rate 1.0 mL/min,  $\lambda$  = 254 nm),  $t_R$  = 7.935 min (minor),  $t_R$  = 16.749 min (major),  $[\alpha]_D^{25}$  = -4.000 ( $\text{CH}_2\text{Cl}_2$ ,  $c$  = 0.1 g/100mL,  $\text{CH}_2\text{Cl}_2$  for 79:21 *er*); IR (neat)  $\nu_{\text{max}}$  3340, 1793, 1720, 1462, and 752  $\text{cm}^{-1}$ ;  $^1\text{H}$  NMR (400 MHz,  $\text{CDCl}_3$ )  $\delta$  7.81 (1H, d,  $J$  = 7.0 Hz), 7.31 (1H, t,  $J$  = 7.6 Hz), 7.24 (1H, td,  $J$  = 7.7, 1.0 Hz), 7.16 (1H, td,  $J$  = 7.6, 0.8 Hz), 7.12 – 7.05 (5H, m), 6.76 (1H, d,  $J$  = 7.3 Hz), 6.70 (2H, t,  $J$  = 7.2 Hz), 6.64 (1H, t,  $J$  = 7.6 Hz), 5.60 (1H, d,  $J$  = 10.7 Hz), 4.94 – 4.85 (1H, m), 3.22 (3H, s), 2.86 (1H, d,  $J$  = 5 Hz);  $^{13}\text{C}$  NMR (100 MHz,  $\text{CDCl}_3$ , DEPT-135)  $\delta$  176.1 (C, C=O), 172.1 (C, N-C=O), 152.8 (C), 144.2 (C), 132.0 (C), 130.5 (CH), 130.3 (CH), 128.4 (2CH), 128.3 (2CH), 128.1 (CH), 126.5 (CH), 125.5 (CF<sub>3</sub>, q,  $J$  = 279 Hz), 125.4 (CH), 123.9 (C), 123.8 (C), 123.5 (CH), 121.9 (CH), 111.4 (CH), 108.3 (CH), 71.5 (C), 66.3 (C), 60.8 (CH, q,  $J$  = 32 Hz), 50.7 (CH), 26.5 (CH<sub>3</sub>);  $^{19}\text{F}$  NMR (376MHz,  $\text{CDCl}_3$ )  $\delta$  -71.53; HRMS (ESI)  $m/z$ : 487.1240 [ $\text{M} + \text{Na}$ ]<sup>+</sup>, calcd for C<sub>26</sub>H<sub>19</sub>O<sub>3</sub>N<sub>2</sub>F<sub>3</sub>Na; Found 487.1235.



**(2'R,3R,4'S,5'S)-4'-(4-fluorophenyl)-1''-methyl-5'-(trifluoromethyl)-2H-dispiro[benzofuran-3,3'-pyrrolidine-2',3''-indoline]-2,2''-dione (4c):**

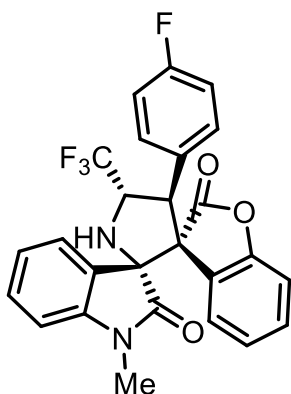

Prepared by following general procedure **C** purified by column chromatography using hexane - Ethyl acetate and isolated product **4c** in 86% yield as a white solid with M. P. 247 - 249 °C; The enantiomeric ratio (*er*) was determined by chiral stationary phase HPLC using a DAICEL IA column (hexane/EtOAc = 80:20, flow rate 0.5 mL/min,  $\lambda$  = 254 nm),  $t_R$  = 17.268 min (minor),  $t_R$  = 38.553 min (major),  $[\alpha]_D^{25}$  = -81.633 ( $\text{CH}_2\text{Cl}_2$ ,  $c$  = 0.5 g/100mL,  $\text{CH}_2\text{Cl}_2$  for 91:9 *er*); IR (neat)  $\nu_{\text{max}}$  3344, 1793, 1724, 1172, and 752  $\text{cm}^{-1}$ ;  $^1\text{H}$  NMR (400 MHz,  $\text{CDCl}_3$ )  $\delta$  7.80 (1H, d,  $J$  = 7.3 Hz), 7.33 (1H, t,  $J$  = 7.4 Hz), 7.27 (1H, t,  $J$  = 7.2 Hz), 7.17 (1H, t,  $J$  = 7.6 Hz), 7.03 (2H, q,  $J$  = 3.2 Hz), 6.80 – 6.74 (4H, m), 6.70 (1H, d,  $J$  = 7.8 Hz), 6.65 (1H, t,  $J$  = 7.6 Hz), 5.59 (1H, d,  $J$  = 10.7 Hz), 4.86 – 4.78 (1H, m), 3.21 (3H, s), 2.86 (1H, d,  $J$  = 5 Hz);  $^{13}\text{C}$  NMR (100 MHz,  $\text{CDCl}_3$ , DEPT-135)  $\delta$  176.1 (C, C=O), 171.9 (C, N-C=O), 162.4 (C, C-F, d,  $J$  = 246 Hz), 152.9 (C), 144.2 (C), 130.6 (CH), 130.5 (CH), 130.1 (CH), 130.0 (CH), 127.8 (C, d,  $J$  = 3Hz), 126.4 (CH), 125.4 (CF<sub>3</sub>, q,  $J$  = 279 Hz), 125.4 (CH), 123.9 (C), 123.6 (CH), 123.5 (CH), 121.9 (CH), 115.4 (CH), 115.2 (CH), 111.6 (CH), 108.3 (CH), 71.4 (C), 66.1 (C), 61.2 (CH, q,  $J$  = 31 Hz), 50.3 (CH), 26.5 (CH<sub>3</sub>);  $^{19}\text{F}$  NMR (376MHz,  $\text{CDCl}_3$ )  $\delta$  -71.55, -113.6; HRMS (ESI)  $m/z$ : 505.1146  $[\text{M} + \text{Na}]^+$ , calcd for  $\text{C}_{26}\text{H}_{18}\text{O}_3\text{N}_2\text{F}_4\text{Na}$ ; Found 505.1138.

**(2'R,3R,4'R,5'S)-4'-(2-chlorophenyl)-1''-methyl-5'-(trifluoromethyl)-2H-dispiro[benzofuran-3,3'-pyrrolidine-2',3''-indoline]-2,2''-dione(4d):**

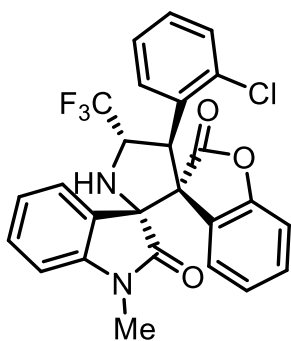

Prepared by following general procedure **C** purified by column chromatography using hexane - Ethyl acetate and isolated product **4d** in 88% yield as a white solid with M. P. 254 - 256 °C; The enantiomeric ratio (*er*) was determined by chiral stationary phase HPLC using a DAICEL IA column (hexane/EtOAc = 70:30, flow rate 0.5 mL/min,  $\lambda$  = 254 nm),  $t_R$  = 12.372 min (minor),  $t_R$  = 42.681 min (major),  $[\alpha]_D^{25}$  = -37.333 ( $\text{CH}_2\text{Cl}_2$ ,  $c$  = 0.6 g/100mL,  $\text{CH}_2\text{Cl}_2$  for 98:2 *er*); IR (neat)  $\nu_{\text{max}}$  3332, 1797, 1724, 1126, and 752  $\text{cm}^{-1}$ ;  $^1\text{H}$  NMR (400 MHz,  $\text{DMSO}-d_6$ )  $\delta$  8.33 (1H, d,  $J$  = 7.4 Hz), 7.43 (1H, t,  $J$  = 7.5 Hz), 7.31 (2H, t,  $J$  = 7.5 Hz), 7.21 (1H, t,  $J$  = 7.8 Hz), 7.13 (2H, q,  $J$  = 7.8 Hz), 6.95 – 6.90 (4H, m), 6.69 (1H, t,  $J$  = 7.7 Hz), 6.39 (1H, d,  $J$  = 10.8 Hz), 5.15 (1H, d,  $J$  = 8.6 Hz), 4.94 – 4.88 (1H, m), 3.11 (3H, s);  $^{13}\text{C}$  NMR (100 MHz,  $\text{DMSO}-d_6$ , DEPT-135)  $\delta$  175.4 (C, C=O), 171.6 (C, N-C=O), 152.4 (C), 144.5 (C), 134.7 (C), 131.1 (CH), 130.9 (CH), 130.7 (C), 130.6 (CH), 130.1 (CH), 130.0 (CH), 128.5 (CH), 126.7 (CH), 126.6 (CF<sub>3</sub>, q,  $J$  = 279 Hz), 126.4 (CH), 124.3 (CH), 123.4 (C), 123.3 (C), 121.6 (CH), 111.3 (CH), 108.8 (CH), 72.1 (C), 65.6 (C), 62.0 (CH, q,  $J$  = 30 Hz), 45.9 (CH), 26.5 (CH<sub>3</sub>);  $^{19}\text{F}$  NMR (376MHz,  $\text{DMSO}-d_6$ )  $\delta$  -70.62; HRMS (ESI)  $m/z$ : 521.0850  $[\text{M} + \text{Na}]^+$ , calcd for  $\text{C}_{26}\text{H}_{18}\text{O}_3\text{N}_2\text{F}_3\text{ClNa}$ ; Found 521.0846.

**(2'R,3R,4'S,5'S)-4'-(3-chlorophenyl)-1''-methyl-5'-(trifluoromethyl)-2H-dispiro[benzofuran-3,3'-pyrrolidine-2',3''-indoline]-2,2''-dione (4e):**

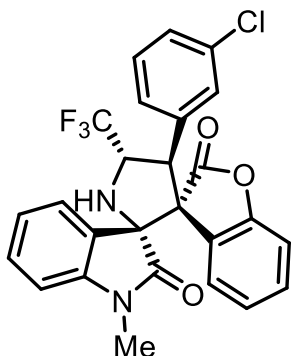

Prepared by following general procedure **C** purified by column chromatography using hexane - Ethyl acetate and isolated product **4e** in 67% yield as a white solid with M. P. 249 - 251 °C; The enantiomeric ratio (*er*) was determined by chiral stationary phase HPLC using a DAICEL IA column (hexane/EtOAc = 80:20, flow rate 0.5 mL/min,  $\lambda$  = 254 nm),  $t_R$  = 15.886 min (minor),  $t_R$  = 38.616 min (major),  $[\alpha]_D^{25}$  = -98.200 (CH<sub>2</sub>Cl<sub>2</sub>, *c* = 0.5 g/100mL, CH<sub>2</sub>Cl<sub>2</sub> for 80:20 *er*); IR (neat)  $\nu_{\max}$  3332, 1797, 1705, 1080, and 752 cm<sup>-1</sup>; <sup>1</sup>H NMR (400 MHz, DMSO-*D*<sub>6</sub>)  $\delta$  8.20 (1H, d, *J* = 7.5 Hz), 7.39 (1H, td, *J* = 7.5, 0.8 Hz), 7.32 (1H, td, *J* = 7.7, 1.0 Hz), 7.22 – 7.15 (3H, m), 7.13 (1H, br s), 7.07 (1H, d, *J* = 7.2 Hz), 6.89 (2H, t, *J* = 7.8 Hz), 6.76 (1H, d, *J* = 7.3 Hz), 6.65 (1H, d, *J* = 7.5 Hz), 5.41 (1H, d, *J* = 10.0 Hz), 5.16 (2H, s), 3.10 (3H, s); <sup>13</sup>C NMR (100 MHz, DMSO-*D*<sub>6</sub>, DEPT-135)  $\delta$  175.3 (C, C-C=O), 172.5 (C, N-C=O), 152.1 (C), 144.2 (C), 135.7 (C), 133.3 (C), 131.0 (CH), 130.9 (CH), 130.6 (CH), 128.6 (CH), 128.5 (CH), 127.9 (CH), 127.7 (CH), 126.2 (CH), 124.4 (CH), 123.8 (CF<sub>3</sub>, q, *J* = 279 Hz), 123.3 (C), 123.2 (C), 121.7 (CH), 111.1 (CH), 108.8 (CH), 72.3 (C), 66.6 (C), 60.1 (CH, q, *J* = 30 Hz), 50.6 (CH), 26.5 (CH<sub>3</sub>); <sup>19</sup>F NMR (376MHz, DMSO-*D*<sub>6</sub>)  $\delta$  -70.54; HRMS (ESI) *m/z*: 521.0850 [M + Na]<sup>+</sup>, calcd for C<sub>26</sub>H<sub>18</sub>O<sub>3</sub>N<sub>2</sub>F<sub>3</sub>ClNa; Found 521.0832.

**(2'R,3R,4'S,5'S)-4'-(4-chlorophenyl)-1''-methyl-5'-(trifluoromethyl)-2H-dispiro[benzofuran-3,3'-pyrrolidine-2',3''-indoline]-2,2''-dione (4f):**

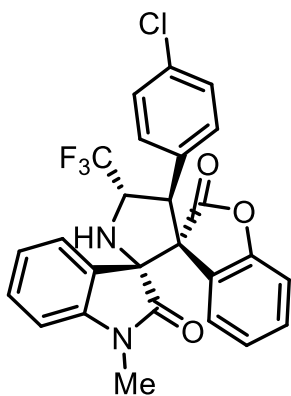

Prepared by following general procedure **C** purified by column chromatography using hexane - Ethyl acetate and isolated product **4f** in 96% yield as a white solid with M. P. 252 - 254 °C; The enantiomeric ratio (*er*) was determined by chiral stationary phase HPLC using a DAICEL IC column (hexane/EtOAc = 95:5, flow rate 1.0 mL/min,  $\lambda$  = 254 nm),  $t_R$  = 33.715 min (major),  $t_R$  = 36.913 min (major),  $[\alpha]_D^{25}$  = -41.633 (CH<sub>2</sub>Cl<sub>2</sub>, *c* = 0.5 g/100mL, CH<sub>2</sub>Cl<sub>2</sub> for 75:25 *er*); IR (neat)  $\nu_{\max}$  3352, 1801, 1720, 1141, and 752 cm<sup>-1</sup>; <sup>1</sup>H NMR (400 MHz, DMSO-*D*<sub>6</sub>)  $\delta$  8.18 (1H, d, *J* = 7.2 Hz), 7.38 – 7.22 (2H, m), 7.21 – 7.19 (3H, m), 7.12 (2H, d, *J* = 8.4 Hz), 6.90 (2H, m), 6.75 (1H, d, *J* = 7.6 Hz), 6.65 (1H, t, *J* = 7.6 Hz), 5.41 (1H, d, *J* = 10.4 Hz), 5.15 – 5.08 (2H, m), 3.10 (3H, s); <sup>13</sup>C NMR (100 MHz, DMSO-*D*<sub>6</sub>, DEPT-135)  $\delta$  175.3 (C, C-C=O), 172.5 (C, N-C=O), 152.1 (C, d, *J* = 2 Hz), 144.2 (C), 133.1 (C), 132.2 (C), 130.9 (CH), 130.9 (CH), 130.6 (2CH), 128.7 (2CH), 127.9 (CH), 126.6 (CF<sub>3</sub>, q, *J* = 279 Hz), 126.1 (CH), 124.4 (CH), 123.3 (C), 123.2 (C), 121.7 (CH), 111.1 (CH), 108.8 (CH), 72.3 (C), 66.6 (C), 60.2 (CH, q, *J* = 34 Hz), 50.4 (CH), 26.5 (CH<sub>3</sub>); <sup>19</sup>F NMR (376MHz, DMSO-*D*<sub>6</sub>)  $\delta$  -70.51; HRMS (ESI) *m/z*: 521.0850 [M + Na]<sup>+</sup>, calcd for C<sub>26</sub>H<sub>18</sub>O<sub>3</sub>N<sub>2</sub>F<sub>3</sub>ClNa; Found 521.0832.

**(2'R,3R,4'R,5'S)-4'-(2-bromophenyl)-1''-methyl-5'-(trifluoromethyl)-2H-dispiro[benzofuran-3,3'-pyrrolidine-2',3''-indoline]-2,2''-dione (4g):**

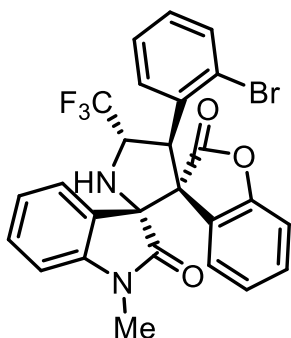

Prepared by following general procedure **C** purified by column chromatography using hexane - Ethyl acetate and isolated product **4g** in 92% yield as a white solid with M. P. 263 - 265 °C;  $[\alpha]_D^{25} = -38.888$  ( $\text{CH}_2\text{Cl}_2$ ,  $c = 0.6 \text{ g/100mL}$ ); IR (neat)  $\nu_{\text{max}}$  3332, 1797, 1720, 1076, and 752  $\text{cm}^{-1}$ ;  $^1\text{H}$  NMR (400 MHz,  $\text{DMSO}-d_6$ )  $\delta$  8.35 (1H, d,  $J = 7.5$  Hz), 7.54 (1H, d,  $J = 7.6$  Hz), 7.45 (1H, t,  $J = 7.5$  Hz), 7.37 (1H, t,  $J = 7.8$  Hz), 7.21 (1H, t,  $J = 7.7$  Hz), 7.07 – 7.04 (2H, m), 6.97 – 6.89 (4H, m), 6.68 (1H, t,  $J = 7.6$  Hz), 6.39 (1H, d,  $J = 10.8$  Hz), 5.14 (1H, d,  $J = 8.6$  Hz), 4.91 – 4.81 (1H, m), 3.11 (3H, s);

$^{13}\text{C}$  NMR (100 MHz,  $\text{DMSO}-d_6$ , DEPT-135)  $\delta$  175.3 (C, C-C=O), 171.6 (C, N-C=O), 152.5 (C), 144.5 (C), 133.7 (CH), 132.4 (C), 131.2 (CH), 130.9 (CH), 130.7 (CH), 130.4 (CH), 128.6 (CH), 127.2 (CH), 126.5 (CF<sub>3</sub>, q,  $J = 279$  Hz), 126.4 (CH), 125.8 (C), 124.3 (CH), 123.4 (C), 123.2 (C), 121.6 (CH), 111.3 (CH), 108.7 (CH), 72.1 (C), 65.7 (C), 62.4 (CH, q,  $J = 30$  Hz), 48.5 (CH), 26.5 (CH<sub>3</sub>);  $^{19}\text{F}$  NMR (376MHz,  $\text{DMSO}-d_6$ )  $\delta$  -70.53; HRMS (ESI)  $m/z$ : 565.0345  $[\text{M} + \text{Na}]^+$ , calcd for  $\text{C}_{26}\text{H}_{18}\text{O}_3\text{N}_2\text{F}_3\text{BrNa}$ ; Found 565.0339.

**(2'R,3R,4'S,5'S)-4'-(3-bromophenyl)-1''-methyl-5'-(trifluoromethyl)-2H-dispiro[benzofuran-3,3'-pyrrolidine-2',3''-indoline]-2,2''-dione (4h):**

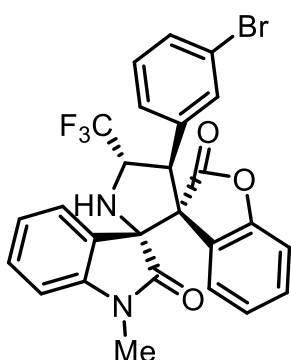

Prepared by following general procedure **C** purified by column chromatography using hexane - Ethyl acetate and isolated product **4h** in 83% yield as a white solid with M. P. 251 - 253 °C; The enantiomeric ratio (*er*) was determined by chiral stationary phase HPLC using a DAICEL IA column (hexane/EtOAc = 80:20, flow rate 0.5 mL/min,  $\lambda = 254$  nm),  $t_R = 16.487$  min (minor),  $t_R = 42.577$  min (major),  $[\alpha]_D^{25} = -52.383$  ( $\text{CH}_2\text{Cl}_2$ ,  $c = 1.3 \text{ g/100mL}$ ,  $\text{CH}_2\text{Cl}_2$  for 81:19 *er*); IR (neat)  $\nu_{\text{max}}$  3317, 1793, 1716, 1122, and 752  $\text{cm}^{-1}$ ;  $^1\text{H}$  NMR (400 MHz,  $\text{DMSO}-d_6$ )  $\delta$  8.20 (1H, d,  $J = 6.9$  Hz), 7.39 (1H, td,  $J = 7.6, 0.9$  Hz), 7.35 – 7.30 (2H, m), 7.24 (1H, br s), 7.21 (1H, td,  $J = 7.8, 1.0$  Hz), 7.11 (2H, d,  $J = 5.1$  Hz), 6.90 (2H, t,  $J = 7.6$  Hz), 6.75 (1H, d,  $J = 6.9$  Hz), 6.65 (1H, td,  $J = 7.5, 0.7$  Hz), 5.39 (1H, d,  $J = 10.2$  Hz), 5.14 (2H, s), 3.10 (3H, s);  $^{13}\text{C}$  NMR (100 MHz,  $\text{DMSO}-d_6$ , DEPT-135)  $\delta$  175.3 (C, C-C=O), 172.5 (C, N-C=O), 152.1 (C), 144.2 (C), 135.8 (C), 131.5 (CH), 131.3 (CH), 131.0 (CH), 130.9 (CH), 130.8 (CH), 128.0 (CH), 127.9 (CH), 126.2 (CH), 124.4 (CH), 123.9 (CF<sub>3</sub>, q,  $J = 243$  Hz), 123.2 (C), 123.2 (C), 121.9 (C), 121.7 (CH), 111.2 (CH), 108.8 (CH), 72.3 (C), 66.6 (C), 60.1 (CH, q,  $J = 30$  Hz), 50.6 (CH), 26.5 (CH<sub>3</sub>);  $^{19}\text{F}$  NMR (376MHz,  $\text{DMSO}-d_6$ )  $\delta$  -70.53; HRMS (ESI)  $m/z$ : 565.0345  $[\text{M} + \text{Na}]^+$ , calcd for  $\text{C}_{26}\text{H}_{18}\text{O}_3\text{N}_2\text{F}_3\text{BrNa}$ ; Found 565.0335.

**(2'R,3R,4'S,5'S)-1''-methyl-4'-(p-tolyl)-5'-(trifluoromethyl)-2H-dispiro[benzofuran-3,3'-pyrrolidine-2',3''-indoline]-2,2''-dione (4i):**

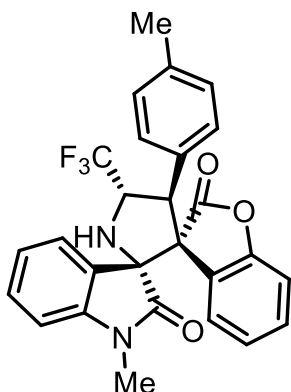

Prepared by following general procedure **C** purified by column chromatography using hexane - Ethyl acetate and isolated product **4i** in 81% yield as a white solid with M. P. 258 - 260 °C; The enantiomeric ratio (*er*) was determined by chiral stationary phase HPLC using a DAICEL IA column (hexane/EtOAc = 80:20, flow rate 0.5 mL/min,  $\lambda$  = 254 nm),  $t_R$  = 17.072 min (minor),  $t_R$  = 44.914 min (major),  $[\alpha]_D^{25}$  = -82.712 ( $\text{CH}_2\text{Cl}_2$ ,  $c$  = 0.9 g/100mL,  $\text{CH}_2\text{Cl}_2$  for 85:15 *er*); IR (neat)  $\nu_{\text{max}}$  3325, 1789, 1716, 1083, and 752  $\text{cm}^{-1}$ ;  $^1\text{H}$  NMR (400 MHz,  $\text{DMSO}-d_6$ )  $\delta$  8.24 (1H, d,  $J$  = 7.4 Hz), 7.41 (1H, t,  $J$  = 7.3 Hz), 7.34 (1H, td,  $J$  = 7.9, 0.8 Hz), 7.25 (1H, td,  $J$  = 7.7, 0.8 Hz), 7.02 – 6.94 (5H, m), 6.90 (1H, d,  $J$  = 7.8 Hz), 6.81 (1H, d,  $J$  = 9.5 Hz), 6.69 (1H, t,  $J$  = 7.6 Hz), 5.44 (1H, d,  $J$  = 10 Hz), 5.13 – 5.06 (2H, m), 3.14 (3H, s), 2.18 (3H, s);  $^{13}\text{C}$  NMR (100 MHz,  $\text{DMSO}-d_6$ , DEPT-135)  $\delta$  175.4 (C, C-C=O), 172.7 (C, N-C=O), 152.2 (C), 144.2 (C), 137.6 (C), 130.8 (CH), 130.7 (CH), 130.0 (C), 129.3 (2CH), 128.7 (2CH), 127.9 (CH), 126.7 (CF<sub>3</sub>, q,  $J$  = 279 Hz), 126.1 (CH), 124.3 (CH), 123.7 (C), 123.5 (C), 121.6 (CH), 111.0 (CH), 108.8 (CH), 72.3 (C), 66.7 (C), 60.4 (CH, q,  $J$  = 30 Hz), 50.7 (CH), 26.5 (CH<sub>3</sub>), 20.9 (CH<sub>3</sub>);  $^{19}\text{F}$  NMR (376MHz,  $\text{DMSO}-d_6$ )  $\delta$  -70.38; HRMS (ESI)  $m/z$ : 501.1396  $[\text{M} + \text{Na}]^+$ , calcd for  $\text{C}_{27}\text{H}_{21}\text{O}_3\text{N}_2\text{F}_3\text{Na}$ ; Found 501.1389.

**(2'R,3R,4'S,5'S)-4'-(3-methoxyphenyl)-1''-methyl-5'-(trifluoromethyl)-2H-dispiro[benzofuran-3,3'-pyrrolidine-2',3''-indoline]-2,2''-dione (4j):**

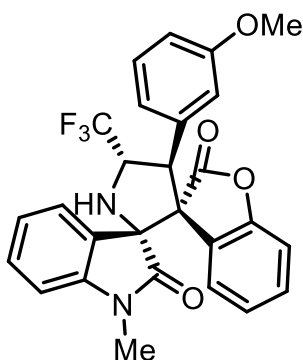

Prepared by following general procedure **C** purified by column chromatography using hexane - Ethyl acetate and isolated product **4j** in 93% yield as a white solid with M. P. 249 - 251 °C; The enantiomeric ratio (*er*) was determined by chiral stationary phase HPLC using a DAICEL IA column (hexane/EtOAc = 80:20, flow rate 0.5 mL/min,  $\lambda$  = 254 nm),  $t_R$  = 19.397 min (minor),  $t_R$  = 49.566 min (major),  $[\alpha]_D^{25}$  = -82.211 ( $\text{CH}_2\text{Cl}_2$ ,  $c$  = 1.0 g/100mL,  $\text{CH}_2\text{Cl}_2$  for 92:8 *er*); IR (neat)  $\nu_{\text{max}}$  3325, 1797, 1716, 1141, and 752  $\text{cm}^{-1}$ ;  $^1\text{H}$  NMR (400 MHz,  $\text{DMSO}-d_6$ )  $\delta$  8.19 (1H, d,  $J$  = 7.2 Hz), 7.37 (1H, t,  $J$  = 7.6 Hz), 7.29 (1H, td,  $J$  = 7.6, 0.8 Hz), 7.19 (1H, td,  $J$  = 7.7, 0.9 Hz), 7.04 (1H, t,  $J$  = 7.9 Hz), 6.87 (2H, dd,  $J$  = 13.3, 7.8 Hz), 6.75 (1H, d,  $J$  = 7.2 Hz), 6.69 – 6.62 (3H, m), 6.56 (1H, br s), 5.38 (1H, d,  $J$  = 10.2 Hz), 5.10 – 5.03 (2H, s), 3.56 (3H, s), 3.09 (3H, s);  $^{13}\text{C}$  NMR (100 MHz,  $\text{DMSO}-d_6$ , DEPT-135)  $\delta$  175.4 (C, C-C=O), 172.7 (C, N-C=O), 159.2 (C), 152.2 (C), 144.3 (C), 134.7 (C), 130.9 (CH), 130.8 (CH), 129.8 (CH), 128.0 (CH), 126.1 (CH), 124.3 (CH), 123.8 (CF<sub>3</sub>, q,  $J$  = 279 Hz), 123.7 (C), 123.5 (C), 121.6 (CH), 121.2 (CH), 114.4 (CH), 113.8 (CH), 111.1 (CH), 108.8 (CH), 72.3 (C), 66.7 (C), 60.3 (CH, q,  $J$  = 30 Hz), 55.4 (CH<sub>3</sub>), 50.9 (CH), 26.5 (CH<sub>3</sub>);  $^{19}\text{F}$  NMR (376MHz,  $\text{DMSO}-d_6$ )  $\delta$  -70.44; HRMS (ESI)  $m/z$ : 517.1346  $[\text{M} + \text{Na}]^+$ , calcd for  $\text{C}_{27}\text{H}_{21}\text{O}_4\text{N}_2\text{F}_3\text{Na}$ ; Found 517.1341.

**(2'R,3R,4'S,5'S)-4'-(4-methoxyphenyl)-1''-methyl-5'-(trifluoromethyl)-2H-dispiro[benzofuran-3,3'-pyrrolidine-2',3''-indoline]-2,2''-dione (4k):**

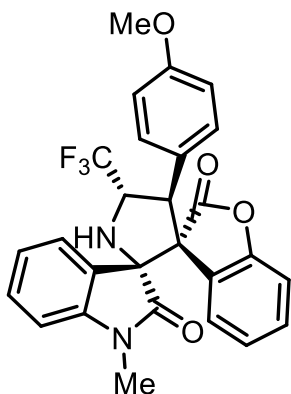

Prepared by following general procedure **C** purified by column chromatography using hexane - Ethyl acetate and isolated product **4k** in 73% yield as a white solid with M. P. 229 - 221 °C; The enantiomeric ratio (*er*) was determined by chiral stationary phase HPLC using a DAICEL IA column (hexane/EtOAc = 80:20, flow rate 0.5 mL/min,  $\lambda$  = 254 nm),  $t_R$  = 21.427 min (minor),  $t_R$  = 56.208 min (major),  $[\alpha]_D^{25}$  = -28.407 ( $\text{CH}_2\text{Cl}_2$ ,  $c$  = 0.6 g/100mL,  $\text{CH}_2\text{Cl}_2$  for 71:29 *er*); IR (neat)  $\nu_{\text{max}}$  3753, 2364, 1801, 1720, and 752  $\text{cm}^{-1}$ ;  $^1\text{H}$  NMR (400 MHz,  $\text{DMSO}-d_6$ )  $\delta$  8.17 (1H, d,  $J$  = 7.1 Hz), 7.35 (1H, td,  $J$  = 7.6, 0.8 Hz), 7.28 (1H, td,  $J$  = 7.9, 1.1 Hz), 7.18 (1H, td,  $J$  = 7.7, 1.0 Hz), 6.97 (2H, d,  $J$  = 8.8 Hz), 6.86 (2H, dd,  $J$  = 12.7, 7.8 Hz), 6.75 (1H, d,  $J$  = 7.1 Hz), 6.66 – 6.61 (3H, m), 5.35 (1H, d,  $J$  = 10.3 Hz), 5.04 – 4.95 (2H, m), 3.60 (3H, s), 3.07 (3H, s);  $^{13}\text{C}$  NMR (100 MHz,  $\text{DMSO}-d_6$ , DEPT-135)  $\delta$  175.5 (C, C-C=O), 172.7 (C, N-C=O), 159.1 (C), 152.2 (C), 144.2 (C), 130.8 (CH), 130.7 (CH), 129.9 (2CH), 127.9 (CH), 126.7 (CF<sub>3</sub>, q,  $J$  = 279 Hz), 126.1 (CH), 124.8 (C), 124.3 (CH), 123.7 (C), 123.6 (C), 121.6 (CH), 114.0 (2CH), 111.0 (CH), 108.8 (CH), 72.2 (C), 66.7 (C), 60.5 (CH, q,  $J$  = 30 Hz), 55.3 (CH<sub>3</sub>), 50.5 (CH), 26.5 (CH<sub>3</sub>);  $^{19}\text{F}$  NMR (376MHz,  $\text{DMSO}-d_6$ )  $\delta$  -70.38; HRMS (ESI)  $m/z$ : 517.1346 [M + Na]<sup>+</sup>, calcd for C<sub>27</sub>H<sub>21</sub>O<sub>4</sub>N<sub>2</sub>F<sub>3</sub>Na; Found 517.1340.

**(2'R,3R,4'S,5'S)-4'-(4-(benzyloxy)phenyl)-1''-methyl-5'-(trifluoromethyl)-2H-dispiro[benzofuran-3,3'-pyrrolidine-2',3''-indoline]-2,2''-dione (4l):**

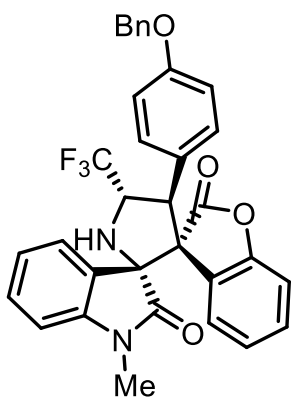

Prepared by following general procedure **C** purified by column chromatography using hexane - Ethyl acetate and isolated product **4l** in 76% yield as a white solid with M. P. 229 - 231 °C; The enantiomeric ratio (*er*) was determined by chiral stationary phase HPLC using a DAICEL IC column (hexane/EtOAc = 80:20, flow rate 0.5 mL/min,  $\lambda$  = 254 nm),  $t_R$  = 12.732 min (minor),  $t_R$  = 14.981 min (major),  $[\alpha]_D^{25}$  = +5.790 ( $\text{CH}_2\text{Cl}_2$ ,  $c$  = 0.6 g/100mL,  $\text{CH}_2\text{Cl}_2$  for 61:39 *er*); IR (neat)  $\nu_{\text{max}}$  3371, 1801, 1724, 1612, 1141, and 752  $\text{cm}^{-1}$ ;  $^1\text{H}$  NMR (400 MHz,  $\text{DMSO}-d_6$ )  $\delta$  8.16 (1H, d,  $J$  = 7.4 Hz), 7.39 – 7.28 (7H, m), 7.19 (1H, t,  $J$  = 7.8 Hz), 6.99 (2H, d,  $J$  = 8.7 Hz), 6.87 (2H, dd,  $J$  = 12.4, 7.8 Hz), 6.75 (3H, d,  $J$  = 8.7 Hz), 6.63 (1H, t,  $J$  = 7.6 Hz), 5.36 (1H, d,  $J$  = 9.9 Hz), 5.05 – 4.98 (2H, m), 4.92 (2H, s), 3.08 (3H, s);  $^{13}\text{C}$  NMR (100 MHz,  $\text{DMSO}-d_6$ , DEPT-135)  $\delta$  175.5 (C, C-C=O), 172.8 (C, N-C=O), 158.3 (C), 152.1 (C), 144.2 (C), 137.2 (C), 130.9 (CH), 130.8 (CH), 129.9 (CH), 128.9 (3CH), 128.4 (CH), 128.3 (3CH), 127.9 (CH), 126.7 (CF<sub>3</sub>, q,  $J$  = 279 Hz), 126.0 (CH), 125.0 (C), 124.4 (CH), 123.7 (C), 123.5 (C), 121.7 (CH), 114.8 (CH), 111.0 (CH), 108.8 (CH), 72.3 (C), 69.5 (CH<sub>2</sub>), 66.7 (C), 60.5 (CH, q,  $J$  = 30 Hz), 50.5 (CH), 26.4 (CH<sub>3</sub>);  $^{19}\text{F}$  NMR (376MHz,  $\text{DMSO}-d_6$ )  $\delta$  -70.40; HRMS (ESI)  $m/z$ : 593.1659 [M + Na]<sup>+</sup>, calcd for C<sub>33</sub>H<sub>25</sub>O<sub>4</sub>N<sub>2</sub>F<sub>3</sub>Na; Found 593.1650.

**(2'R,3R,4'S,5'S)-1''-methyl-4'-(2-nitrophenyl)-5'-(trifluoromethyl)-2H-dispiro[benzofuran-3,3'-pyrrolidine-2',3''-indoline]-2,2''-dione (4m):**

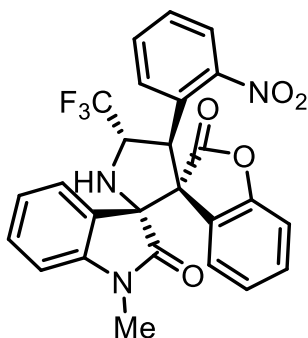

Prepared by following general procedure **C** purified by column chromatography using hexane - Ethyl acetate and isolated product **4m** in 63% yield as a white solid with M. P. 234 - 236 °C;  $[\alpha]_D^{25} = 0.000$  ( $\text{CH}_2\text{Cl}_2$ ,  $c = 0.5$  g/100mL); IR (neat)  $\nu_{\text{max}}$  2364, 1793, 1720, 1531, 1126 and 752  $\text{cm}^{-1}$ ;  $^1\text{H}$  NMR (400 MHz,  $\text{CDCl}_3$ )  $\delta$  7.81 – 7.79 (1H, m), 7.67 (1H, dd,  $J = 8.0, 1.3$  Hz), 7.37 – 7.27 (3H, m), 7.21 – 7.13 (3H, m), 6.84 – 6.79 (2H, m), 6.69 – 6.65 (2H, m), 6.50 (1H, d,  $J = 10.6$  Hz), 4.86 – 4.78 (1H, m), 3.19 (3H, s), 2.95 (1H, d,  $J = 5.2$  Hz);  $^{13}\text{C}$  NMR (100 MHz,  $\text{CDCl}_3$ , DEPT-135)

$\delta$  175.2 (C, C-C=O), 171.1 (C, N-C=O), 153.3 (C), 151.4 (C), 144.4 (C), 131.1 (CH), 130.9 (CH), 130.6 (CH), 129.1 (2CH), 126.9 (CH), 125.9 (C), 125.4 (CH), 125.2 ( $\text{CF}_3$ , q,  $J = 279$  Hz), 125.1 (CH), 123.7 (C), 123.5 (CH), 123.0 (C), 121.8 (CH), 111.8 (CH), 108.4 (CH), 71.7 (C), 65.5 (C), 62.2 (CH, q,  $J = 32$  Hz), 43.3 (CH), 26.6 ( $\text{CH}_3$ );  $^{19}\text{F}$  NMR (376MHz,  $\text{CDCl}_3$ )  $\delta$  -71.65; HRMS (ESI)  $m/z$ : 532.1091 [ $\text{M} + \text{Na}$ ] $^+$ , calcd for  $\text{C}_{26}\text{H}_{18}\text{O}_5\text{N}_3\text{F}_3\text{Na}$ ; Found 532.1070.

**(2'R,3R,4'S,5'S)-1''-methyl-4'-(4-nitrophenyl)-5'-(trifluoromethyl)-2H-dispiro[benzofuran-3,3'-pyrrolidine-2',3''-indoline]-2,2''-dione (4n):**

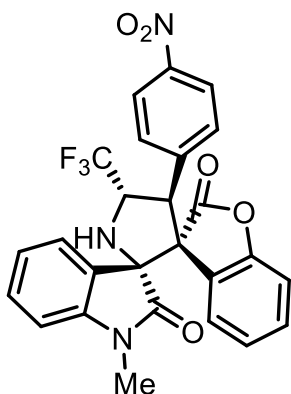

Prepared by following general procedure **C** purified by column chromatography using hexane - Ethyl acetate and isolated product **4n** in 77% yield as a white solid with M. P. 232 - 234 °C; The enantiomeric ratio (*er*) was determined by chiral stationary phase HPLC using a DAICEL IC column (hexane/EtOAc = 80:20, flow rate 0.5 mL/min,  $\lambda = 254$  nm),  $t_R = 13.550$  min (major),  $t_R = 18.315$  min (minor),  $[\alpha]_D^{25} = -66.305$  ( $\text{CH}_2\text{Cl}_2$ ,  $c = 0.7$  g/100mL,  $\text{CH}_2\text{Cl}_2$  for 76:24 *er*); IR (neat)  $\nu_{\text{max}}$  3375, 1801, 1724, 1612, 1350, and 752  $\text{cm}^{-1}$ ;  $^1\text{H}$  NMR (400 MHz,  $\text{DMSO}-d_6$ )  $\delta$  8.19 (1H, d,  $J = 6.9$  Hz), 7.98 (2H, d,  $J = 8.8$  Hz), 7.42 (2H, d,  $J = 8.8$  Hz), 7.37 (1H, td,  $J = 7.6$ ,

1.2 Hz), 7.30 (1H, td,  $J = 7.7, 1.1$  Hz), 7.20 (1H, td,  $J = 7.6, 1.1$  Hz), 6.91 (1H, d,  $J = 7.8$  Hz), 6.86 (1H, dd,  $J = 7.9, 0.6$  Hz), 6.72 (1H, d,  $J = 6.8$  Hz), 6.64 (1H, td,  $J = 7.5, 0.6$  Hz), 5.54 (1H, d,  $J = 10.1$  Hz), 5.28 – 5.17 (2H, m), 3.10 (3H, s);  $^{13}\text{C}$  NMR (100 MHz,  $\text{DMSO}-d_6$ , DEPT-135)  $\delta$  175.2 (C, C-C=O), 172.3 (C, N-C=O), 152.1 (C), 147.6 (C), 144.3 (C), 140.9 (C), 131.2 (CH), 131.1 (CH), 130.3 (2CH), 127.9 (CH), 126.2 (CH), 124.6 (CH), 123.7 ( $\text{CF}_3$ , q,  $J = 279$  Hz), 123.7 (2CH), 123.0 (C), 122.9 (C), 121.7 (CH), 111.2 (CH), 108.9 (CH), 72.6 (C), 66.6 (C), 60.3 (CH, q,  $J = 30$  Hz), 50.6 (CH), 26.5 ( $\text{CH}_3$ );  $^{19}\text{F}$  NMR (376MHz,  $\text{DMSO}-d_6$ )  $\delta$  -70.61; HRMS (ESI)  $m/z$ : 532.1091 [ $\text{M} + \text{Na}$ ] $^+$ , calcd for  $\text{C}_{26}\text{H}_{18}\text{O}_5\text{N}_3\text{F}_3\text{Na}$ ; Found 532.1078.

**(2'R,3R,4'S,5'S)-4'-(3,4-dimethoxyphenyl)-1''-methyl-5'-(trifluoromethyl)-2H-dispiro[benzofuran-3,3'-pyrrolidine-2',3''-indoline]-2,2''-dione (4o):**

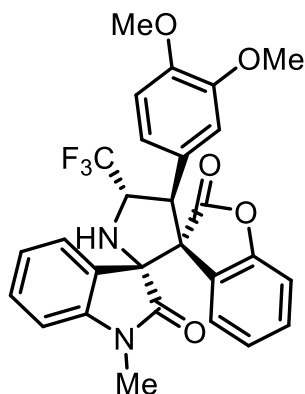

Prepared by following general procedure **C** purified by column chromatography using hexane - Ethyl acetate and isolated product **4o** in 83% yield as a white solid with M. P. 236 - 238 °C; The enantiomeric ratio (*er*) was determined by chiral stationary phase HPLC using a DAICEL IC column (hexane/EtOAc = 80:20, flow rate 0.5 mL/min,  $\lambda$  = 254 nm),  $t_R$  = 15.287 min (minor),  $t_R$  = 17.907 min (major),  $[\alpha]_D^{25}$  = +9.441 ( $\text{CH}_2\text{Cl}_2$ ,  $c$  = 0.6 g/100mL,  $\text{CH}_2\text{Cl}_2$  for 53:47 *er*); IR (neat)  $\nu_{\text{max}}$  1801, 1720, 1519, 1465, 1265, 1141, and 752  $\text{cm}^{-1}$ ;  $^1\text{H}$  NMR (400 MHz,  $\text{DMSO}-d_6$ )  $\delta$  8.21 (1H, d,  $J$  = 7.4 Hz), 7.39 (1H, t,  $J$  = 7.5 Hz), 7.32 (1H, t,  $J$  = 7.7 Hz), 7.20 (1H, t,  $J$  = 7.6 Hz), 6.89 (2H, t,  $J$  = 8.0 Hz), 6.80 (1H, d,  $J$  = 7.4 Hz), 6.71 (1H, d,  $J$  = 8.4 Hz), 6.65 (1H, t,  $J$  = 7.5 Hz), 6.60 (1H, dd,  $J$  = 8.4, 1.7 Hz), 6.48 (1H, d,  $J$  = 1.7 Hz), 5.34 (1H, d,  $J$  = 10.2 Hz), 5.05 – 4.96 (2H, m), 3.61 (3H, s), 3.74 (3H, s), 3.09 (3H, s);  $^{13}\text{C}$  NMR (100 MHz,  $\text{DMSO}-d_6$ , DEPT-135)  $\delta$  175.5 (C, C=O), 172.7 (C, N-C=O), 152.2 (C), 148.7 (C, d,  $J$  = 3.7 Hz), 148.3 (C, d,  $J$  = 3.9 Hz), 144.2 (C), 130.8 (2CH, d,  $J$  = 9.6 Hz), 128.0 (CH), 126.6 (CF<sub>3</sub>, q,  $J$  = 279 Hz), 126.2 (CH), 125.0 (C, d,  $J$  = 3.3 Hz), 124.3 (CH), 123.8 (C), 123.6 (C), 121.6 (2CH), 111.8 (CH, d,  $J$  = 8 Hz), 111.5 (CH, d,  $J$  = 5.9 Hz), 111.2 (CH), 108.8 (CH), 72.0 (C), 66.7 (C), 60.6 (CH, q,  $J$  = 30 Hz), 55.7 (CH<sub>3</sub>, d,  $J$  = 31 Hz), 55.6 (CH<sub>3</sub>, d,  $J$  = 29 Hz), 50.9 (CH), 26.4 (CH<sub>3</sub>);  $^{19}\text{F}$  NMR (376MHz,  $\text{DMSO}-d_6$ )  $\delta$  -70.45; HRMS (ESI)  $m/z$ : 547.1451 [ $M + \text{Na}$ ]<sup>+</sup>, calcd for  $\text{C}_{28}\text{H}_{23}\text{O}_5\text{N}_2\text{F}_3\text{Na}$ ; Found 547.1444.

**(2'R,3R,4'S,5'S)-4'-(3-(benzyloxy)-4-methoxyphenyl)-1''-methyl-5'-(trifluoromethyl)-2H-dispiro[benzofuran-3,3'-pyrrolidine-2',3''-indoline]-2,2''-dione (4p):**

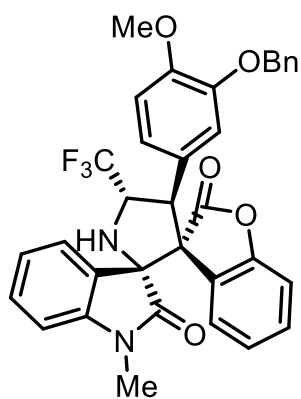

Prepared by following general procedure **C** purified by column chromatography using hexane - Ethyl acetate and isolated product **4p** in 79% yield as a white solid with M. P. 243 - 245 °C; The enantiomeric ratio (*er*) was determined by chiral stationary phase HPLC using a DAICEL IA column (hexane/EtOAc = 80:20, flow rate 1.0 mL/min,  $\lambda$  = 254 nm),  $t_R$  = 11.512 min (minor),  $t_R$  = 26.732 min (major),  $[\alpha]_D^{25}$  = -44.977 ( $\text{CH}_2\text{Cl}_2$ ,  $c$  = 0.5 g/100mL,  $\text{CH}_2\text{Cl}_2$  for 76:24 *er*); IR (neat)  $\nu_{\text{max}}$  3325, 1801, 1720, 1161, and 752  $\text{cm}^{-1}$ ;  $^1\text{H}$  NMR (400 MHz,  $\text{DMSO}-d_6$ )  $\delta$  8.15 (1H, d,  $J$  = 7.4 Hz), 7.36 – 7.25 (7H, m), 7.13 (1H, t,  $J$  = 7.3 Hz), 6.83 (2H, d,  $J$  = 7.9 Hz), 6.74 (1H, d,  $J$  = 7.5 Hz), 6.68 (1H, d,  $J$  = 8.4 Hz), 6.61 – 6.55 (3H, m), 5.27 (1H, d,  $J$  = 10.8 Hz), 5.00 (1H, d,  $J$  = 8.5 Hz), 4.93 – 4.83 (1H, m), 4.75 (1H, d,  $J$  = 11.6 Hz), 4.52 (1H, d,  $J$  = 11.6 Hz), 3.56 (3H, s), 3.03 (3H, s);  $^{13}\text{C}$  NMR (100 MHz,  $\text{DMSO}-d_6$ , DEPT-135)  $\delta$  175.5 (C, C=O), 172.6 (C, N-C=O), 152.3 (C, d,  $J$  = 1 Hz), 149.2 (C, d,  $J$  = 5 Hz), 147.4 (C, d,  $J$  = 4 Hz), 144.3 (C), 137.2 (C, d,  $J$  = 3 Hz), 130.8 (CH, d,  $J$  = 6 Hz), 128.9 (2CH), 128.4 (CH), 128.2 (2CH, d,  $J$  = 4 Hz), 128.1 (CH), 126.7 (CF<sub>3</sub>, q,  $J$  = 280 Hz), 126.2 (CH), 125.0 (C, d,  $J$  = 4 Hz), 124.3 (CH), 123.9 (C, d,  $J$  = 1 Hz), 123.6 (C, d,  $J$  = 2 Hz), 122.2 (CH), 121.6 (CH), 113.9 (CH, d,  $J$  = 13 Hz), 111.9 (CH, d,  $J$  = 8 Hz), 111.2 (CH), 108.8 (CH), 72.0 (C,

d,  $J = 2$  Hz), 70.7 (CH<sub>2</sub>), 70.6 (C), 66.7 (C), 60.6 (CH, q,  $J = 30$  Hz), 55.7 (CH<sub>3</sub>, d,  $J = 3$  Hz), 50.9 (CH), 26.5 (CH<sub>3</sub>); **<sup>19</sup>F NMR (376MHz, DMSO-*D*<sub>6</sub>)**  $\delta$  -70.45; **HRMS (ESI)**  $m/z$ : 623.1764 [M + Na]<sup>+</sup>, calcd for C<sub>34</sub>H<sub>27</sub>O<sub>5</sub>N<sub>2</sub>F<sub>3</sub>Na; Found 623.1761.

**(2'R,3R,4'S,5'S)-4'-(3-hydroxy-4-methoxyphenyl)-1''-methyl-5'-(trifluoromethyl)-2H-dispiro[benzofuran-3,3'-pyrrolidine-2',3''-indoline]-2,2''-dione (4q):**

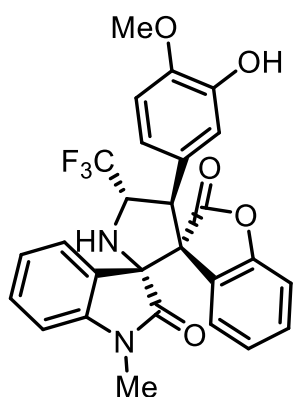

Prepared by following general procedure **C** purified by column chromatography using hexane - Ethyl acetate and isolated product **4q** in 74% yield as a white solid with M. P. 217 - 219 °C;  $[\alpha]_D^{25} = -14.419$  (CH<sub>2</sub>Cl<sub>2</sub>,  $c = 0.8$  g/100mL); **IR (neat)**  $\nu_{\max}$  3325, 1797, 1712, 1130, and 752 cm<sup>-1</sup>; **<sup>1</sup>H NMR (400 MHz, DMSO-*D*<sub>6</sub>)**  $\delta$  8.83 (1H, s), 8.08 (1H, d,  $J = 7$  Hz), 7.29 (1H, td,  $J = 7.4, 0.8$  Hz), 7.23 (1H, td,  $J = 7.7, 1.1$  Hz), 7.12 (1H, td,  $J = 7.6, 0.9$  Hz), 6.81 (2H, t,  $J = 7.1$  Hz), 6.67 (1H, d,  $J = 7.1$  Hz), 6.59 – 6.55 (2H, m), 6.40 – 6.37 (2H, m), 5.20 (1H, d,  $J = 10.8$  Hz), 4.92 (1H, d,  $J = 8.8$  Hz), 4.87 – 4.77 (1H, m), 3.55 (3H, s), 3.02 (3H, s); **<sup>13</sup>C NMR (100 MHz, DMSO-*D*<sub>6</sub>, DEPT-135)**  $\delta$  175.4 (C, C-C=O), 172.8 (C, N-C=O), 152.2 (C), 147.6 (C), 146.2 (C), 144.2 (C), 130.8 (CH), 130.7 (CH), 127.9 (CH), 126.7 (CF<sub>3</sub>, q,  $J = 279$  Hz), 125.9 (CH), 125.2 (C), 124.3 (CH), 123.9 (C), 123.6 (C), 121.6 (CH), 119.6 (CH), 116.0 (CH), 111.9 (CH), 111.0 (CH), 108.8 (CH), 72.3 (C), 66.7 (C), 60.6 (CH, q,  $J = 30$  Hz), 55.7 (CH<sub>3</sub>), 50.5 (CH), 26.5 (CH<sub>3</sub>); **<sup>19</sup>F NMR (376MHz, DMSO-*D*<sub>6</sub>)**  $\delta$  -70.32; **HRMS (ESI)**  $m/z$ : 533.1295 [M + Na]<sup>+</sup>, calcd for C<sub>27</sub>H<sub>21</sub>O<sub>5</sub>N<sub>2</sub>F<sub>3</sub>Na; Found 533.1294.

**(2'R,3R,4'S,5'S)-1''-methyl-5'-(trifluoromethyl)-4'-(2,3,4-trimethoxyphenyl)-2H-dispiro[benzofuran-3,3'-pyrrolidine-2',3''-indoline]-2,2''-dione (4r):**

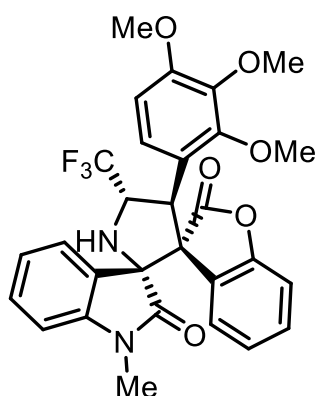

Prepared by following general procedure **C** purified by column chromatography using hexane - Ethyl acetate and isolated product **4r** in 93% yield as a white solid with M. P. 268 - 270 °C; The enantiomeric ratio (*er*) was determined by chiral stationary phase HPLC using a DAICEL IC column (hexane/EtOAc = 80:20, flow rate 0.5 mL/min,  $\lambda = 254$  nm),  $t_R = 15.412$  min (minor),  $t_R = 17.203$  min (major),  $[\alpha]_D^{25} = +300.461$  (CH<sub>2</sub>Cl<sub>2</sub>,  $c = 1.1$  g/100mL, CH<sub>2</sub>Cl<sub>2</sub> for 99:1 *er*); **IR (neat)**  $\nu_{\max}$  3325, 1797, 1720, 1107, and 752 cm<sup>-1</sup>; **<sup>1</sup>H NMR (400 MHz, DMSO-*D*<sub>6</sub>)**  $\delta$  8.16 (1H, d,  $J = 6.9$  Hz), 7.33 (2H, quin,  $J = 6.2$  Hz), 7.20 (1H, t,  $J = 7.6$  Hz), 6.89 (2H, d,  $J = 7.7$  Hz), 6.85 (1H, d,  $J = 7.4$  Hz), 6.65 (2H, dd,  $J = 16.8, 7.6$  Hz), 6.41 (1H, d,  $J = 8.9$  Hz), 5.90 (1H, d,  $J = 10.8$  Hz), 4.97 (1H, d,  $J = 8.8$  Hz), 4.88 – 4.82 (1H, m), 3.70 (3H, s), 3.64 (3H, s), 3.61 (3H, s), 3.10 (3H, s); **<sup>13</sup>C NMR (100 MHz, DMSO-*D*<sub>6</sub>, DEPT-135)**  $\delta$  175.5 (C, C-C=O), 172.0 (C, N-C=O), 153.1 (C), 152.6 (CH), 152.4 (C, d,  $J = 2$  Hz), 144.5 (C), 141.3 (C, d,  $J = 5$  Hz), 130.8 (CH), 130.6 (CH), 128.1 (CH), 126.7 (CF<sub>3</sub>, q,  $J = 279$  Hz), 126.2 (CH), 128.1 (CH), 126.2 (CH), 124.2 (C, d,  $J = 2$  Hz), 123.9 (CH), 123.7 (C, d,  $J = 3$  Hz), 121.5 (CH), 118.6 (C, d,  $J = 3$  Hz), 110.9 (CH), 108.7 (CH), 107.0 (CH, d,  $J = 3$  Hz), 72.1 (C), 61.6 (CH, q,  $J = 30$  Hz), 61.3 (CH<sub>3</sub>), 60.6 (CH<sub>3</sub>), 55.6 (CH<sub>3</sub>, d,  $J = 3$  Hz), 43.9 (CH),



26.5 (CH<sub>3</sub>); <sup>19</sup>F NMR (376MHz, DMSO-*D*<sub>6</sub>) δ -70.08; HRMS (ESI) *m/z*: 577.1557 [M + Na]<sup>+</sup>, calcd for C<sub>29</sub>H<sub>25</sub>O<sub>6</sub>N<sub>2</sub>F<sub>3</sub>Na; Found 577.1559.

**(2'R,3R,4'S,5'S)-1''-methyl-4'-(naphthalen-1-yl)-5'-(trifluoromethyl)-2H-dispiro[benzofuran-3,3'-pyrrolidine-2',3''-indoline]-2,2''-dione (4s):**

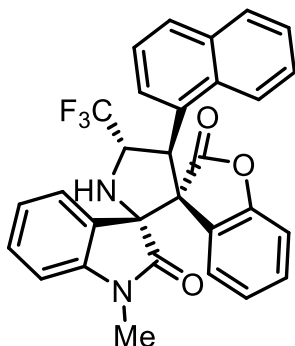

Prepared by following general procedure **C** purified by column chromatography using hexane - Ethyl acetate and isolated product **4s** in 81% yield as a white solid with M. P. 280 - 282 °C; The enantiomeric ratio (*er*) was determined by chiral stationary phase HPLC using a DAICEL IC column (hexane/EtOAc = 92:8, flow rate 0.4 mL/min, λ = 254 nm), *t<sub>R</sub>* = 14.504 min (minor), *t<sub>R</sub>* = 15.828 min (major), [α]<sub>D</sub><sup>25</sup> = +16.000 (CH<sub>2</sub>Cl<sub>2</sub>, *c* = 0.1 g/100mL, CH<sub>2</sub>Cl<sub>2</sub> for 76:24 *er*); IR (neat) *ν*<sub>max</sub> 3329, 1793, 1712, 1145, and 752 cm<sup>-1</sup>; <sup>1</sup>H NMR (400 MHz, DMSO-*D*<sub>6</sub>) δ 8.34 (1H, d, *J* = 7.4 Hz), 8.27 (1H, d, *J* = 8.7 Hz), 7.79 (1H, d, *J* = 7.8 Hz), 7.64 (1H, d, *J* = 8.1 Hz), 7.35 (1H, t, *J* = 7.1 Hz), 7.45 (1H, d, *J* = 7.4 Hz), 7.40 (1H, t, *J* = 8.4 Hz), 7.29 – 7.22 (2H, m), 7.16 (1H, t, *J* = 7.7 Hz), 7.07 (1H, t, *J* = 7.8 Hz), 6.88 (1H, d, *J* = 7.7 Hz), 6.81 (1H, d, *J* = 7.3 Hz), 6.72 (2H, t, *J* = 8.4 Hz), 6.63 (1H, t, *J* = 7.4 Hz), 5.13 (1H, d, *J* = 8.6 Hz), 5.08 – 5.02 (1H, m), 3.11 (3H, s); <sup>13</sup>C NMR (100 MHz, DMSO-*D*<sub>6</sub>, DEPT-135) δ 175.8 (C, C-C=O), 172.5 (C, N-C=O), 152.5 (C), 144.4 (C), 133.8 (C), 132.2 (C), 130.9 (2CH, d, *J* = 3 Hz), 129.2 (CH), 128.9 (CH), 128.5 (2CH), 127.2 (CH), 127.1 (CH), 126.7 (CF<sub>3</sub>, q, *J* = 279 Hz), 126.3 (2CH), 124.9 (CH), 124.4 (CH), 123.7 (C), 123.5 (C), 123.0 (CH), 121.8 (CH), 111.2 (CH), 108.9 (CH), 72.3 (C), 65.9 (C), 62.0 (CH, q, *J* = 30 Hz), 43.9 (CH), 26.6 (CH<sub>3</sub>); <sup>19</sup>F NMR (376MHz, DMSO-*D*<sub>6</sub>) δ -70.57; HRMS (ESI) *m/z*: 537.1396 [M + Na]<sup>+</sup>, calcd for C<sub>30</sub>H<sub>21</sub>O<sub>3</sub>N<sub>2</sub>F<sub>3</sub>Na; Found 537.1389.

**(2'R,3R,4'S,5'S)-4'-(furan-2-yl)-1''-methyl-5'-(trifluoromethyl)-2H-dispiro[benzofuran-3,3'-pyrrolidine-2',3''-indoline]-2,2''-dione (4t):**

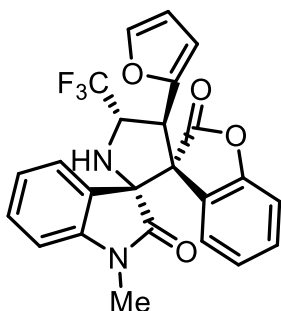

Prepared by following general procedure **C** purified by column chromatography using hexane - Ethyl acetate and isolated product **4t** in 87% yield as a white solid with M. P. 241 - 244 °C; The enantiomeric ratio (*er*) was determined by chiral stationary phase HPLC using a DAICEL IC column (hexane/EtOAc = 90:10, flow rate 0.5 mL/min, λ = 254 nm), *t<sub>R</sub>* = 44.518 min (major), *t<sub>R</sub>* = 47.097 min (minor), [α]<sub>D</sub><sup>25</sup> = -88.250 (CH<sub>2</sub>Cl<sub>2</sub>, *c* = 0.8 g/100mL, CH<sub>2</sub>Cl<sub>2</sub> for 72:28 *er*); IR (neat) *ν*<sub>max</sub> 1801, 1716, 1614, 1139, and 752 cm<sup>-1</sup>; <sup>1</sup>H NMR (400 MHz, CDCl<sub>3</sub>) δ 7.68 – 7.65 (1H, m), 7.28 – 7.25 (2H, m), 7.17 (1H, td, *J* = 8.8, 3.8 Hz), 7.05 – 7.04 (1H, m), 6.85 – 6.79 (1H, m), 6.69 (1H, d, *J* = 7.8 Hz), 6.63 (2H, d, *J* = 4.3 Hz), 6.09 – 6.07 (2H, m), 5.61 (1H, d, *J* = 10.4 Hz), 4.93 – 4.84 (1H, m), 3.18 (3H, s), 2.91 – 2.88 (1H, m); <sup>13</sup>C NMR (100 MHz, CDCl<sub>3</sub>, DEPT-135) δ 175.7 (C, C-C=O), 171.9 (C, N-C=O), 152.8 (C), 147.2 (C), 144.2 (C), 142.6 (CH), 130.6 (CH), 130.3 (CH), 126.4 (CH), 125.3 (CF<sub>3</sub>, q, *J* = 279 Hz), 125.1 (CH), 124.0 (C), 123.6 (CH), 123.4 (C), 121.9 (CH), 111.2 (CH), 110.2 (CH), 108.8 (CH), 108.3

(CH), 71.7 (C), 64.5 (C), 60.9 (CH, q,  $J = 32$  Hz), 45.1 (CH), 26.4 (CH<sub>3</sub>); **<sup>19</sup>F NMR (376MHz, CDCl<sub>3</sub>)**  $\delta$  -71.99; **HRMS (ESI)**  $m/z$ : 477.1033 [M + Na]<sup>+</sup>, calcd for C<sub>24</sub>H<sub>17</sub>O<sub>4</sub>N<sub>2</sub>F<sub>3</sub>Na; Found 477.1018.

**(2'R,3R,4'S,5'S)-1''-methyl-4'-(thiophen-2-yl)-5'-(trifluoromethyl)-2H-dispiro[benzofuran-3,3'-pyrrolidine-2',3''-indoline]-2,2''-dione (4u):**

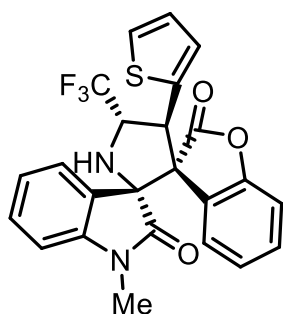

Prepared by following general procedure **C** purified by column chromatography using hexane - Ethyl acetate and isolated product **4u** in 83% yield as a white solid with M. P. 237 - 241 °C; The enantiomeric ratio (*er*) was determined by chiral stationary phase HPLC using a DAICEL IC column (hexane/EtOAc = 80:20, flow rate 0.5 mL/min,  $\lambda = 254$  nm),  $t_R = 11.905$  min (major),  $t_R = 13.214$  min (minor),  $[\alpha]_D^{25} = -127.529$  (CH<sub>2</sub>Cl<sub>2</sub>,  $c = 0.9$  g/100mL, CH<sub>2</sub>Cl<sub>2</sub> for 86:14 *er*); IR (neat)  $\nu_{\max}$  2922, 1801, 1716, 1141, and 752 cm<sup>-1</sup>;

**<sup>1</sup>H NMR (400 MHz, CDCl<sub>3</sub>)**  $\delta$  7.82 – 7.79 (1H, m), 7.35 (2H, dquin,  $J = 6.6, 1.4$  Hz), 7.17 (1H, td,  $J = 7.7, 1.2$  Hz), 7.01 (1H, dd,  $J = 5.0, 1.0$  Hz), 6.88 – 6.87 (1H, m), 6.84 – 6.82 (1H, m), 6.78 – 6.73 (2H, m), 6.70 (1H, d,  $J = 7.8$  Hz), 6.65 (1H, td,  $J = 7.6, 0.9$  Hz), 5.91 (1H, d,  $J = 10.5$  Hz), 4.69 – 4.61 (1H, m), 3.20 (3H, s), 2.87 (1H, d,  $J = 3.9$  Hz); **<sup>13</sup>C NMR (100 MHz, CDCl<sub>3</sub>, DEPT-135)**  $\delta$  176.0 (C, C-C=O), 171.8 (C, N-C=O), 153.2 (C), 144.2 (C), 134.5 (C), 130.8 (CH), 130.6 (CH), 128.1 (CH), 126.8 (CH), 126.4 (CH), 125.9 (CH), 125.4 (CH), 125.3 (CF<sub>3</sub>, q,  $J = 280$  Hz), 123.9 (CH), 123.8 (C), 123.8 (C), 121.9 (CH), 111.6 (CH), 108.3 (CH), 71.2 (C), 65.7 (C), 63.9 (CH, q,  $J = 31$  Hz), 47.0 (CH), 26.5 (CH<sub>3</sub>); **<sup>19</sup>F NMR (376MHz, CDCl<sub>3</sub>)**  $\delta$  -71.44; **HRMS (ESI)**  $m/z$ : 493.0804 [M + Na]<sup>+</sup>, calcd for C<sub>24</sub>H<sub>17</sub>O<sub>3</sub>N<sub>2</sub>F<sub>3</sub>NaS; Found 493.0791.

**(2'R,3R,4'S,5'S)-5''-fluoro-1''-methyl-4'-phenyl-5'-(trifluoromethyl)-2H-dispiro[benzofuran-3,3'-pyrrolidine-2',3''-indoline]-2,2''-dione (4w):**

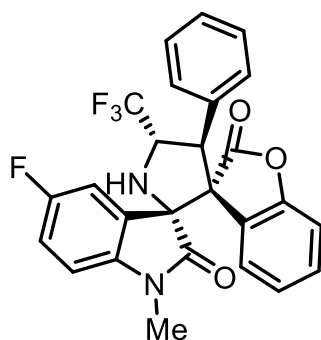

Prepared by following general procedure **C** purified by column chromatography using hexane - Ethyl acetate and isolated product **4w** in 91% yield as a white solid with M. P. 250 - 252 °C; The enantiomeric ratio (*er*) was determined by chiral stationary phase HPLC using a DAICEL IC column (hexane/EtOAc = 80:20, flow rate 0.5 mL/min,  $\lambda = 254$  nm),  $t_R = 9.763$  min (major),  $t_R = 11.426$  min (minor),  $[\alpha]_D^{25} = -98.881$  (CH<sub>2</sub>Cl<sub>2</sub>,  $c = 1.3$  g/100mL, CH<sub>2</sub>Cl<sub>2</sub> for 93:7 *er*); IR (neat)  $\nu_{\max}$  3336, 1793, 1720, 1168, and 763 cm<sup>-1</sup>; **<sup>1</sup>H NMR (400 MHz, DMSO-D<sub>6</sub>)**  $\delta$  8.10 (1H, d,  $J = 7.4$

Hz), 7.32 (1H, t,  $J = 7.4$  Hz), 7.25 (1H, t,  $J = 7.6$  Hz), 7.05 – 6.98 (6H, m), 6.86 – 6.80 (2H, m), 6.49 (1H, dd,  $J = 9.1, 2.5$  Hz), 5.31 (1H, d,  $J = 10.6$  Hz), 5.12 (1H, d,  $J = 8.4$  Hz), 5.07 – 4.99 (1H, m), 3.03 (3H, s); **<sup>13</sup>C NMR (100 MHz, DMSO-D<sub>6</sub>, DEPT-135)**  $\delta$  175.2 (C, C-C=O), 172.4 (C, N-C=O), 157.5 (C-F, d,  $J = 235$  Hz), 152.2 (C), 140.5 (C), 132.9 (C), 131.0 (CH), 128.8 (2CH), 128.7 (2CH), 128.5 (CH), 127.9 (CH), 126.6 (CF<sub>3</sub>, q,  $J = 279$  Hz), 125.1 (C), 124.4 (CH), 123.3 (C), 117.1 (CH, d,  $J = 24$  Hz), 114.3 (CH, d,  $J = 26$  Hz), 111.2 (CH), 109.6 (CH, d,  $J = 8$  Hz), 72.5 (C), 66.7 (C), 60.2 (CH, q,  $J = 30$  Hz),

50.9 (CH), 26.7 (CH<sub>3</sub>); **<sup>19</sup>F NMR (376MHz, DMSO-D<sub>6</sub>)** δ -70.54, -121.54; **HRMS (ESI)** m/z: 505.1146 [M + Na]<sup>+</sup>, calcd for C<sub>26</sub>H<sub>18</sub>O<sub>3</sub>N<sub>2</sub>F<sub>4</sub>Na; Found 505.1142.

**(2'R,3R,4'S,5'S)-7''-fluoro-1''-methyl-4'-phenyl-5'-(trifluoromethyl)-2H-dispiro[benzofuran-3,3'-pyrrolidine-2',3''-indoline]-2,2''-dione (4x):**

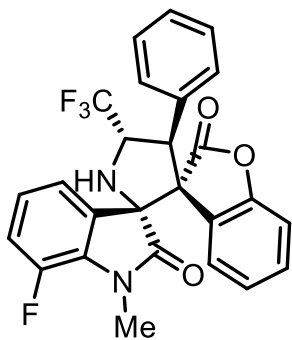

Prepared by following general procedure **C** purified by column chromatography using hexane - Ethyl acetate and isolated product **4x** in 96% yield as a white solid with M. P. 216 - 218 °C; The enantiomeric ratio (*er*) was determined by chiral stationary phase HPLC using a DAICEL IC column (hexane/EtOAc = 80:20, flow rate 0.5 mL/min, λ = 254 nm), *t<sub>R</sub>* = 8.976 min (major), *t<sub>R</sub>* = 9.736 min (minor), **[α]<sub>D</sub><sup>25</sup> = -147.960 (CH<sub>2</sub>Cl<sub>2</sub>, c = 0.8 g/100mL, CH<sub>2</sub>Cl<sub>2</sub> for 95:5 *er*); IR (neat) ν<sub>max</sub>** 3325, 1793, 1708, 1083, and 756 cm<sup>-1</sup>; **<sup>1</sup>H NMR (400 MHz, CDCl<sub>3</sub>)** δ 7.79 (1H, d, *J* = 6.9 Hz), 7.31 (1H, t, *J* = 7.5 Hz), 7.24 (1H, td, *J* = 7.7, 1.0 Hz), 7.11 – 7.04 (5H, m), 6.92 – 6.87 (1H, m), 6.73 (1H, d, *J* = 7.8 Hz), 6.60 – 6.55 (2H, m), 5.57 (1H, d, *J* = 10.7 Hz), 4.94 – 4.85 (1H, m), 3.43 (3H, d, *J* = 2.9 Hz), 2.85 (1H, d, *J* = 5.8 Hz); **<sup>13</sup>C NMR (100 MHz, CDCl<sub>3</sub>, DEPT-135)** δ 175.9 (C, C-C=O), 171.9 (C, N-C=O), 152.8 (C), 147.3 (C-F, d, *J* = 242 Hz), 131.8 (C), 130.9 (C, d, *J* = 9 Hz), 130.5 (CH), 128.4 (2CH), 128.3 (2CH), 128.2 (CH), 126.9 (C, d, *J* = 3 Hz), 126.6 (CH), 125.4 (CF<sub>3</sub>, q, *J* = 279 Hz), 123.5 (CH), 123.4 (C), 122.2 (CH, d, *J* = 6 Hz), 121.3 (CH, d, *J* = 3 Hz), 118.5 (CH, d, *J* = 19 Hz), 111.5 (CH), 71.5 (C, d, *J* = 2 Hz), 66.3 (C), 60.7 (CH, q, *J* = 31 Hz), 50.6 (CH<sub>2</sub>), 29.1 (CH<sub>3</sub>, d, *J* = 6 Hz); **<sup>19</sup>F NMR (376MHz, CDCl<sub>3</sub>)** δ -71.51, -135.49; **HRMS (ESI)** m/z: 505.1146 [M + Na]<sup>+</sup>, calcd for C<sub>26</sub>H<sub>18</sub>O<sub>3</sub>N<sub>2</sub>F<sub>4</sub>Na; Found 505.1147.

**(2'R,3R,4'S,5'S)-5''-chloro-1''-methyl-4'-phenyl-5'-(trifluoromethyl)-2H-dispiro[benzofuran-3,3'-pyrrolidine-2',3''-indoline]-2,2''-dione (4y):**

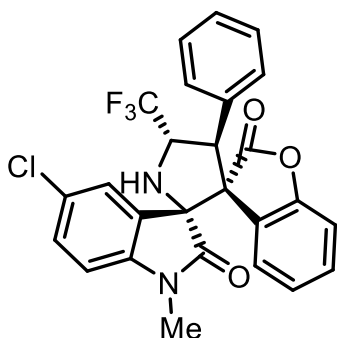

Prepared by following general procedure **C** purified by column chromatography using hexane - Ethyl acetate and isolated product **4y** in 93% yield as a white solid with M. P. 251 - 253 °C; The enantiomeric ratio (*er*) was determined by chiral stationary phase HPLC using a DAICEL IC column (hexane/EtOAc = 80:20, flow rate 0.5 mL/min, λ = 254 nm), *t<sub>R</sub>* = 9.537 min (major), *t<sub>R</sub>* = 10.854 min (minor), **[α]<sub>D</sub><sup>25</sup> = -93.400 (CH<sub>2</sub>Cl<sub>2</sub>, c = 0.5 g/100mL, CH<sub>2</sub>Cl<sub>2</sub> for 95:5 *er*); IR (neat) ν<sub>max</sub>** 3356, 1797, 1720, 1138, and 752 cm<sup>-1</sup>; **<sup>1</sup>H NMR (400 MHz, DMSO-D<sub>6</sub>)** δ 8.10 (1H, d, *J* = 7.8 Hz), 7.32 (1H, td, *J* = 7.6, 0.9 Hz), 7.25 (1H, td, *J* = 7.9, 1.1 Hz), 7.21 (1H, dd, *J* = 8.4, 2.2 Hz), 7.07 – 7.01 (5H, m), 6.87 (1H, d, *J* = 8.4 Hz), 6.83 (1H, dd, *J* = 7.8, 0.6 Hz), 6.70 (1H, d, *J* = 2.1 Hz), 5.29 (1H, d, *J* = 10.7 Hz), 5.14 (1H, d, *J* = 8.4 Hz), 5.09 – 4.99 (1H, m), 3.03 (3H, s); **<sup>13</sup>C NMR (100 MHz, DMSO-D<sub>6</sub>, DEPT-135)** δ 175.1 (C, C-C=O), 172.4 (C, N-C=O), 152.2 (C), 143.1 (C), 132.9 (C), 131.0 (CH), 130.6 (CH), 128.8 (2CH), 128.7 (2CH), 128.5 (CH), 127.9 (CH), 126.7 (CF<sub>3</sub>, q, *J* = 279 Hz), 126.6 (CH), 125.7 (C), 125.3 (C), 124.3 (CH), 123.2 (C), 111.2 (CH), 110.2 (CH), 72.4 (C), 66.7

(C), 60.2 (CH, q,  $J = 30$  Hz), 50.9 (CH), 26.6 (CH<sub>3</sub>); **<sup>19</sup>F NMR (376MHz, DMSO-D<sub>6</sub>)**  $\delta$  -70.62; **HRMS (ESI)**  $m/z$ : 521.0850 [M + Na]<sup>+</sup>, calcd for C<sub>26</sub>H<sub>18</sub>O<sub>3</sub>N<sub>2</sub>F<sub>3</sub>ClNa; Found 521.0834.

**(2'R,3R,4'S,5'S)-5''-bromo-1''-methyl-4'-phenyl-5'-(trifluoromethyl)-2H-dispiro[benzofuran-3,3'-pyrrolidine-2',3''-indoline]-2,2''-dione (4z):**

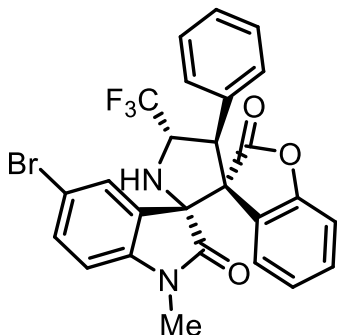

Prepared by following general procedure **C** purified by column chromatography using hexane - Ethyl acetate and isolated product **4z** in 91% yield as a white solid with M. P. 241 - 243 °C; The enantiomeric ratio (*er*) was determined by chiral stationary phase HPLC using a DAICEL IC column (hexane/EtOAc = 80:20, flow rate 0.5 mL/min,  $\lambda = 254$  nm),  $t_R = 9.763$  min (major),  $t_R = 11.008$  min (minor),  $[\alpha]_D^{25} = -68.250$  (CH<sub>2</sub>Cl<sub>2</sub>,  $c = 0.4$  g/100mL, CH<sub>2</sub>Cl<sub>2</sub> for 95:5 *er*); **IR (neat)**  $\nu_{\max}$  2924, 2854, 1805, 1732, and 752 cm<sup>-1</sup>; **<sup>1</sup>H NMR (400 MHz, CDCl<sub>3</sub>)**  $\delta$  7.81 (1H, d,  $J = 6.8$  Hz), 7.37 (1H, td,  $J = 7.5, 0.5$  Hz), 7.30 (2H, td,  $J = 7.8, 1.6$  Hz), 7.13 – 7.05 (5H, m), 6.88 (1H, d,  $J = 1.9$  Hz), 6.77 (1H, d,  $J = 7.9$  Hz), 6.58 (1H, d,  $J = 8.3$  Hz), 5.53 (1H, d,  $J = 10.7$  Hz), 4.93 – 4.84 (1H, m), 3.20 (3H, s), 2.84 (1H, d,  $J = 4.8$  Hz); **<sup>13</sup>C NMR (100 MHz, CDCl<sub>3</sub>, DEPT-135)**  $\delta$  175.7 (C, C-C=O), 171.9 (C, N-C=O), 152.8 (C), 143.1 (C), 133.2 (C), 131.8 (C), 130.7 (CH), 128.9 (CH), 128.4 (2CH), 128.4 (2CH), 128.2 (CH), 126.4 (CH), 126.0 (C), 125.4 (CF<sub>3</sub>, q,  $J = 280$  Hz), 123.7 (CH), 123.3 (C), 114.4 (C), 111.7 (CH), 109.6 (CH), 71.5 (C), 66.2 (C), 60.8 (CH, q,  $J = 31$  Hz), 50.5 (CH), 26.6 (CH<sub>3</sub>); **<sup>19</sup>F NMR (376MHz, CDCl<sub>3</sub>)**  $\delta$  -71.61; **HRMS (ESI)**  $m/z$ : 565.0345 [M + Na]<sup>+</sup>, calcd for C<sub>26</sub>H<sub>18</sub>O<sub>3</sub>N<sub>2</sub>F<sub>3</sub>BrNa; Found 565.0326.

**(2'R,3R,4'S,5'S)-5''-iodo-1''-methyl-4'-phenyl-5'-(trifluoromethyl)-2H-dispiro[benzofuran-3,3'-pyrrolidine-2',3''-indoline]-2,2''-dione (4a'):**

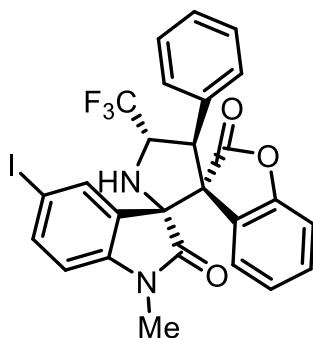

Prepared by following general procedure **C** purified by column chromatography using hexane - Ethyl acetate and isolated product **4a'** in 85% yield as a white solid with M. P. 254 - 256 °C; The enantiomeric ratio (*er*) was determined by chiral stationary phase HPLC using a DAICEL IC column (hexane/EtOAc = 80:20, flow rate 0.5 mL/min,  $\lambda = 254$  nm),  $t_R = 9.892$  min (major),  $t_R = 11.098$  min (minor),  $[\alpha]_D^{25} = -13.491$  (CH<sub>2</sub>Cl<sub>2</sub>,  $c = 1.1$  g/100mL, CH<sub>2</sub>Cl<sub>2</sub> for 96:4 *er*); **IR (neat)**  $\nu_{\max}$  3356, 1801, 1728, 1138, and 756 cm<sup>-1</sup>; **<sup>1</sup>H NMR (400 MHz, DMSO-D<sub>6</sub>)**  $\delta$  8.09 (1H, dd,  $J = 7.6, 1.0$  Hz), 7.46 (1H, dd,  $J = 8.2, 1.7$  Hz), 7.34 – 7.24 (2H, m), 7.07 – 7.02 (5H, m), 6.97 (1H, d,  $J = 1.7$  Hz), 6.81 (1H, dd,  $J = 7.8, 0.9$  Hz), 6.69 (1H, d,  $J = 8.2$  Hz), 5.26 (1H, d,  $J = 10.7$  Hz), 5.11 (1H, d,  $J = 8.4$  Hz), 5.08 – 4.98 (1H, m), 3.01 (3H, s); **<sup>13</sup>C NMR (100 MHz, DMSO-D<sub>6</sub>, DEPT-135)**  $\delta$  174.9 (C, C-C=O), 172.4 (C, N-C=O), 152.2 (C), 143.9 (C), 139.1 (C), 134.9 (CH), 133.0 (C), 130.9 (CH), 128.8 (2CH), 128.7 (2CH), 128.5 (CH), 128.0 (CH), 126.6 (CF<sub>3</sub>, q,  $J = 287$  Hz), 125.7 (C), 124.2 (CH), 123.3 (C), 111.2 (2CH, d,  $J = 3$  Hz), 84.4 (C), 72.4 (C), 66.7 (C), 60.3 (CH, q,  $J = 30$  Hz), 50.8 (CH), 26.5 (CH<sub>3</sub>);

**<sup>19</sup>F NMR (376MHz, DMSO-D<sub>6</sub>)** δ -70.66; **HRMS (ESI)** m/z: 613.0206 [M + Na]<sup>+</sup>, calcd for C<sub>26</sub>H<sub>18</sub>O<sub>3</sub>N<sub>2</sub>F<sub>3</sub>Na; Found 613.0194.

**(2'R,3R,4'S,5'S)-5''-methoxy-1''-methyl-4'-phenyl-5'-(trifluoromethyl)-2H-dispiro[benzofuran-3,3'-pyrrolidine-2',3''-indoline]-2,2''-dione (4b')**:

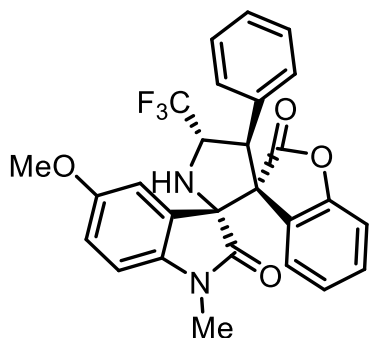

Prepared by following general procedure **C** purified by column chromatography using hexane - Ethyl acetate and isolated product **4b'** in 96% yield as a white solid with M. P. 236 - 238 °C; The enantiomeric ratio (*er*) was determined by chiral stationary phase HPLC using a DAICEL IC column (hexane/EtOAc = 80:20, flow rate 0.5 mL/min, λ = 254 nm), *t<sub>R</sub>* = 12.904 min (major), *t<sub>R</sub>* = 15.651 min (minor), [α]<sub>D</sub><sup>25</sup> = -83.825 (CH<sub>2</sub>Cl<sub>2</sub>, c = 0.8 g/100mL, CH<sub>2</sub>Cl<sub>2</sub> for 98:2 *er*); IR (neat) ν<sub>max</sub> 3020, 1801, 1720, 1215, and 748 cm<sup>-1</sup>; **<sup>1</sup>H NMR**

**(400 MHz, CDCl<sub>3</sub>)** δ 7.83 (1H, dd, *J* = 7.6, 1.0 Hz), 7.34 (1H, td, *J* = 7.6, 1.0 Hz), 7.28 – 7.26 (1H, m), 7.12 – 7.06 (5H, m), 6.75 (1H, d, *J* = 7.9 Hz), 6.70 (1H, dd, *J* = 8.5, 2.5 Hz), 6.60 (1H, d, *J* = 8.5 Hz), 6.37 (1H, d, *J* = 2.5 Hz), 5.62 (1H, d, *J* = 10.6 Hz), 4.90 (1H, t, *J* = 7.1 Hz), 3.45 (3H, s), 3.19 (3H, s), 2.85 (1H, s); **<sup>13</sup>C NMR (100 MHz, CDCl<sub>3</sub>, DEPT-135)** δ 175.9 (C, C-C=O), 171.9 (C, N-C=O), 155.2 (C), 152.9 (C), 137.5 (C), 132.0 (CH), 130.4 (CH), 128.4 (CH), 128.3 (CH), 128.1 (CH), 126.6 (CH), 125.5 (CF<sub>3</sub>, q, *J* = 280 Hz), 125.1 (C), 123.8 (C), 123.4 (CH), 115.7 (CH), 112.4 (C), 112.4 (CH), 111.6 (CH), 108.7 (CH), 108.7 (C), 71.7 (C), 66.2 (C), 60.8 (CH, q, *J* = 31 Hz), 55.7 (CH<sub>3</sub>), 50.6 (CH), 26.5 (CH<sub>3</sub>, d, *J* = 2 Hz); **<sup>19</sup>F NMR (376MHz, CDCl<sub>3</sub>)** δ -71.43; **HRMS (ESI)** m/z: 517.1346 [M + Na]<sup>+</sup>, calcd for C<sub>27</sub>H<sub>21</sub>O<sub>4</sub>N<sub>2</sub>F<sub>3</sub>Na; Found 517.1332.

**(2'R,3R,4'S,5'S)-1''-methyl-4'-phenyl-5'-(trifluoromethoxy)-5'-(trifluoromethyl)-2H-dispiro[benzofuran-3,3'-pyrrolidine-2',3''-indoline]-2,2''-dione (4c')**:

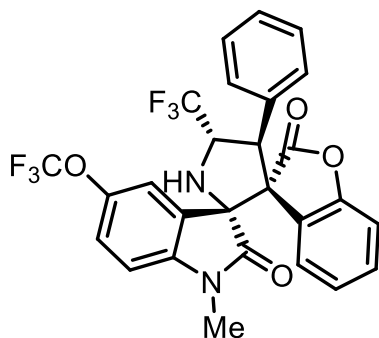

Prepared by following general procedure **C** purified by column chromatography using hexane - Ethyl acetate and isolated product **4c'** in 94% yield as a white solid with M. P. 248 - 250 °C; The enantiomeric ratio (*er*) was determined by chiral stationary phase HPLC using a DAICEL IC column (hexane/EtOAc = 80:20, flow rate 0.5 mL/min, λ = 254 nm), *t<sub>R</sub>* = 8.334 min (major), *t<sub>R</sub>* = 8.964 min (minor), [α]<sub>D</sub><sup>25</sup> = -157.792 (CH<sub>2</sub>Cl<sub>2</sub>, c = 0.7 g/100mL, CH<sub>2</sub>Cl<sub>2</sub> for 98:2 *er*); IR (neat) ν<sub>max</sub> 1789, 1728, 1462, 1219, 1134, and 756 cm<sup>-1</sup>;

**<sup>1</sup>H NMR (400 MHz, CDCl<sub>3</sub>)** δ 7.83 (1H, dd, *J* = 7.6, 1.0 Hz), 7.37 (1H, td, *J* = 7.6, 0.9 Hz), 7.29 (1H, td, *J* = 7.9, 1.4 Hz), 7.16 – 7.05 (6H, m), 6.77 (1H, d, *J* = 7.9 Hz), 6.72 – 6.70 (2H, m), 5.56 (1H, d, *J* = 10.7 Hz), 4.96 – 4.88 (1H, m), 3.24 (3H, s), 2.89 (1H, br s); **<sup>13</sup>C NMR (100 MHz, CDCl<sub>3</sub>, DEPT-135)** δ 176.1 (C, C-C=O), 171.9 (C, N-C=O), 152.8 (C), 143.8 (C), 142.7 (C), 131.7 (C), 130.8 (CH), 128.4 (4CH), 128.3 (CH), 126.3 (CH), 125.6 (C), 125.4 (CF<sub>3</sub>, q, *J* = 279 Hz), 123.8 (CH), 123.7 (CH), 123.1 (C), 120.2 (OCF<sub>3</sub>, d, *J* = 255 Hz), 119.7 (CH), 111.6 (CH), 108.6 (CH), 71.5 (C), 66.2 (C), 60.8 (CH, q,

$J = 31$  Hz), 50.5 (CH), 26.6 (CH<sub>3</sub>); **<sup>19</sup>F NMR (376MHz, CDCl<sub>3</sub>)**  $\delta$  -58.68, -71.50; **HRMS (ESI)**  $m/z$ : 571.1063 [M + Na]<sup>+</sup>, calcd for C<sub>27</sub>H<sub>18</sub>O<sub>4</sub>N<sub>2</sub>F<sub>6</sub>Na; Found 571.1058.

**(2'R,3R,4'S,5'S)-5''-chloro-1'',7''-dimethyl-4'-phenyl-5'-(trifluoromethyl)-2H-dispiro[benzofuran-3,3'-pyrrolidine-2',3''-indoline]-2,2''-dione (4d')**:

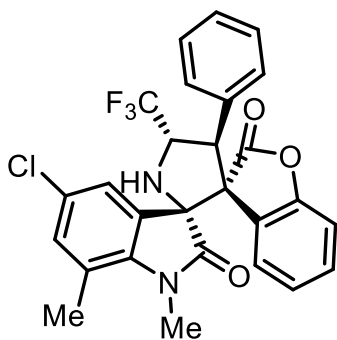

Prepared by following general procedure **C** purified by column chromatography using hexane - Ethyl acetate and isolated product **4d'** in 98% yield as a white solid with M. P. 250 - 252 °C; The enantiomeric ratio (*er*) was determined by chiral stationary phase HPLC using a DAICEL IC column (hexane/EtOAc = 80:20, flow rate 0.5 mL/min,  $\lambda = 254$  nm),  $t_R = 9.783$  min (major),  $t_R = 11.759$  min (minor),  $[\alpha]_D^{25} = -92.698$  (CH<sub>2</sub>Cl<sub>2</sub>,  $c = 1.0$  g/100mL, CH<sub>2</sub>Cl<sub>2</sub> for 97:3 *er*); IR (neat)  $\nu_{\max}$  3383, 1786, 1739, 1462, 1087 and 702 cm<sup>-1</sup>; **<sup>1</sup>H NMR (400 MHz, CDCl<sub>3</sub>)**  $\delta$

7.78 (1H, dd,  $J = 7.6, 1.0$  Hz), 7.34 (1H, td,  $J = 7.5, 1.0$  Hz), 7.27 (1H, td,  $J = 7.9, 1.4$  Hz), 7.13 – 7.04 (5H, m), 6.88 (1H, d,  $J = 1.6$  Hz), 6.75 (1H, d,  $J = 7.9$  Hz), 6.65 (1H, d,  $J = 2.1$  Hz), 5.54 (1H, d,  $J = 10.7$  Hz), 4.92 – 4.84 (1H, m), 3.48 (3H, s), 2.80 (1H, d,  $J = 4.2$  Hz), 2.45 (3H, s); **<sup>13</sup>C NMR (100 MHz, CDCl<sub>3</sub>, DEPT-135)**  $\delta$  176.8 (C, C-C=O), 171.9 (C, N-C=O), 152.8 (C), 140.4 (C), 133.6 (CH), 131.8 (C), 130.6 (CH), 128.4 (2CH), 128.3 (2CH), 128.2 (CH), 126.7 (C), 126.6 (CH), 126.4 (C), 125.4 (CF<sub>3</sub>, q,  $J = 279$  Hz), 123.8 (CH), 123.6 (CH), 123.2 (C), 121.2 (C), 111.6 (CH), 71.0 (C), 66.4 (C), 60.7 (CH, q,  $J = 31$  Hz), 50.6 (CH), 29.9 (CH<sub>3</sub>), 18.9 (CH<sub>3</sub>); **<sup>19</sup>F NMR (376MHz, CDCl<sub>3</sub>)**  $\delta$  -71.52; **HRMS (ESI)**  $m/z$ : 535.1007 [M + Na]<sup>+</sup>, calcd for C<sub>27</sub>H<sub>20</sub>O<sub>3</sub>N<sub>2</sub>F<sub>3</sub>ClNa; Found 535.0993.

**(2'R,3R,4'S,5'S)-1''-benzyl-4'-phenyl-5'-(trifluoromethyl)-2H-dispiro[benzofuran-3,3'-pyrrolidine-2',3''-indoline]-2,2''-dione (4f')**:

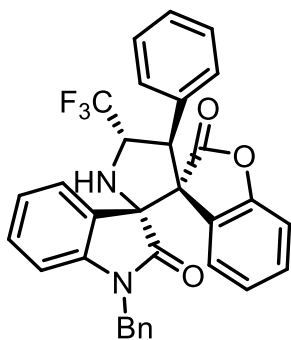

Prepared by following general procedure **C** purified by column chromatography using hexane - Ethyl acetate and isolated product **4f'** in 83% yield as a white solid with M. P. 136 - 138 °C; The enantiomeric ratio (*er*) was determined by chiral stationary phase HPLC using a DAICEL IC column (hexane/EtOAc = 80:20, flow rate 0.5 mL/min,  $\lambda = 254$  nm),  $t_R = 8.786$  min (major),  $t_R = 9.376$  min (minor),  $[\alpha]_D^{25} = -127.093$  (CH<sub>2</sub>Cl<sub>2</sub>,  $c = 0.9$  g/100mL, CH<sub>2</sub>Cl<sub>2</sub> for 88:12 *er*); IR (neat)  $\nu_{\max}$  3341, 1801, 1724, 1130, and 752 cm<sup>-1</sup>; **<sup>1</sup>H NMR (400 MHz, CDCl<sub>3</sub>)**  $\delta$  7.82 (1H, d,  $J = 7.4$  Hz), 7.41 – 7.06

(6H, m), 7.23 (1H, td,  $J = 7.8, 1.0$  Hz), 7.14 – 7.06 (5H, m), 7.03 (1H, td,  $J = 7.7, 1.0$  Hz), 6.75 (2H, q,  $J = 9.0$  Hz), 6.60 (1H, t,  $J = 7.6$  Hz), 6.56 (1H, d,  $J = 6.6$  Hz), 5.69 (1H, d,  $J = 10.7$  Hz), 5.25 (1H, d,  $J = 15.6$  Hz), 4.97 – 4.89 (1H, m), 4.60 (1H, d,  $J = 15.6$  Hz), 2.92 (1H, s); **<sup>13</sup>C NMR (100 MHz, CDCl<sub>3</sub>, DEPT-135)**  $\delta$  176.2 (C, C-C=O), 172.2 (C, N-C=O), 152.9 (C), 143.7 (C), 135.4 (C), 131.9 (CH), 130.4 (CH), 130.4 (CH), 128.8 (2CH), 128.4 (2CH), 128.3 (2CH), 128.1 (CH), 127.7 (2CH), 127.7 (CH), 126.6 (CH), 125.6 (CF<sub>3</sub>, q,  $J = 279$  Hz), 125.5 (CH), 124.1 (C), 123.7 (C), 123.5 (CH), 121.9 (CH), 111.5 (CH),

109.5 (CH), 71.4 (C), 66.2 (C), 60.7 (CH, q,  $J = 31$  Hz), 51.0 (CH), 44.7 (CH<sub>2</sub>); **<sup>19</sup>F NMR (376MHz, CDCl<sub>3</sub>)**  $\delta$  -71.51; **HRMS (ESI)**  $m/z$ : 563.1553 [M + Na]<sup>+</sup>, calcd for C<sub>32</sub>H<sub>23</sub>O<sub>3</sub>N<sub>2</sub>F<sub>3</sub>Na; Found 563.1541.

**(2'R,3R,4'S,5'S)-1''-(4-bromobenzyl)-4'-phenyl-5'-(trifluoromethyl)-2H-dispiro[benzofuran-3,3'-pyrrolidine-2',3''-indoline]-2,2''-dione (4g')**:

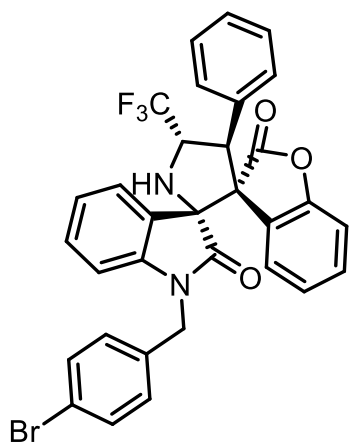

Prepared by following general procedure **C** purified by column chromatography using hexane - Ethyl acetate and isolated product **4g'** in 86% yield as a white solid with M. P. 147 - 149 °C; The enantiomeric ratio (*er*) was determined by chiral stationary phase HPLC using a DAICEL IC column (hexane/EtOAc = 90:10, flow rate 0.5 mL/min,  $\lambda = 254$  nm),  $t_R = 16.552$  min (major),  $t_R = 18.943$  min (minor),  $[\alpha]_D^{25} = -123.699$  (CH<sub>2</sub>Cl<sub>2</sub>,  $c = 0.7$  g/100mL, CH<sub>2</sub>Cl<sub>2</sub> for 90:10 *er*); IR (neat)  $\nu_{\max}$  3371, 1801, 1720, 1161, and 752 cm<sup>-1</sup>; **<sup>1</sup>H NMR (400 MHz, CDCl<sub>3</sub>)**  $\delta$  7.81 (1H, d,  $J = 7.4$  Hz), 7.48 (2H, d,  $J = 8.4$  Hz), 7.34 – 7.23 (4H, m), 7.12 – 7.02 (6H, m), 6.77 (1H, d,  $J = 7.6$  Hz), 6.73 (1H, d,  $J = 7.9$  Hz), 6.62 (1H, t,  $J = 7.7$  Hz), 6.51 (1H, d,  $J = 7.8$  Hz), 5.66 (1H, d,  $J = 10.7$  Hz), 5.22 (1H, d,  $J = 15.7$  Hz), 4.97 – 4.88 (1H, m), 4.50 (1H, d,  $J = 15.7$  Hz), 2.91 (1H, m); **<sup>13</sup>C NMR (100 MHz, CDCl<sub>3</sub>, DEPT-135)**  $\delta$  176.2 (C, C-C=O), 172.2 (C, N-C=O), 152.8 (C), 143.4 (C), 134.5 (C), 131.9 (2CH), 131.9 (C), 130.5 (2CH, d,  $J = 5$  Hz), 129.5 (2CH), 128.4 (2CH), 128.3 (2CH), 128.2 (CH), 126.5 (CH), 125.6 (CH), 125.5 (CF<sub>3</sub>, q,  $J = 279$  Hz), 124.0 (C), 123.6 (C), 123.6 (CH), 122.1 (CH), 121.7 (C), 111.6 (CH), 109.2 (CH), 71.4 (C), 66.2 (C), 60.7 (CH, q,  $J = 30$  Hz), 51.0 (CH), 44.1 (CH<sub>2</sub>); **<sup>19</sup>F NMR (376MHz, CDCl<sub>3</sub>)**  $\delta$  -71.57; **HRMS (ESI)**  $m/z$ : 641.0658 [M + Na]<sup>+</sup>, calcd for C<sub>32</sub>H<sub>22</sub>O<sub>3</sub>N<sub>2</sub>F<sub>3</sub>BrNa; Found 641.0638.

**(2'R,3R,4'S,5'S)-1''-(4-methylbenzyl)-4'-phenyl-5'-(trifluoromethyl)-2H-dispiro[benzofuran-3,3'-pyrrolidine-2',3''-indoline]-2,2''-dione (4h')**:

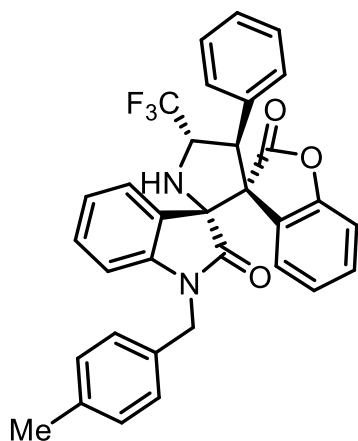

Prepared by following general procedure **C** purified by column chromatography using hexane - Ethyl acetate and isolated product **4h'** in 84% yield as a white solid with M. P. 138 - 140 °C; The enantiomeric ratio (*er*) was determined by chiral stationary phase HPLC using a DAICEL IC column (hexane/EtOAc = 90:10, flow rate 0.5 mL/min,  $\lambda = 254$  nm),  $t_R = 18.136$  min (major),  $t_R = 23.715$  min (minor),  $[\alpha]_D^{25} = -111.292$  (CH<sub>2</sub>Cl<sub>2</sub>,  $c = 0.9$  g/100mL, CH<sub>2</sub>Cl<sub>2</sub> for 86:14 *er*); IR (neat)  $\nu_{\max}$  2924, 1801, 1728, 1215, and 748 cm<sup>-1</sup>; **<sup>1</sup>H NMR (400 MHz, CDCl<sub>3</sub>)**  $\delta$  7.99 (1H, dd,  $J = 7.5, 0.6$  Hz), 7.50 – 7.46 (3H, m), 7.40 (1H, td,  $J = 7.7, 1.2$  Hz), 7.33 (2H, d,  $J = 7.9$  Hz), 7.28 – 7.22 (5H, m), 7.18 (1H, td,  $J = 7.7, 1.0$  Hz), 6.92 (1H, d,  $J = 7.4$  Hz), 6.88 (1H, d,  $J = 7.7$  Hz), 6.75 (2H, d,  $J = 8.8$  Hz), 5.87 (1H, d,  $J = 10.7$  Hz), 5.37 (1H, d,  $J = 15.4$  Hz), 5.15 – 5.06 (1H, m), 4.72 (1H, d,  $J = 15.4$  Hz), 3.10 (1H, d,  $J = 3.8$  Hz), 2.47 (3H, s); **<sup>13</sup>C NMR (100 MHz, CDCl<sub>3</sub>, DEPT-135)**  $\delta$  176.1 (C, C-C=O), 172.1 (C, N-C=O), 152.8 (C), 143.7 (C), 137.4 (C), 132.4 (C), 132.0 (C), 130.4 (CH), 130.4 (CH), 129.5 (2CH), 128.5

(2CH), 128.1 (CH), 127.8 (2CH), 126.6 (CH), 125.6 (CF<sub>3</sub>, q, *J* = 279 Hz), 125.4 (C), 123.7 (C), 123.5 (CH), 121.9 (CH), 111.5 (CH), 109.5 (CH), 71.4 (C), 66.2 (C), 60.7 (CH, q, *J* = 31 Hz), 51.0 (CH), 44.4 (CH<sub>2</sub>), 21.1 (CH<sub>3</sub>); **<sup>19</sup>F NMR (376MHz, CDCl<sub>3</sub>)** δ -71.51; **HRMS (ESI)** *m/z*: 577.1709 [M + Na]<sup>+</sup>, calcd for C<sub>33</sub>H<sub>25</sub>O<sub>3</sub>N<sub>2</sub>F<sub>3</sub>Na; Found 577.1692.

**(2'R,3R,4'S,5'S)-4'-phenyl-1''-(prop-2-yn-1-yl)-5'-(trifluoromethyl)-2H-dispiro[benzofuran-3,3'-pyrrolidine-2',3''-indoline]-2,2''-dione (4i')**:

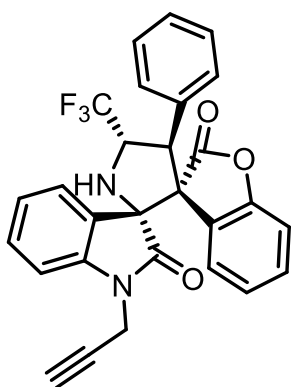

Prepared by following general procedure **C** purified by column chromatography using hexane - Ethyl acetate and isolated product **4i'** in 63% yield as a white solid with M. P. 212 - 214 °C; [ $\alpha$ ]<sub>D</sub><sup>25</sup> = -129.584 (CH<sub>2</sub>Cl<sub>2</sub>, *c* = 0.8 g/100mL); **IR (neat)**  $\nu_{\text{max}}$  3302, 1797, 1728, 1130, and 752 cm<sup>-1</sup>; **<sup>1</sup>H NMR (400 MHz, CDCl<sub>3</sub>)** δ 7.81 (1H, dd, *J* = 7.5, 1.0 Hz), 7.32 (1H, td, *J* = 7.6, 1.0 Hz), 7.24 (1H, dd, *J* = 7.8 Hz), 7.20 (1H, td, *J* = 7.7, 1.2 Hz), 7.13 – 7.03 (5H, m), 6.94 (1H, d, *J* = 7.7 Hz), 6.81 (1H, dd, *J* = 7.6, 0.7 Hz), 6.70 (2H, qd, *J* = 7.8, 0.8 Hz), 5.55 (1H, d, *J* = 10.7 Hz), 4.92 – 4.87 (1H, m), 4.55 (2H, qd, *J* = 18.4, 2.5 Hz), 2.87 (1H, d, *J* = 4.4 Hz), 2.25 (1H, t, *J* = 2.5 Hz);

**<sup>13</sup>C NMR (100 MHz, CDCl<sub>3</sub>, DEPT-135)** δ 175.2 (C, C-C=O), 171.9 (C, N-C=O), 152.9 (C), 142.2 (C), 131.9 (C), 130.4 (2CH), 130.4 (C), 128.4 (2CH), 128.3 (2CH), 128.1 (CH), 126.6 (2CH), 125.3 (CF<sub>3</sub>, q, *J* = 279 Hz), 125.1 (CH), 123.6 (C), 123.5 (CH), 122.2 (CH), 111.5 (CH), 109.4 (CH), 72.7 (C), 71.4 (C), 66.3 (C), 60.7 (CH, q, *J* = 31 Hz), 50.7 (CH), 29.6 (CH<sub>2</sub>); **<sup>19</sup>F NMR (376MHz, CDCl<sub>3</sub>)** δ -71.58; **HRMS (ESI)** *m/z*: 511.1240 [M + Na]<sup>+</sup>, calcd for C<sub>28</sub>H<sub>19</sub>O<sub>3</sub>N<sub>2</sub>F<sub>3</sub>Na; Found 511.1235.

**(2'R,3R,4'S,5'S)-4'-phenyl-5'-(trifluoromethyl)-1''-trityl-2H-dispiro[benzofuran-3,3'-pyrrolidine-2',3''-indoline]-2,2''-dione (4j')**:

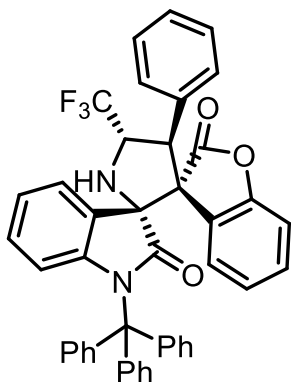

Prepared by following general procedure **C** purified by column chromatography using hexane - Ethyl acetate and isolated product **4j'** in 43% yield as a white solid with M. P. 182 - 184 °C; [ $\alpha$ ]<sub>D</sub><sup>25</sup> = -71.300 (CH<sub>2</sub>Cl<sub>2</sub>, *c* = 1.0 g/100mL); **IR (neat)**  $\nu_{\text{max}}$  2924, 1805, 1739, 1141, and 752 cm<sup>-1</sup>; **<sup>1</sup>H NMR (400 MHz, CDCl<sub>3</sub>)** δ 7.75 – 7.73 (1H, m), 7.51 (6H, d, *J* = 7.6 Hz), 7.31 – 7.27 (8H, m), 7.24 – 7.20 (3H, m), 7.13 – 7.07 (5H, m), 6.84 – 6.79 (2H, m), 6.73 (1H, td, *J* = 8.7, 1.2 Hz), 6.51 (1H, t, *J* = 7.6 Hz), 6.26 (1H, d, *J* = 8.2 Hz), 5.36 (1H, d, *J* = 10.7 Hz), 4.92 – 4.86 (1H, m), 2.72 (1H, br s); **<sup>13</sup>C NMR (100 MHz, CDCl<sub>3</sub>, DEPT-135)** δ 177.8 (C, C-C=O), 172.8 (C, N-C=O),

153.0 (C), 153.0 (C), 144.1 (C), 144.0 (C), 142.2 (C), 132.2 (C), 132.2 (C), 130.2 (CH), 129.5 (6C), 128.5 (CH), 128.5 (2CH), 128.2 (2CH), 128.0 (CH), 127.6 (6CH), 127.0 (CH), 126.8 (3ch), 124.9 (CH), 125.4 (CF<sub>3</sub>, q, *J* = 279 Hz), 123.6 (C), 123.4 (CH), 121.2 (CH), 116.4 (CH), 111.5 (CH), 75.5 (C), 71.4 (C), 66.5 (C), 60.8 (CH, q, *J* = 31 Hz), 51.1 (CH); **<sup>19</sup>F NMR (376MHz, CDCl<sub>3</sub>)** δ -70.84; **HRMS (ESI)** *m/z*: 715.2179 [M + Na]<sup>+</sup>, calcd for C<sub>44</sub>H<sub>31</sub>O<sub>3</sub>N<sub>2</sub>F<sub>3</sub>Na; Found 715.2158.



**(2'R,3R,4'R,5'S)-4'-(2-chlorophenyl)-1'-hydroxy-1''-methyl-5'-(trifluoromethyl)-2H-dispiro[benzofuran-3,3'-pyrrolidine-2',3''-indoline]-2,2''-dione (5d):**

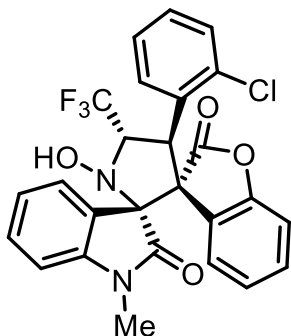

Prepared by following general procedure **E** purified by column chromatography using hexane - Ethyl acetate and isolated product **5d** in 51% yield as a white solid with M. P. 230 - 231 °C;  $[\alpha]_D^{25} = -80.500$  ( $\text{CH}_2\text{Cl}_2$ ,  $c = 0.006$  g/100mL); IR (neat)  $\nu_{\text{max}}$  3398, 2920, 1724, 1462, and 756  $\text{cm}^{-1}$ ;  $^1\text{H}$  NMR (400 MHz,  $\text{CDCl}_3$ )  $\delta$  7.68 (1H, dd,  $J = 8.0, 1.4$  Hz), 7.60 (1H, dd,  $J = 7.7, 0.7$  Hz), 7.56 (1H, dd,  $J = 7.7, 1.0$  Hz), 7.22 – 7.19 (1H, m), 7.18 – 7.11 (2H, m), 7.08 – 7.03 (2H, m), 7.01 – 6.93 (2H, m), 6.59 (1H, d,  $J = 7.6$  Hz), 6.53 (1H, d,  $J = 7.8$  Hz), 6.09 (1H, d,  $J = 11.9$  Hz), 5.64 (1H, s), 5.34 – 5.27 (1H, m), 3.01 (3H, s);  $^{13}\text{C}$  NMR (100 MHz,  $\text{CDCl}_3$ , DEPT-135)  $\delta$  174.3 (C, C-C=O), 173.5 (C, N-C=O), 153.3 (C), 144.1 (C), 135.6 (C), 130.7 (2CH), 130.6 (2CH), 130.4 (CH), 130.2 (CH), 129.8 (C), 129.5 (CH), 129.3 (CH), 127.3 (CH), 126.6 (CH), 125.4 (CF<sub>3</sub>, q,  $J = 278$  Hz), 123.9 (CH), 122.9 (CH), 120.4 (C), 120.3 (C), 110.4 (CH), 108.1 (CH), 72.6 (CH, q,  $J = 29$  Hz), 41.9 (CH), 26.0 (CH<sub>3</sub>);  $^{19}\text{F}$  NMR (376MHz,  $\text{CDCl}_3$ )  $\delta$  -70.41; HRMS (ESI)  $m/z$ : 537.0799  $[\text{M} + \text{Na}]^+$ , calcd for  $\text{C}_{26}\text{H}_{18}\text{O}_4\text{N}_2\text{F}_3\text{ClNa}$ ; Found 537.0789.

**ethyl(E)-N-((4-acetamidophenyl)sulfonyl)-3-((2'R,3R,4'S,5'S)-2,2''-dioxo-4'-phenyl-5'-(trifluoromethyl)-2H-dispiro[benzofuran-3,3'-pyrrolidine-2',3''-indolin]-1''-yl)propanimide (7i'):**

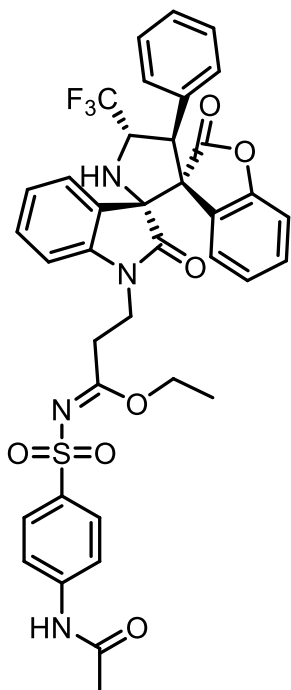

Prepared by following general procedure **F** purified by column chromatography using hexane - Ethyl acetate and isolated product **7i'** in 87% yield as a white solid with M. P. 148 - 150 °C;  $[\alpha]_D^{25} = -33.714$  ( $\text{CHCl}_3$ ,  $c = 0.004$  g/100mL); IR (neat)  $\nu_{\text{max}}$  2924, 2852, 1801, 1591, and 732  $\text{cm}^{-1}$ ;  $^1\text{H}$  NMR (400 MHz,  $\text{CDCl}_3$ )  $\delta$  7.85 (1H, dd,  $J = 7.6, 1.0$  Hz), 7.81 (2H, dd,  $J = 6.9, 1.8$  Hz), 7.61 (2H, d,  $J = 8.2$  Hz), 7.46 (1H, s), 7.32 (1H, td,  $J = 1.0$  Hz), 7.24 (1H, td,  $J = 7.8, 1.3$  Hz), 7.18 (1H, td,  $J = 7.7, 1.1$  Hz), 7.11 – 7.04 (5H, m), 6.93 (1H, d,  $J = 7.8$  Hz), 6.79 (1H, dd,  $J = 7.7, 0.9$  Hz), 6.71 (1H, dd,  $J = 7.9, 0.6$  Hz), 6.65 (1H, td,  $J = 7.6, 0.8$  Hz), 5.57 (1H, d,  $J = 10.6$  Hz), 4.92 – 4.83 (1H, m), 4.22 – 4.06 (4H, m), 3.38 – 3.30 (1H, m), 3.20 – 3.13 (1H, m), 3.10 (1H, d,  $J = 4.8$  Hz), 2.21 (3H, s), 1.22 (3H, t,  $J = 7.1$  Hz);  $^{13}\text{C}$  NMR (100 MHz,  $\text{CDCl}_3$ , DEPT-135)  $\delta$  176.1 (C, C-C=O), 173.1 (C, N-C=O), 172.2 (C, N-C=O), 168.6 (C), 152.8 (C), 142.8 (C), 141.6 (C), 136.5 (C), 132.1 (C), 130.6 (CH), 130.3 (2CH), 128.4 (2CH), 128.2 (CH), 128.1 (3CH), 127.9 (CH), 126.8 (CH), 125.7 (CH), 125.6 (CF<sub>3</sub>, d,  $J = 281$  Hz), 124.2 (C), 123.7 (C), 123.5 (CH), 122.0 (CH), 119.2 (CH), 111.3 (CH), 108.6 (CH), 71.2 (C), 66.2 (C), 65.2 (CH<sub>2</sub>), 60.7 (CH, q,  $J = 31$  Hz), 50.8 (CH), 36.9 (CH<sub>2</sub>), 31.9 (CH<sub>2</sub>), 24.8 (CH<sub>3</sub>), 13.5 (CH<sub>3</sub>);  $^{19}\text{F}$  NMR (376MHz,  $\text{CDCl}_3$ )  $\delta$  -71.41; HRMS (ESI)  $m/z$ : 769.1914  $[\text{M} + \text{Na}]^+$ , calcd for  $\text{C}_{38}\text{H}_{33}\text{O}_7\text{N}_4\text{F}_3\text{NaS}$ ; Found 769.1893.

## SC-XRD DATA

| Crystallographic Data and Structure Refinements Summary of (-)-4d'    |                                                                                    |
|-----------------------------------------------------------------------|------------------------------------------------------------------------------------|
| Molecular Structure<br>(ball & stick Diagram)<br>for compound (-)-4d' | 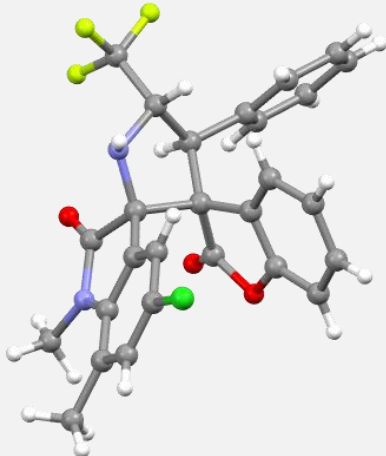 |
| CCDC number                                                           | CCDC 2388791                                                                       |
| Empirical formula                                                     | C <sub>27</sub> H <sub>20</sub> ClF <sub>3</sub> N <sub>2</sub> O <sub>3</sub>     |
| Formula weight                                                        | 512.90                                                                             |
| Temperature                                                           | 297.0 K                                                                            |
| Wavelength                                                            | 0.71073 Å                                                                          |
| Crystal system                                                        | orthorhombic                                                                       |
| space group                                                           | P 2 <sub>1</sub> 2 <sub>1</sub> 2 <sub>1</sub>                                     |
| a                                                                     | 6.8332 (9) Å                                                                       |
| b                                                                     | 16.149 (2) Å                                                                       |
|                                                                       |                                                                                    |

|                                                      |                                                                          |
|------------------------------------------------------|--------------------------------------------------------------------------|
| <b>c</b>                                             | 21.497 (3) Å                                                             |
| <b>a</b>                                             | 90°                                                                      |
| <b>b</b>                                             | 90°                                                                      |
| <b>g</b>                                             | 90°                                                                      |
| <b>Volume</b>                                        | 2372.1(5) Å <sup>3</sup>                                                 |
| <b>Z</b>                                             | 4                                                                        |
| <b>Calculated density</b>                            | 1.436 g/cm <sup>3</sup>                                                  |
| <b>Absorption coefficient, <math>\mu</math></b>      | 0.218 mm <sup>-1</sup>                                                   |
| <b>F (000)</b>                                       | 1056.0                                                                   |
| <b>Crystal size</b>                                  | 0.36 X 0.26 X 0.26 mm <sup>3</sup>                                       |
| <b><math>\theta</math> range for data collection</b> | 4.55° to 56.61°                                                          |
| <b>Limiting indices</b>                              | -9 ≤ h ≤ 9, -21 ≤ k ≤ 21, -28 ≤ l ≤ 28                                   |
| <b>Reflections collected / unique</b>                | 81429 / 5878 [ $R_{\text{int}} = 0.0643$ , $R_{\text{sigma}} = 0.0275$ ] |
| <b>Completeness to <math>\theta</math> =</b>         | 28.30 99.8 %                                                             |
| <b>Absorption correction</b>                         | Multi-scan                                                               |
|                                                      |                                                                          |

|                                         |                                  |
|-----------------------------------------|----------------------------------|
| <b>Max. and min. transmission</b>       | -                                |
| <b>Refinement method</b>                | SHELXL 2013/1 (Sheldrick, 2015)' |
| <b>Data/restraints / parameters</b>     | 5878 / 0/ 332                    |
| <b>Goodness-of-fit on F<sup>2</sup></b> | 1.028                            |
| <b>Final R indices [I&gt;2sigma(I)]</b> | R1 = 0.0377                      |
| <b>R indices (all data)</b>             | R1 = 0.0532                      |
| <b>Absolute structure parameter</b>     | 0.01 (3)                         |
| <b>Extinction coefficient</b>           | n/a                              |
| <b>Largest diff. peak and hole</b>      | 0.18 and -0.24 e.Å <sup>-3</sup> |

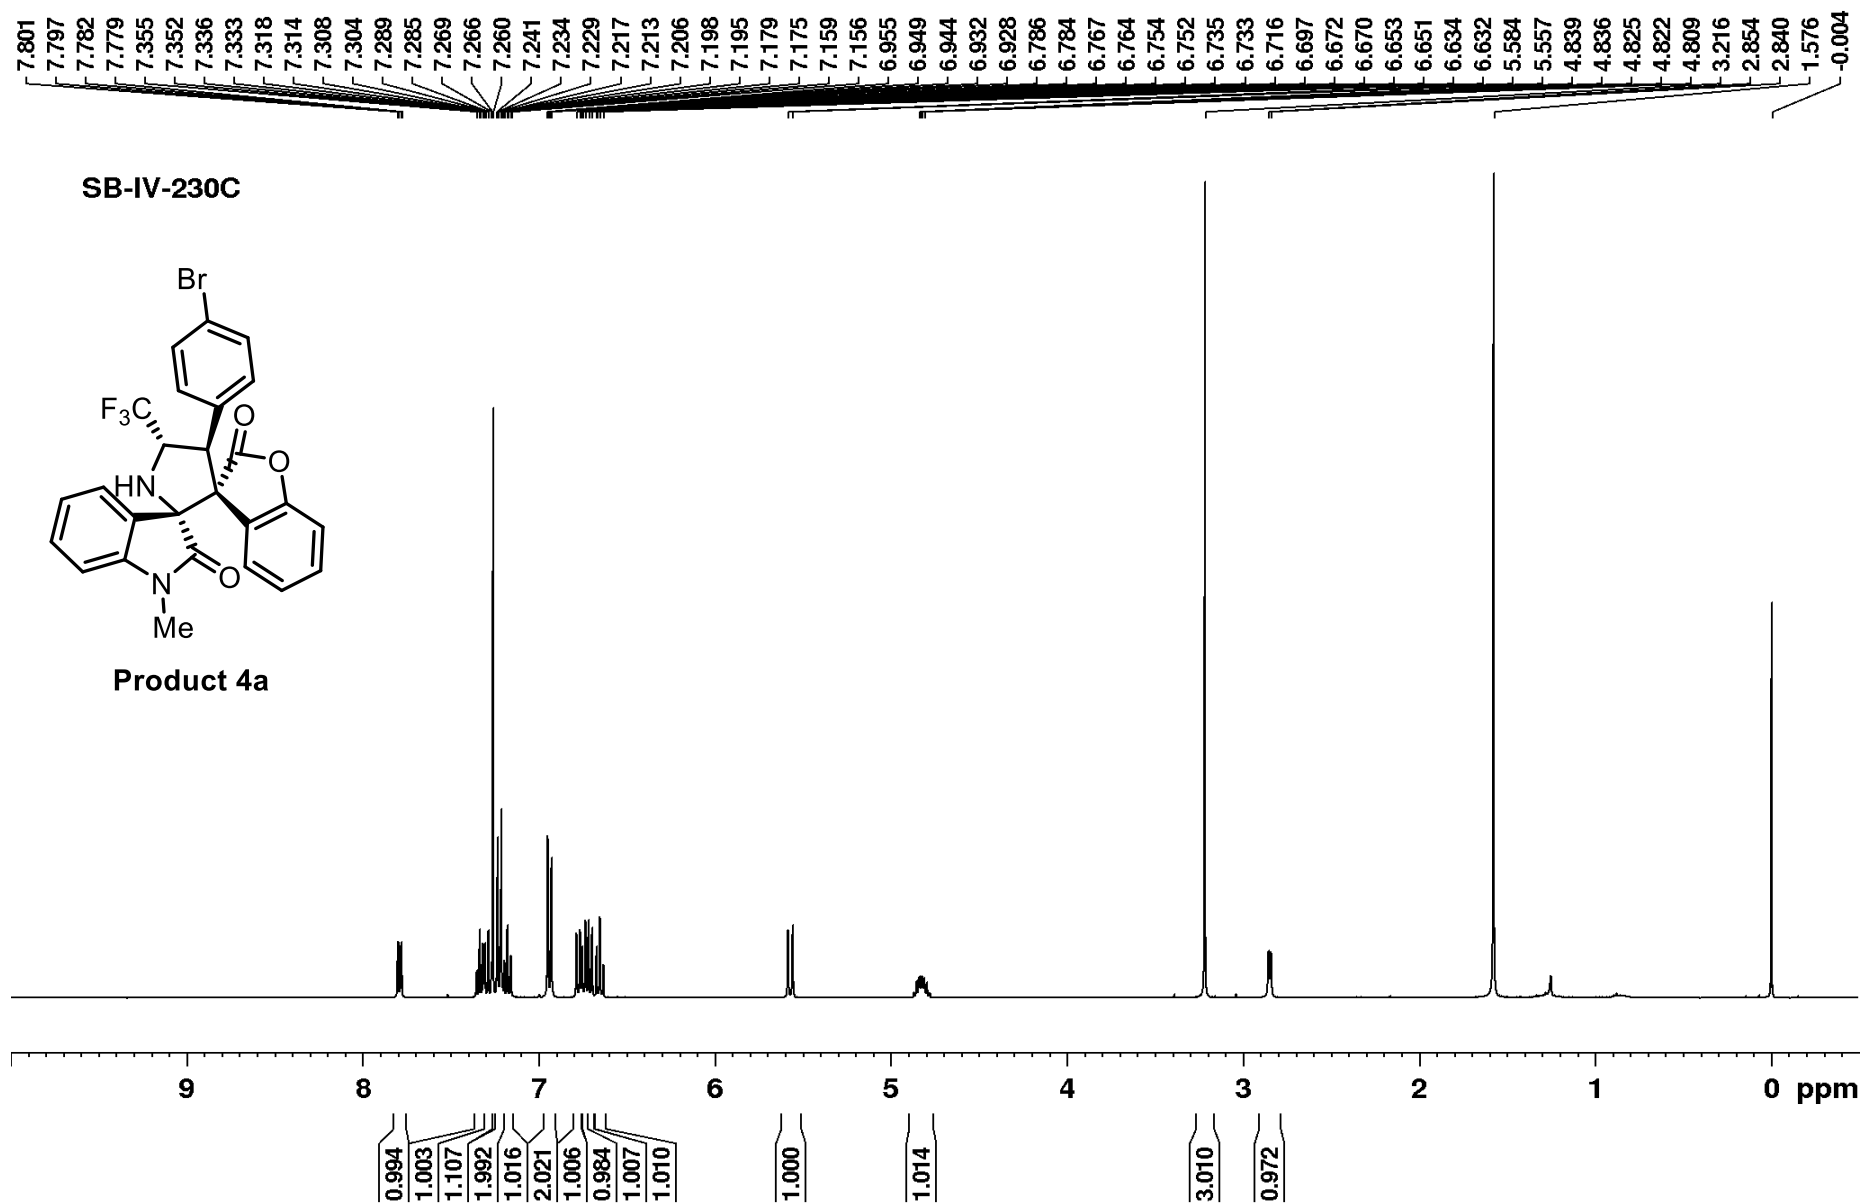

SB-IV-230C

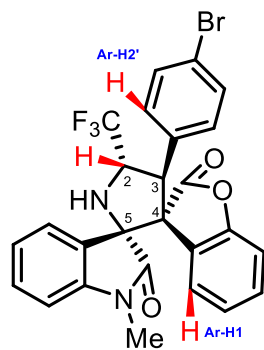

Product 4a

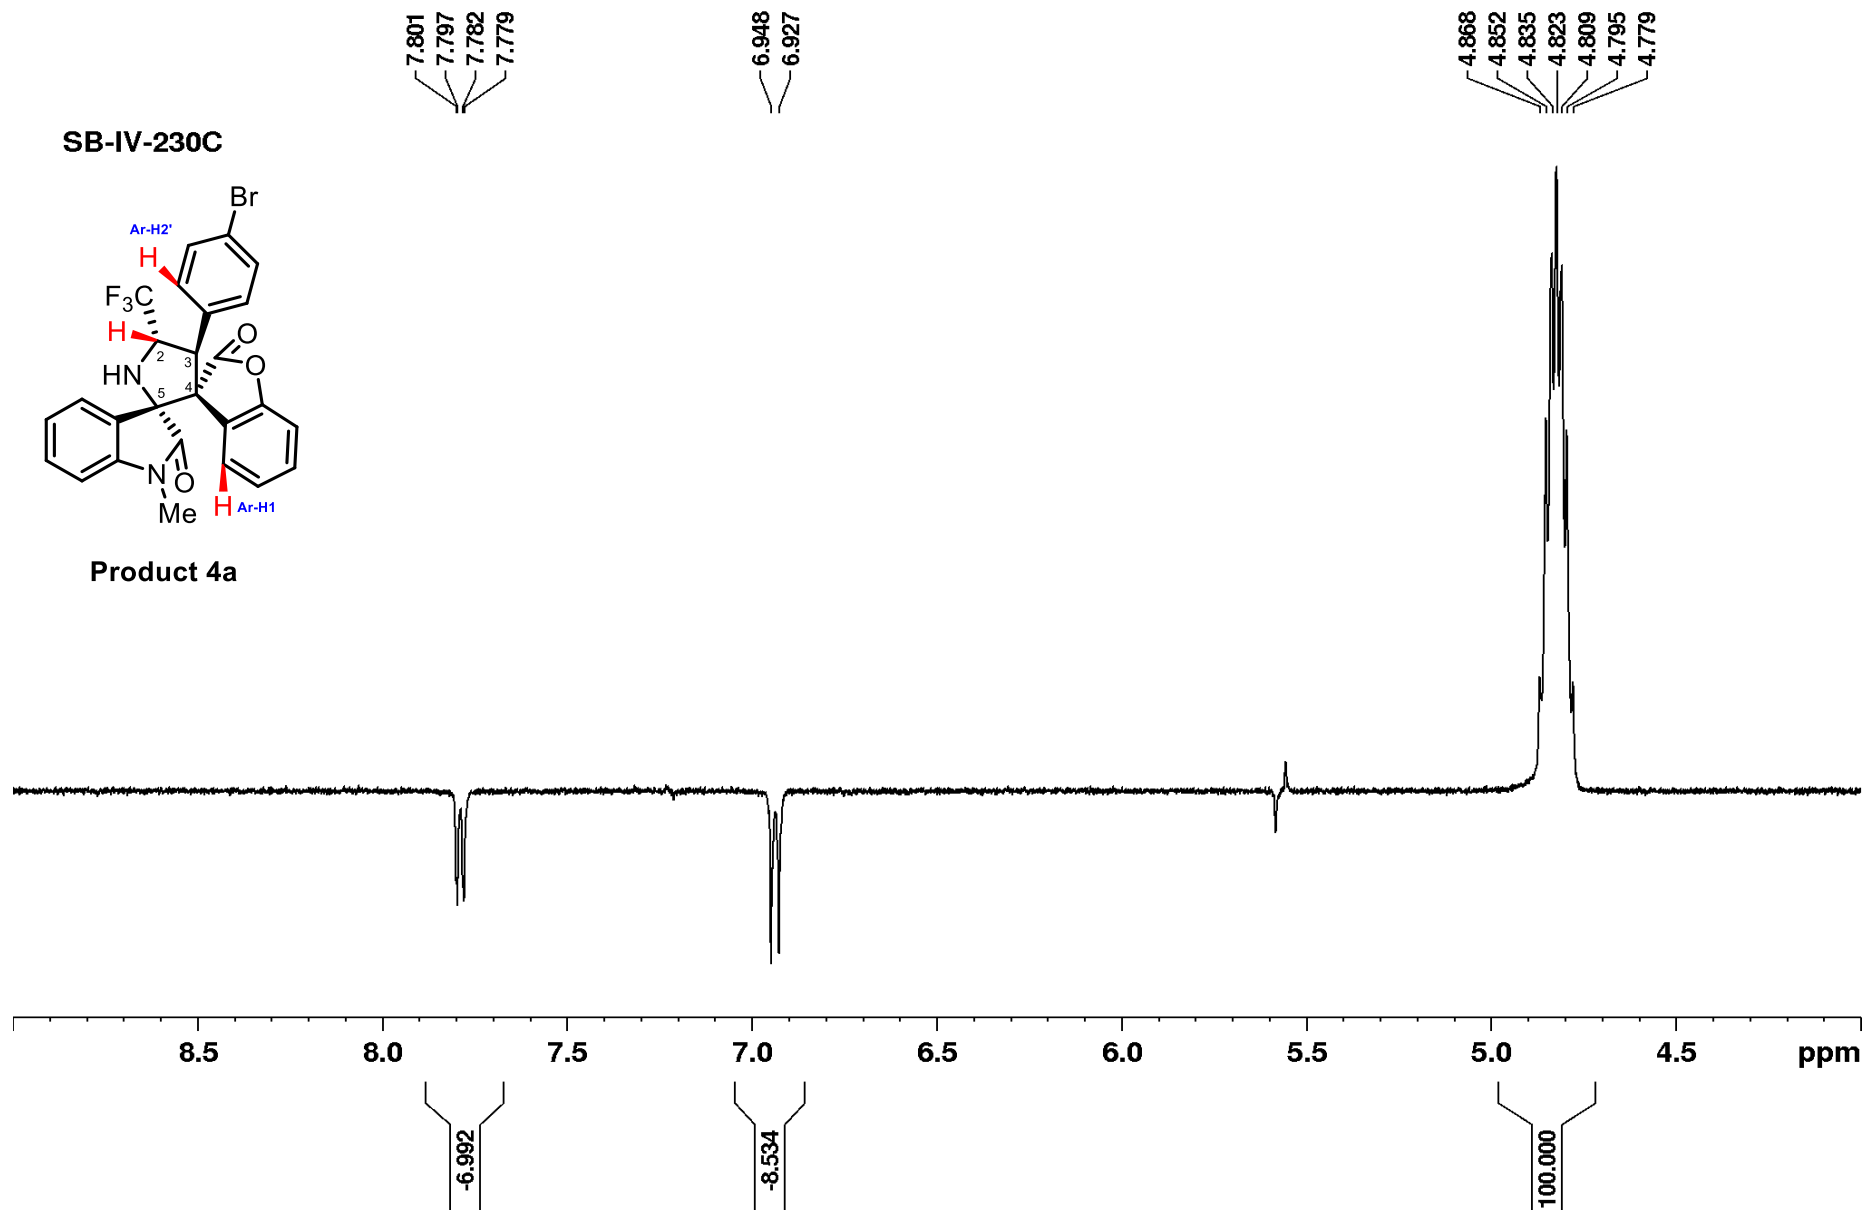

SB-IV-230C

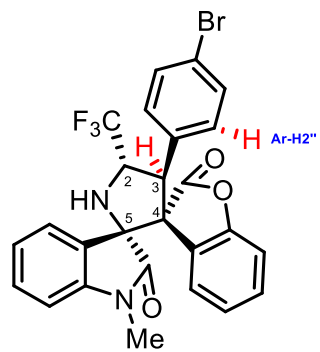

Product 4a

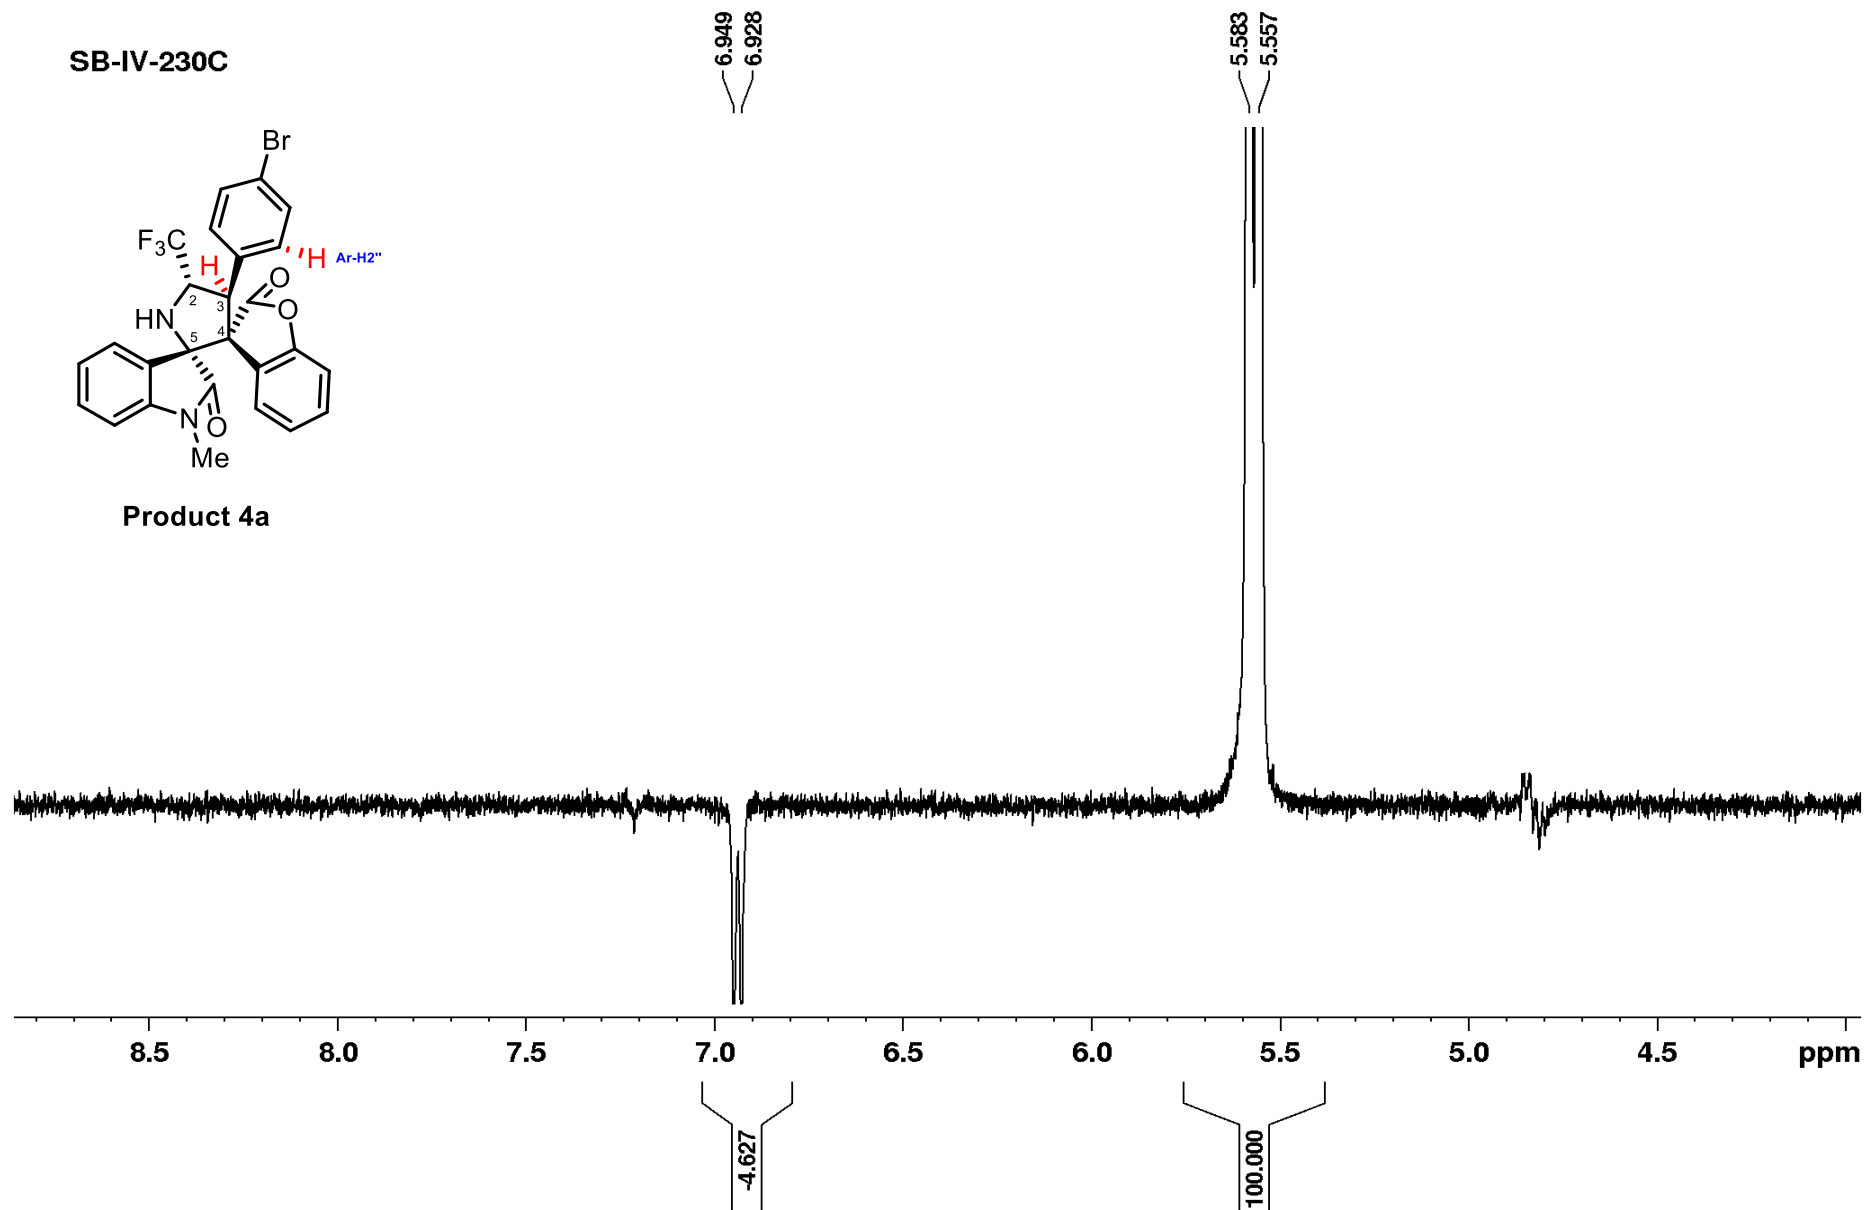





**SB-IV-230C**

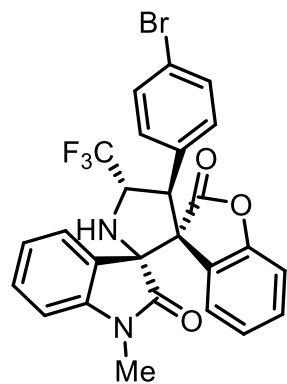

**Product 4a**

— -71.61

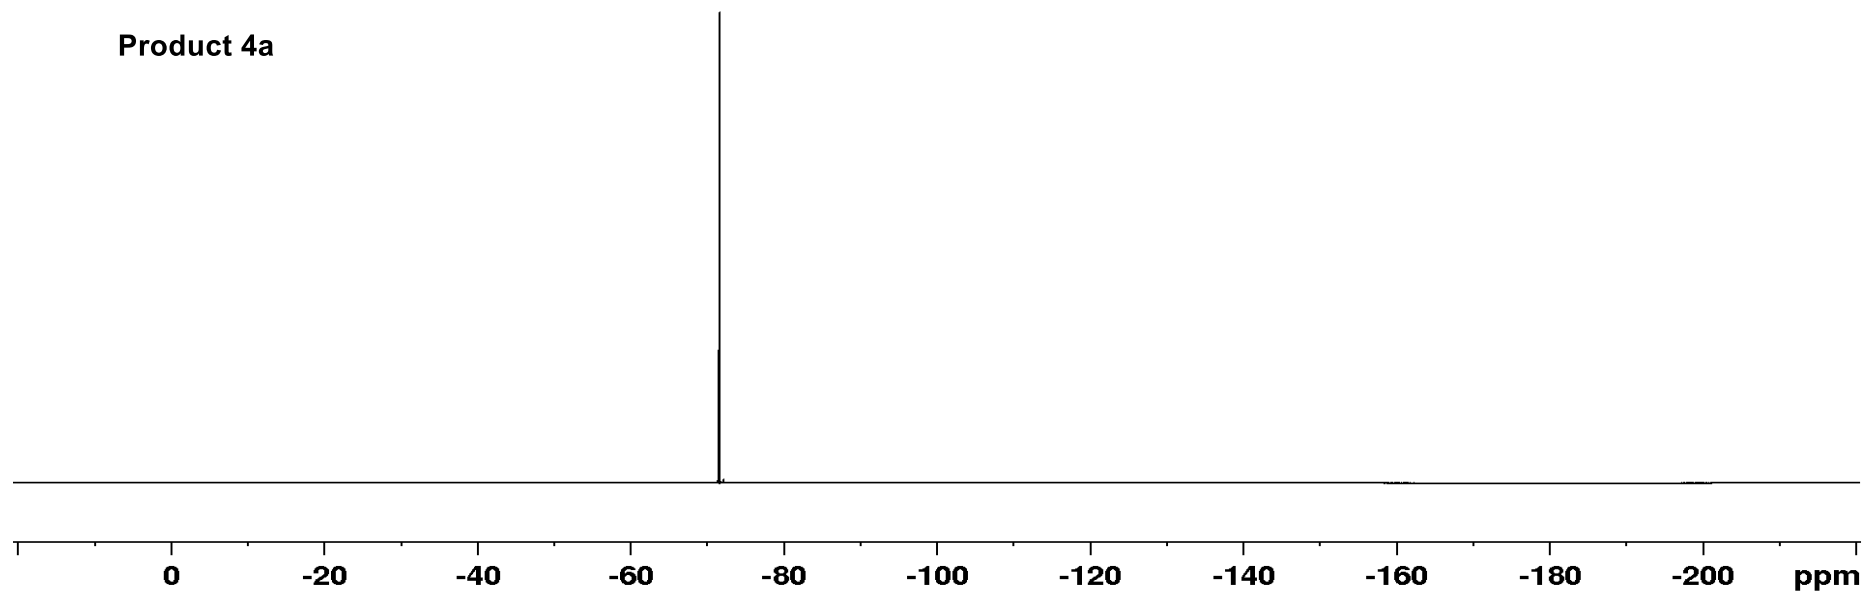

SB-IV-230C

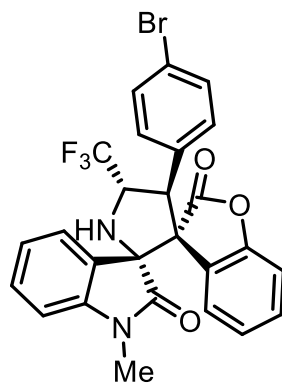

Product 4a

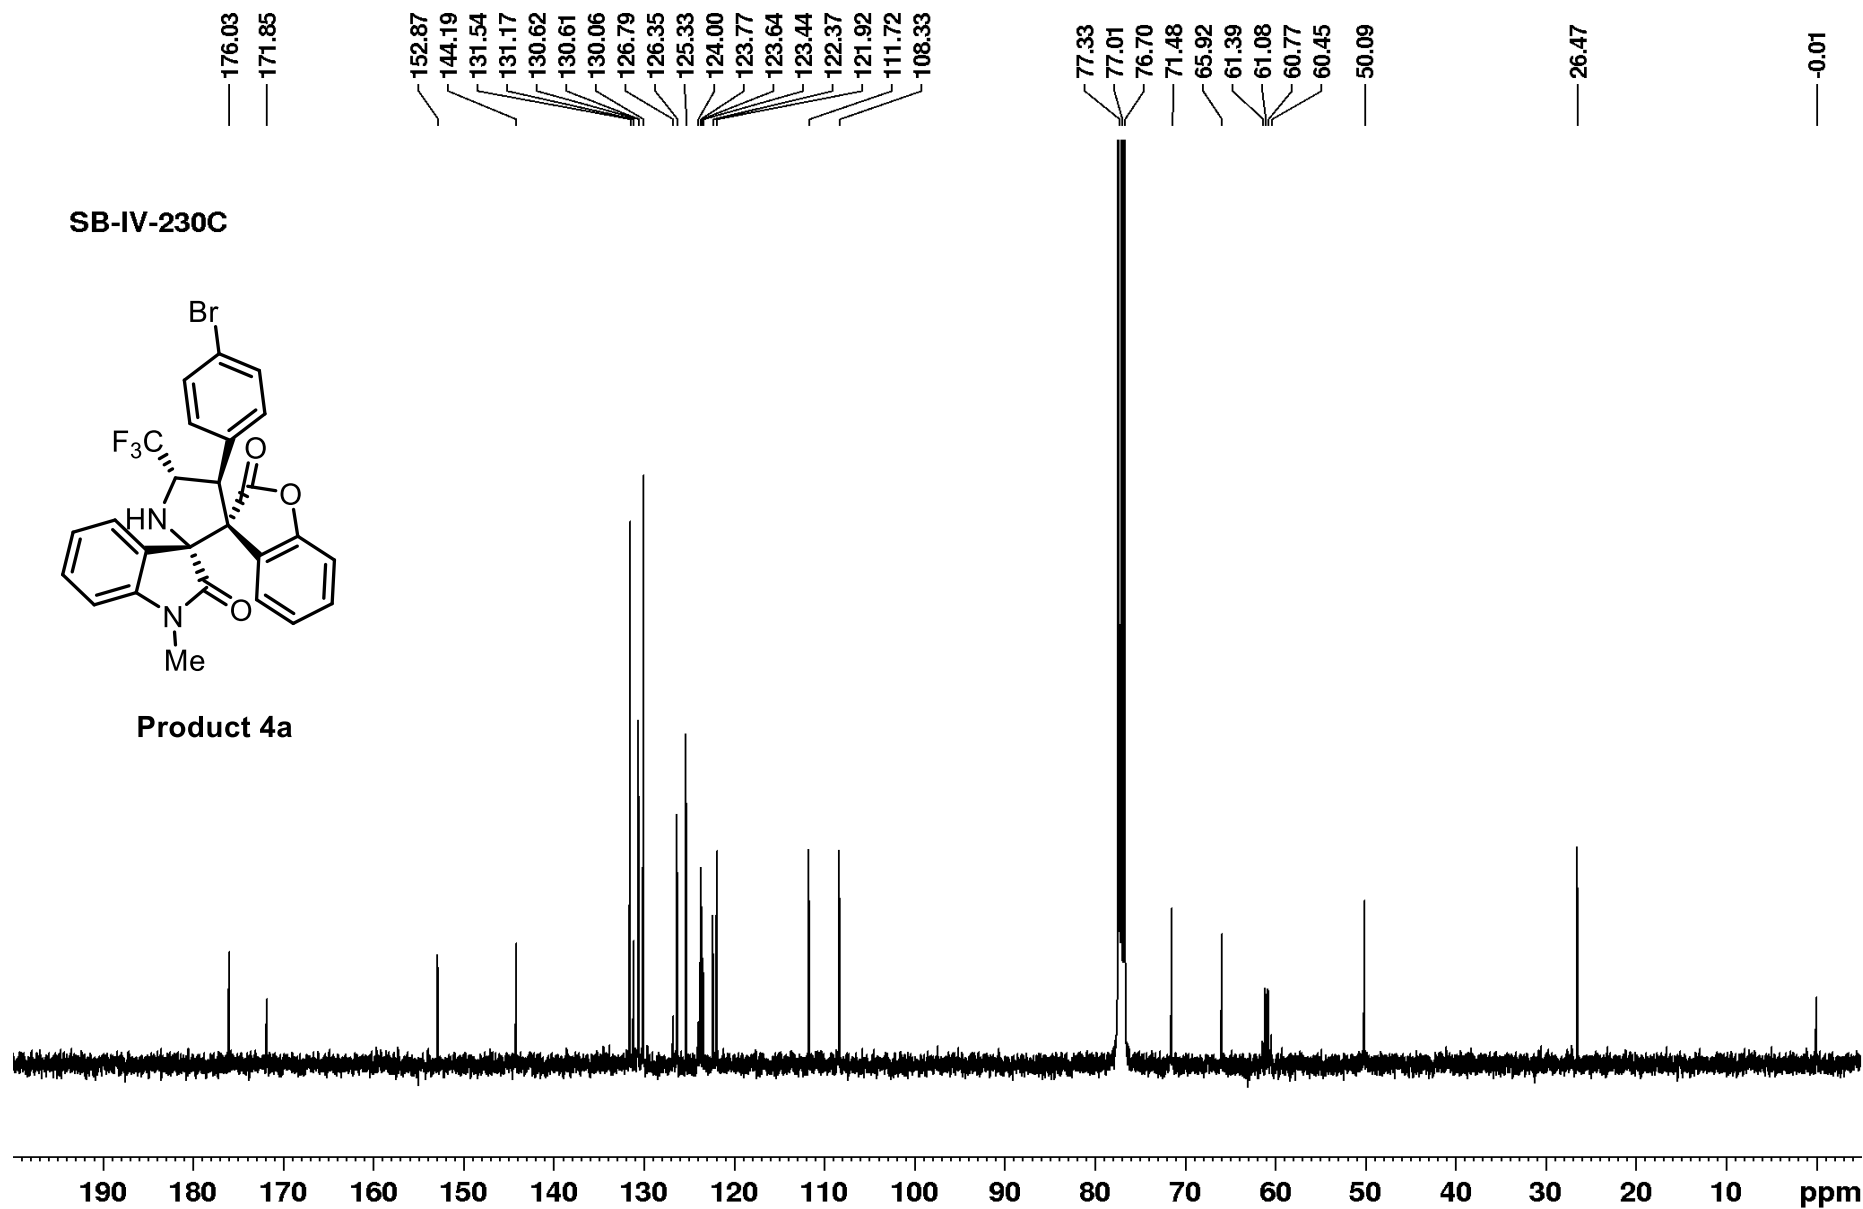

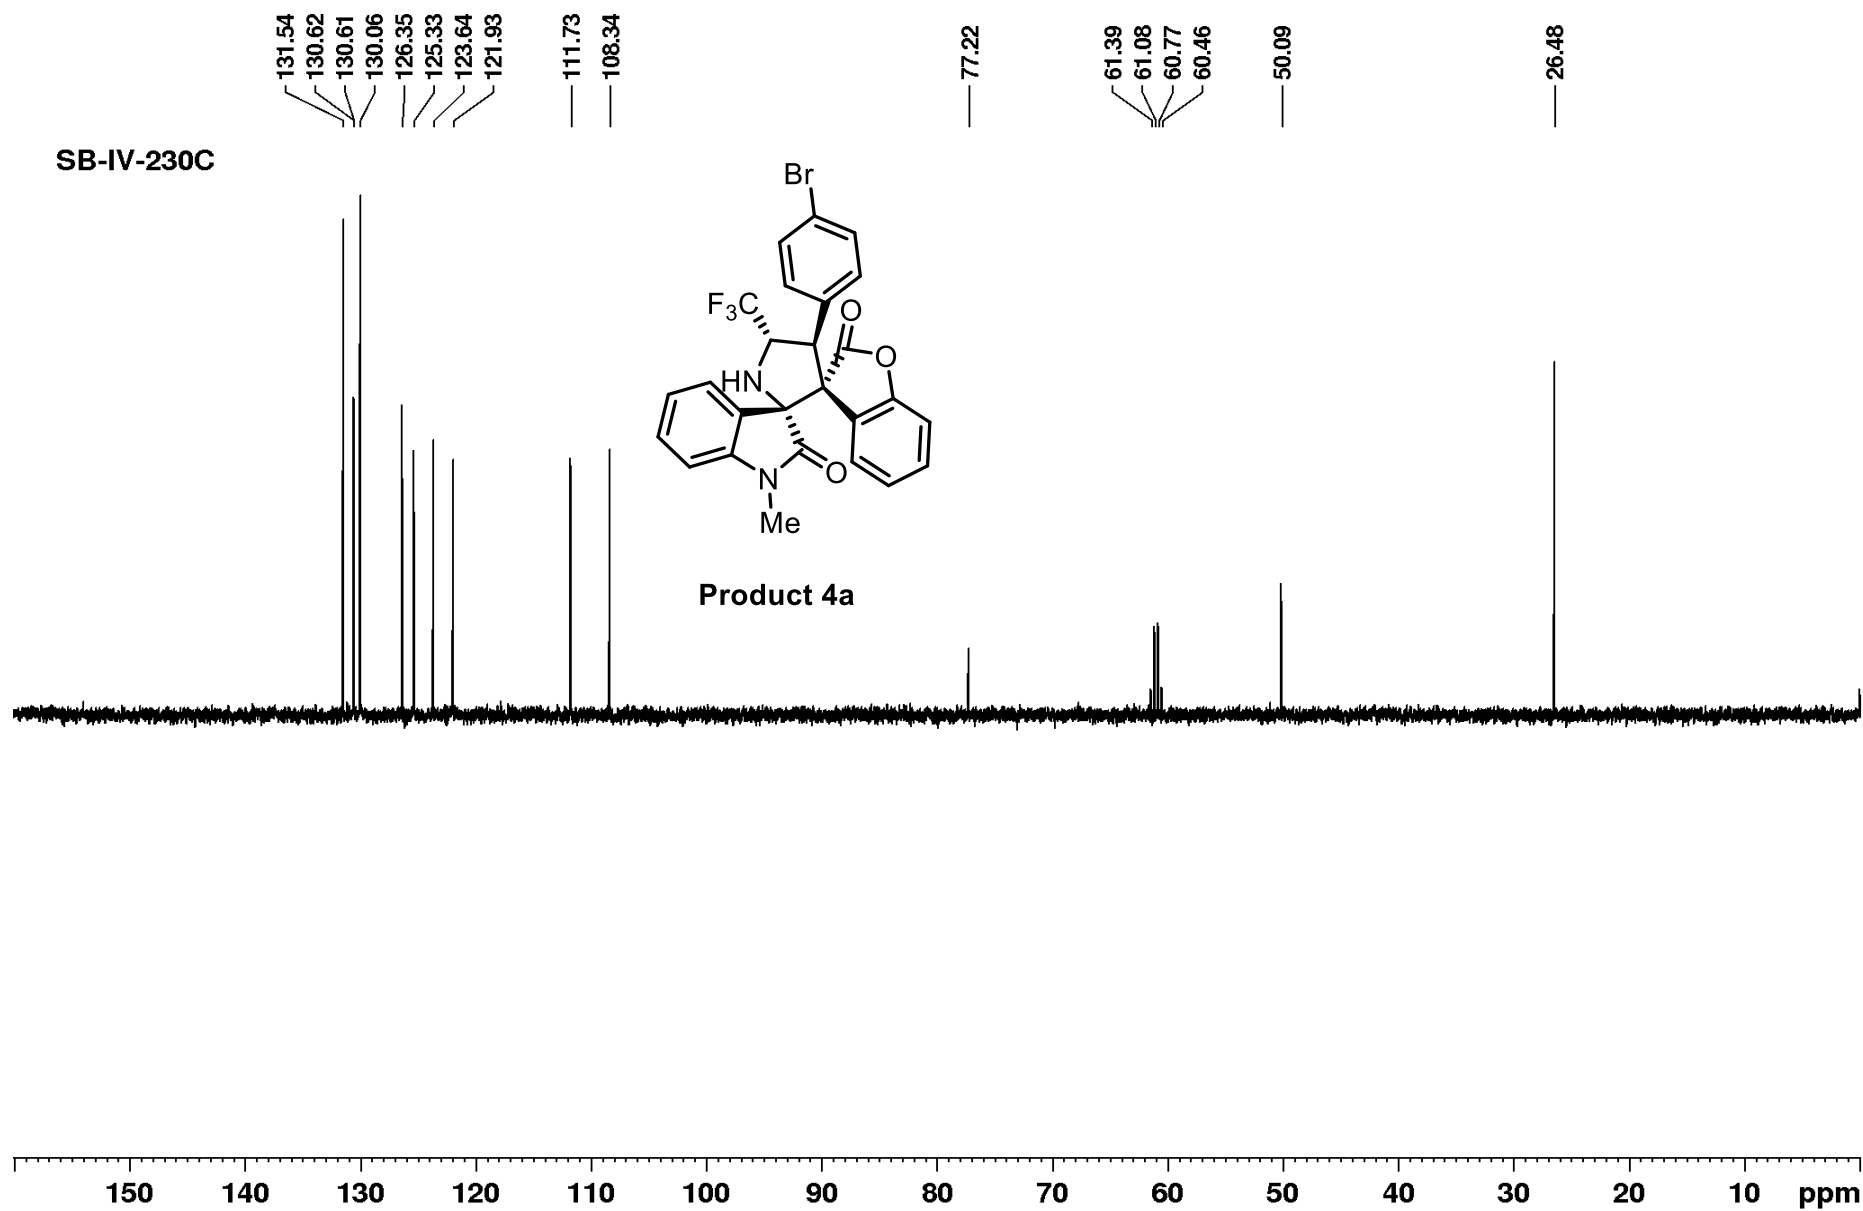

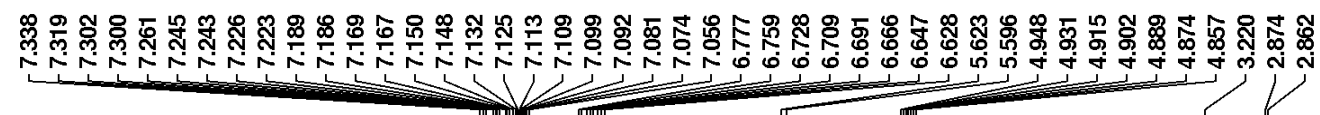

SB-IV-233

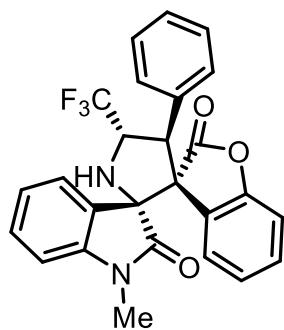

Product 4b

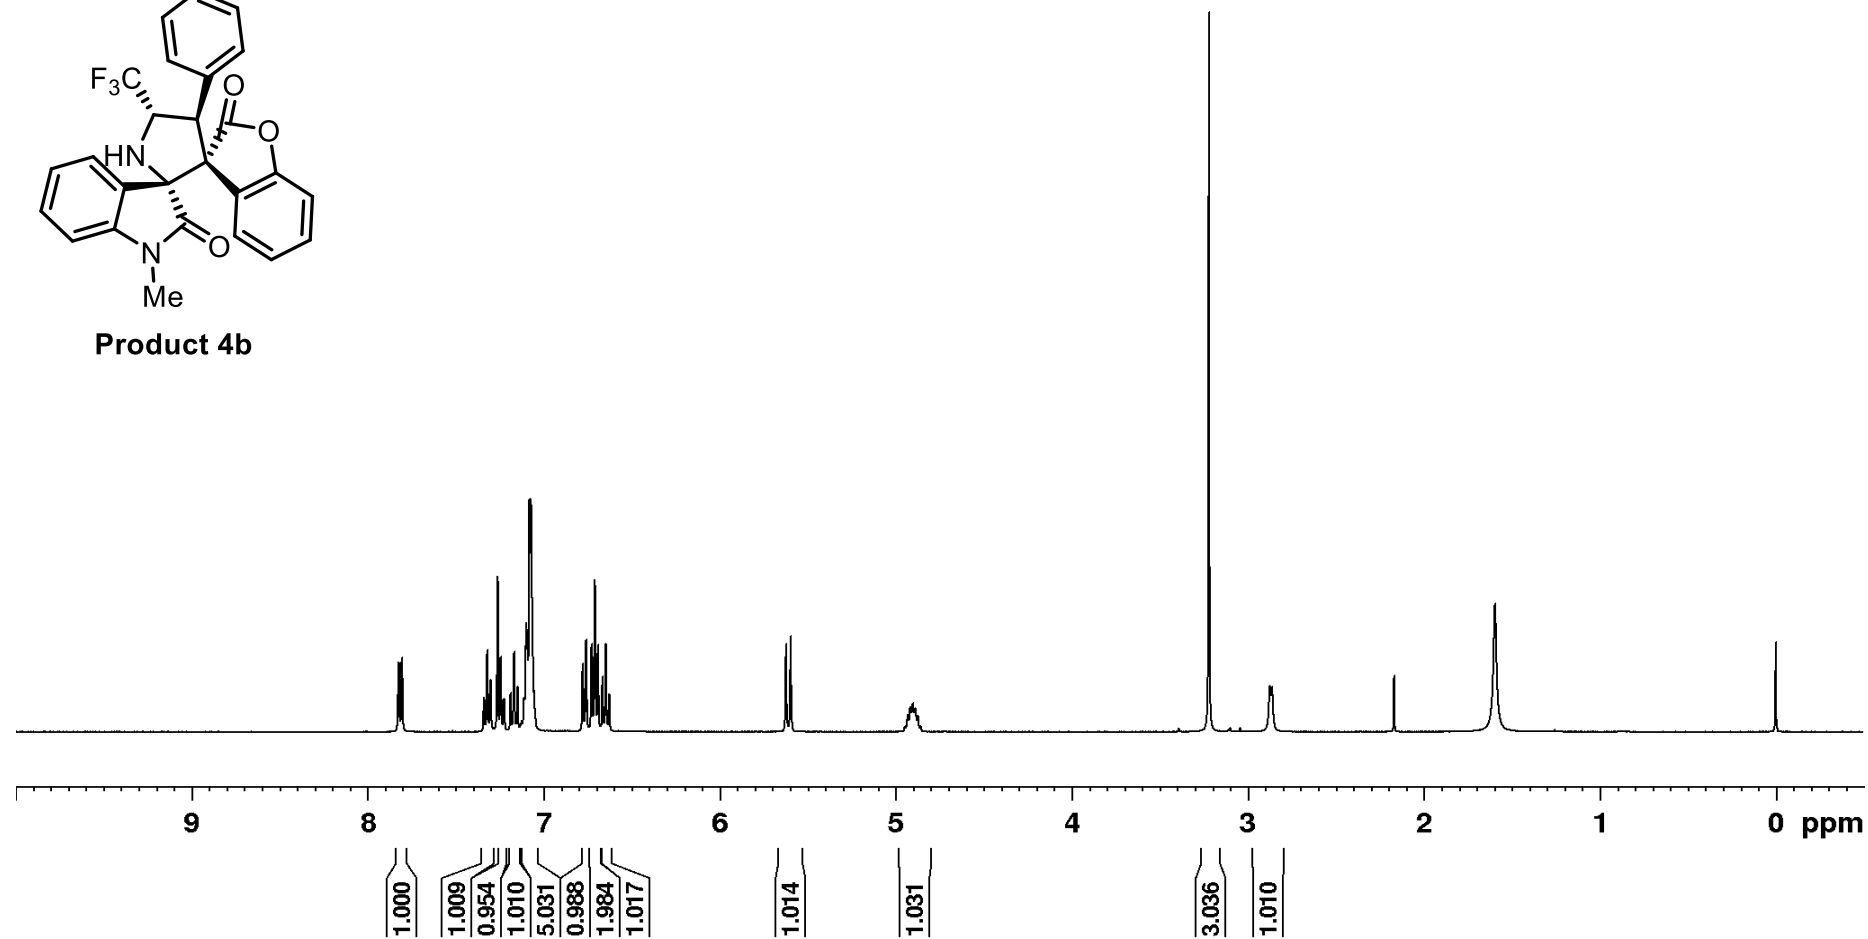

**SB-IV-233**

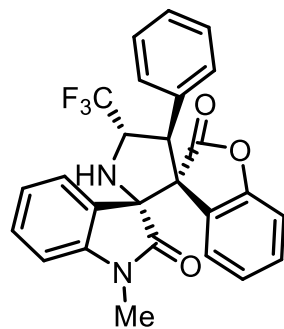

**Product 4b**

-71.52  
-71.54

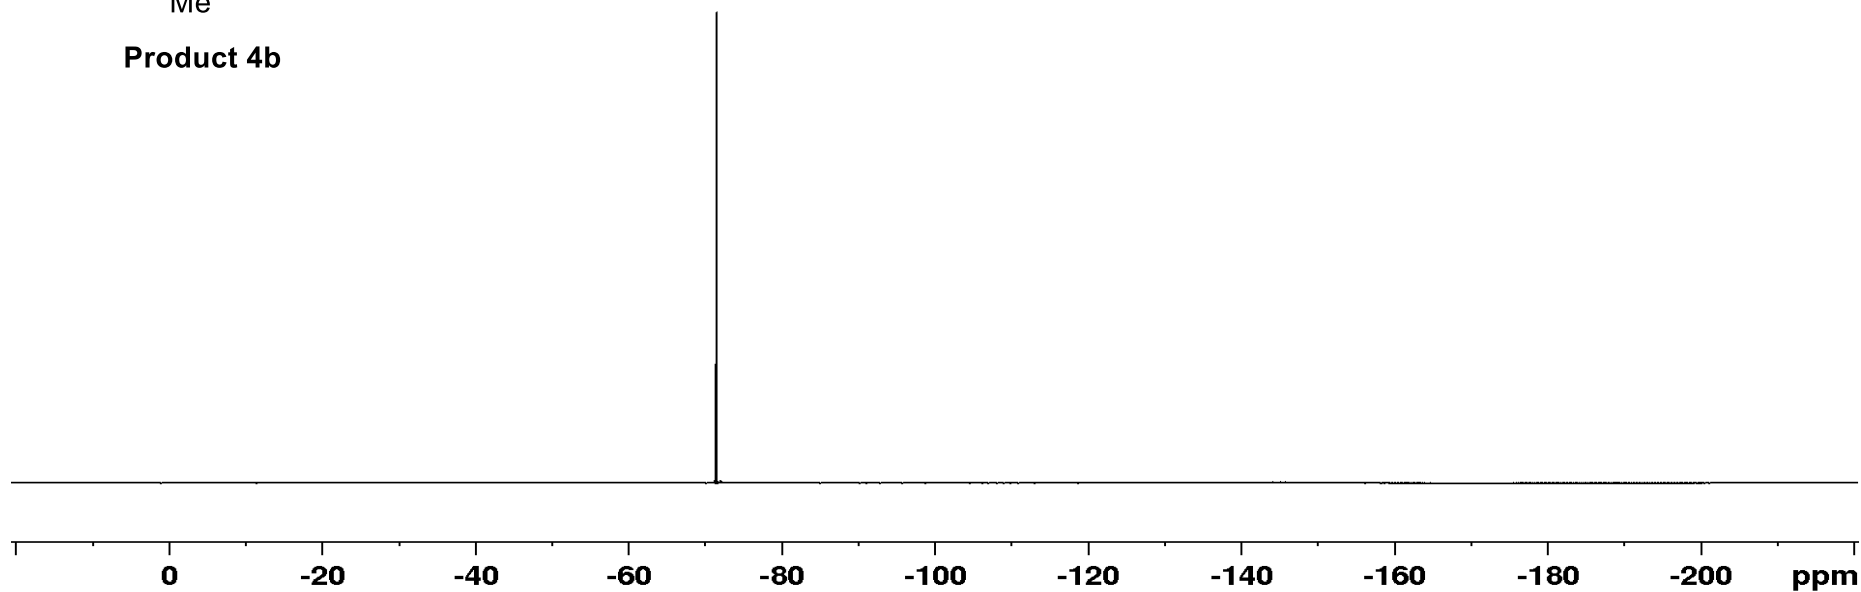

S33

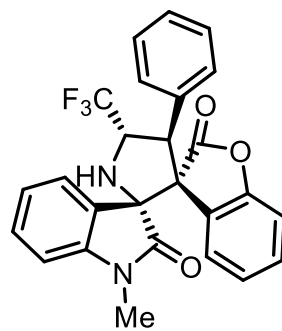

SB-IV-233

Product 4b

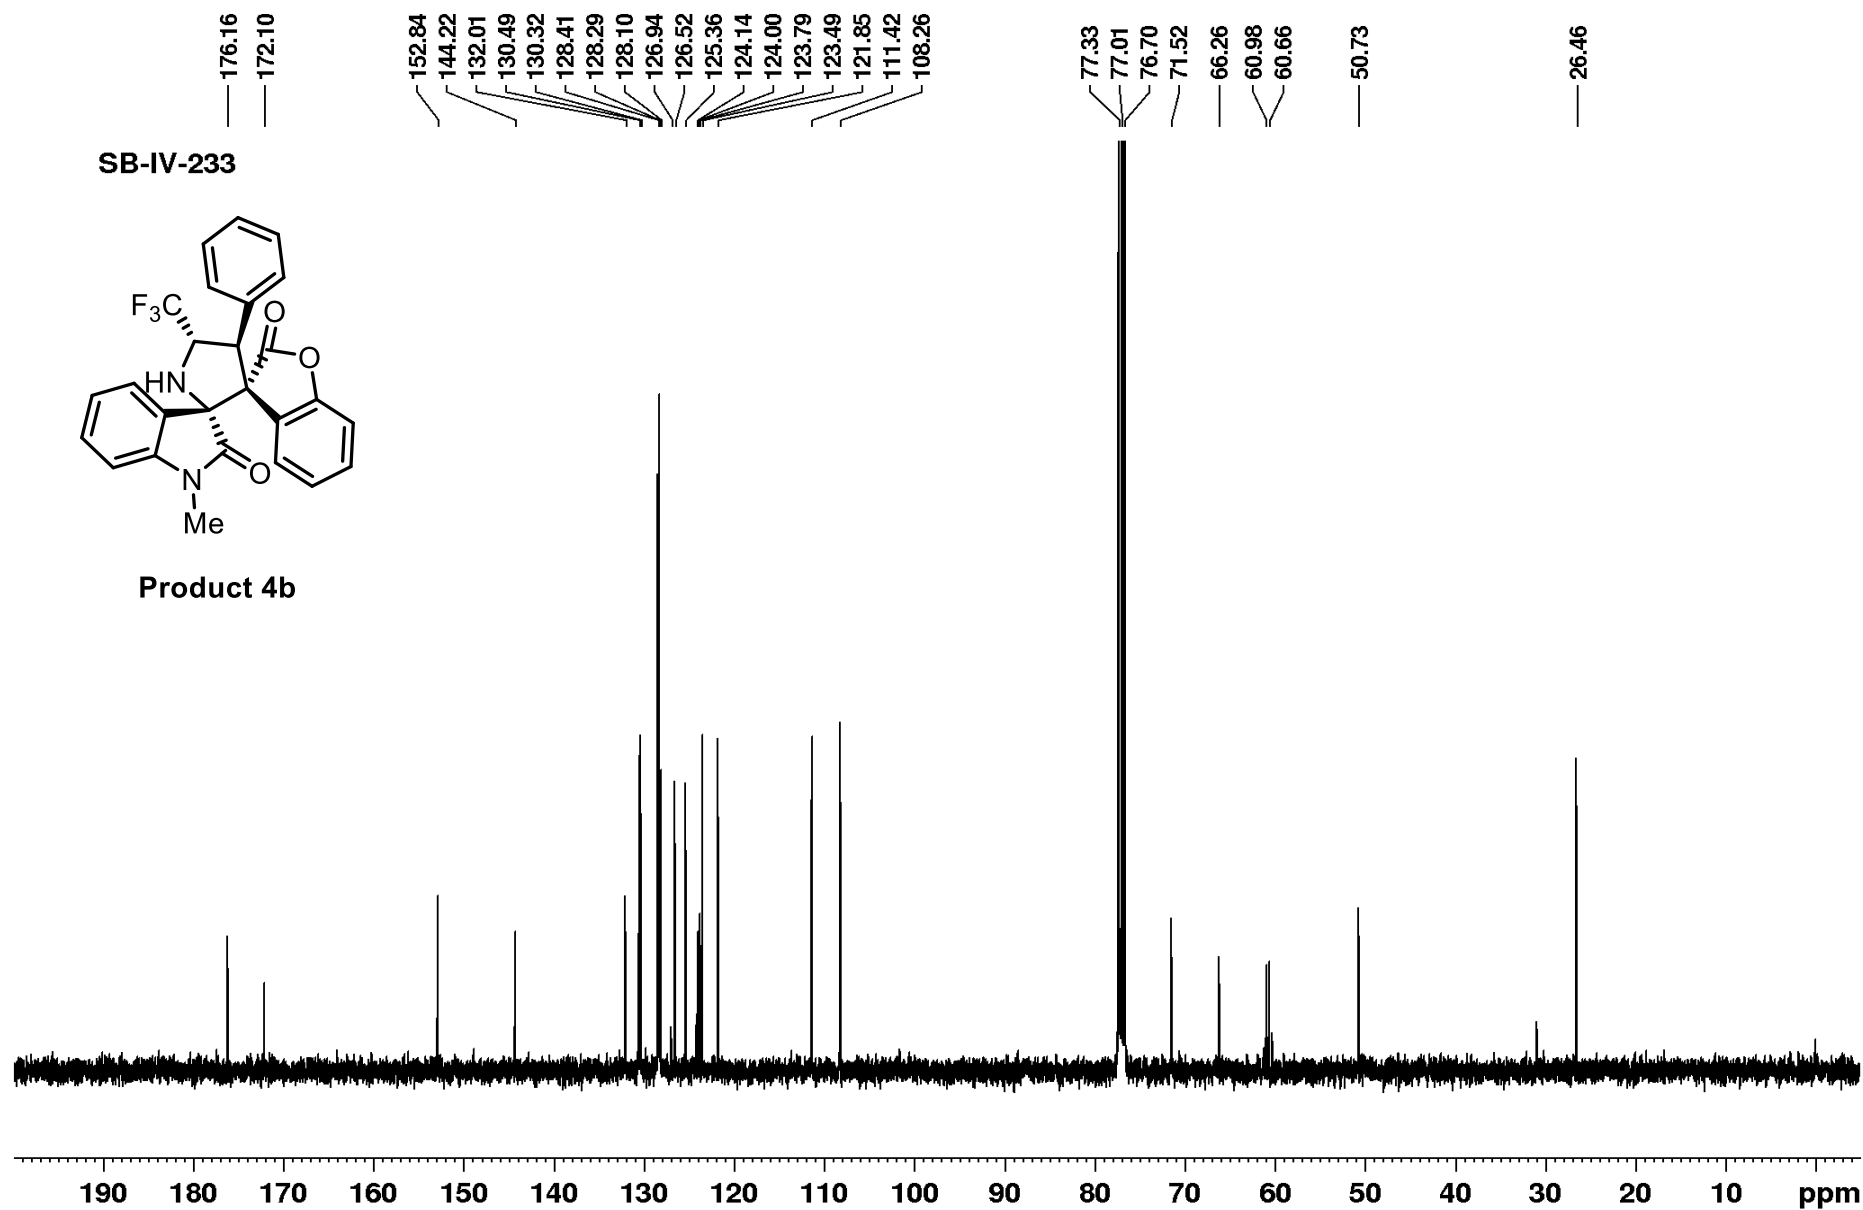

SB-IV-233

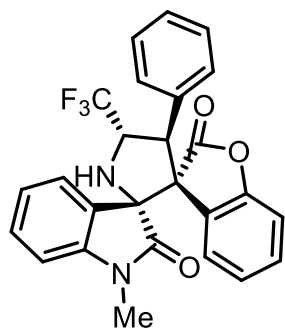

Product 4b

130.49  
130.32  
128.41  
128.29  
128.09  
126.52  
125.36  
123.49  
121.85  
111.42  
108.26

60.98  
60.67  
60.36

50.74

26.46

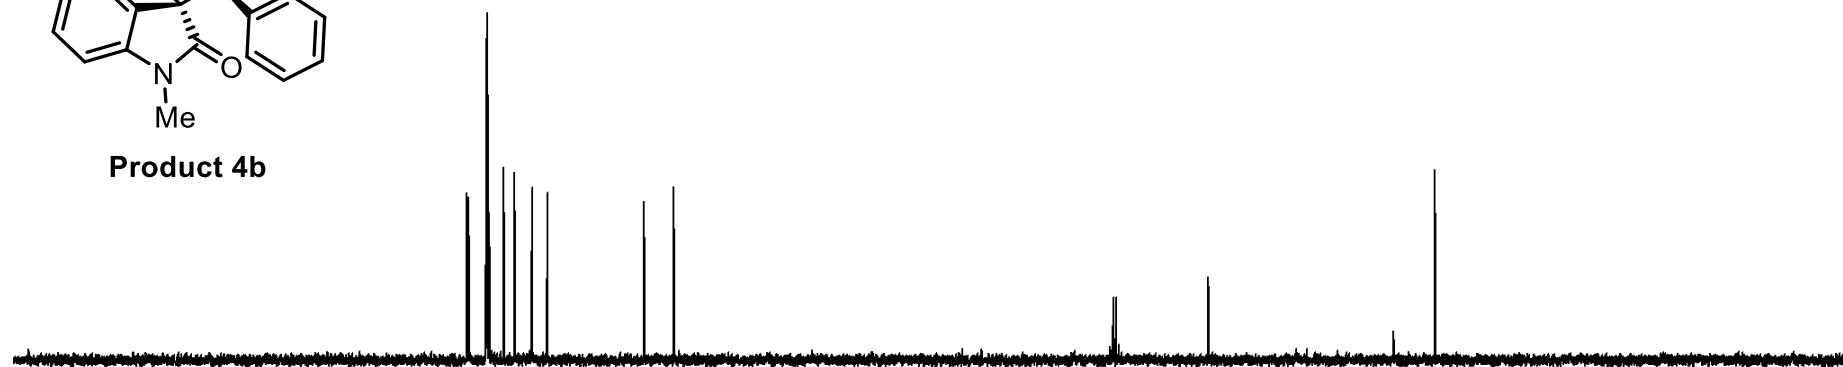

170 160 150 140 130 120 110 100 90 80 70 60 50 40 30 20 10 0 ppm

SB-IV-234

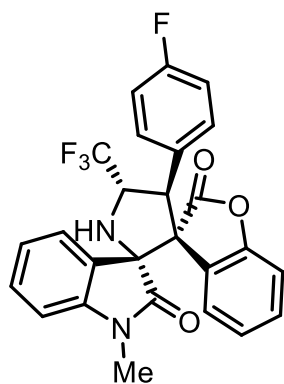

Product 4c

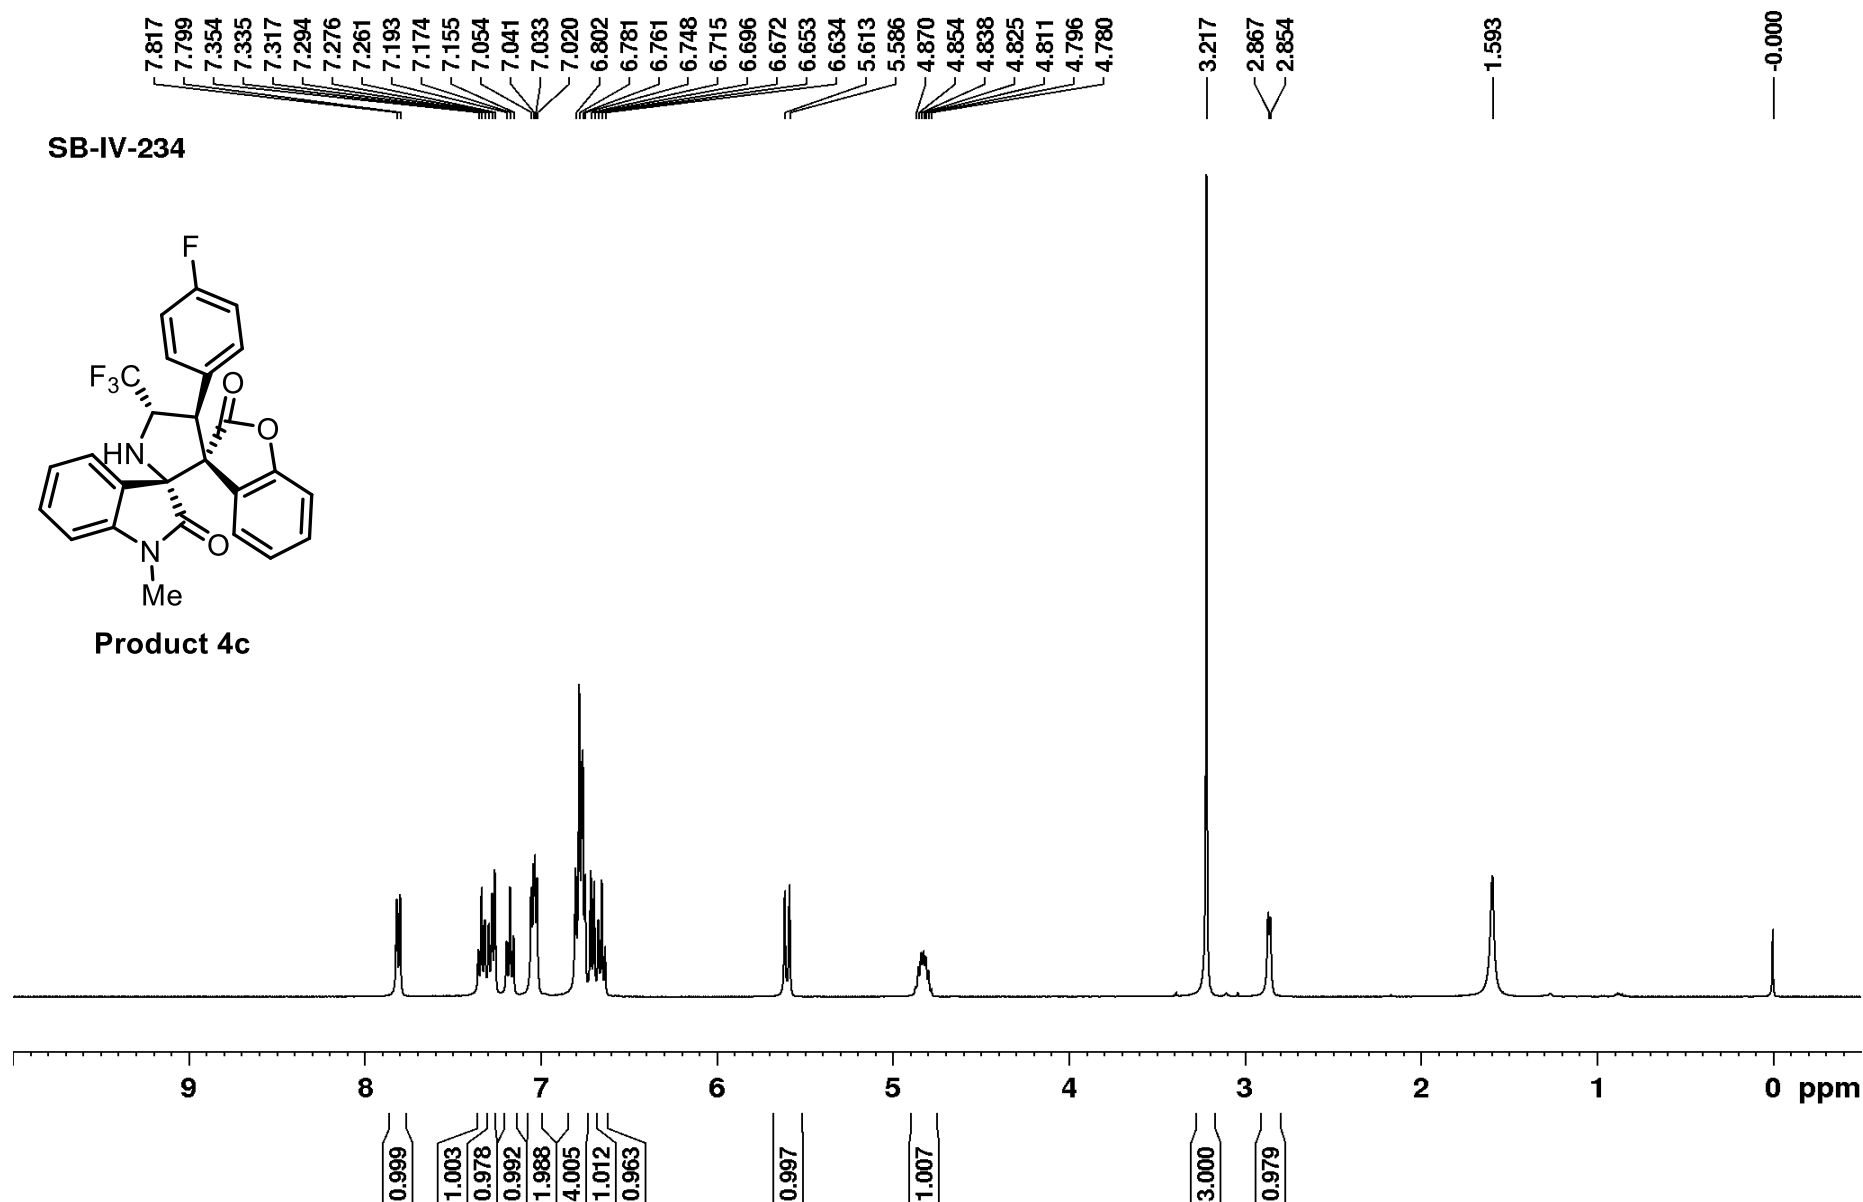



SB-IV-234

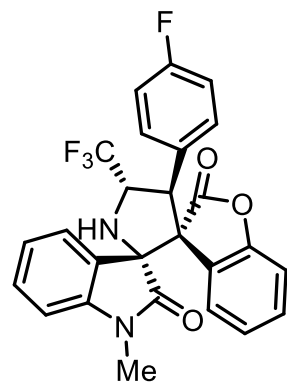

Product 4c

-71.55  
-71.56

-113.62

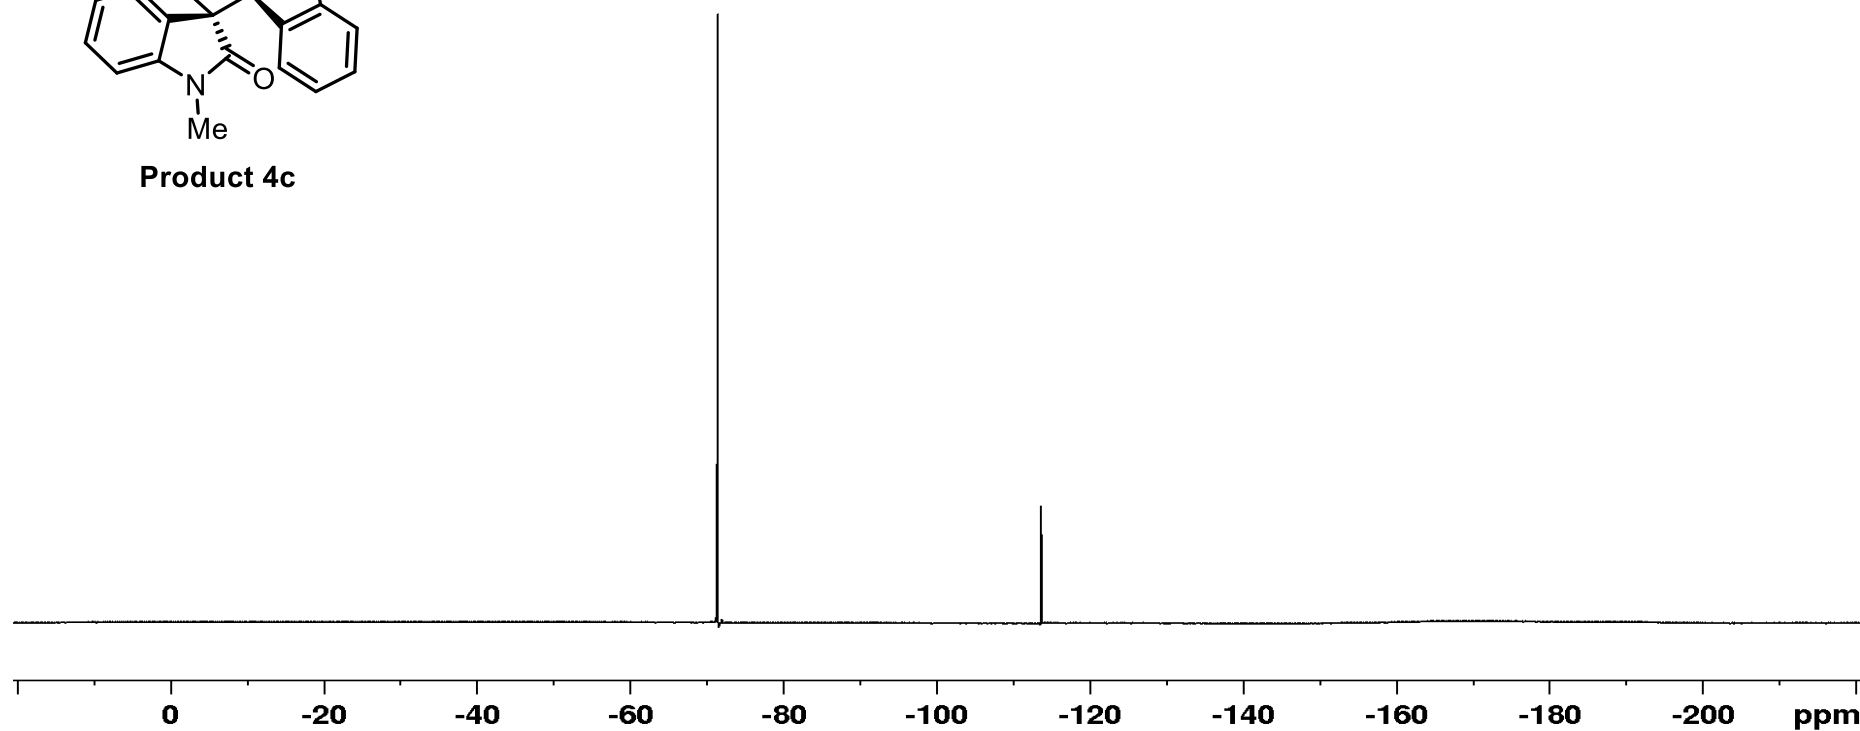

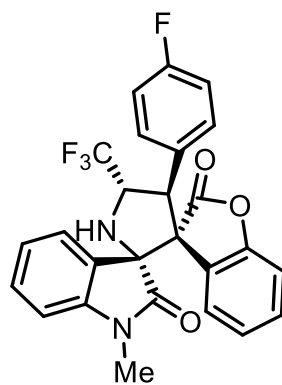

SB-IV-234

Product 4c

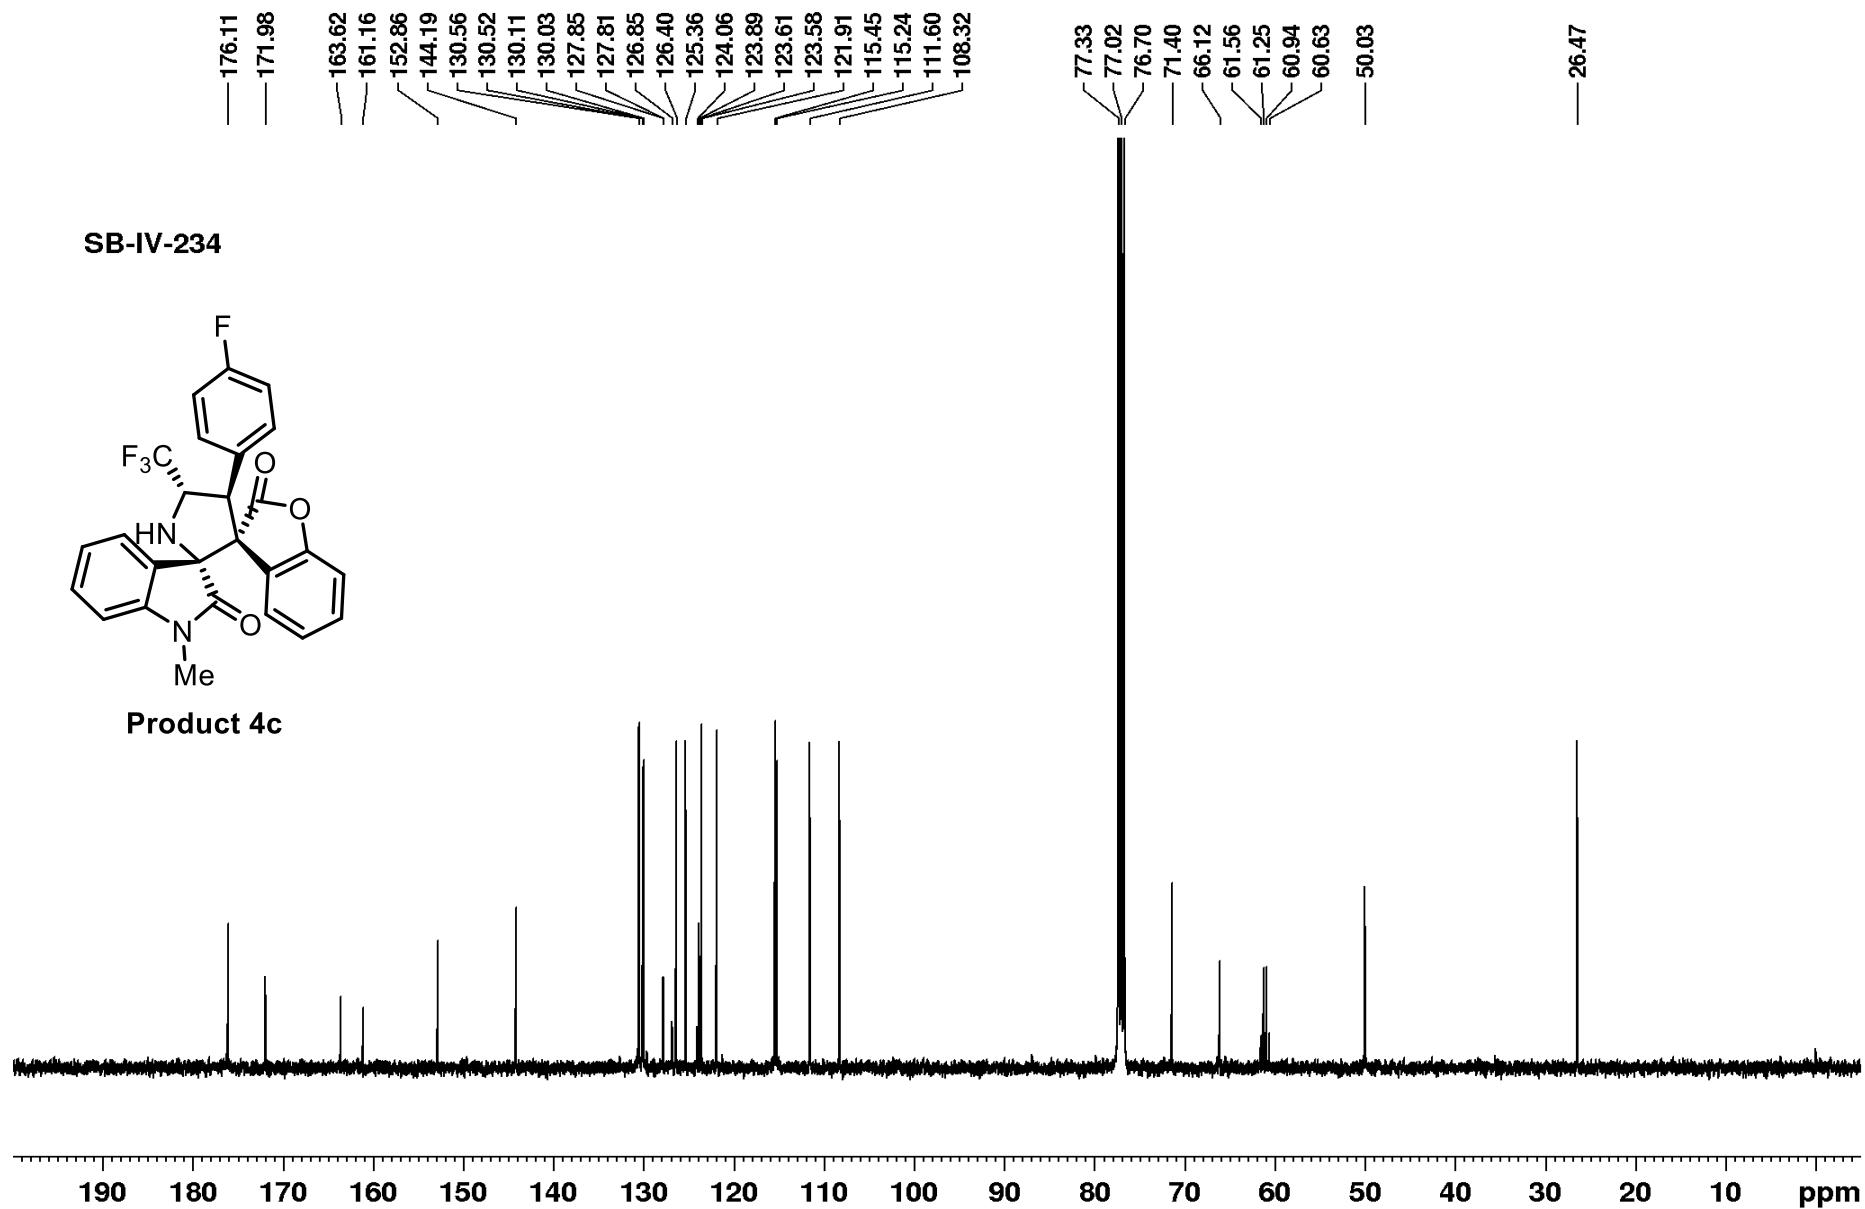

SB-IV-234

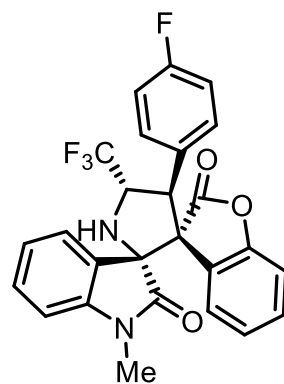

Product 4c

130.55  
130.51  
130.11  
130.03  
126.40  
125.36  
123.60  
121.90  
115.44  
115.23  
111.59  
108.30

61.58  
61.27  
60.96  
60.65

50.03

26.46

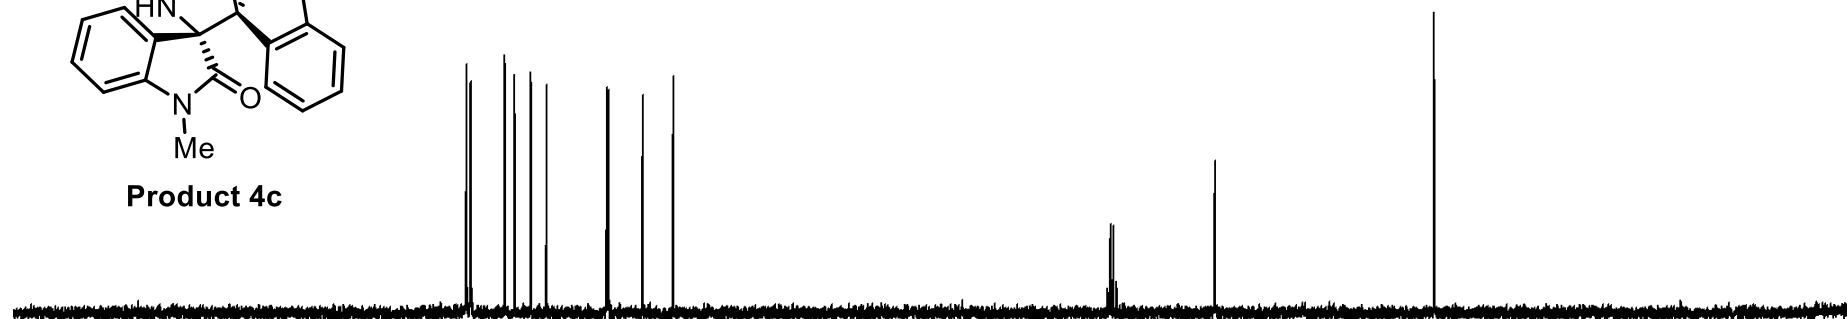

170 160 150 140 130 120 110 100 90 80 70 60 50 40 30 20 10 0 ppm

SB-IV-235

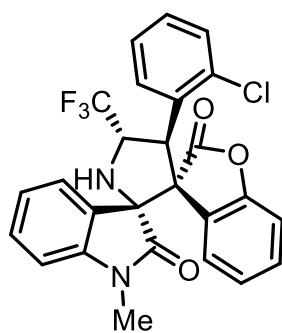

Product 4d

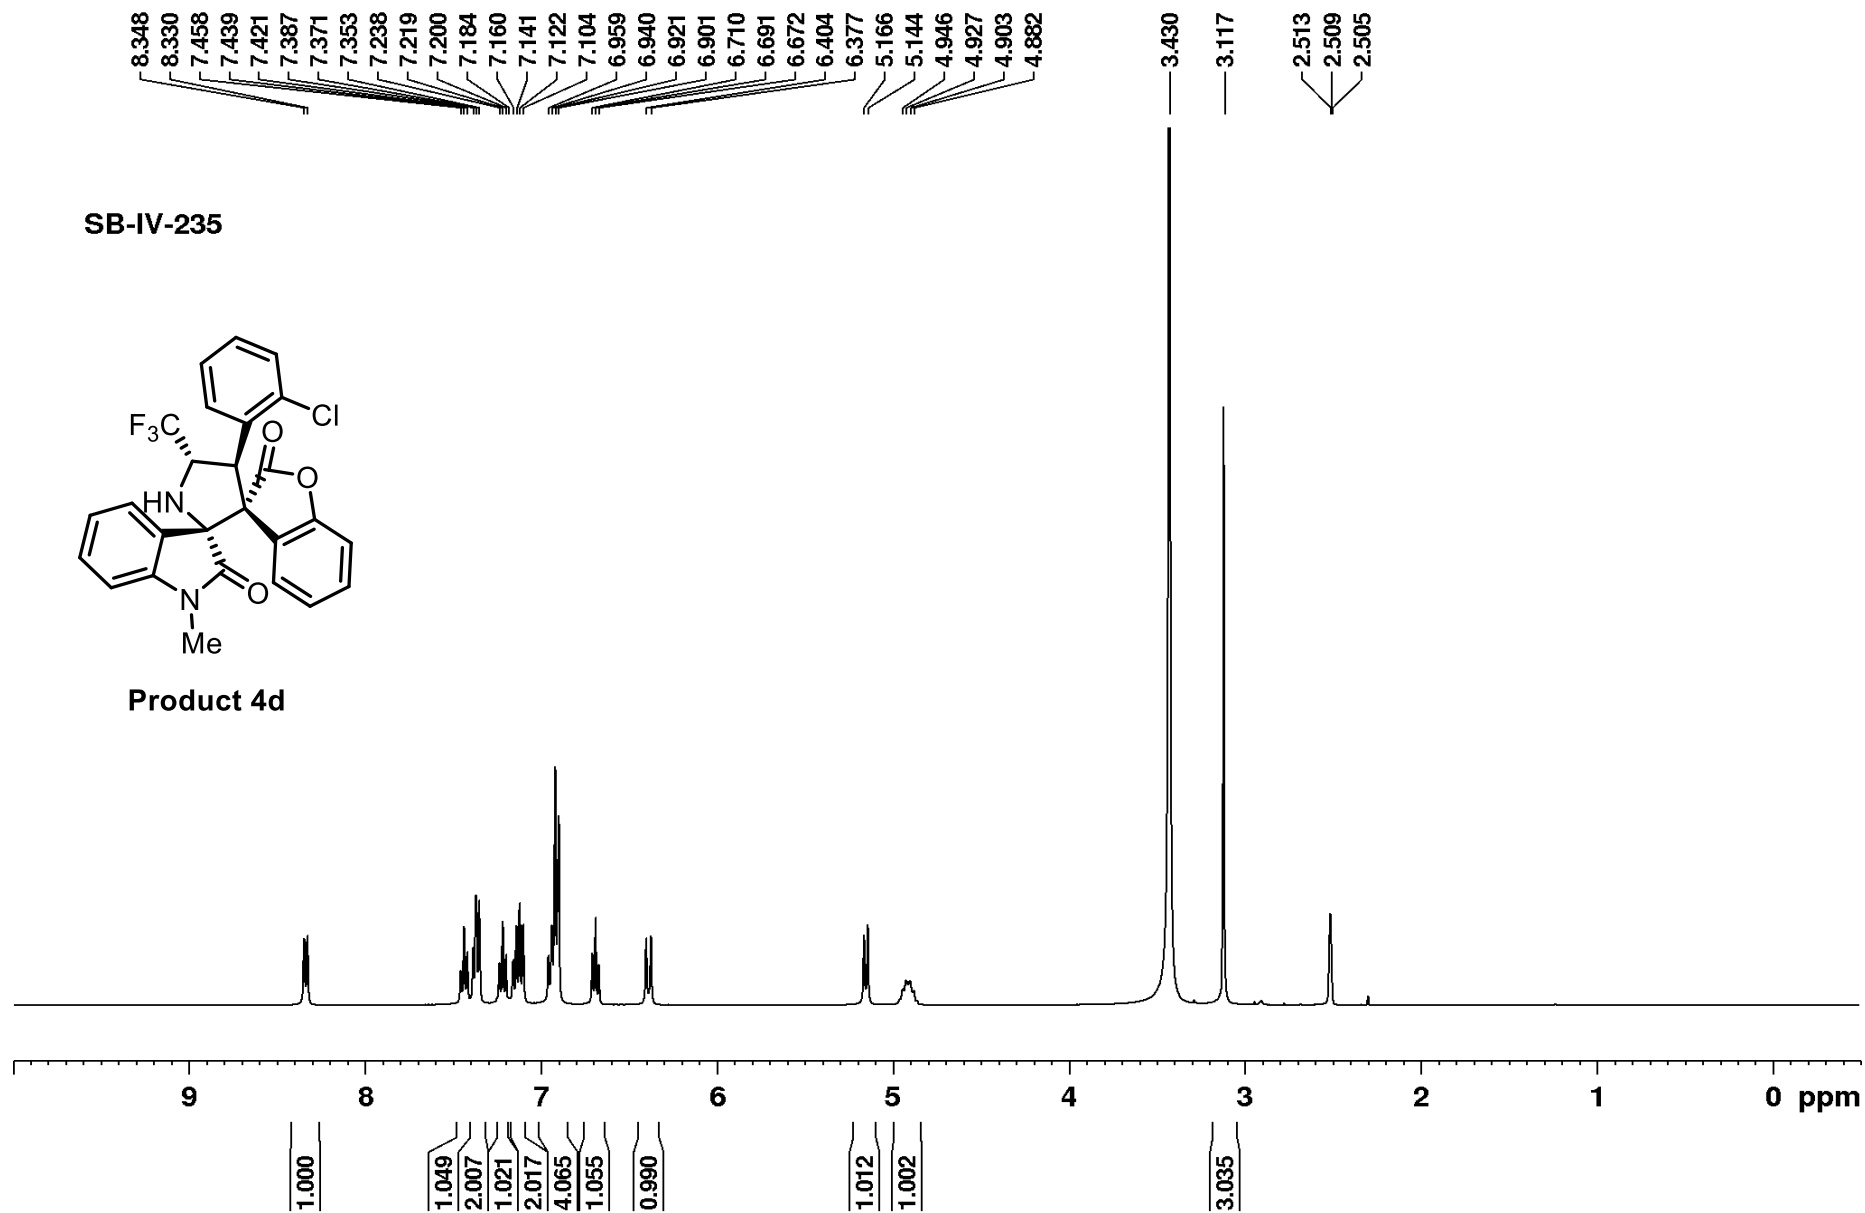

SB-IV-235

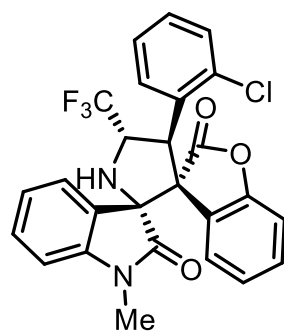

Product 4d

— -70.62

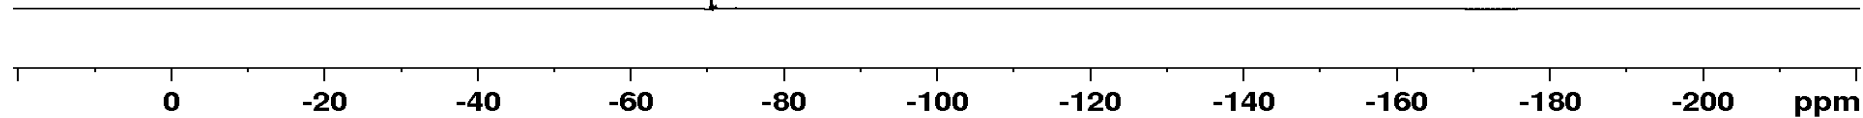

S41

SB-IV-235

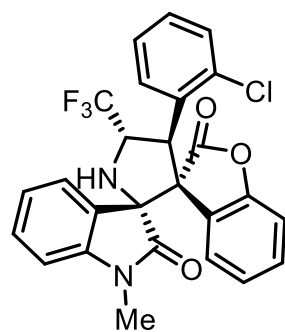

Product 4d

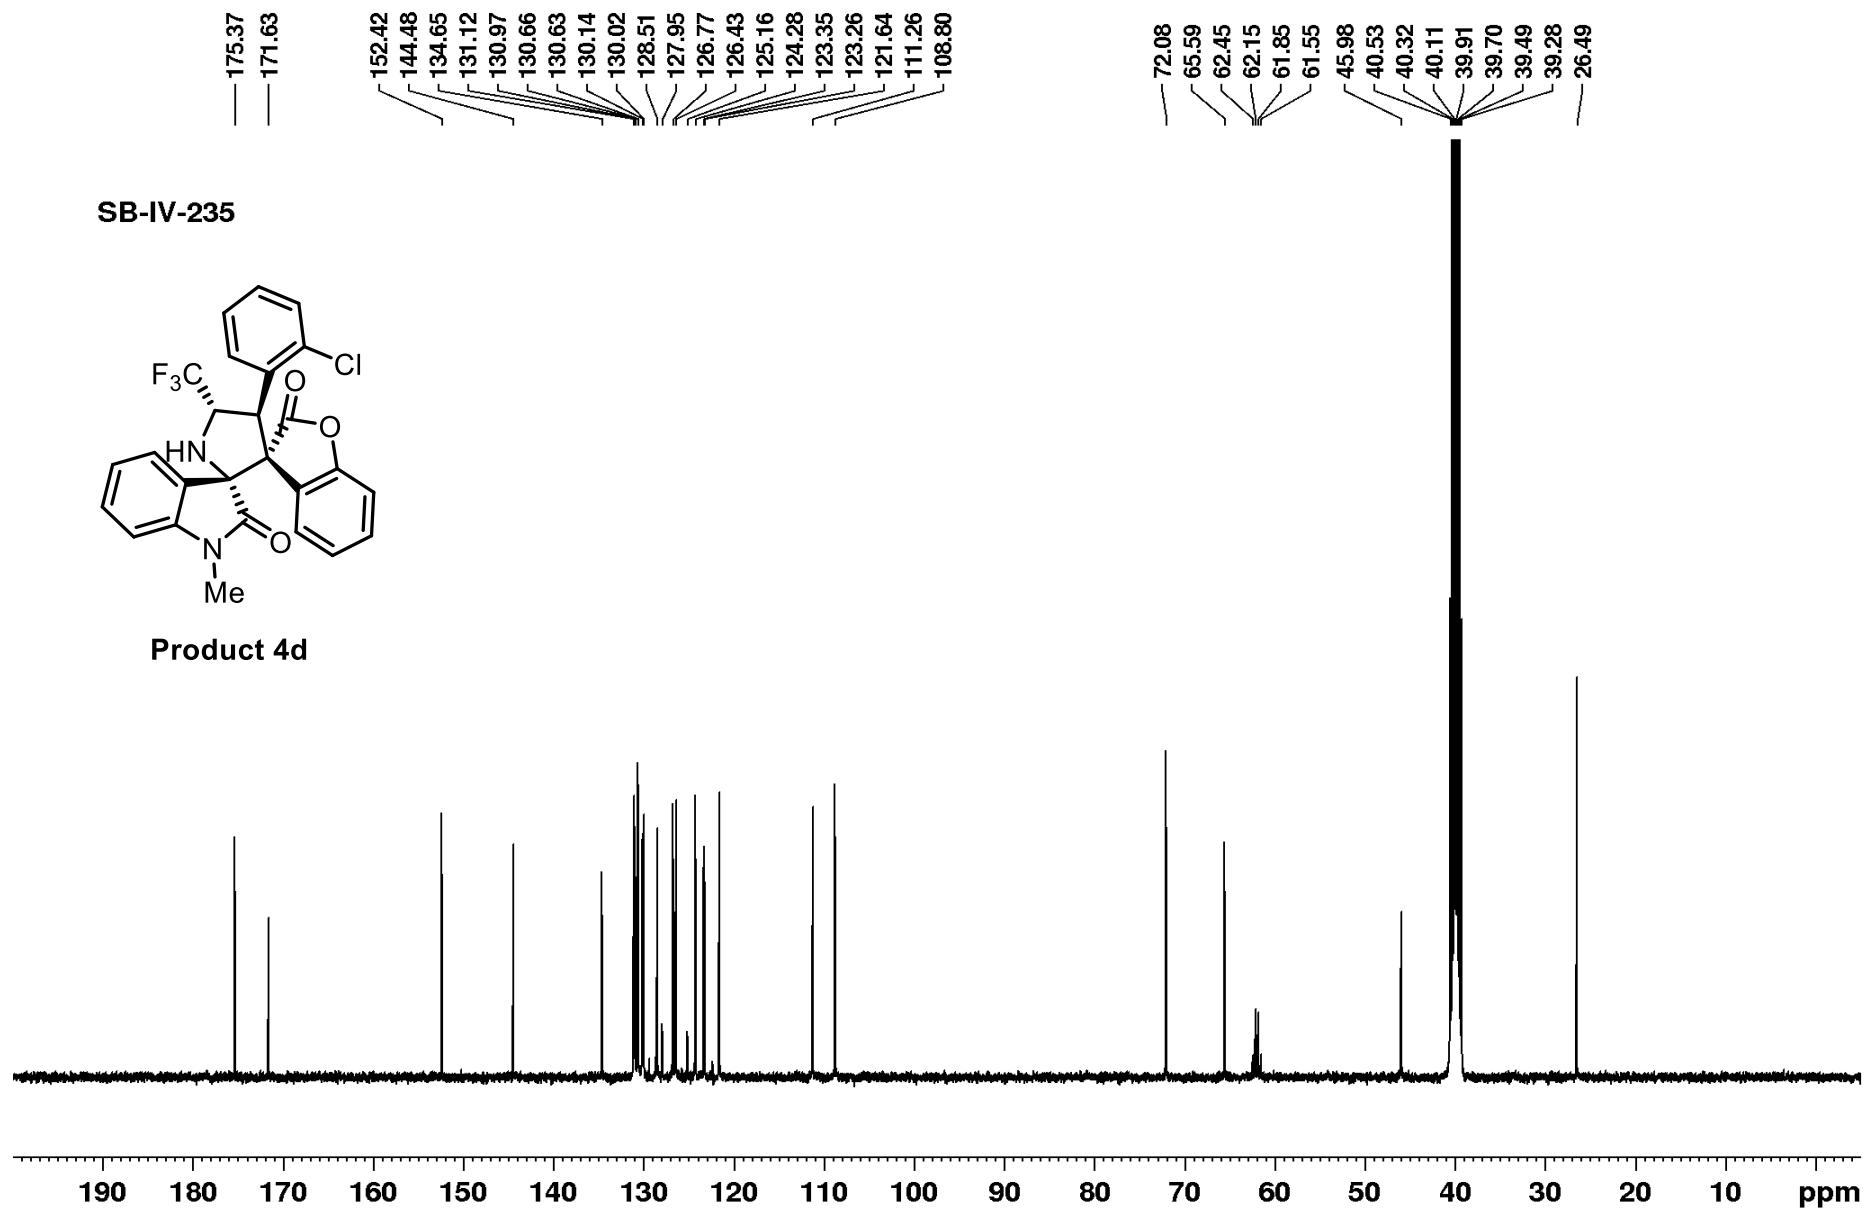

SB-IV-235

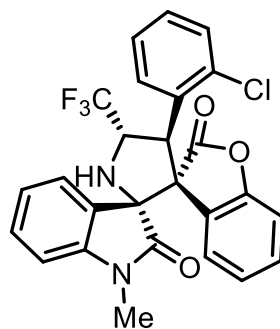

Product 4d

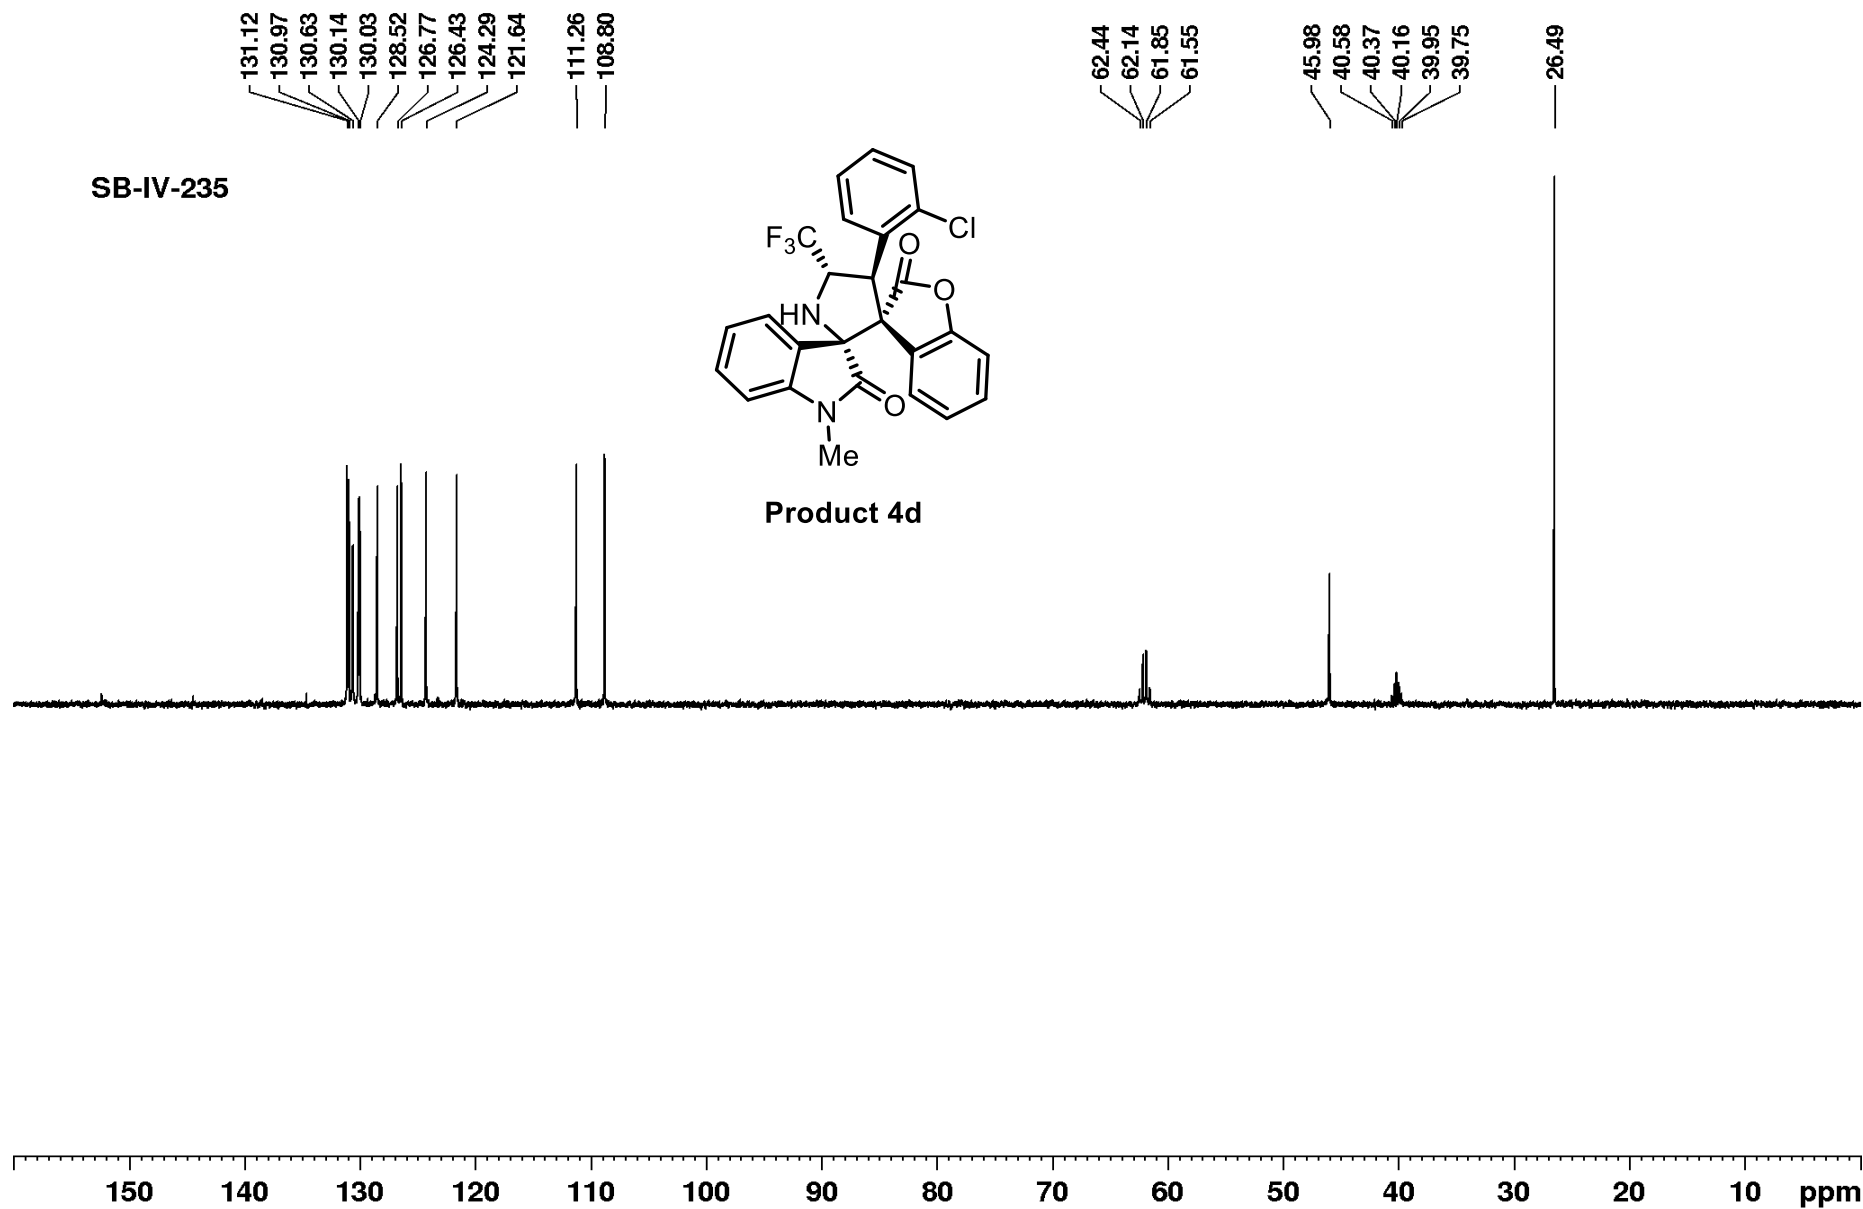

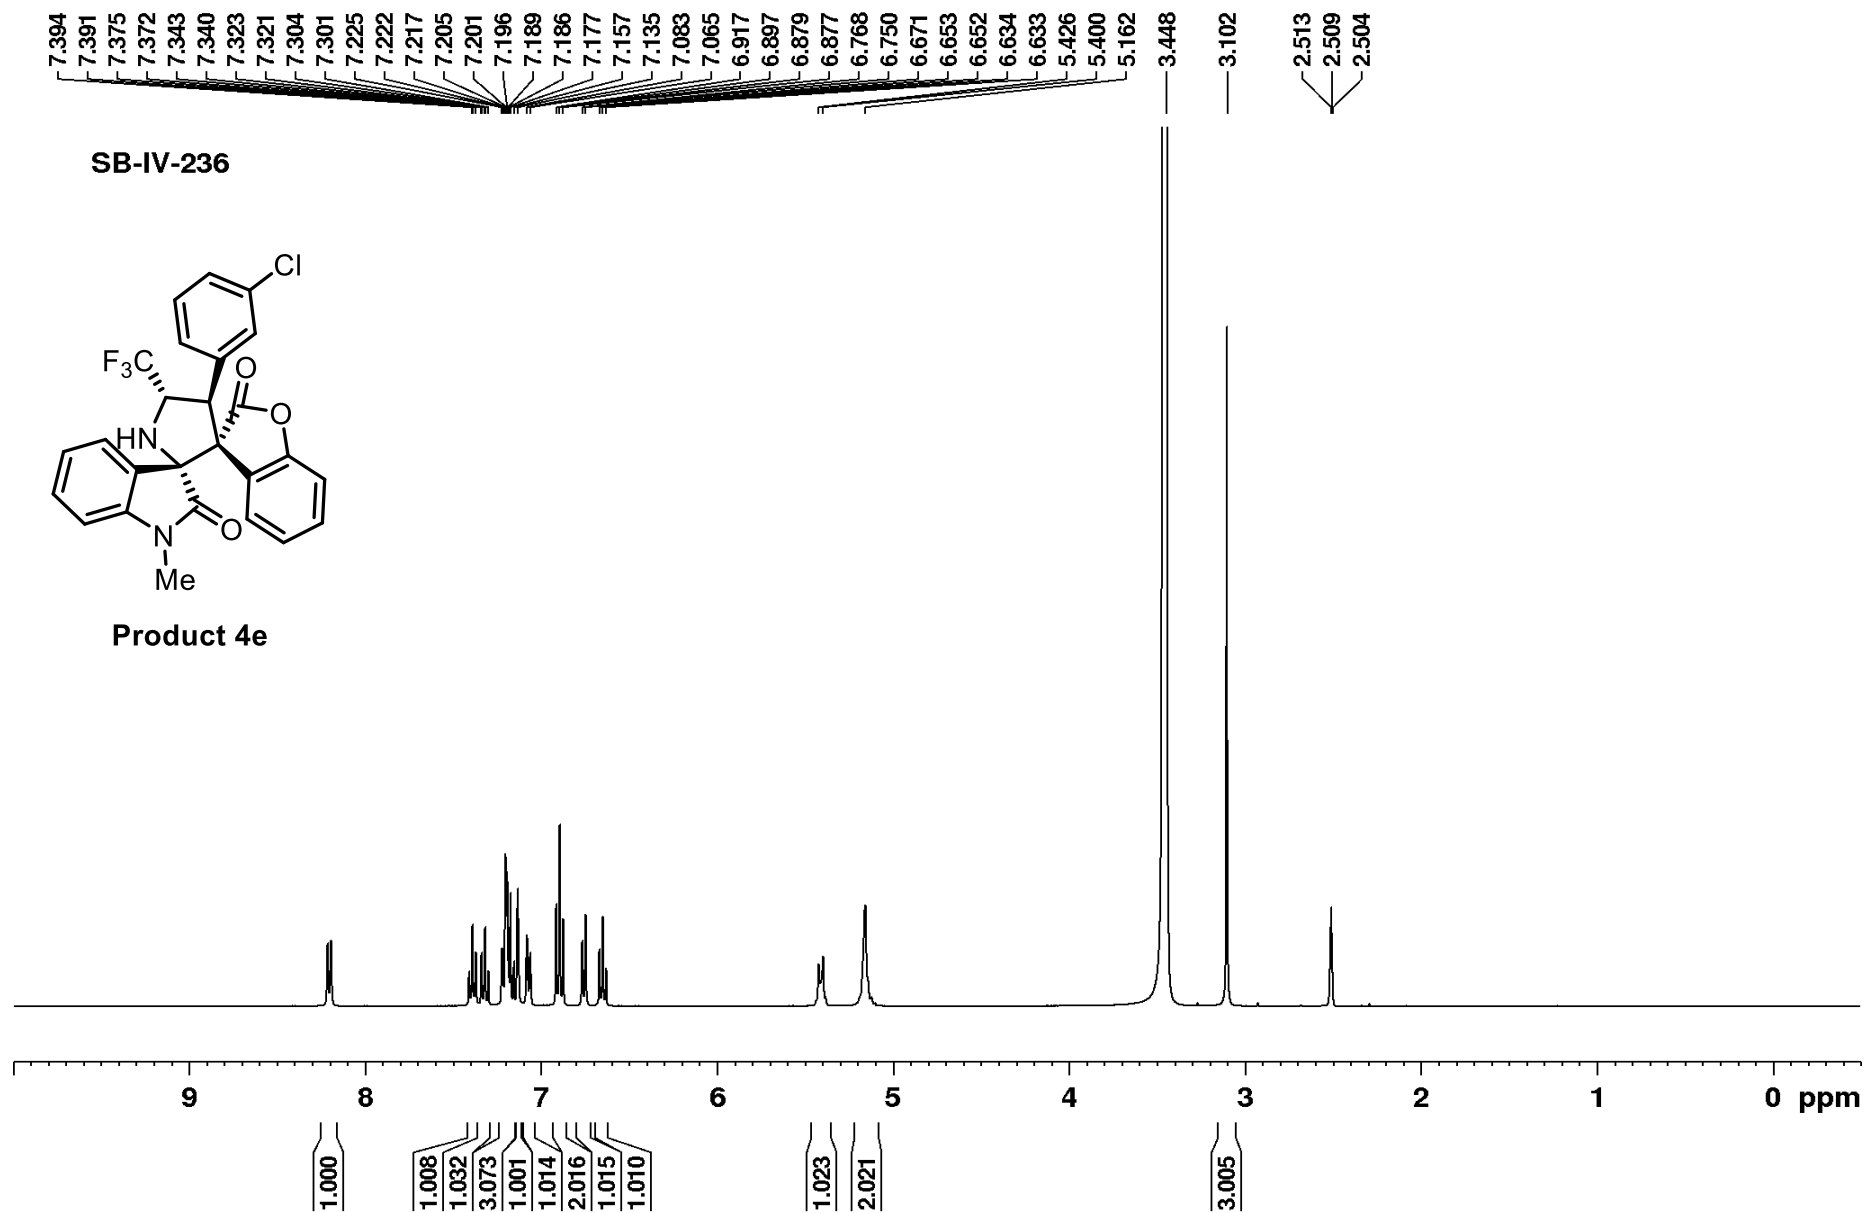



SB-IV-236

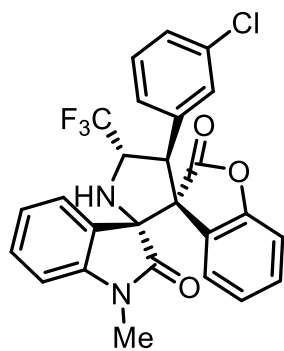

Product 4e

— -70.54

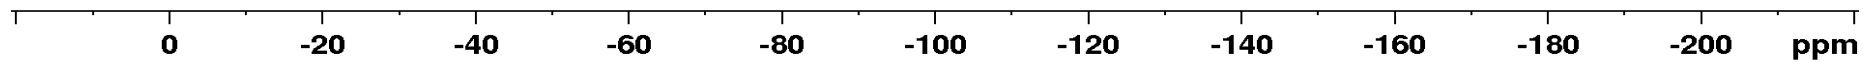

S45

SB-IV-236

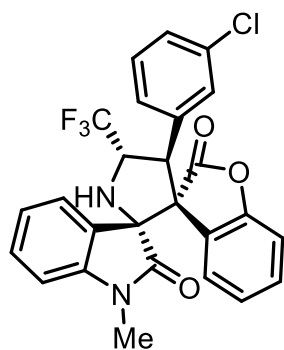

Product 4e

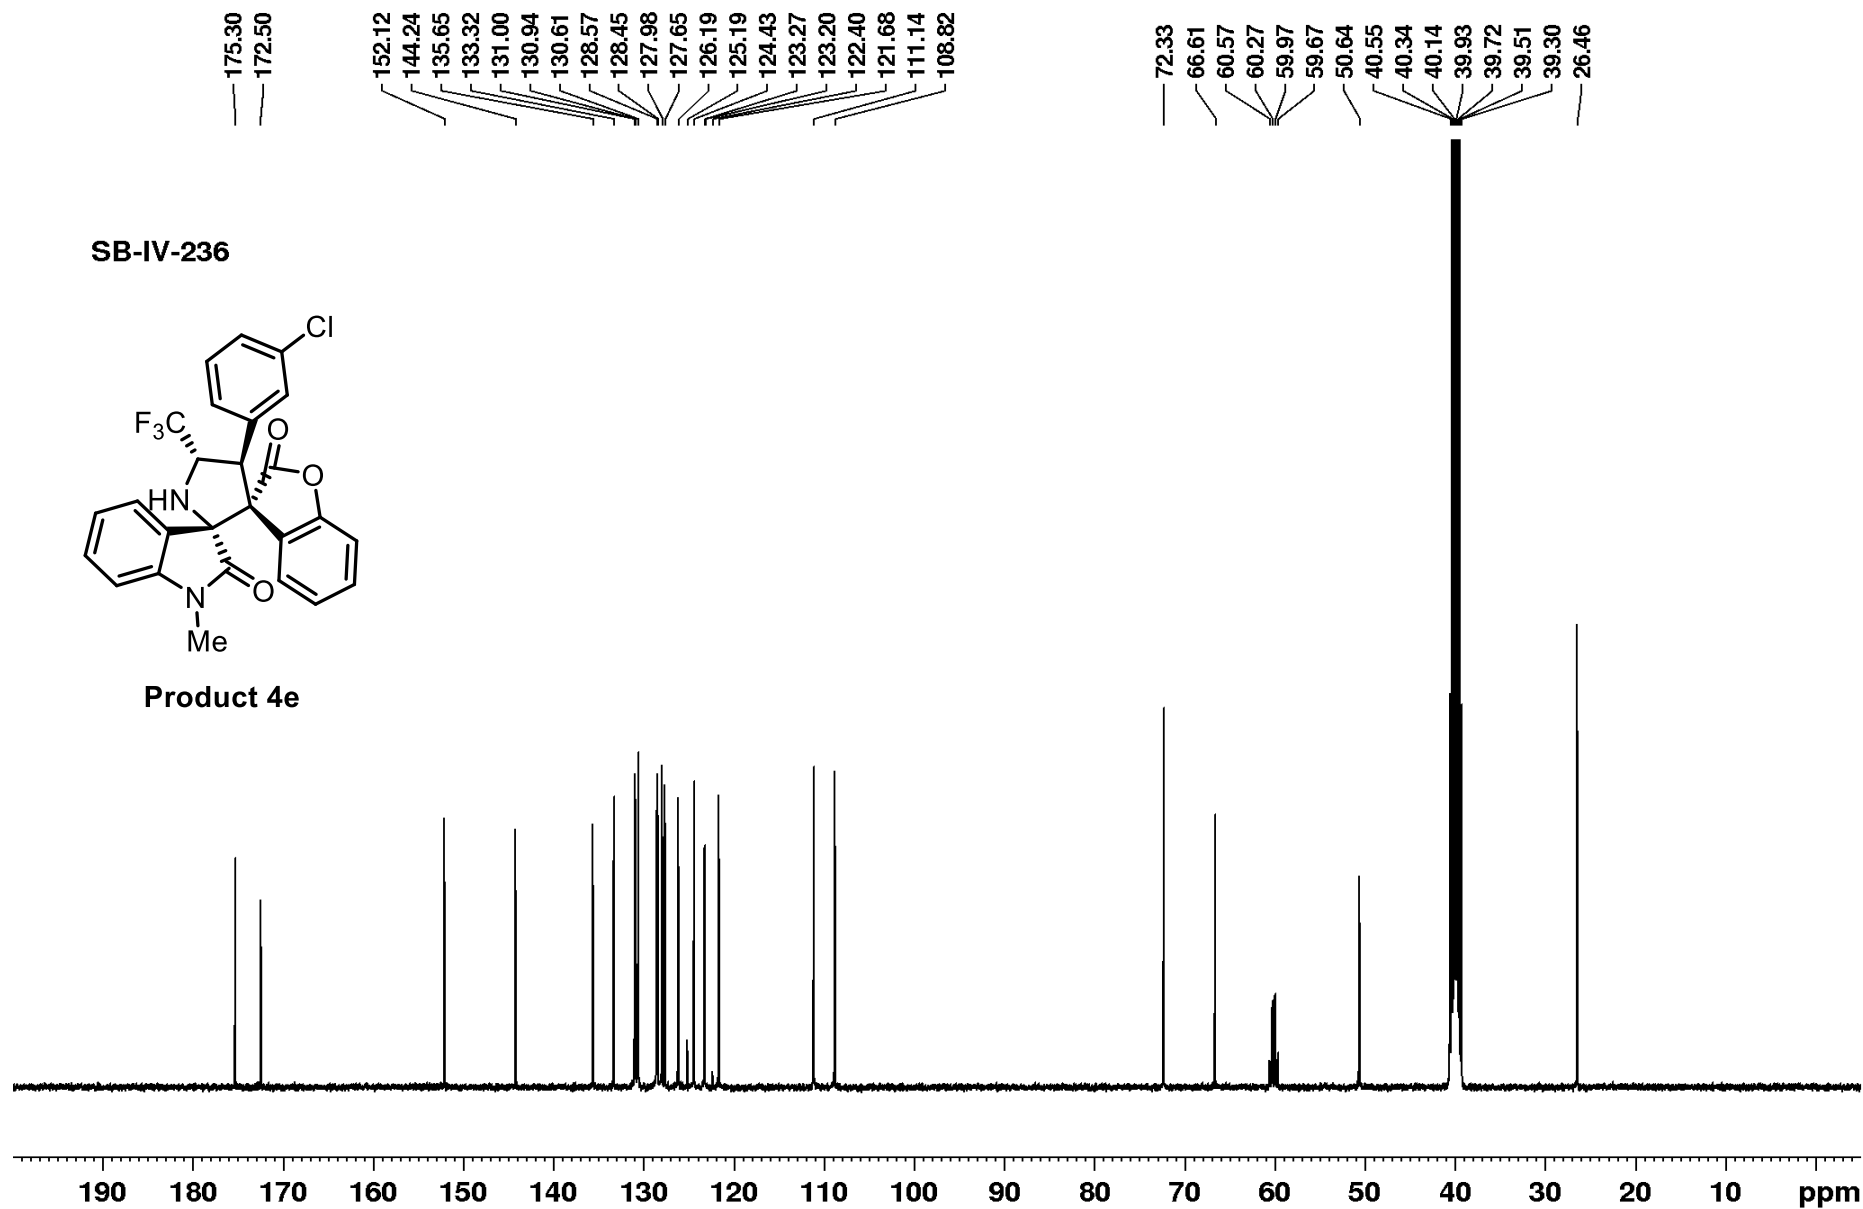

131.01  
130.95  
130.62  
128.58  
128.45  
127.98  
127.66  
126.21  
124.45  
121.69  
111.15  
108.84

60.51  
60.21  
59.91  
59.61  
50.63  
40.55  
40.34  
40.14  
39.93  
39.73  
26.47

SB-IV-236

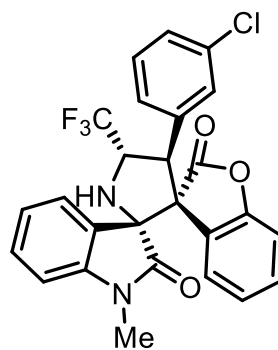

Product 4e

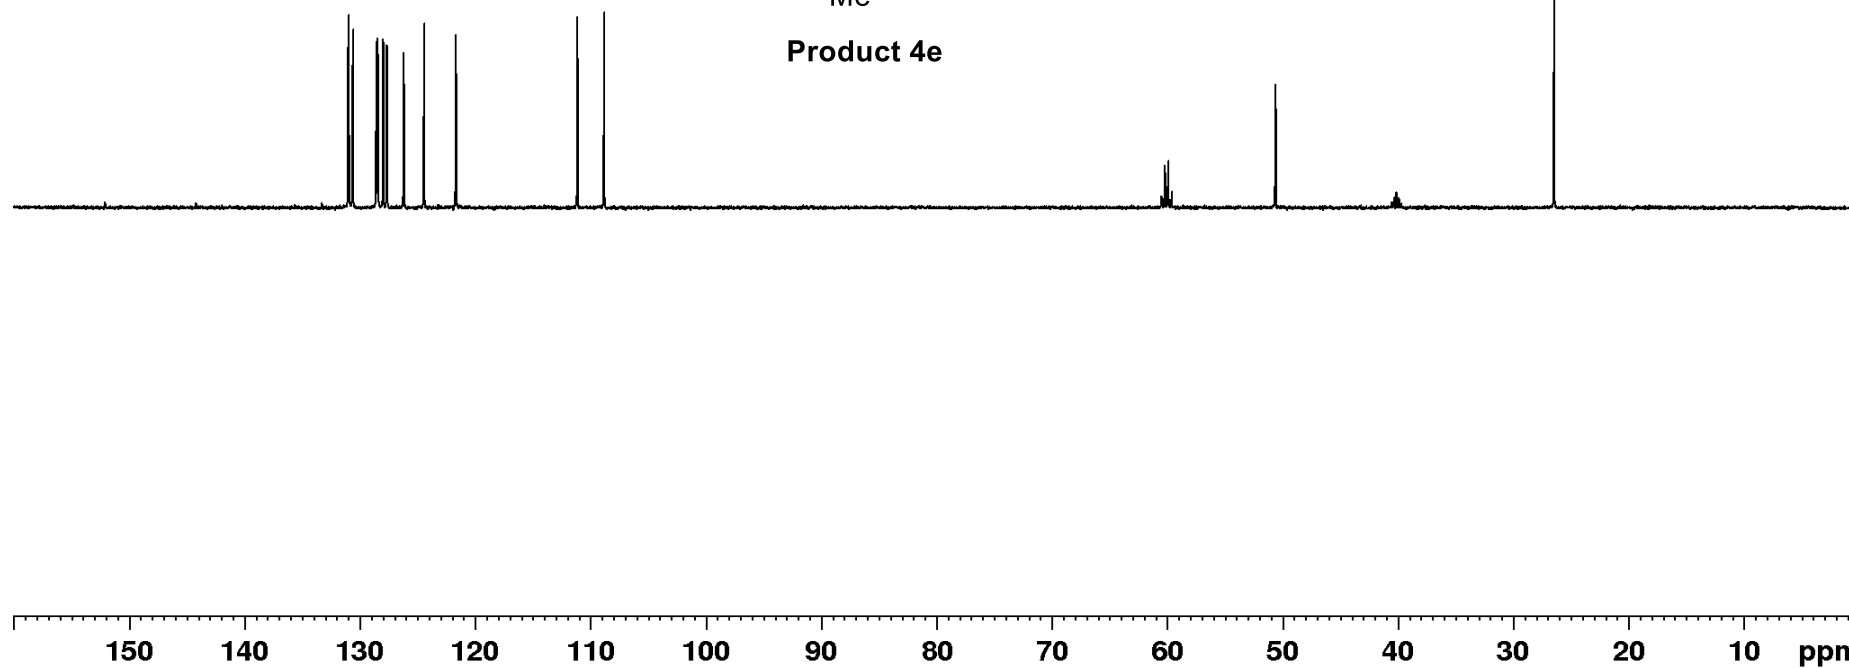

SB-IV-239

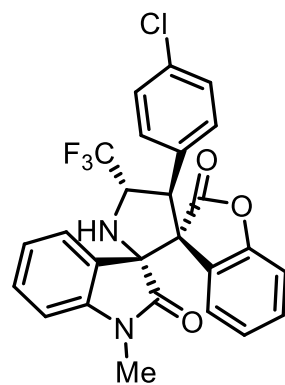

Product 4f

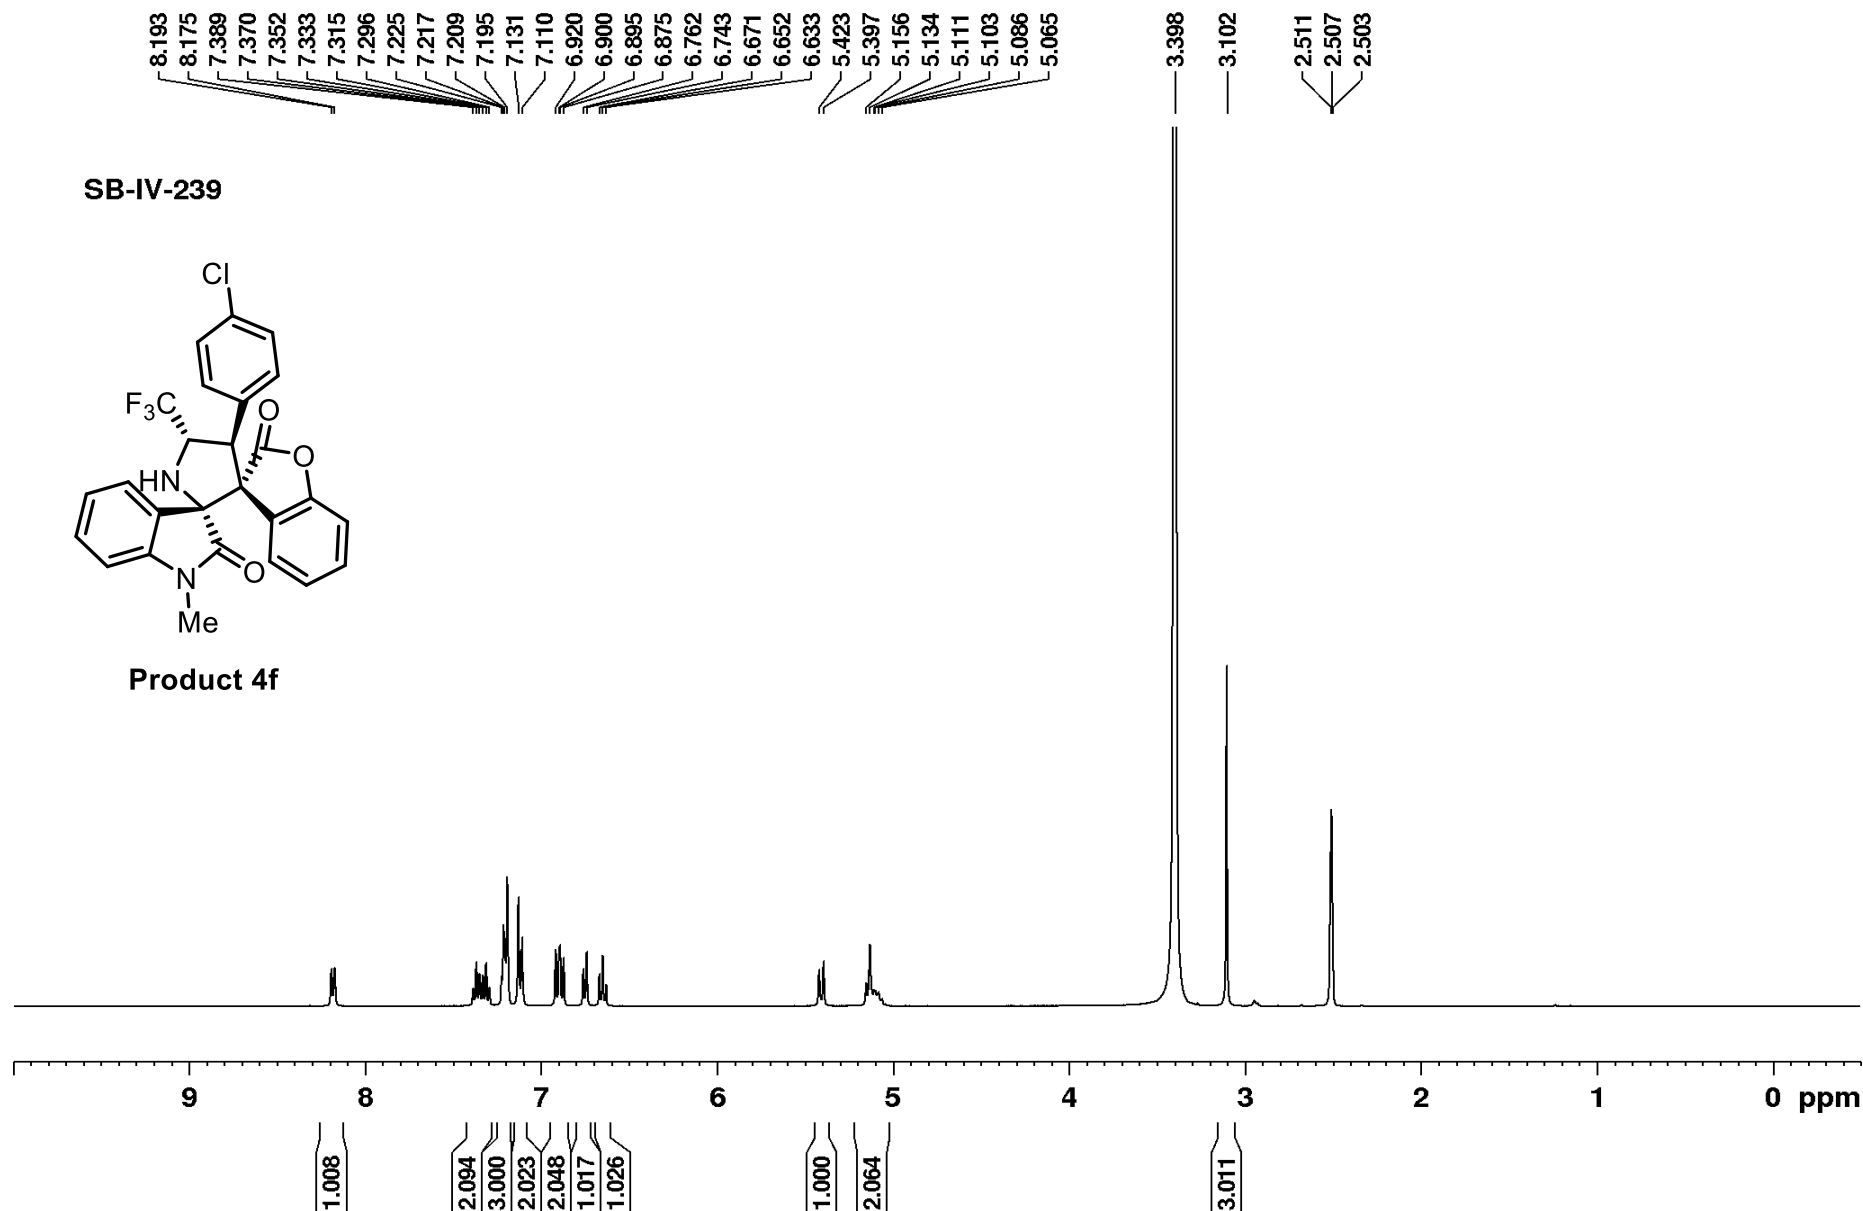

SB-IV-239

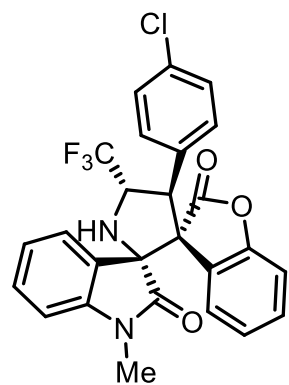

Product 4f

— -70.51

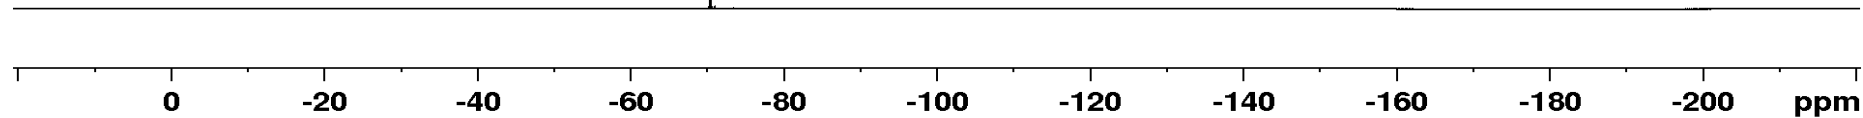

SB-IV-239

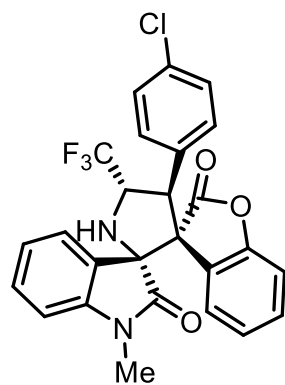

Product 4f

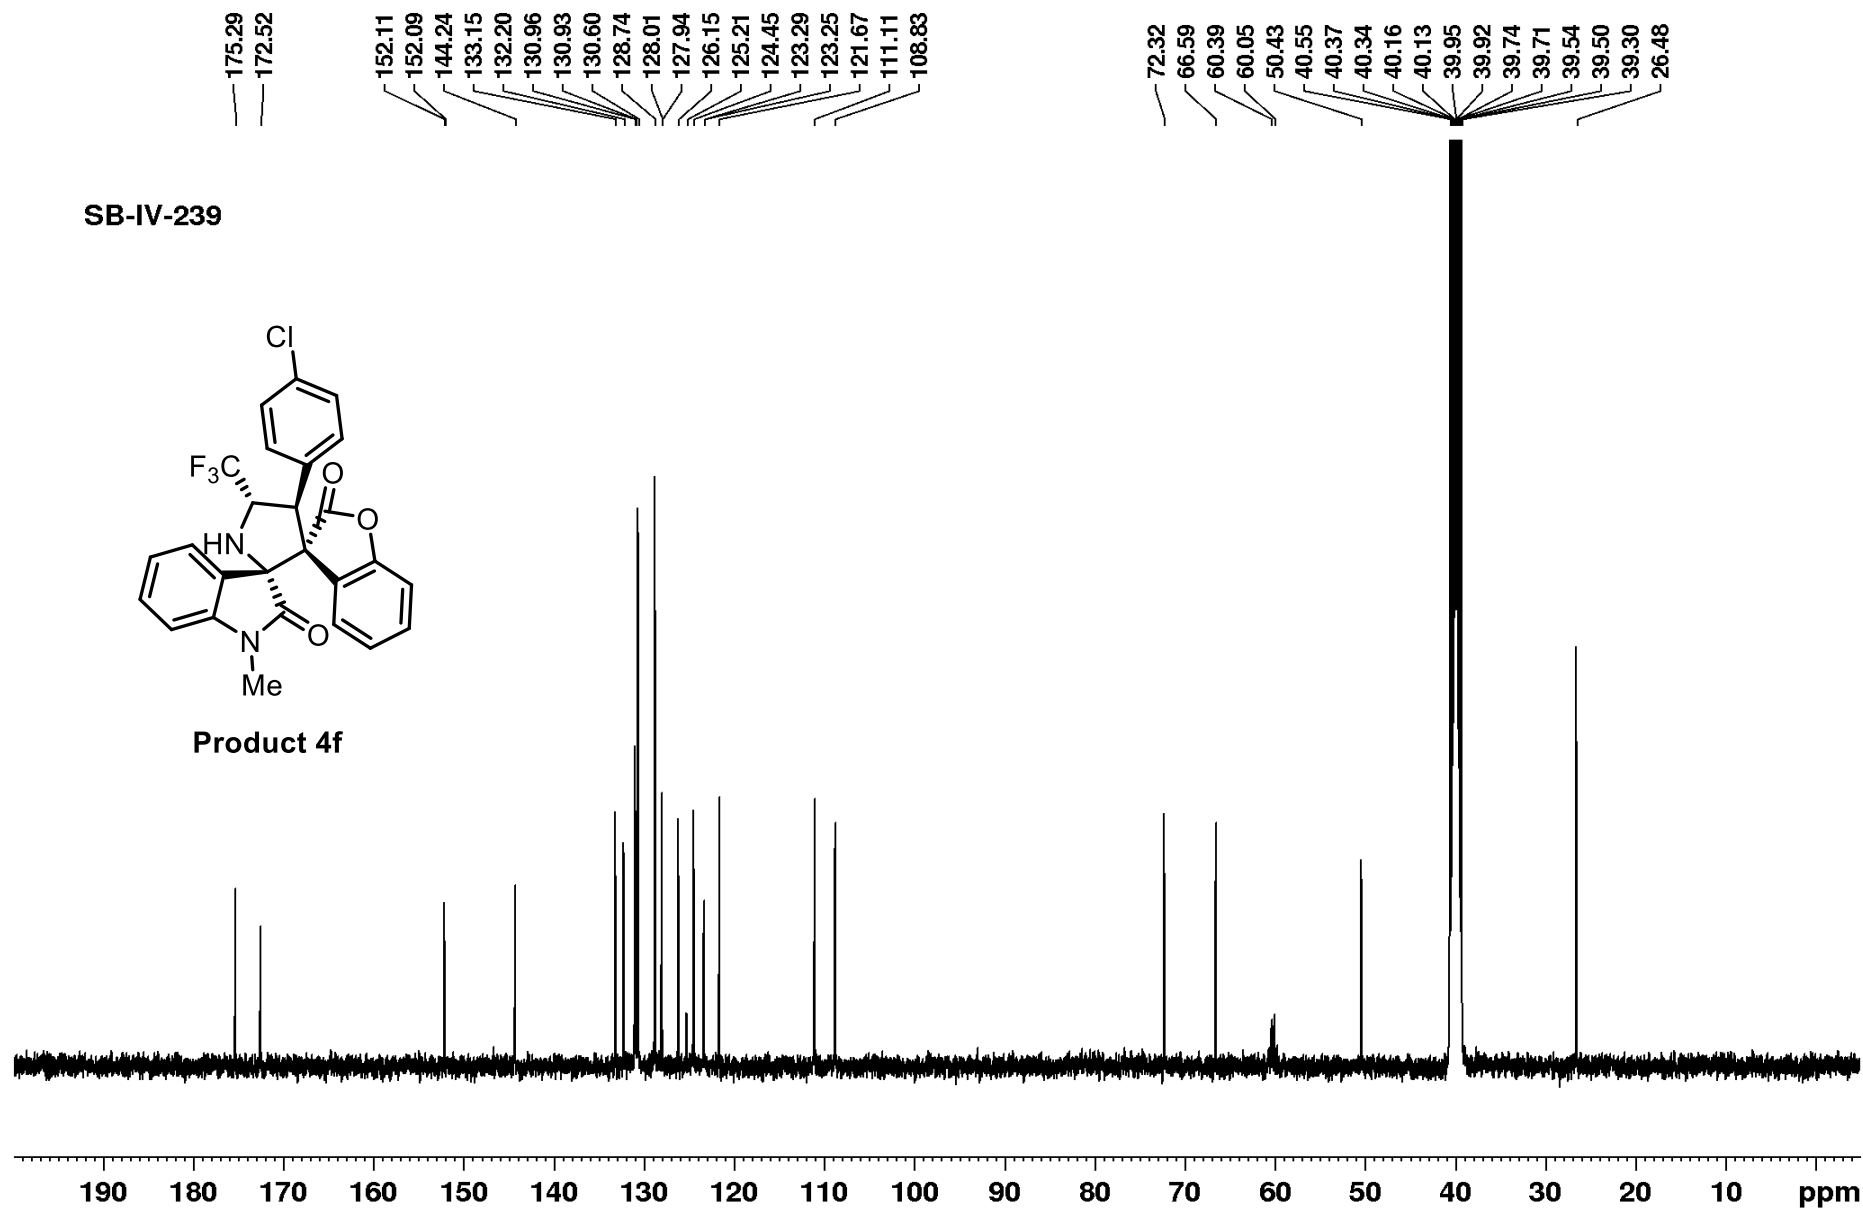

SB-IV-239

130.96  
130.93  
130.60  
128.74  
127.94  
126.15  
124.45  
121.67  
  
111.11  
108.82

60.69  
60.39  
60.08  
59.78  
  
50.44  
  
40.62  
40.42  
40.21  
40.00  
39.78  
  
26.48

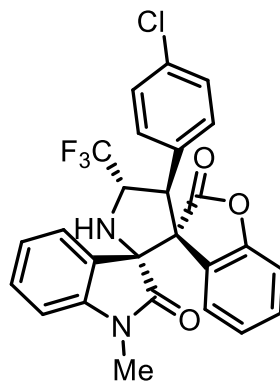

Product 4f

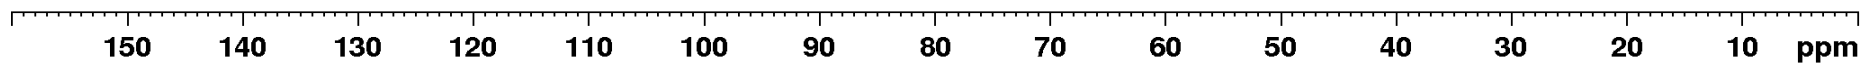

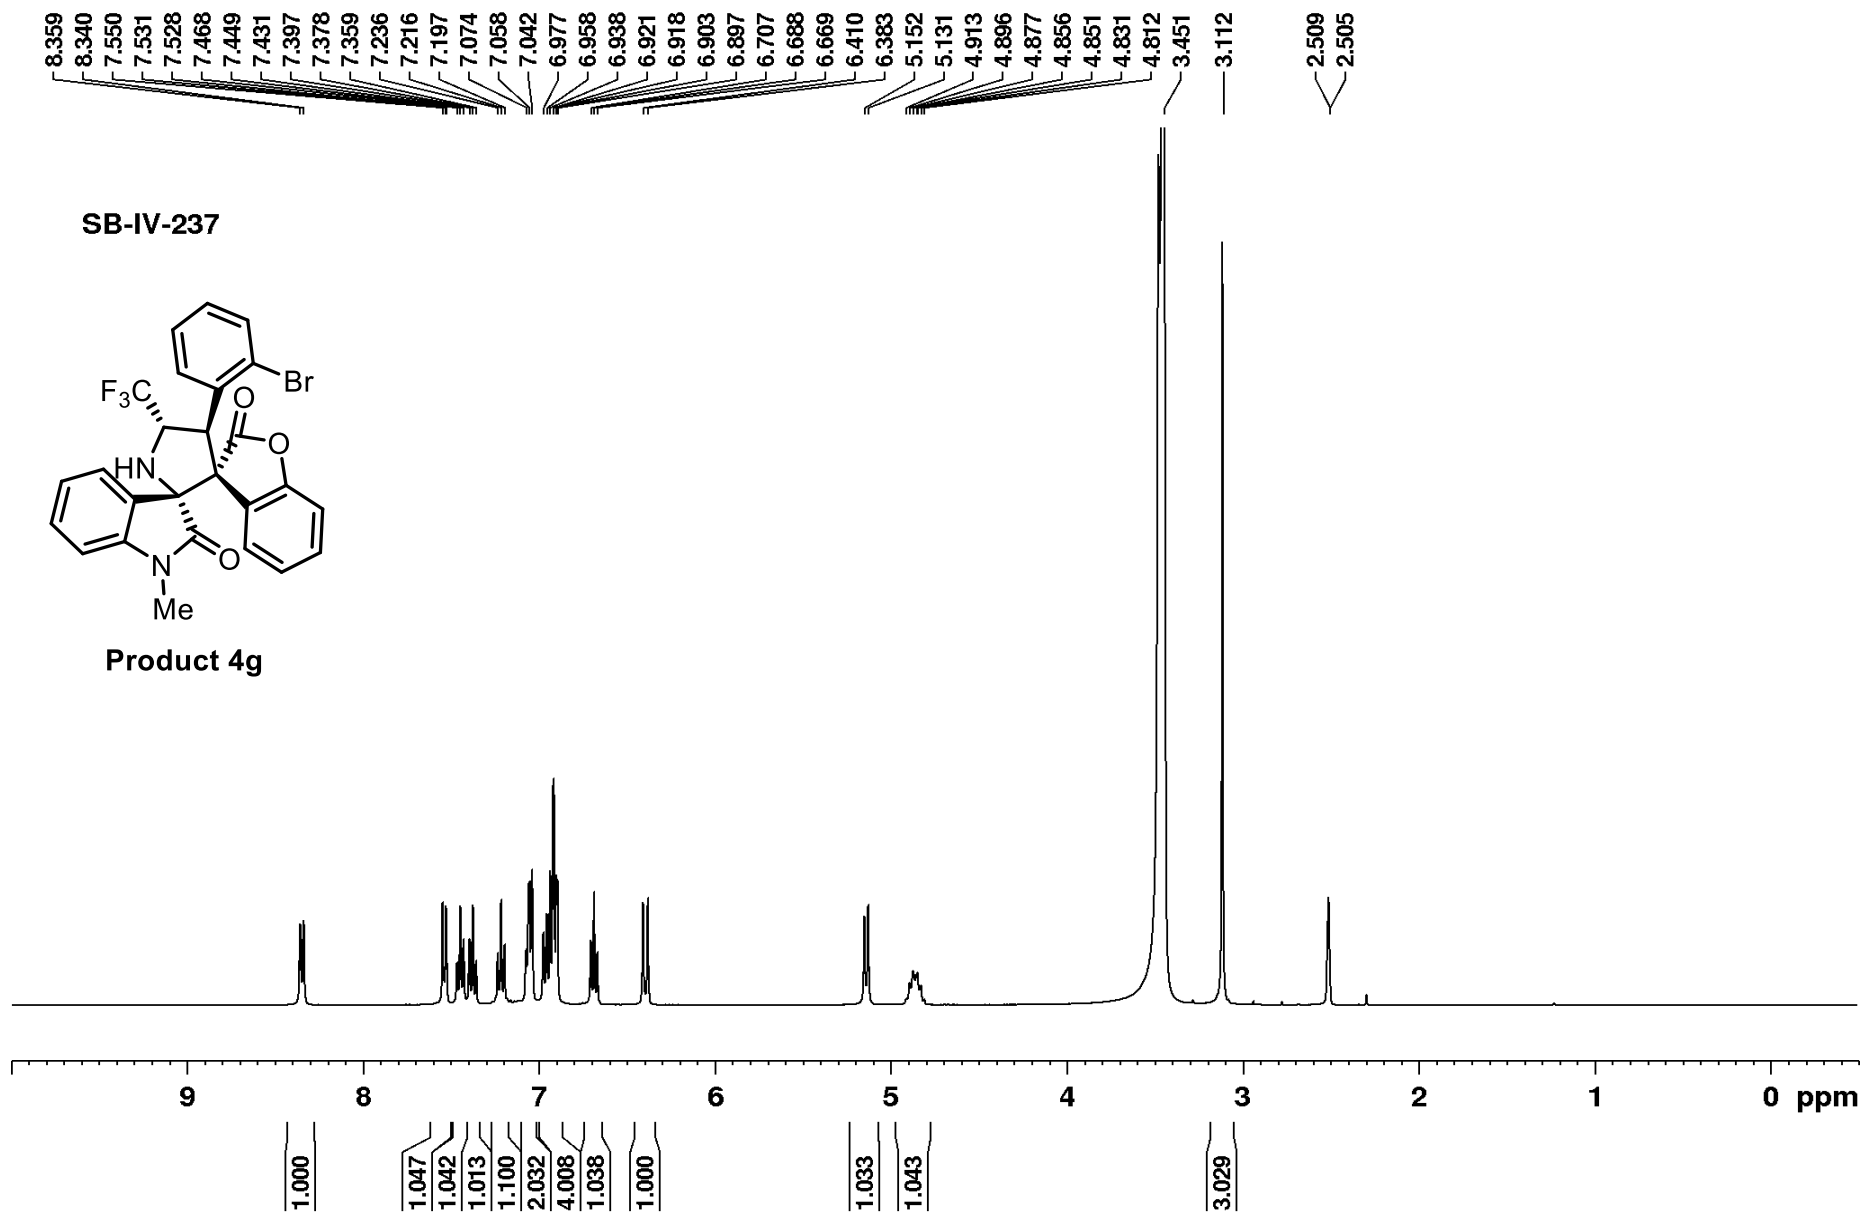



SB-IV-237

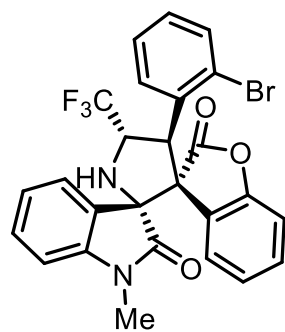

Product 4g

— -70.53

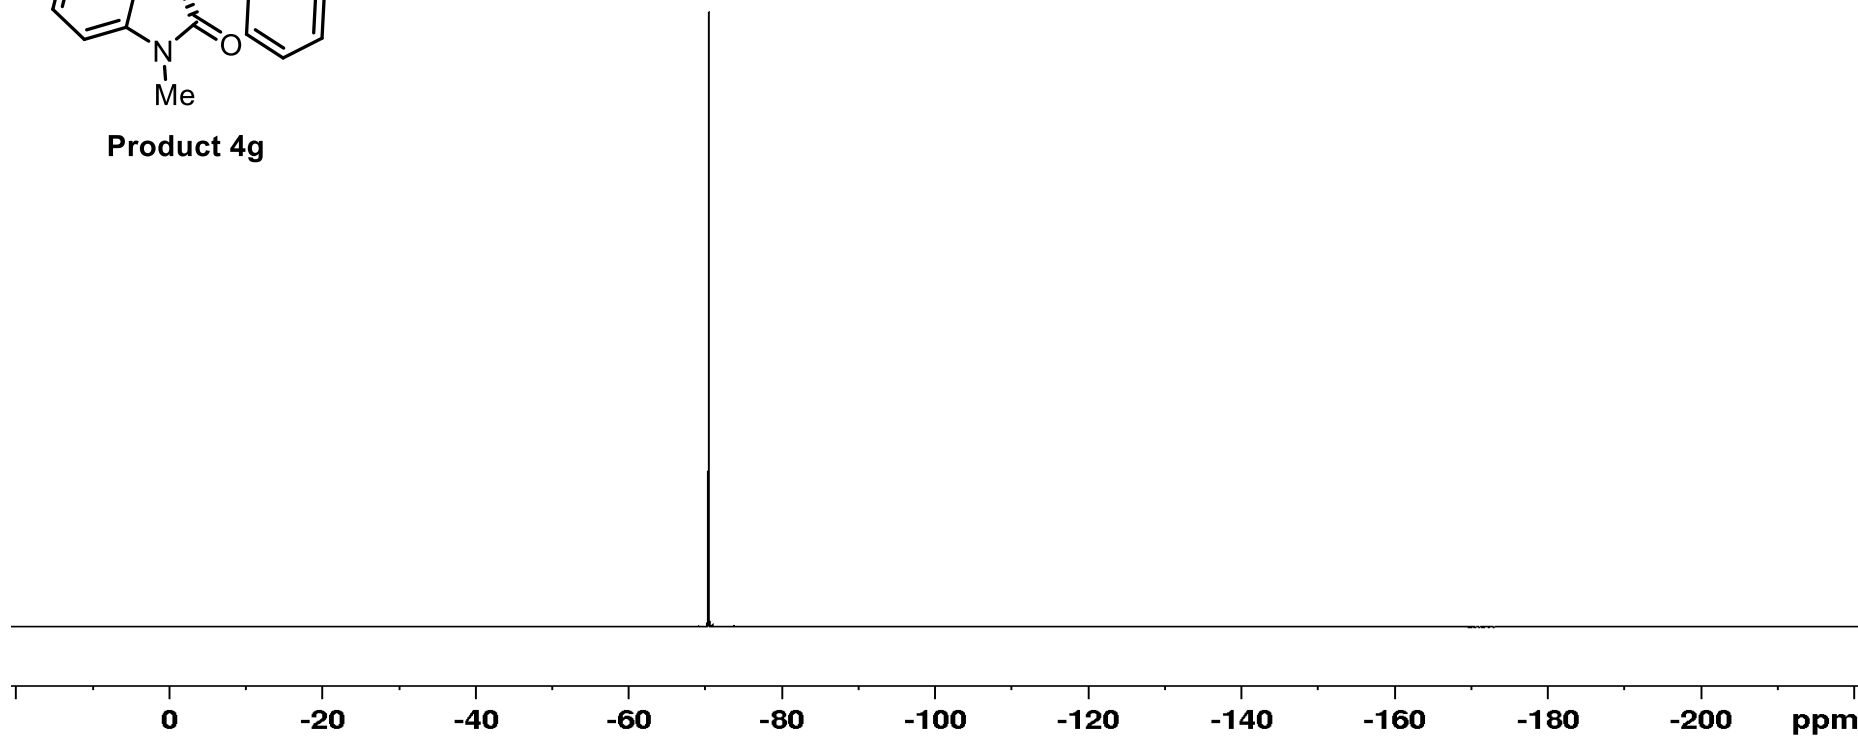

S53

SB-IV-237

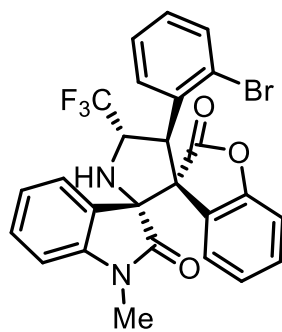

Product 4g

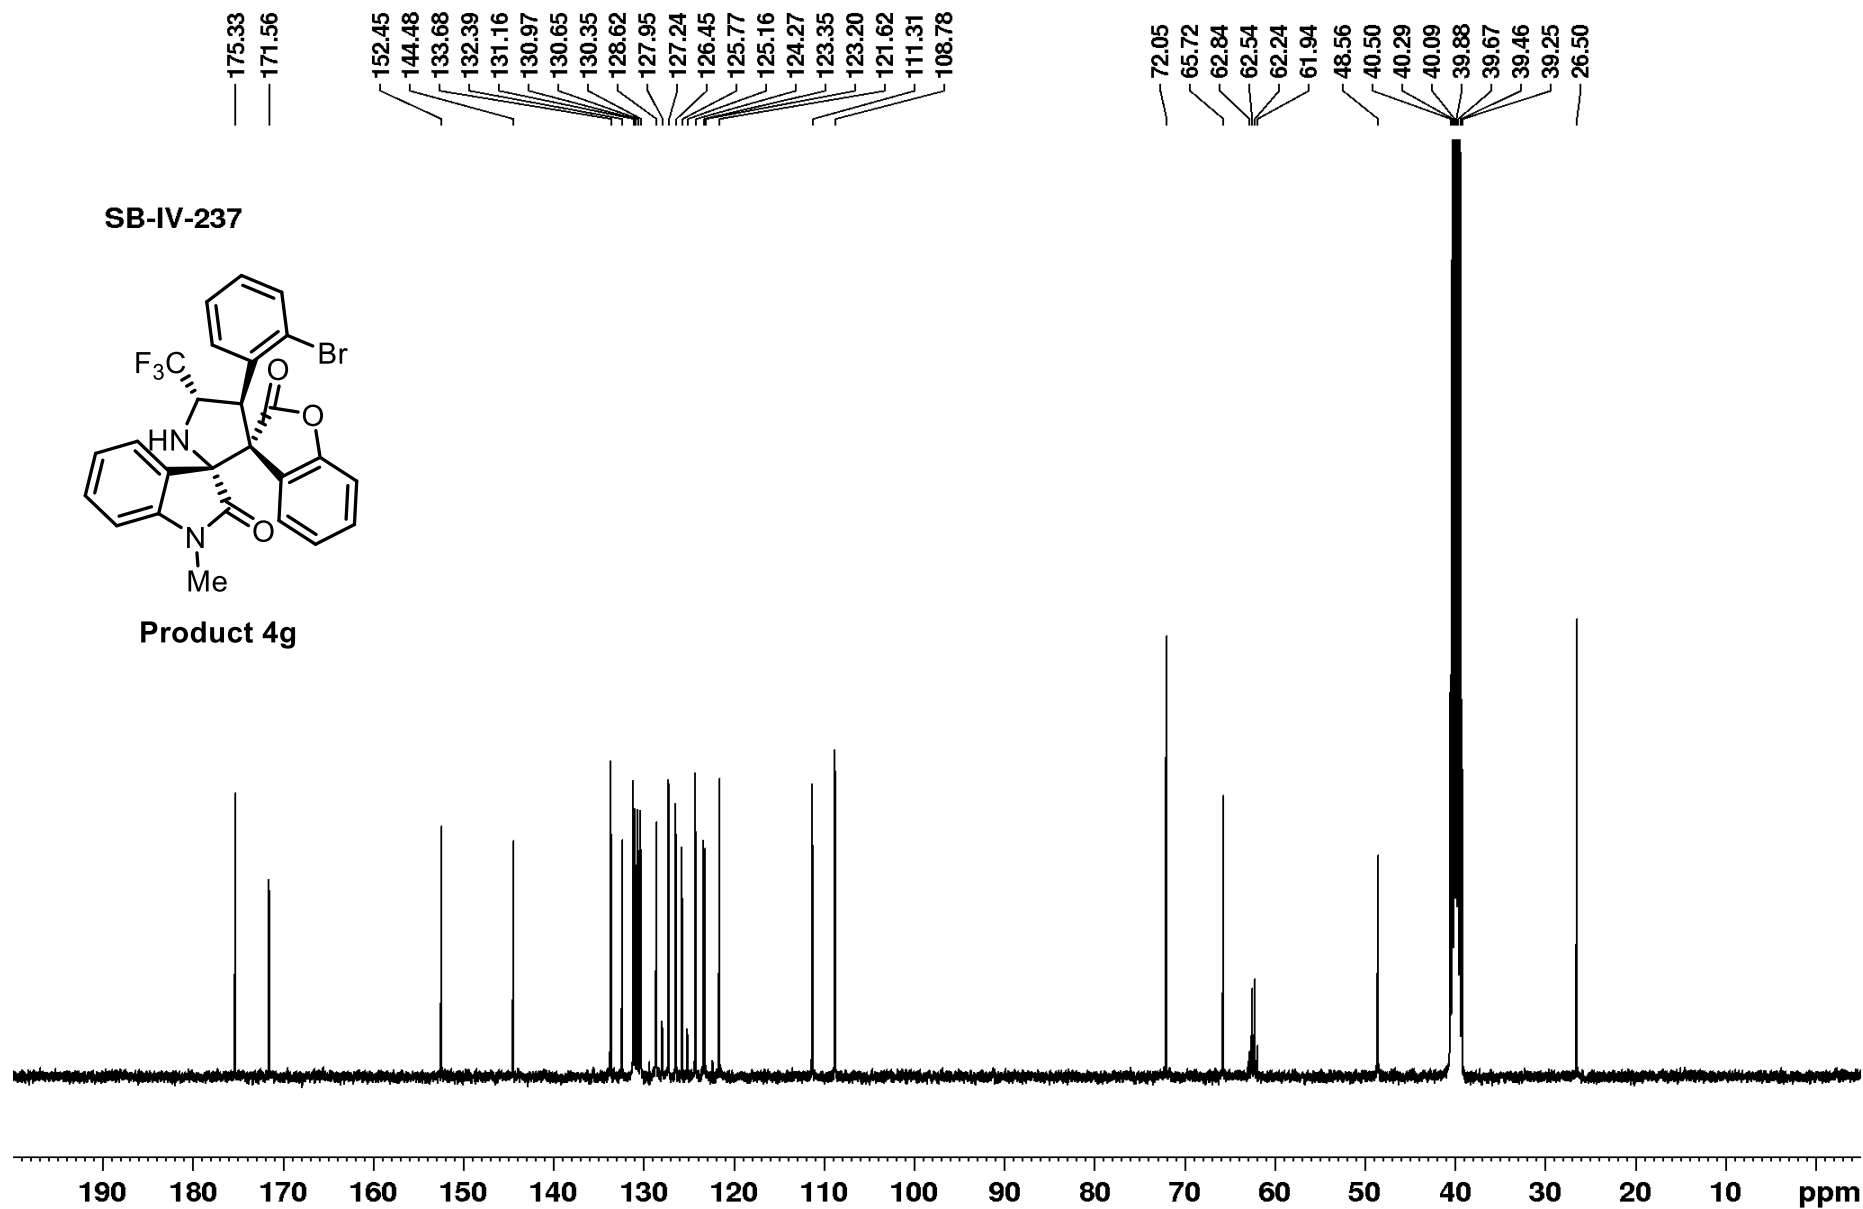

SB-IV-237

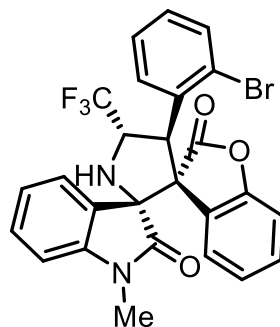

Product 4g

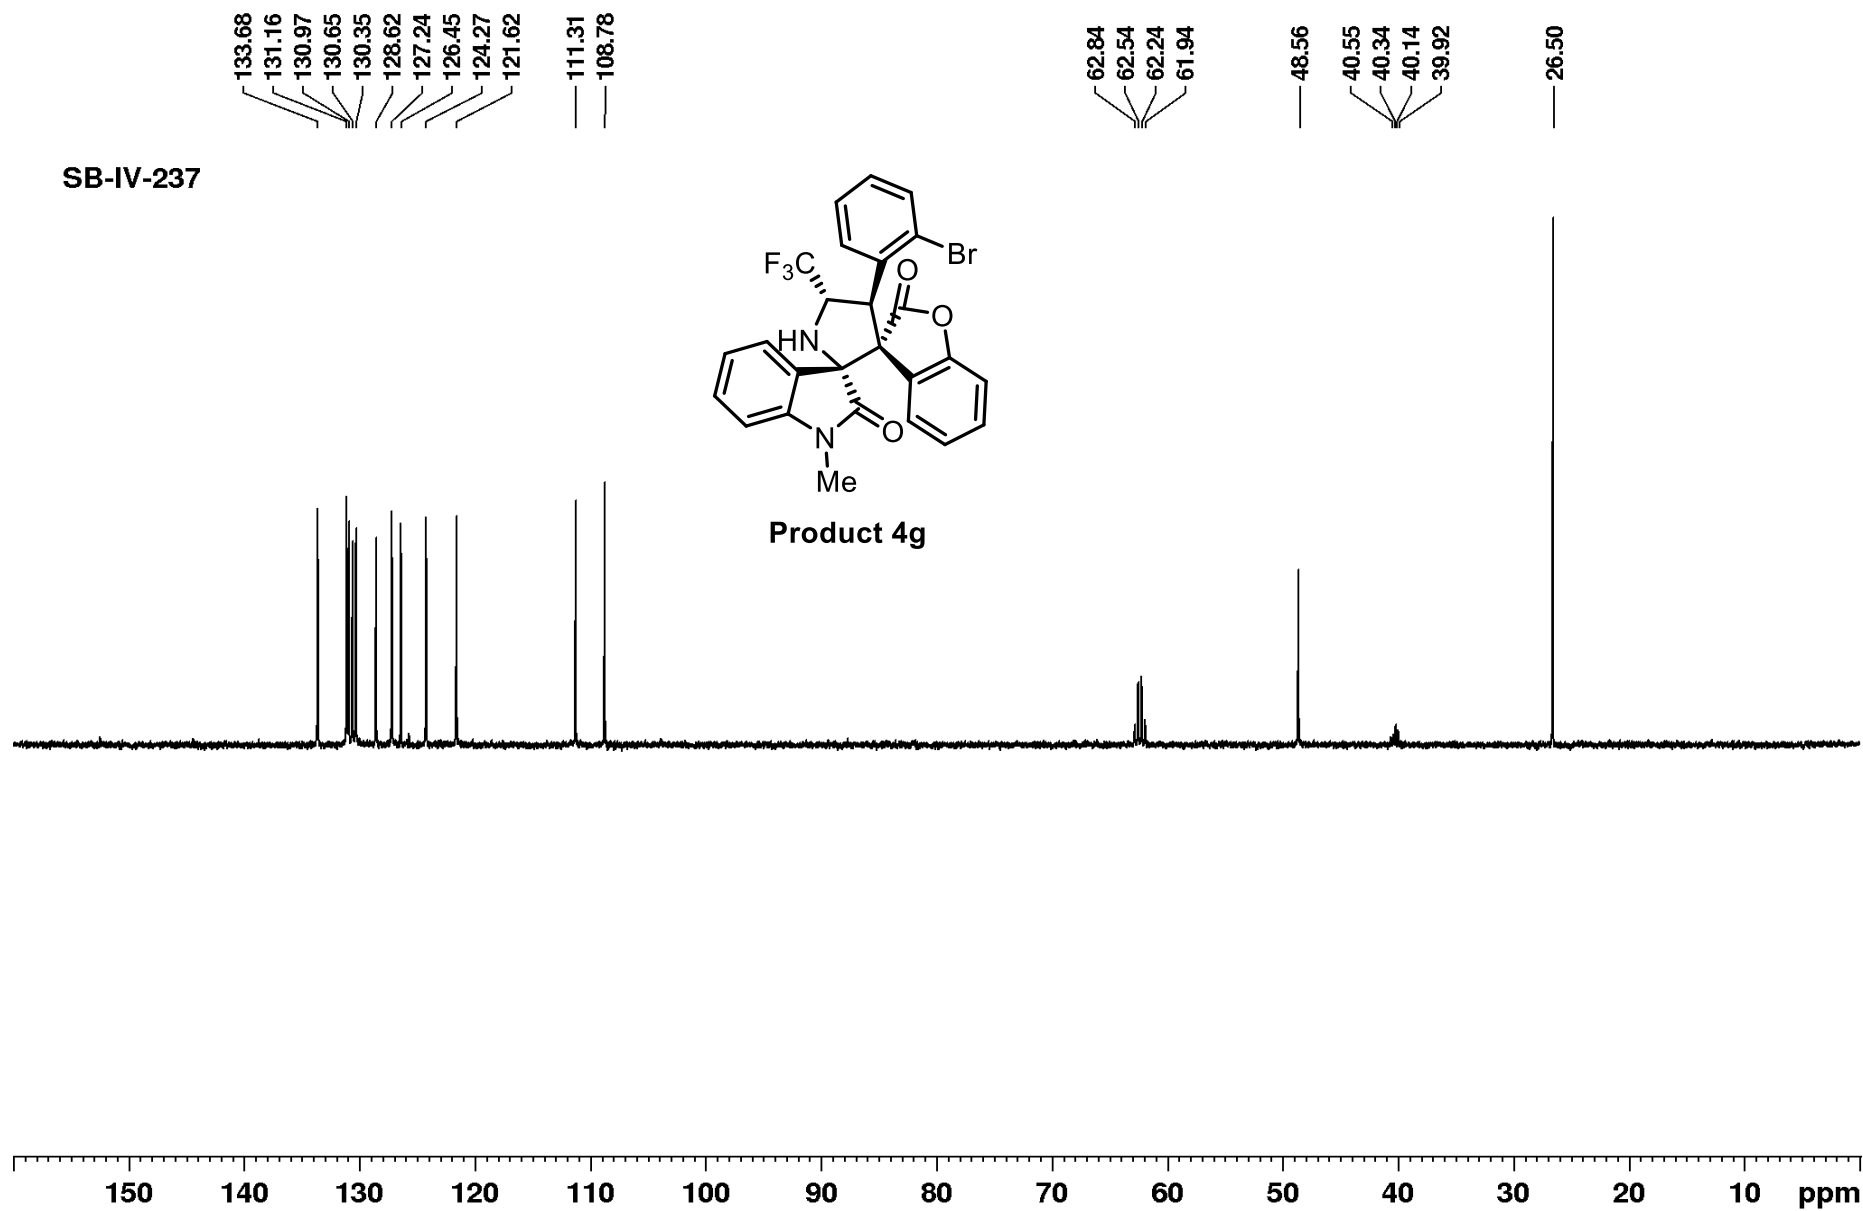

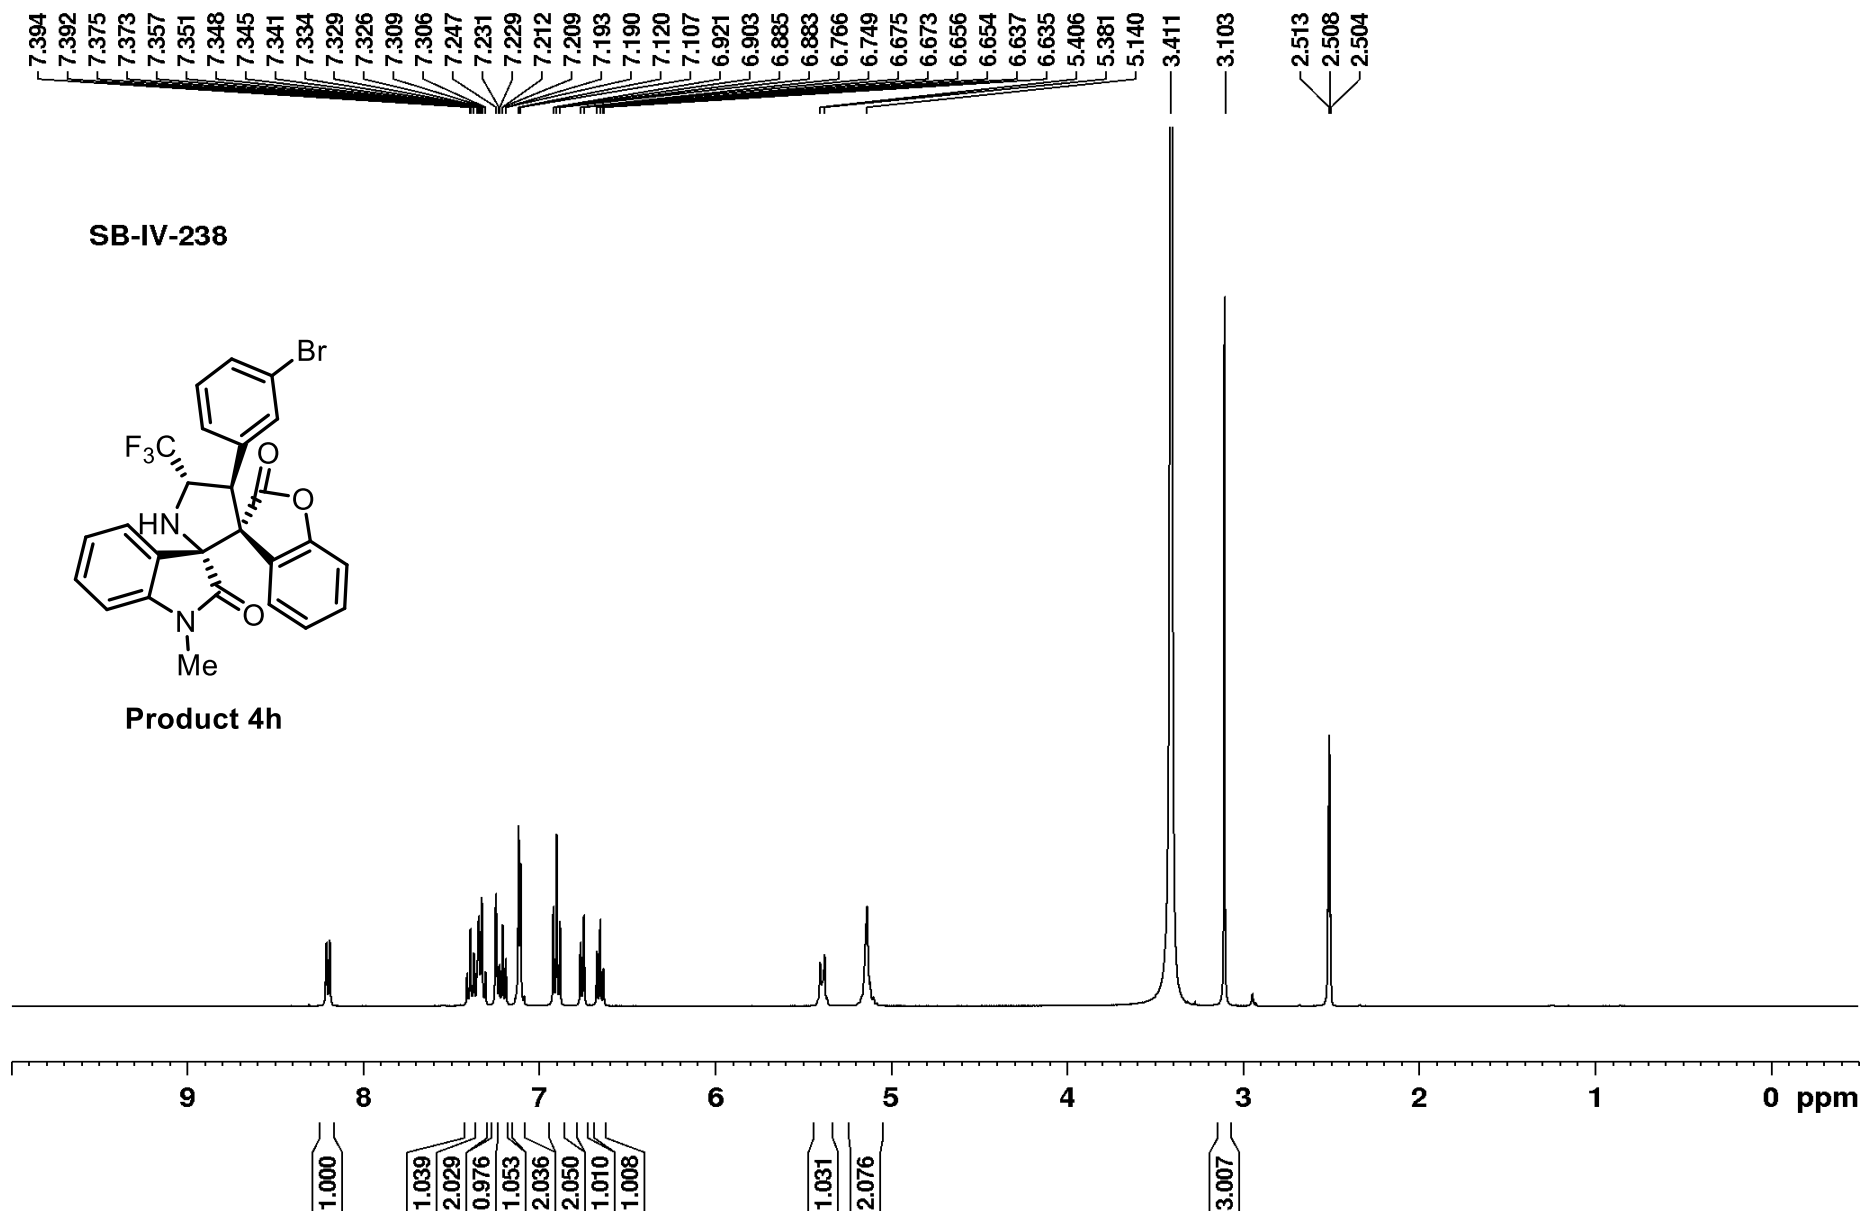

**SB-IV-238**

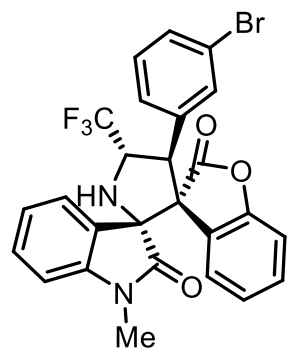

**Product 4h**

— -70.53

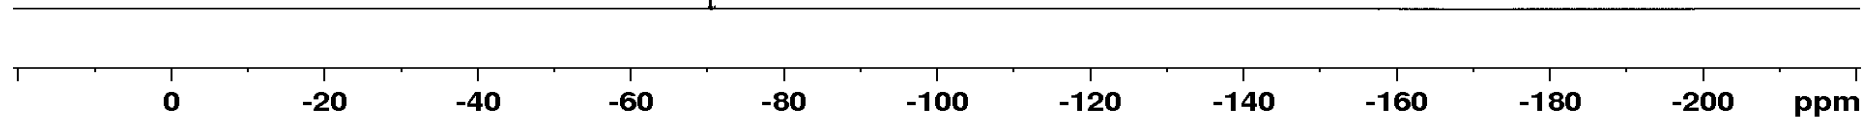

S57

SB-IV-238

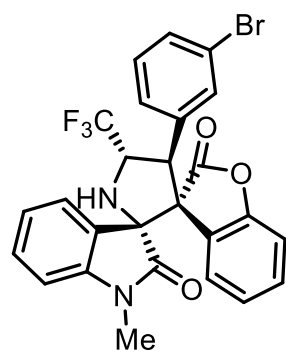

Product 4h

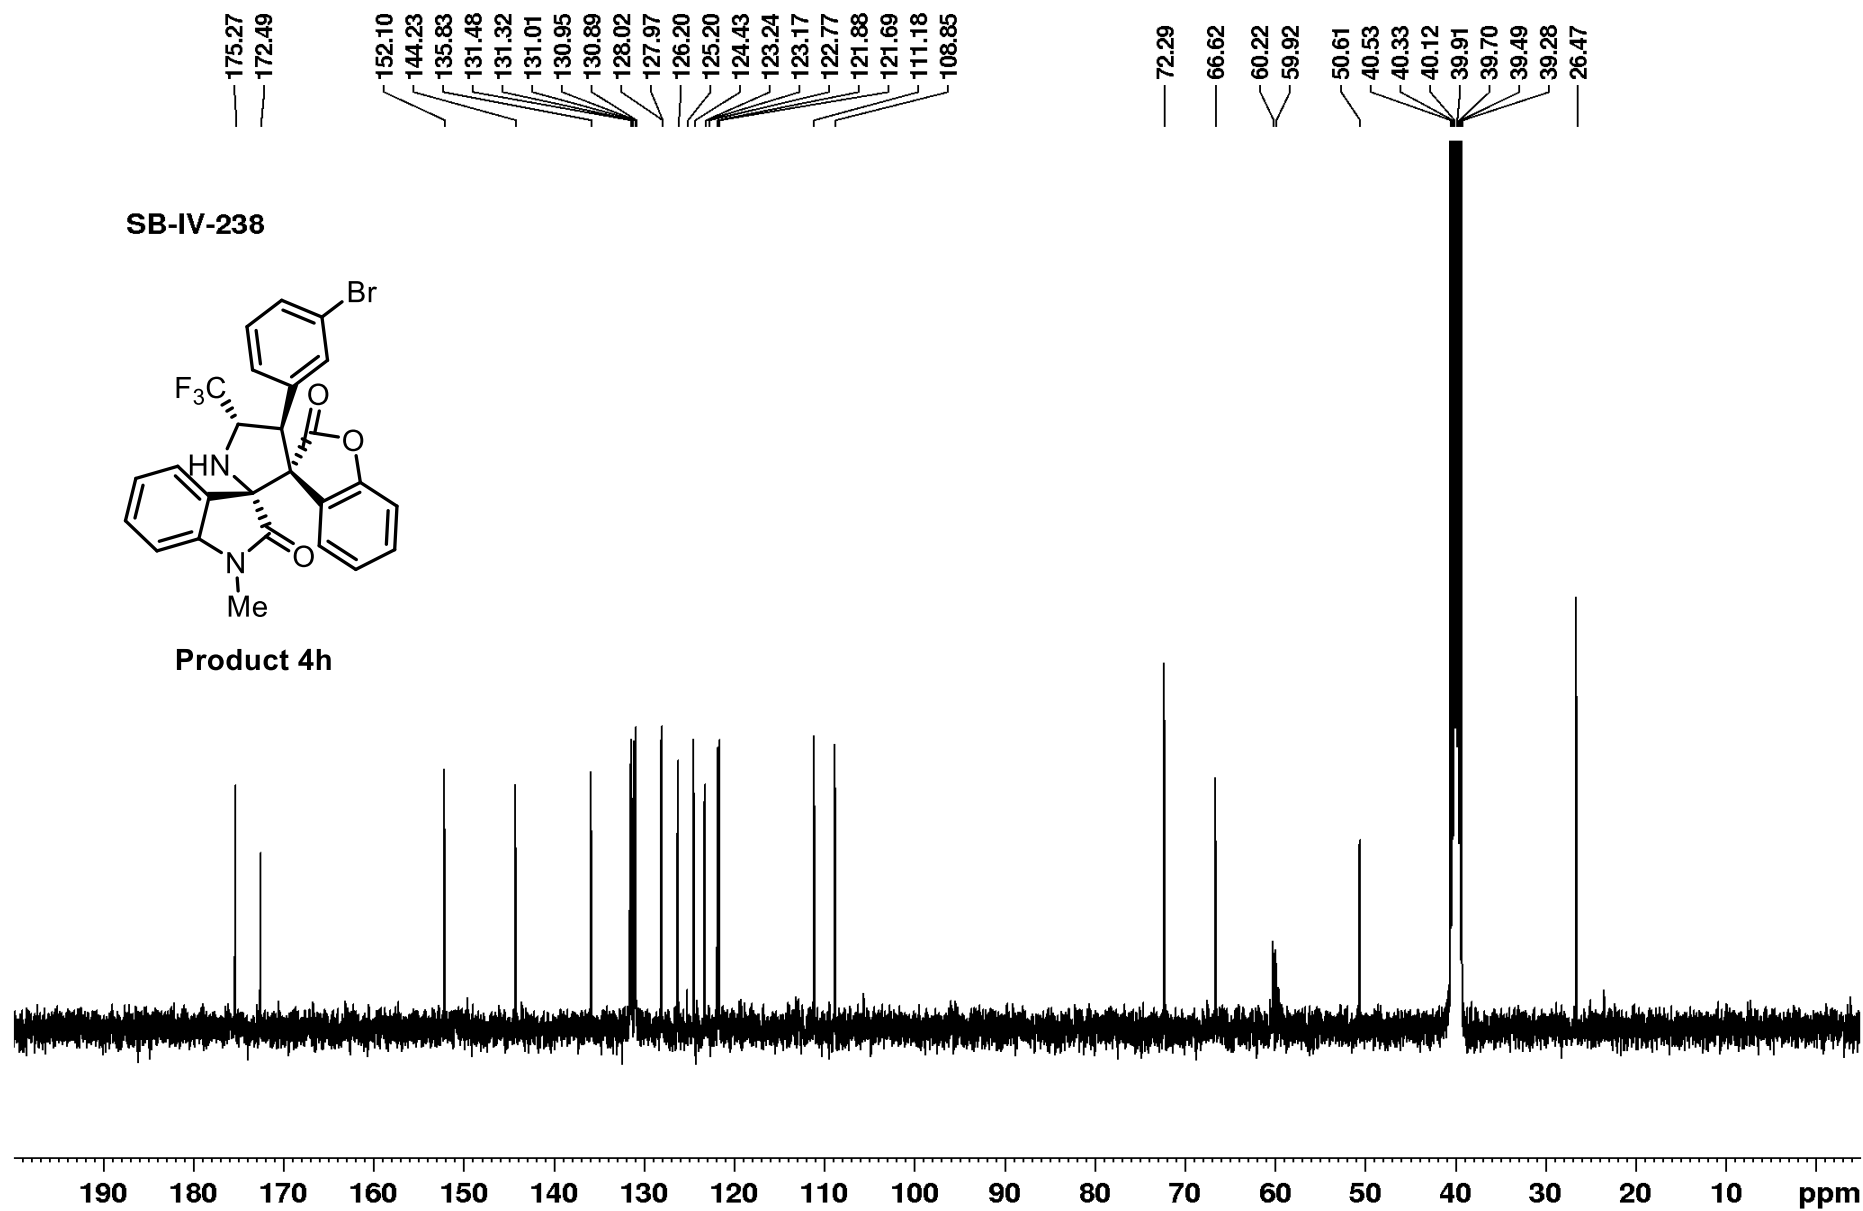

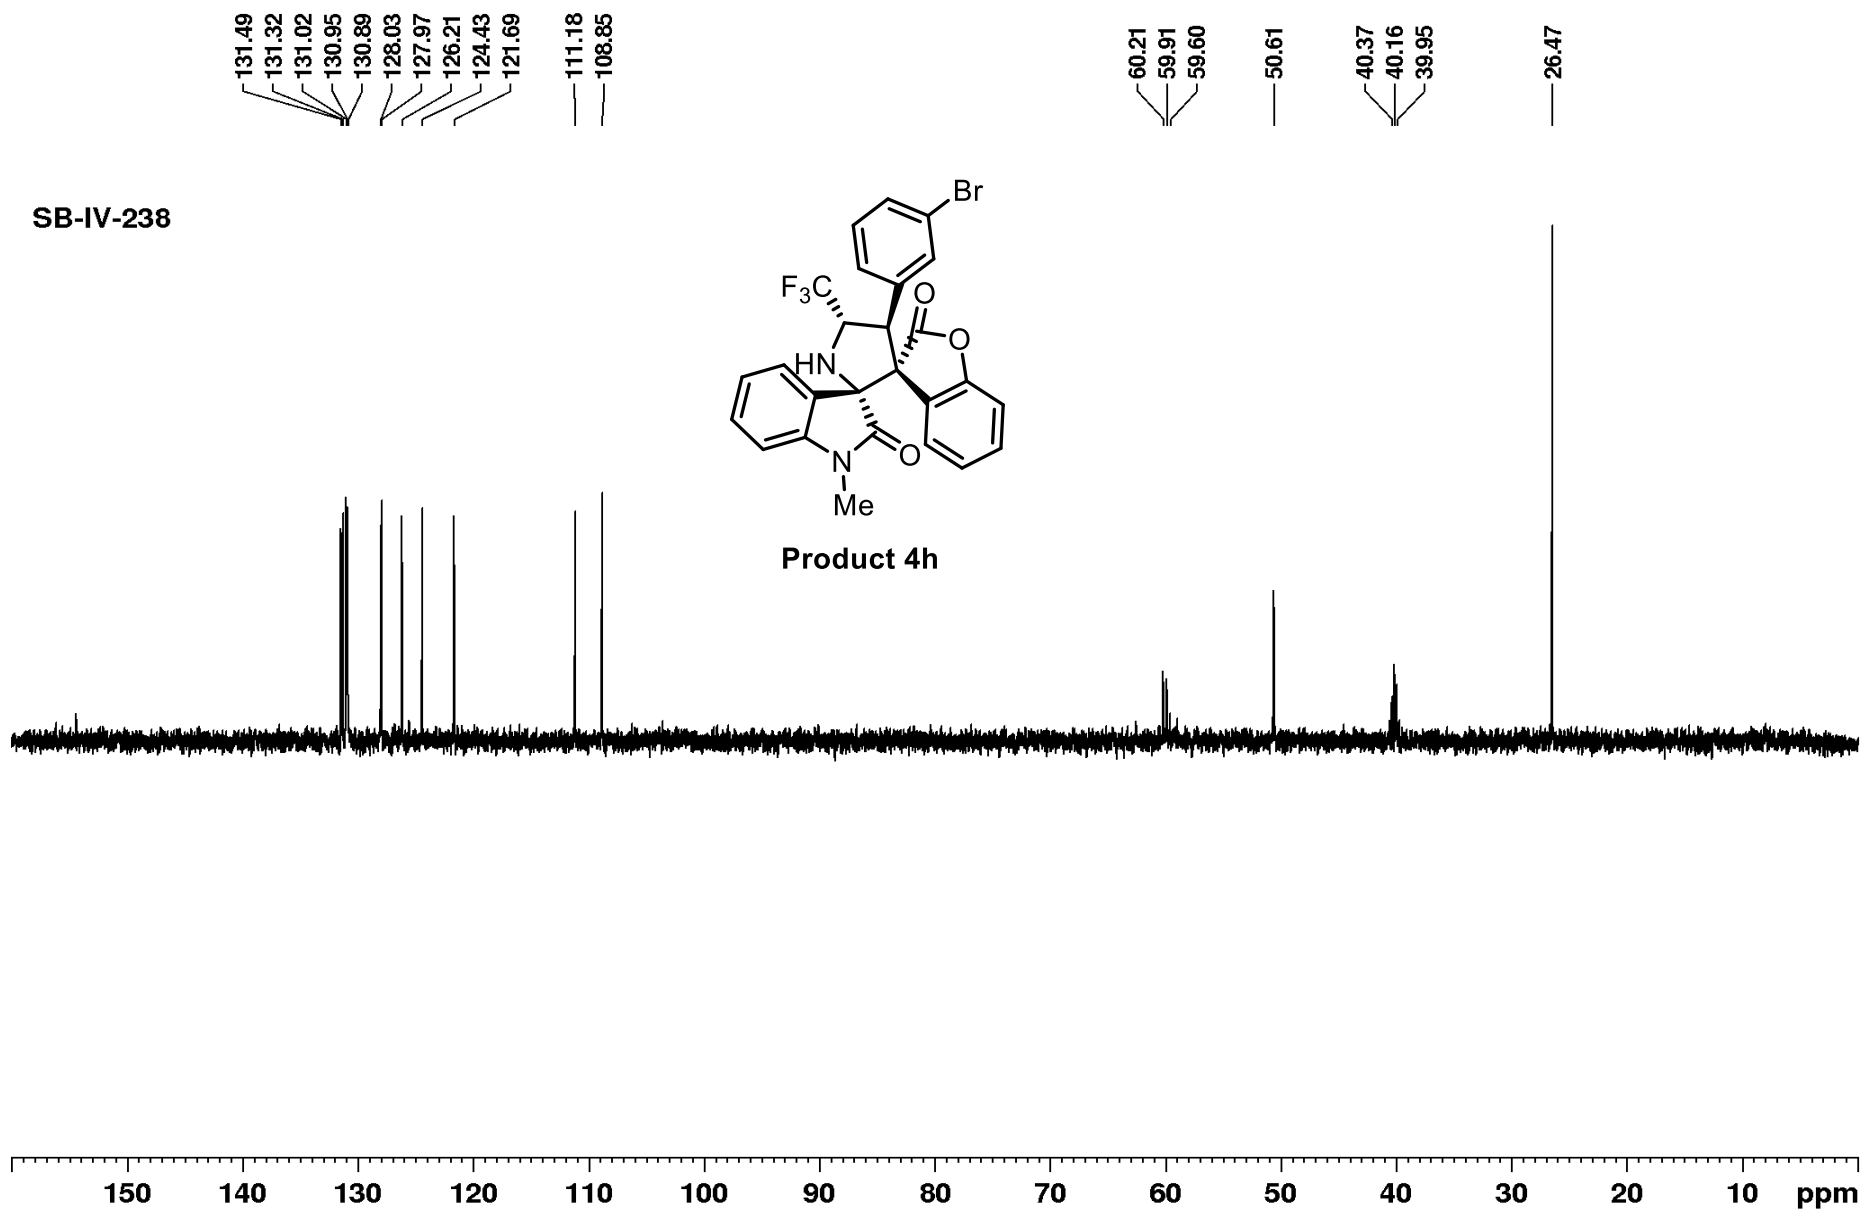

8.253  
8.234  
7.435  
7.417  
7.399  
7.363  
7.361  
7.343  
7.342  
7.324  
7.270  
7.268  
7.251  
7.249  
7.231  
7.230  
7.022  
7.001  
6.984  
6.961  
6.940  
6.914  
6.894  
6.823  
6.804  
6.717  
6.698  
6.679  
5.452  
5.427  
5.130  
5.110  
5.081  
5.061

SB-IV-244

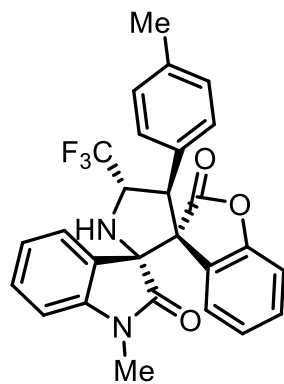

Product 4i

3.459  
3.149  
2.564  
2.560  
2.555  
2.182

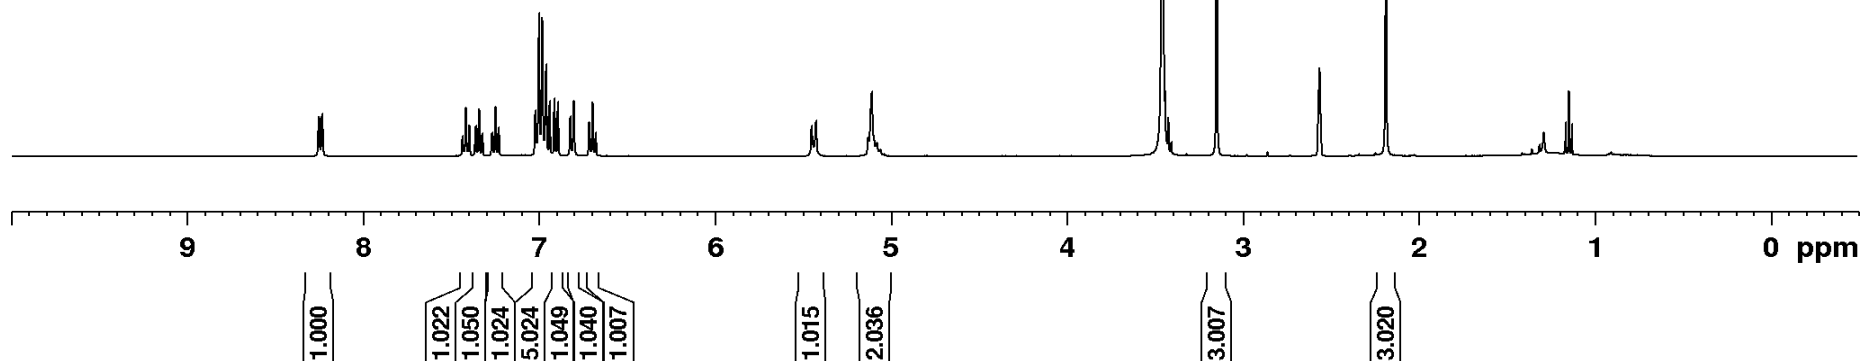



**SB-IV-244**

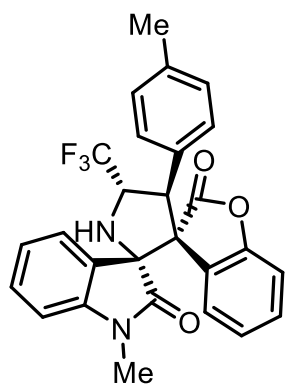

**Product 4i**

— -70.38

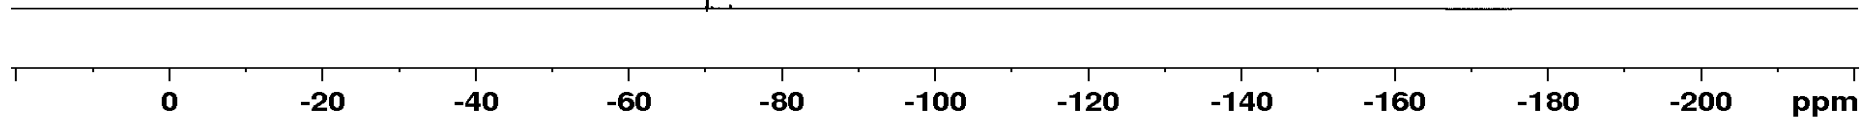

SB-IV-244

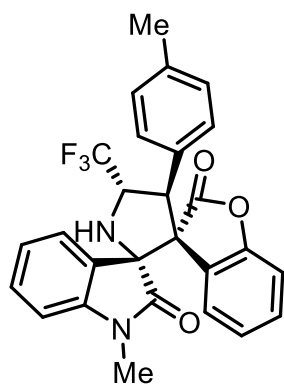

Product 4i

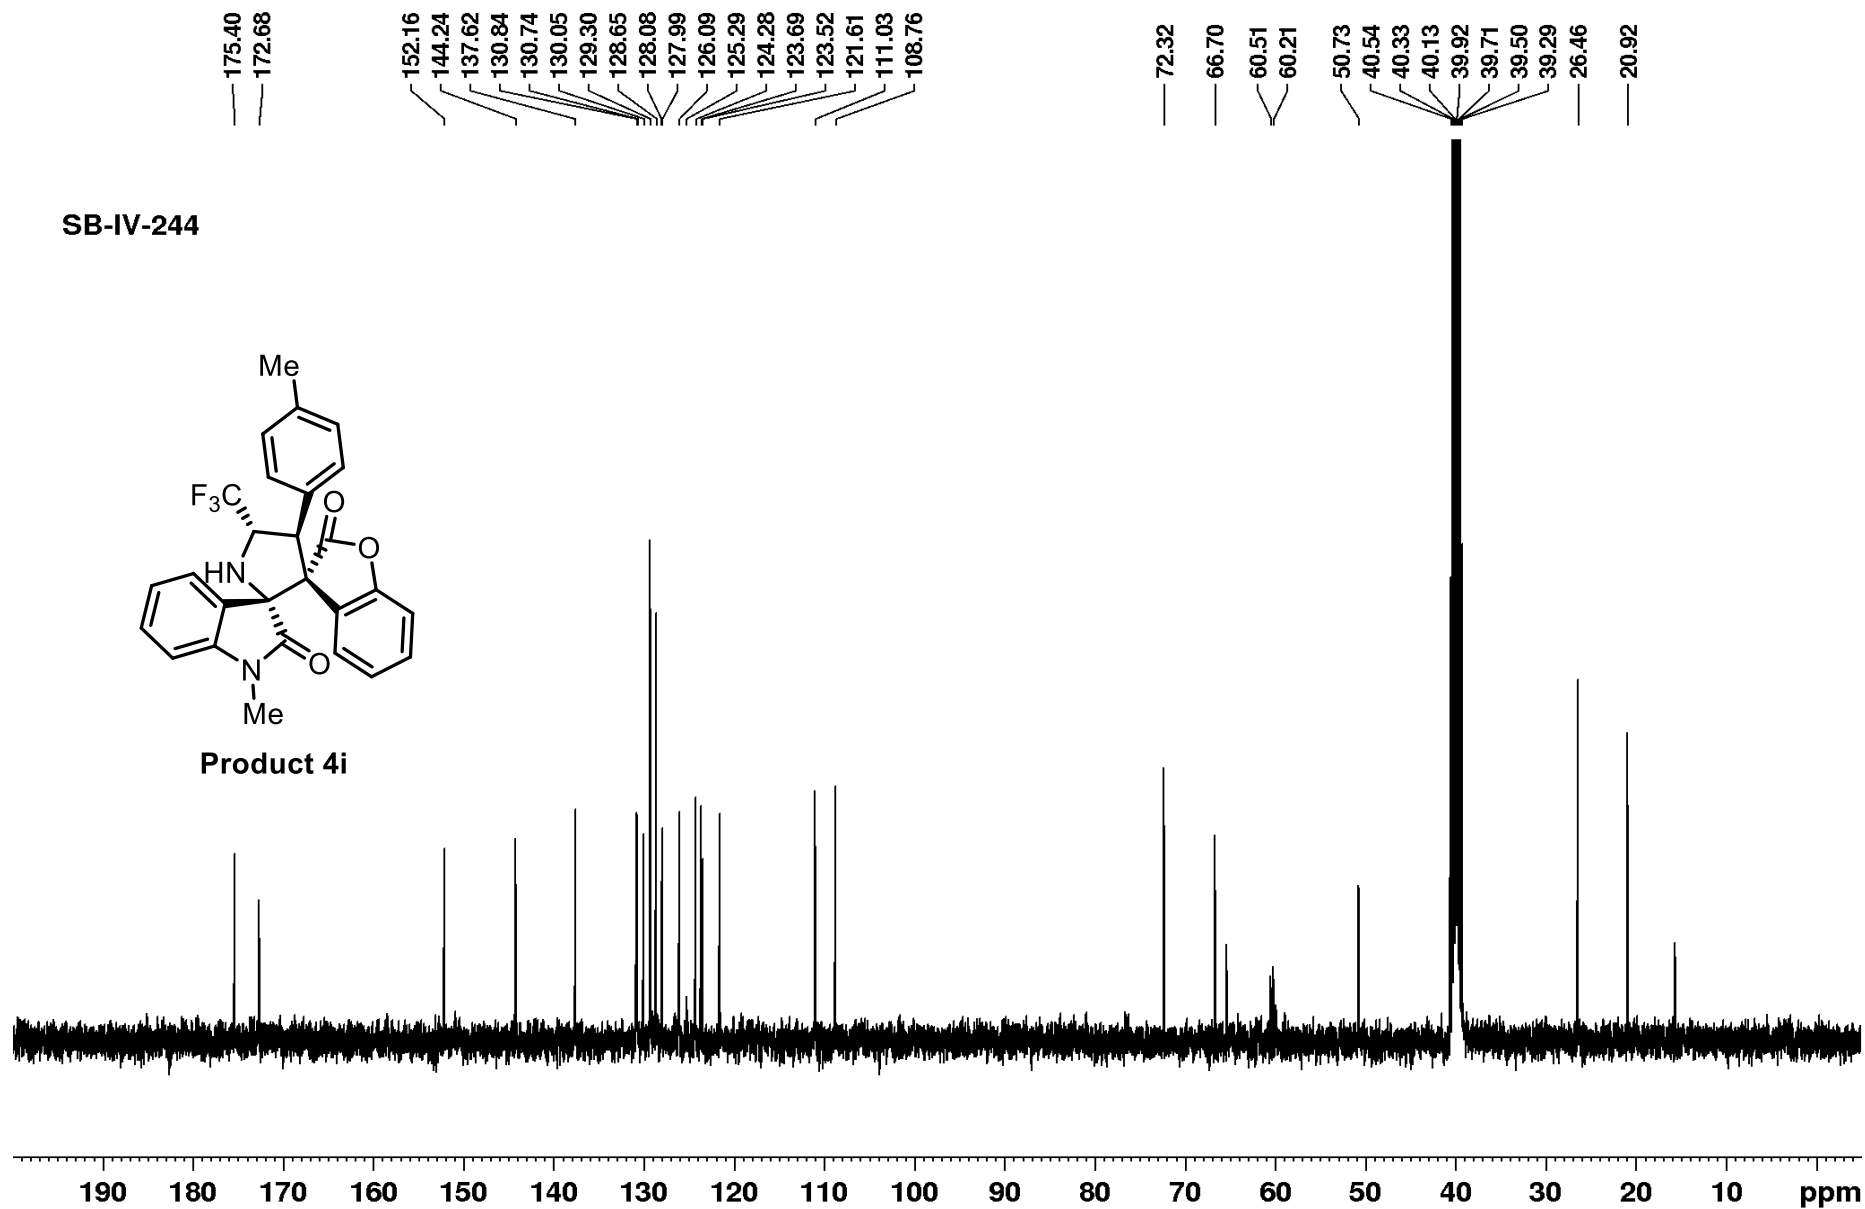

SB-IV-244

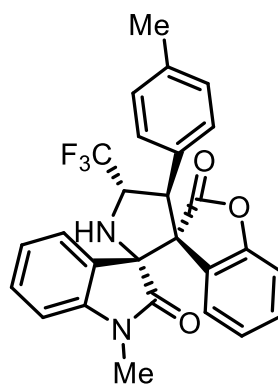

Product 4i

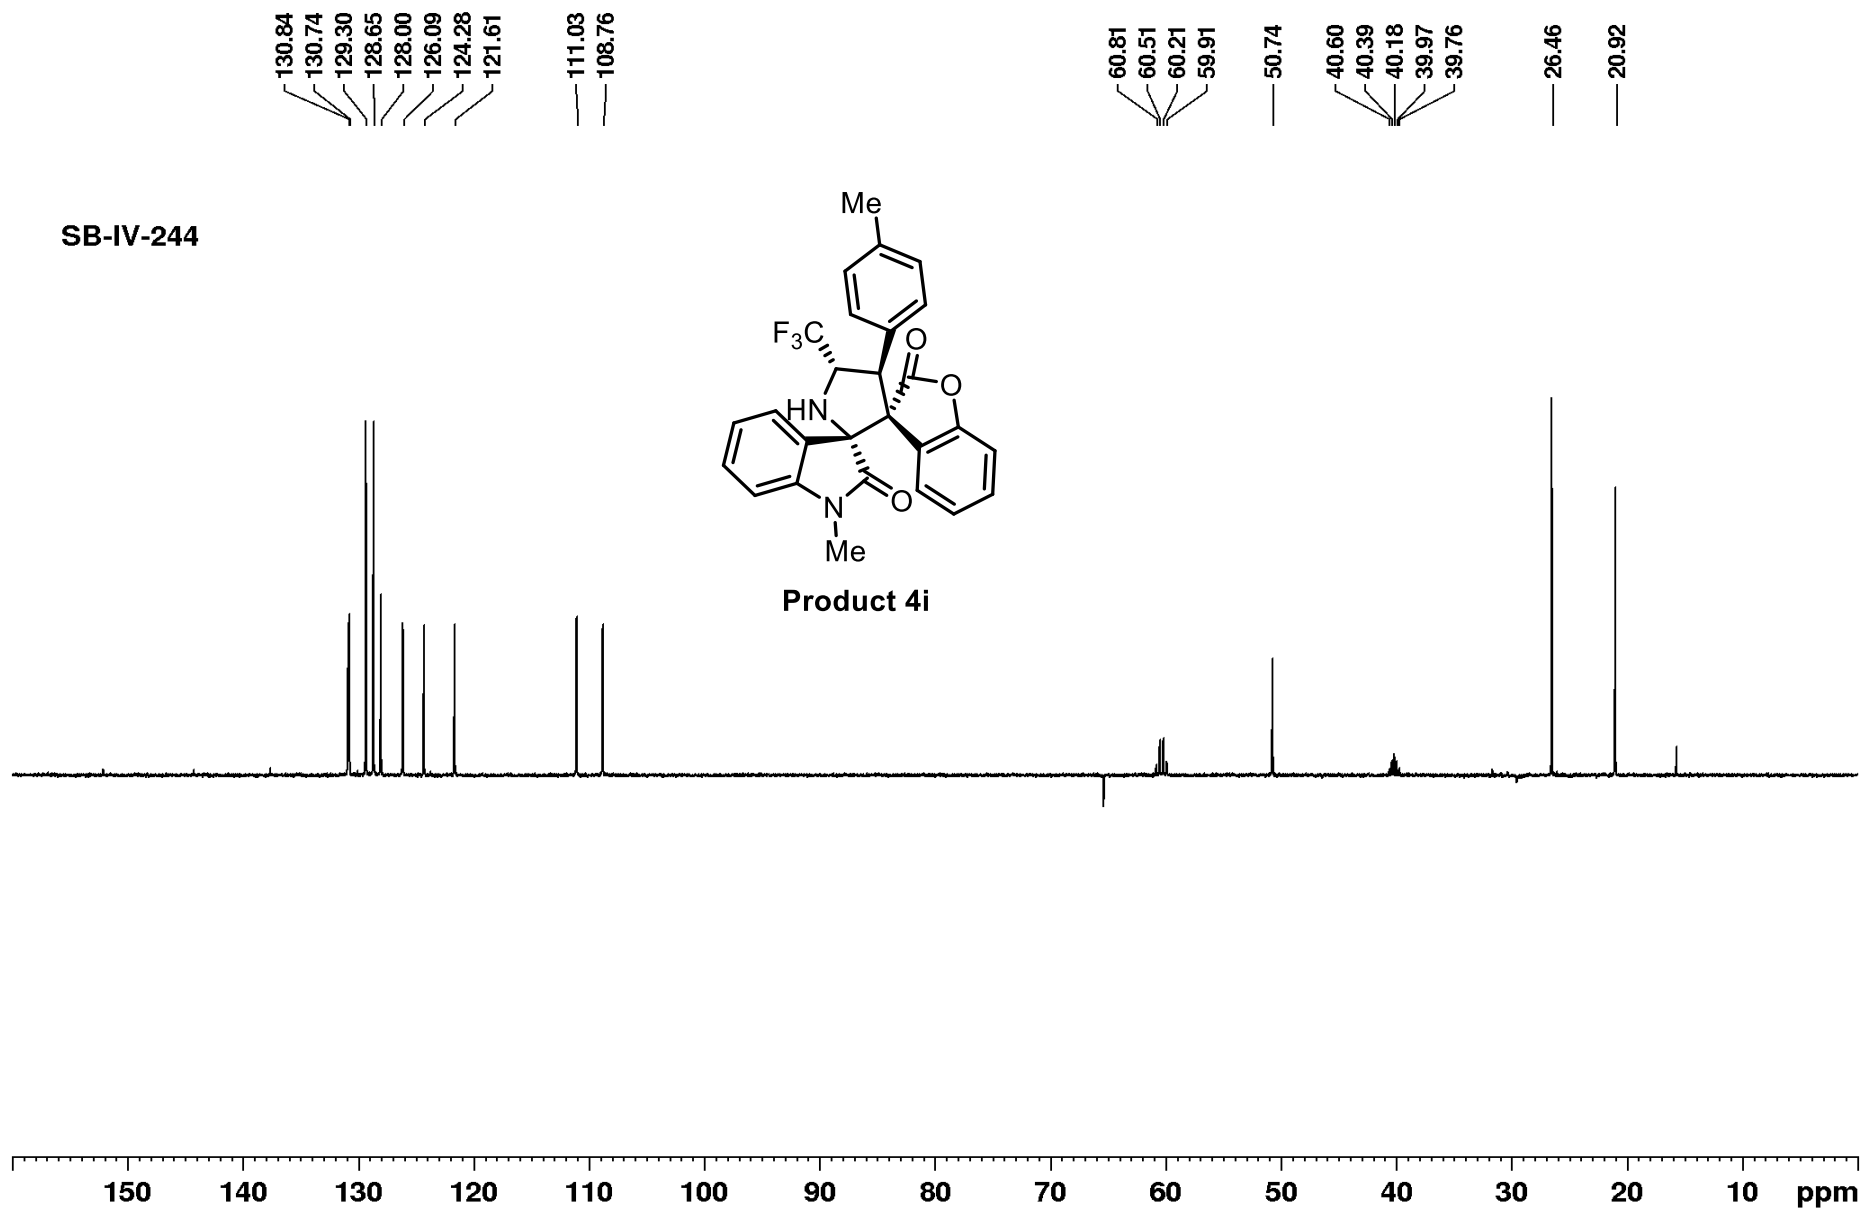

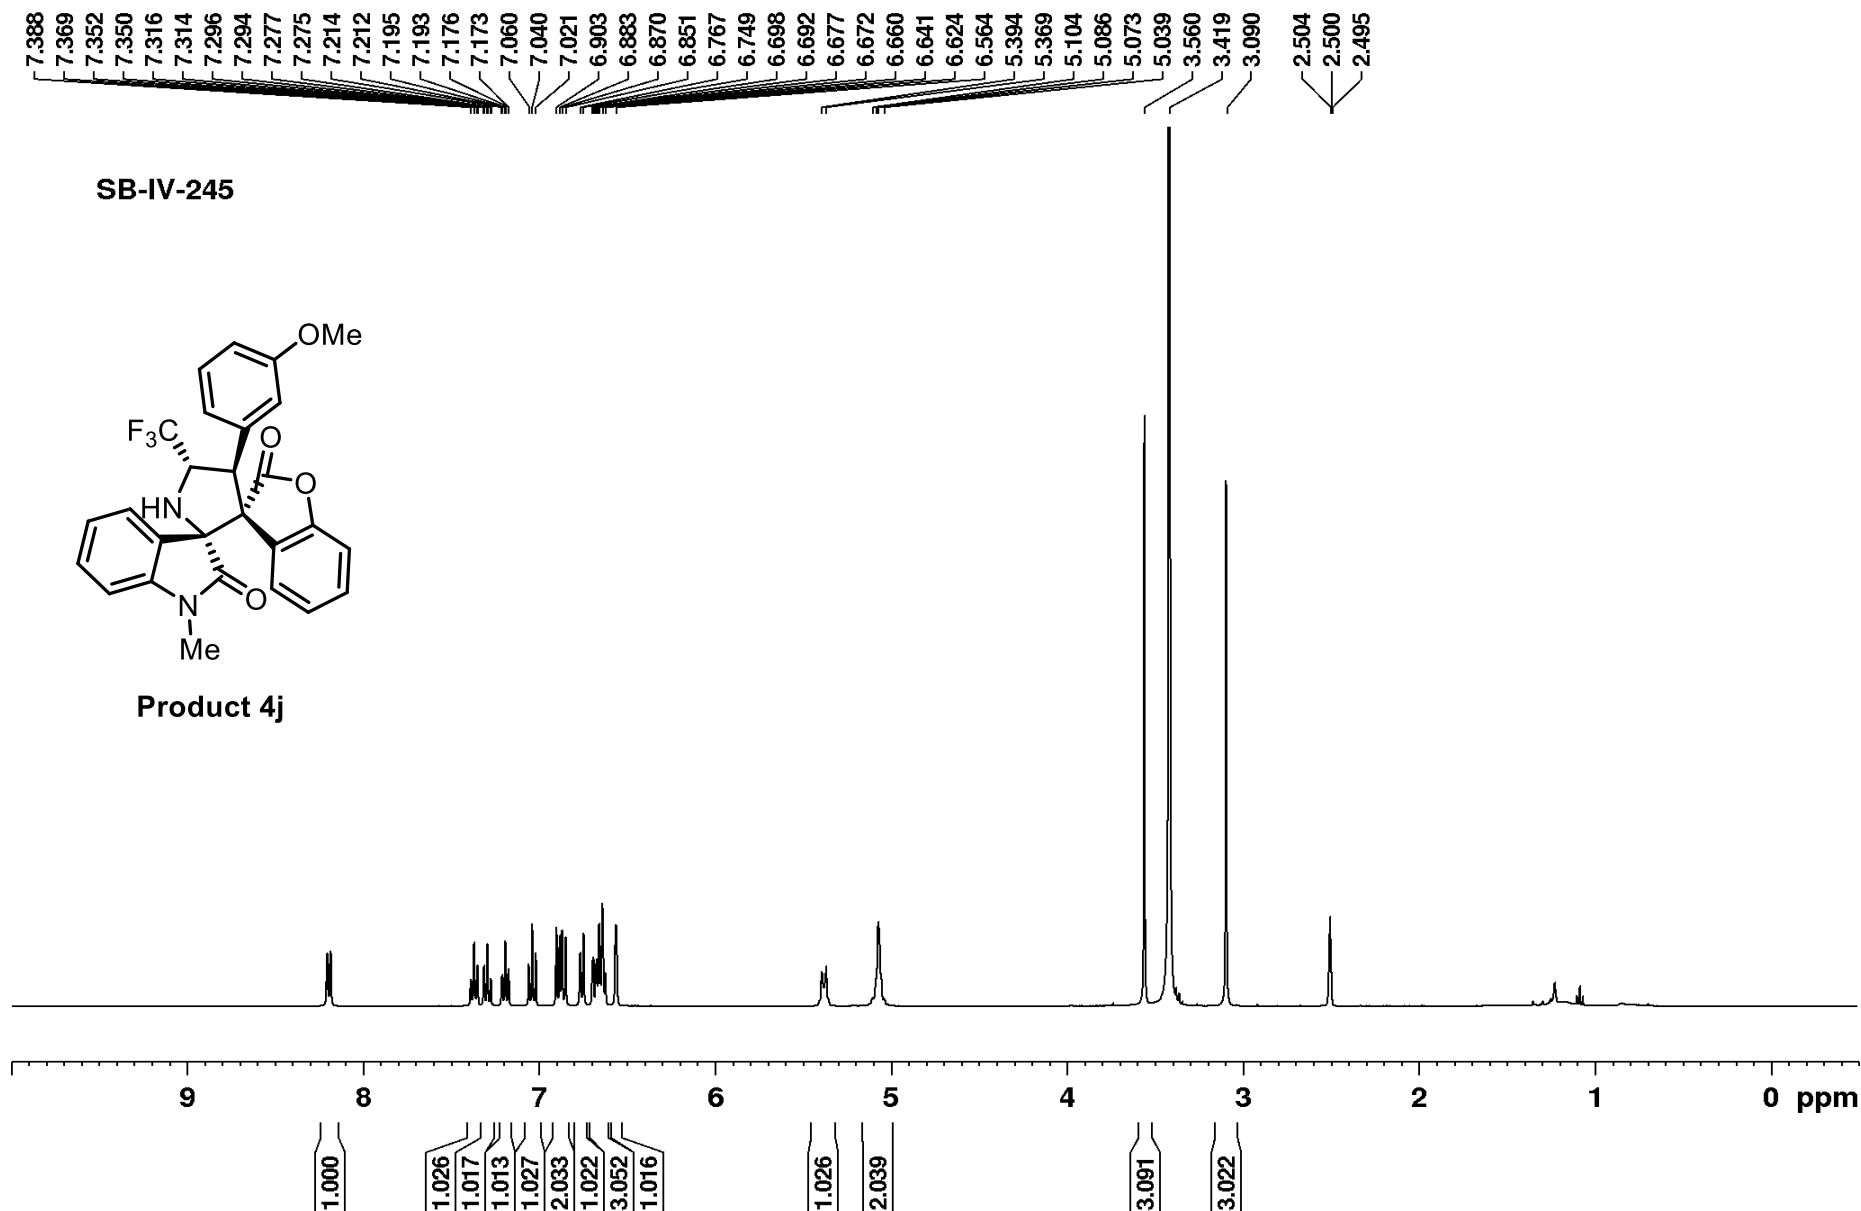

SB-IV-245

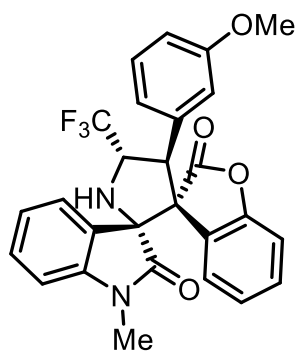

Product 4j

— -70.44

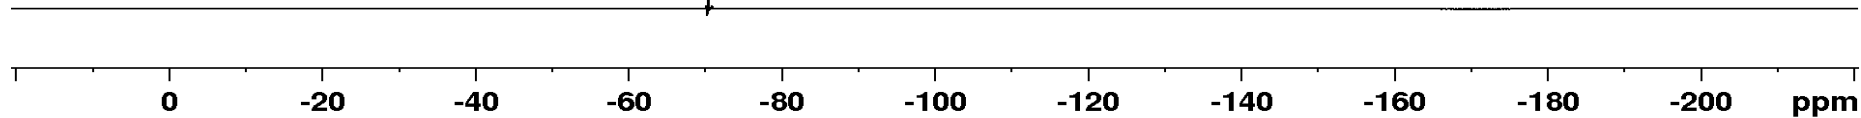

S65

SB-IV-245

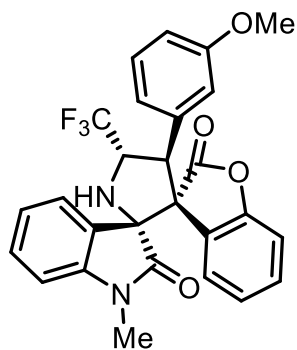

Product 4j

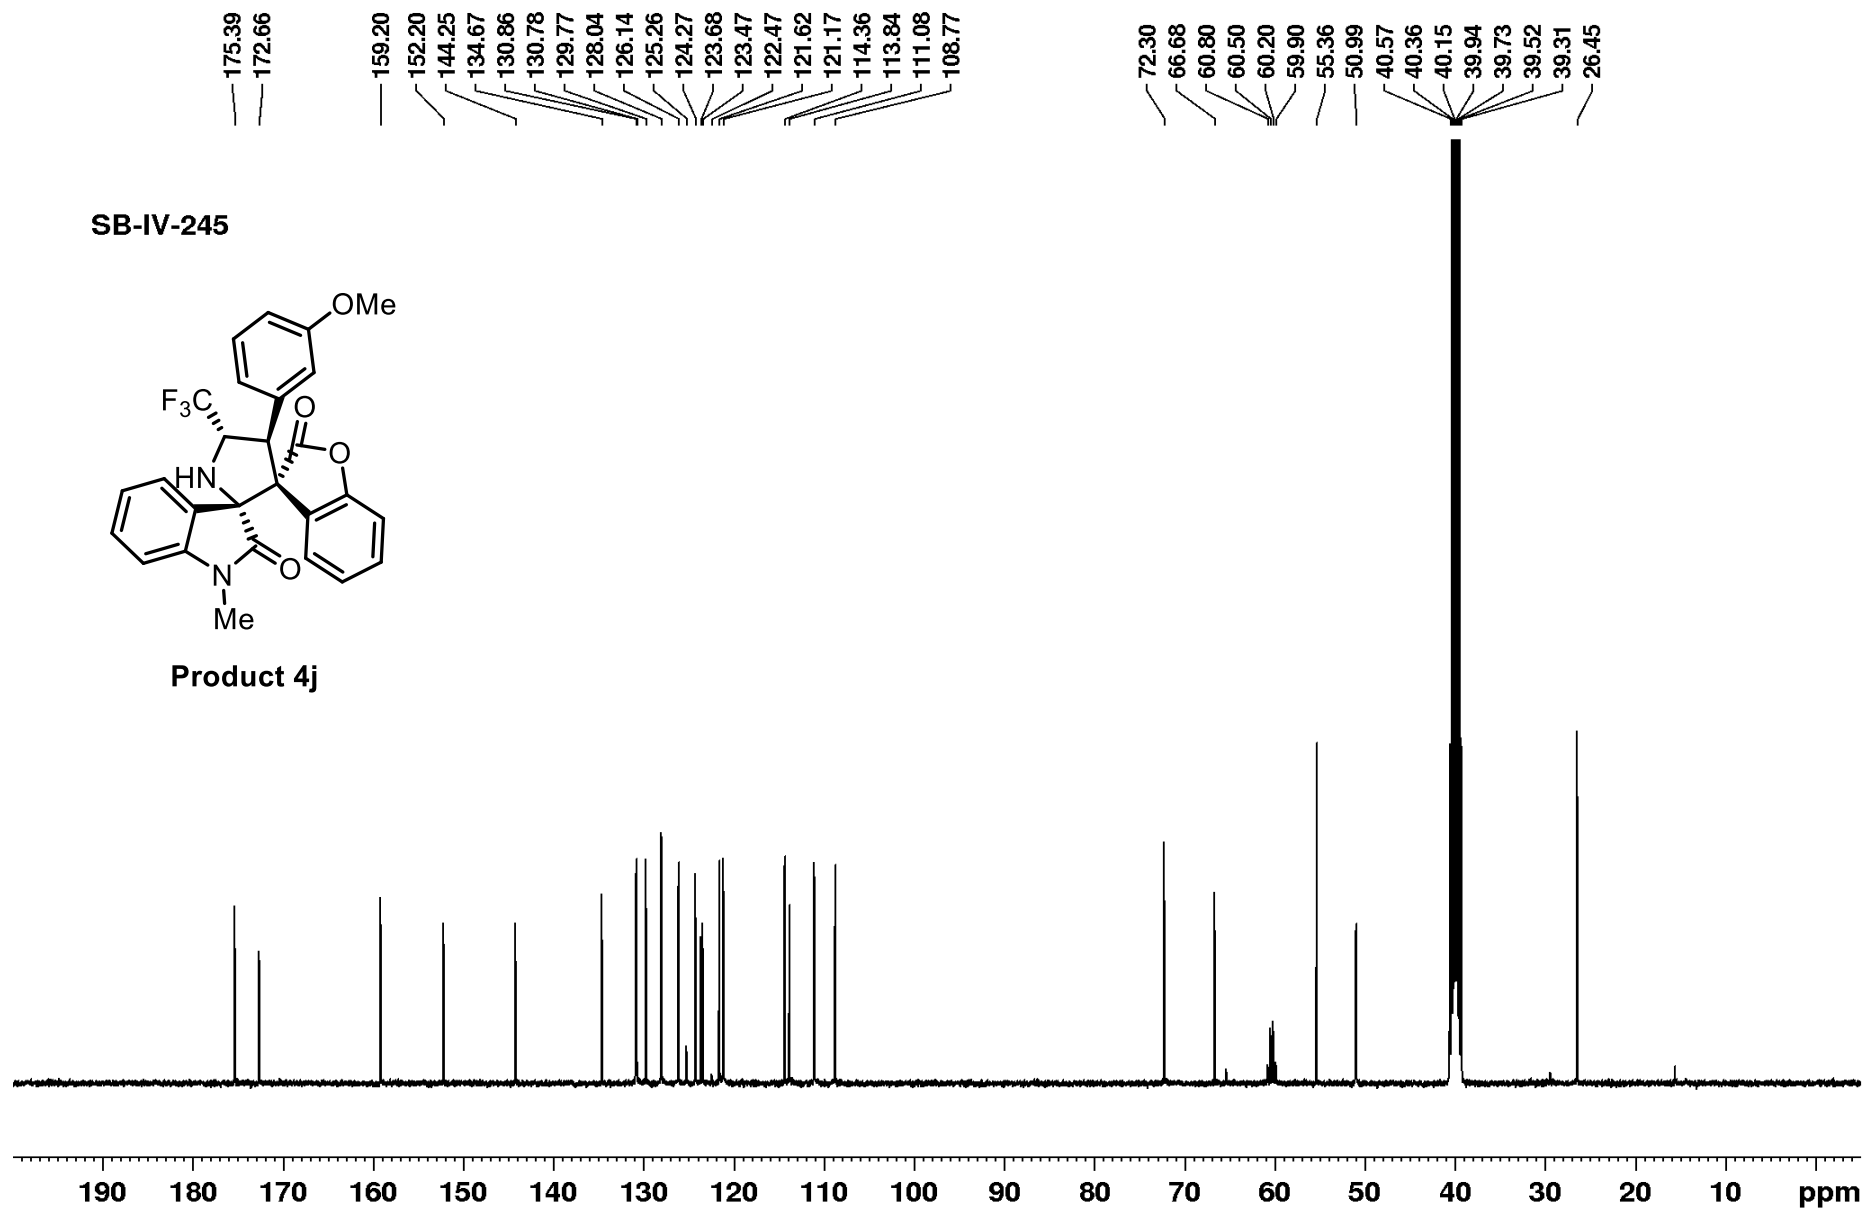

SB-IV-245

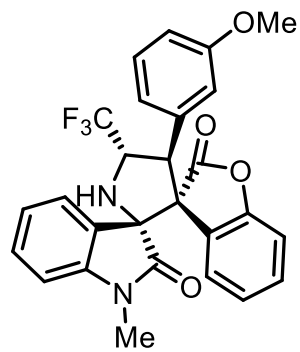

Product 4j

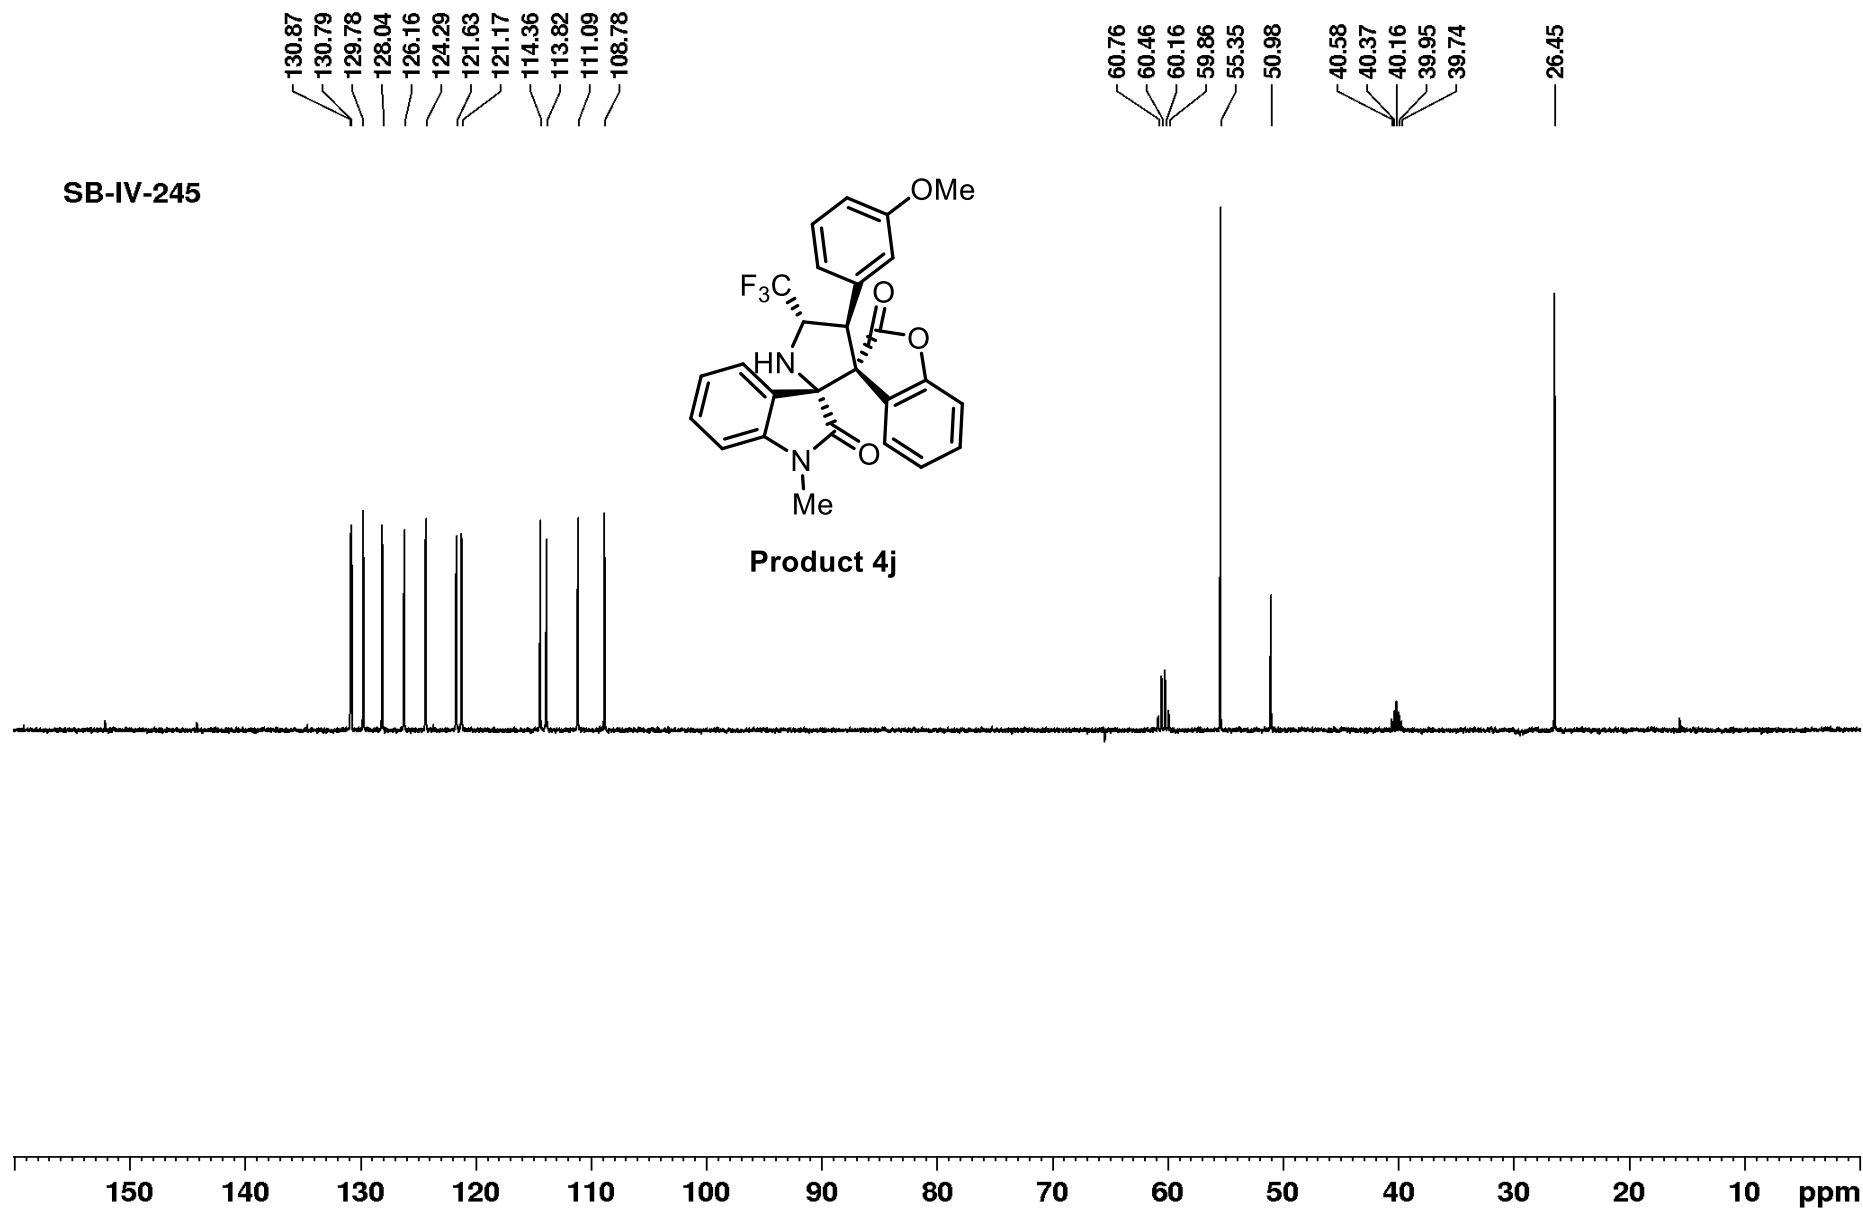

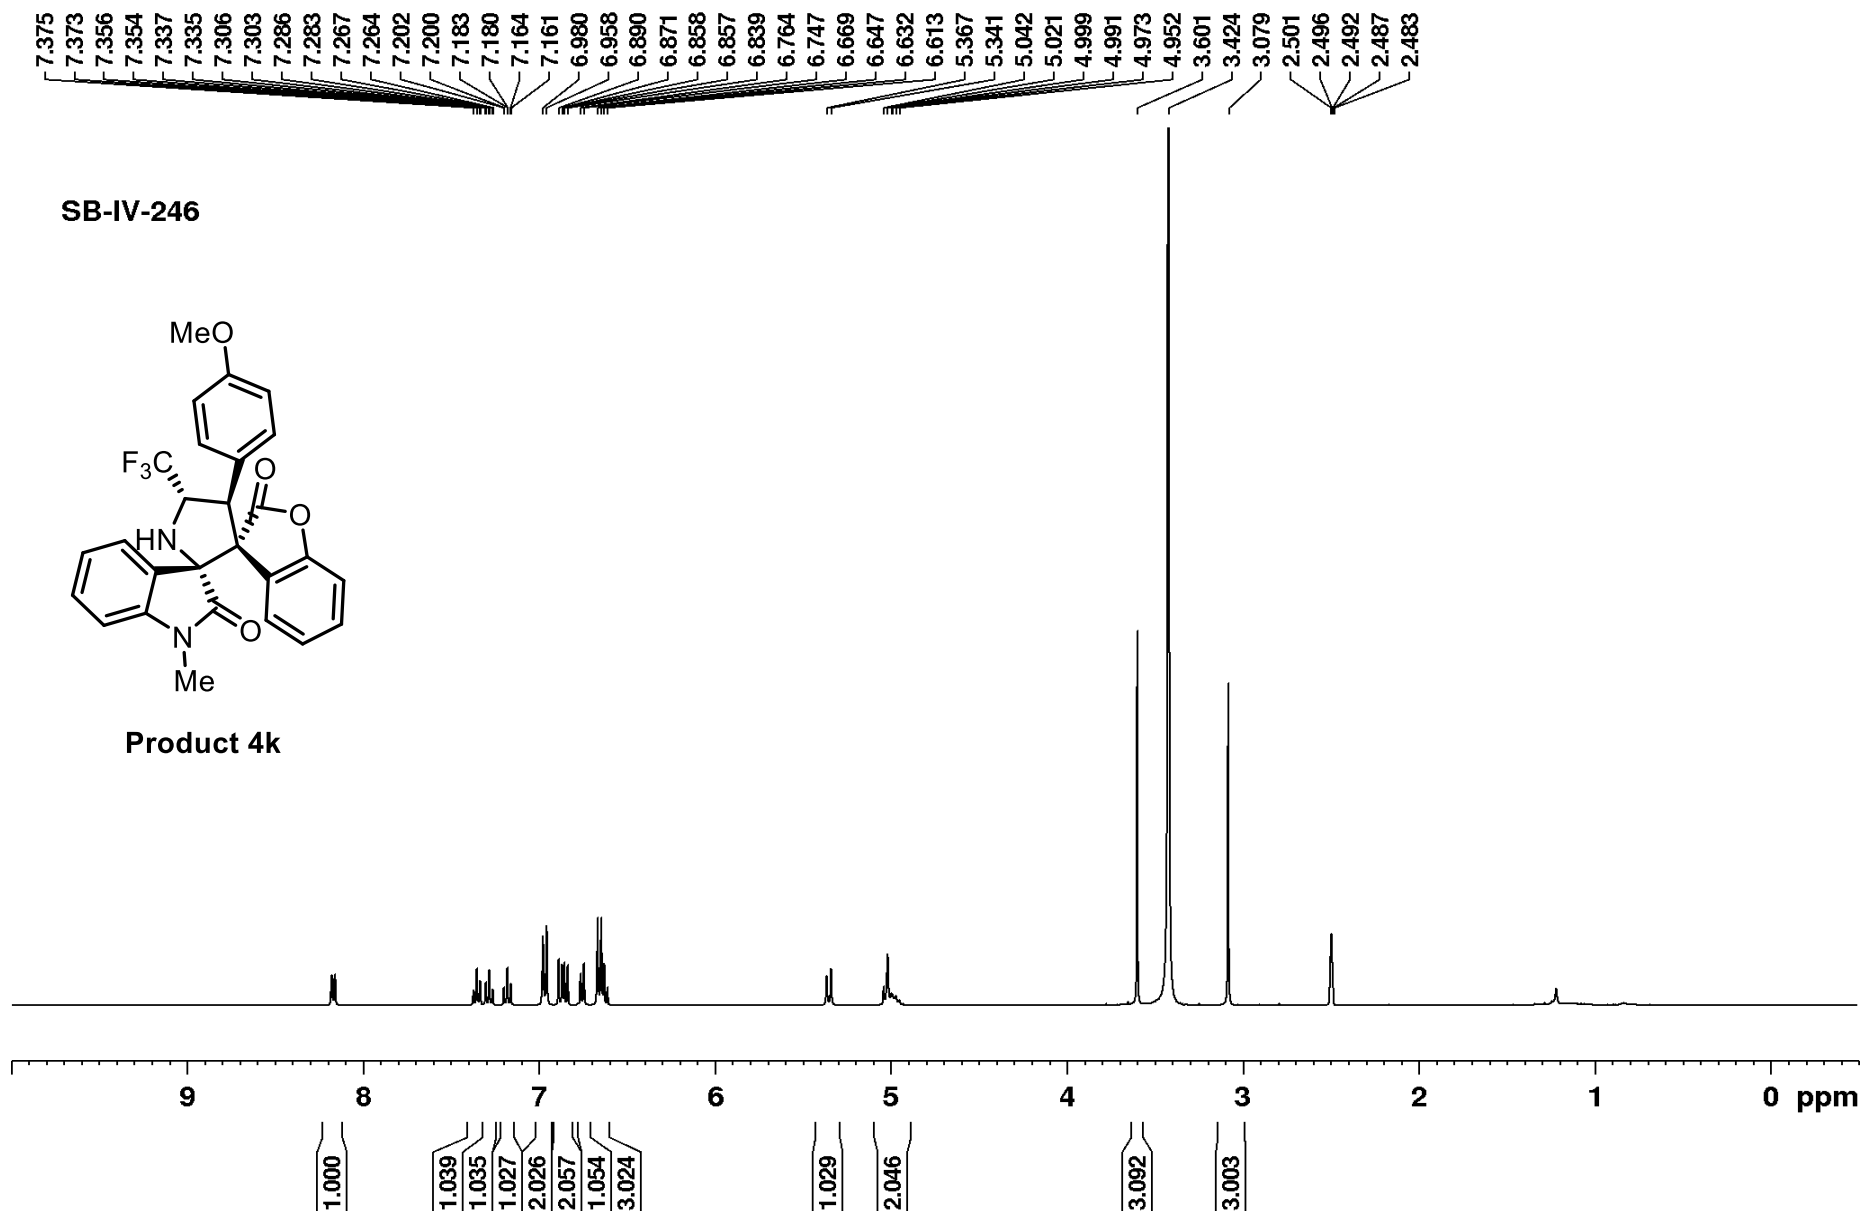



SB-IV-246

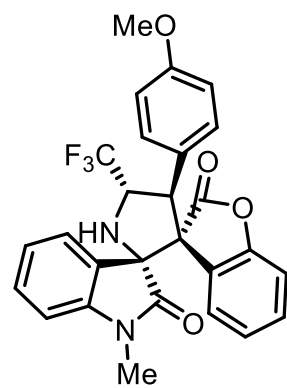

Product 4k

— -70.38

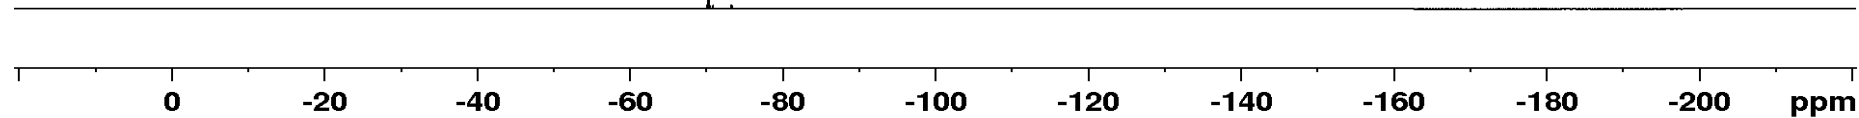

S69

SB-IV-246

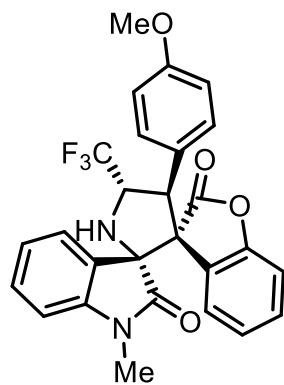

Product 4k

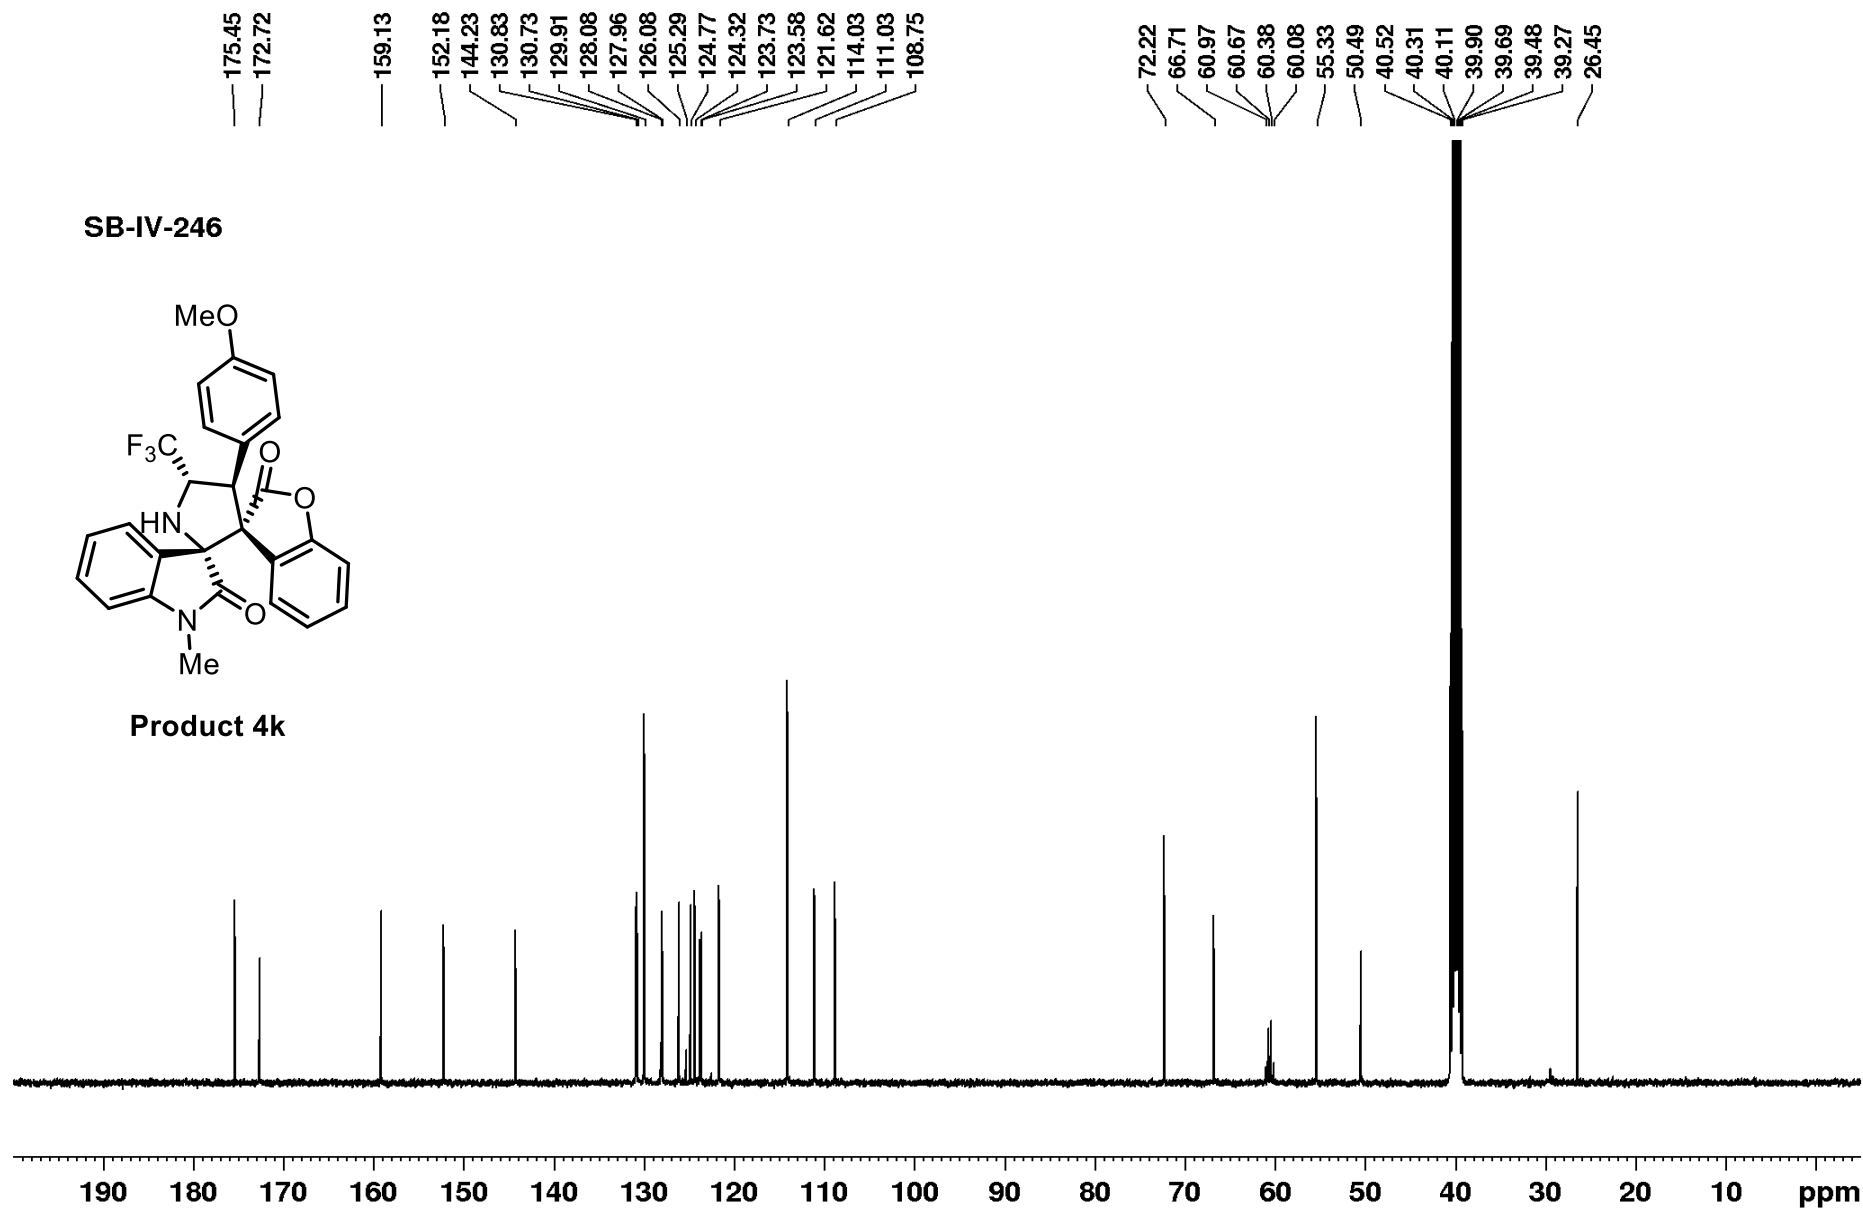

SB-IV-246

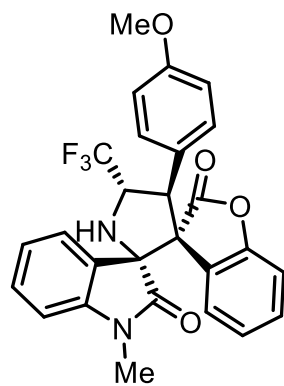

Product 4k

130.84  
130.73  
129.92  
127.96  
126.09  
124.32  
121.62  
114.03  
111.04  
108.76

60.96  
60.66  
60.36  
60.06  
55.33  
50.49  
40.55  
40.35  
40.14  
39.93  
39.72  
26.45

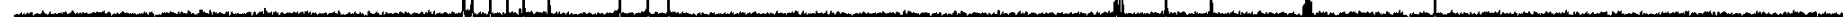

170 160 150 140 130 120 110 100 90 80 70 60 50 40 30 20 10 0 ppm

SB-IV-243

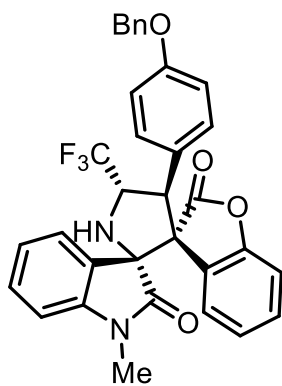

Product 4I

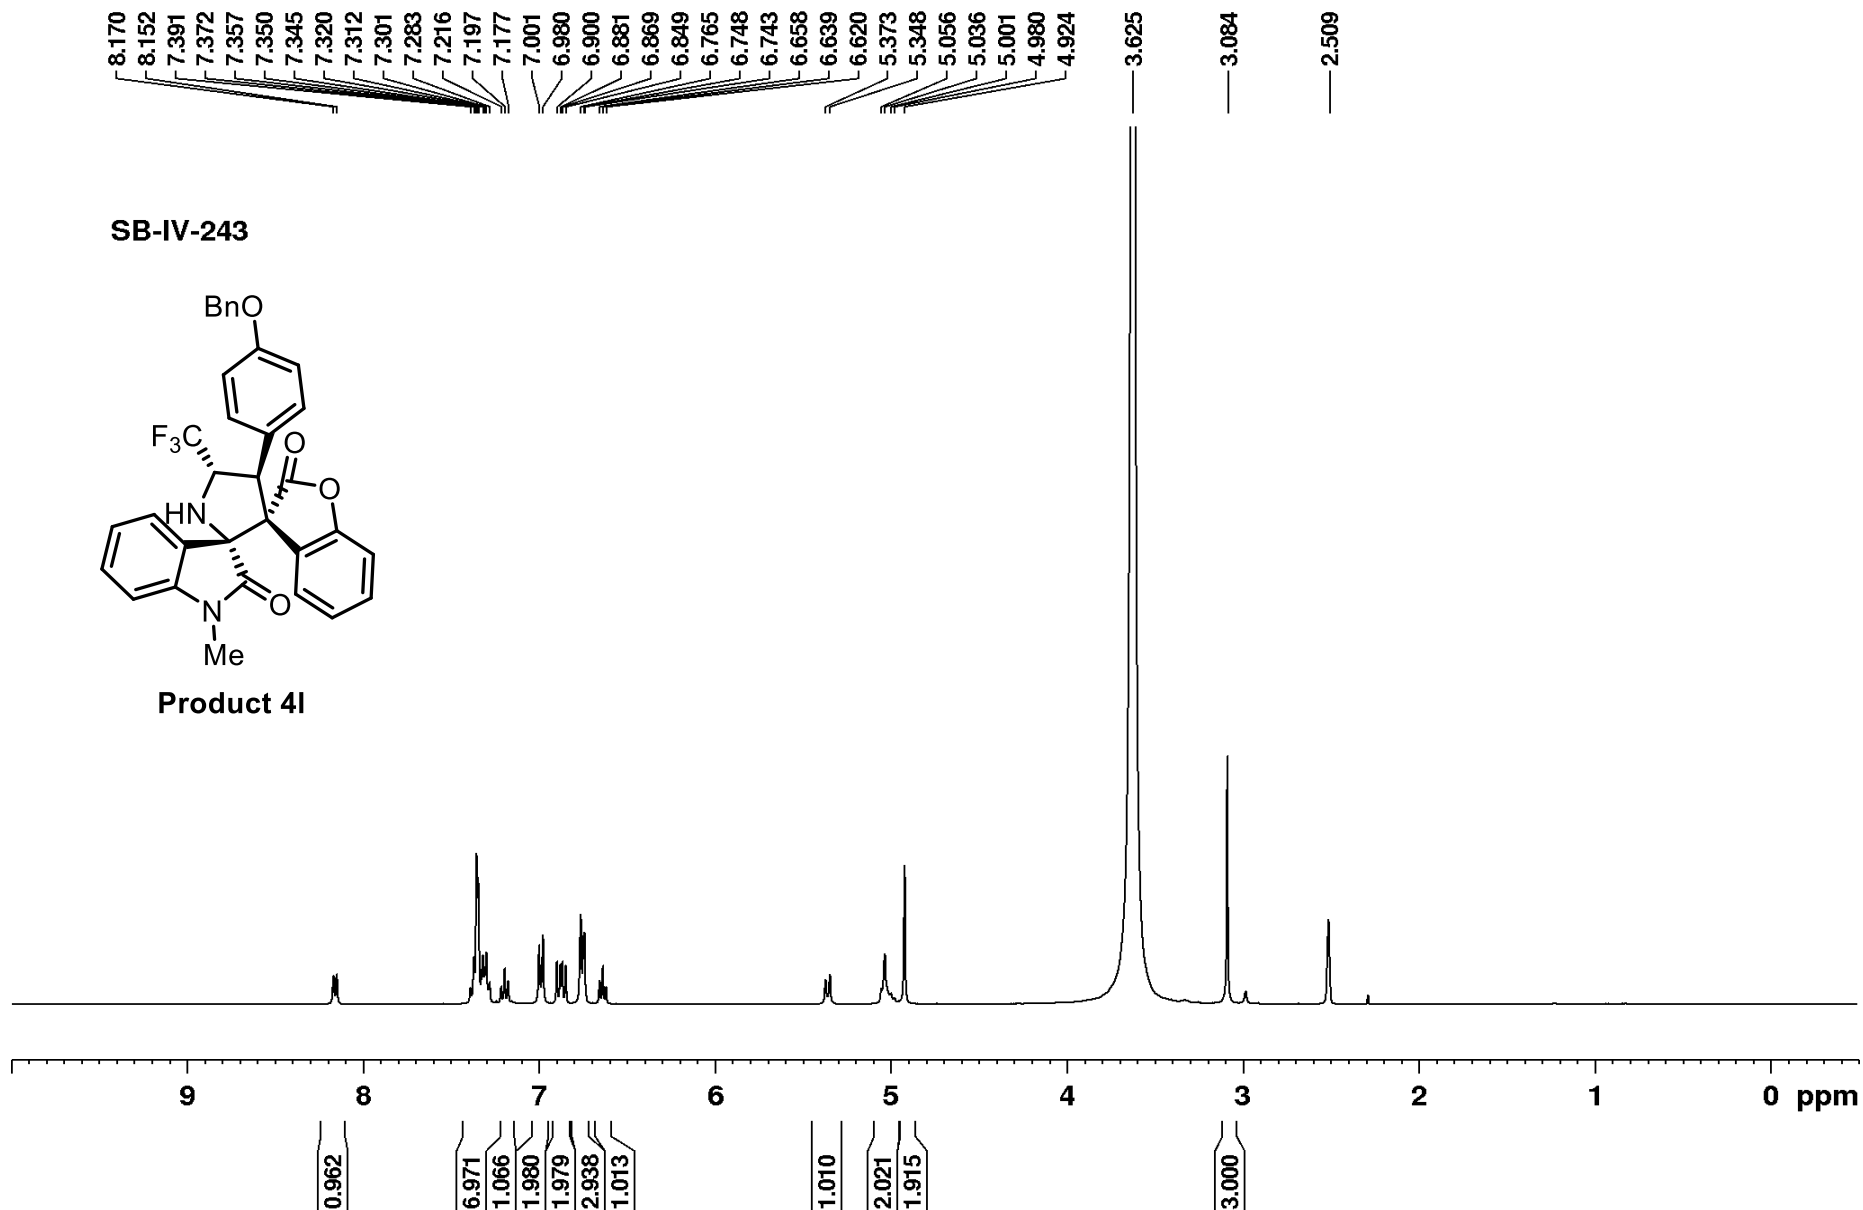

SB-IV-243

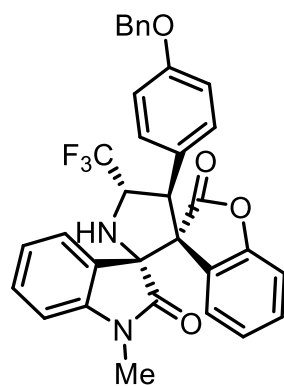

Product 4I

— -70.41

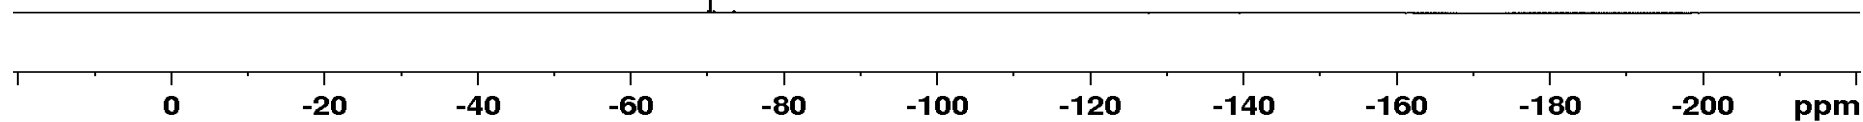

S73

SB-IV-243

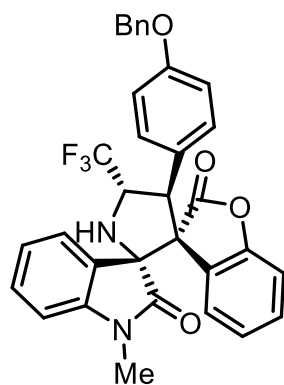

Product 4I

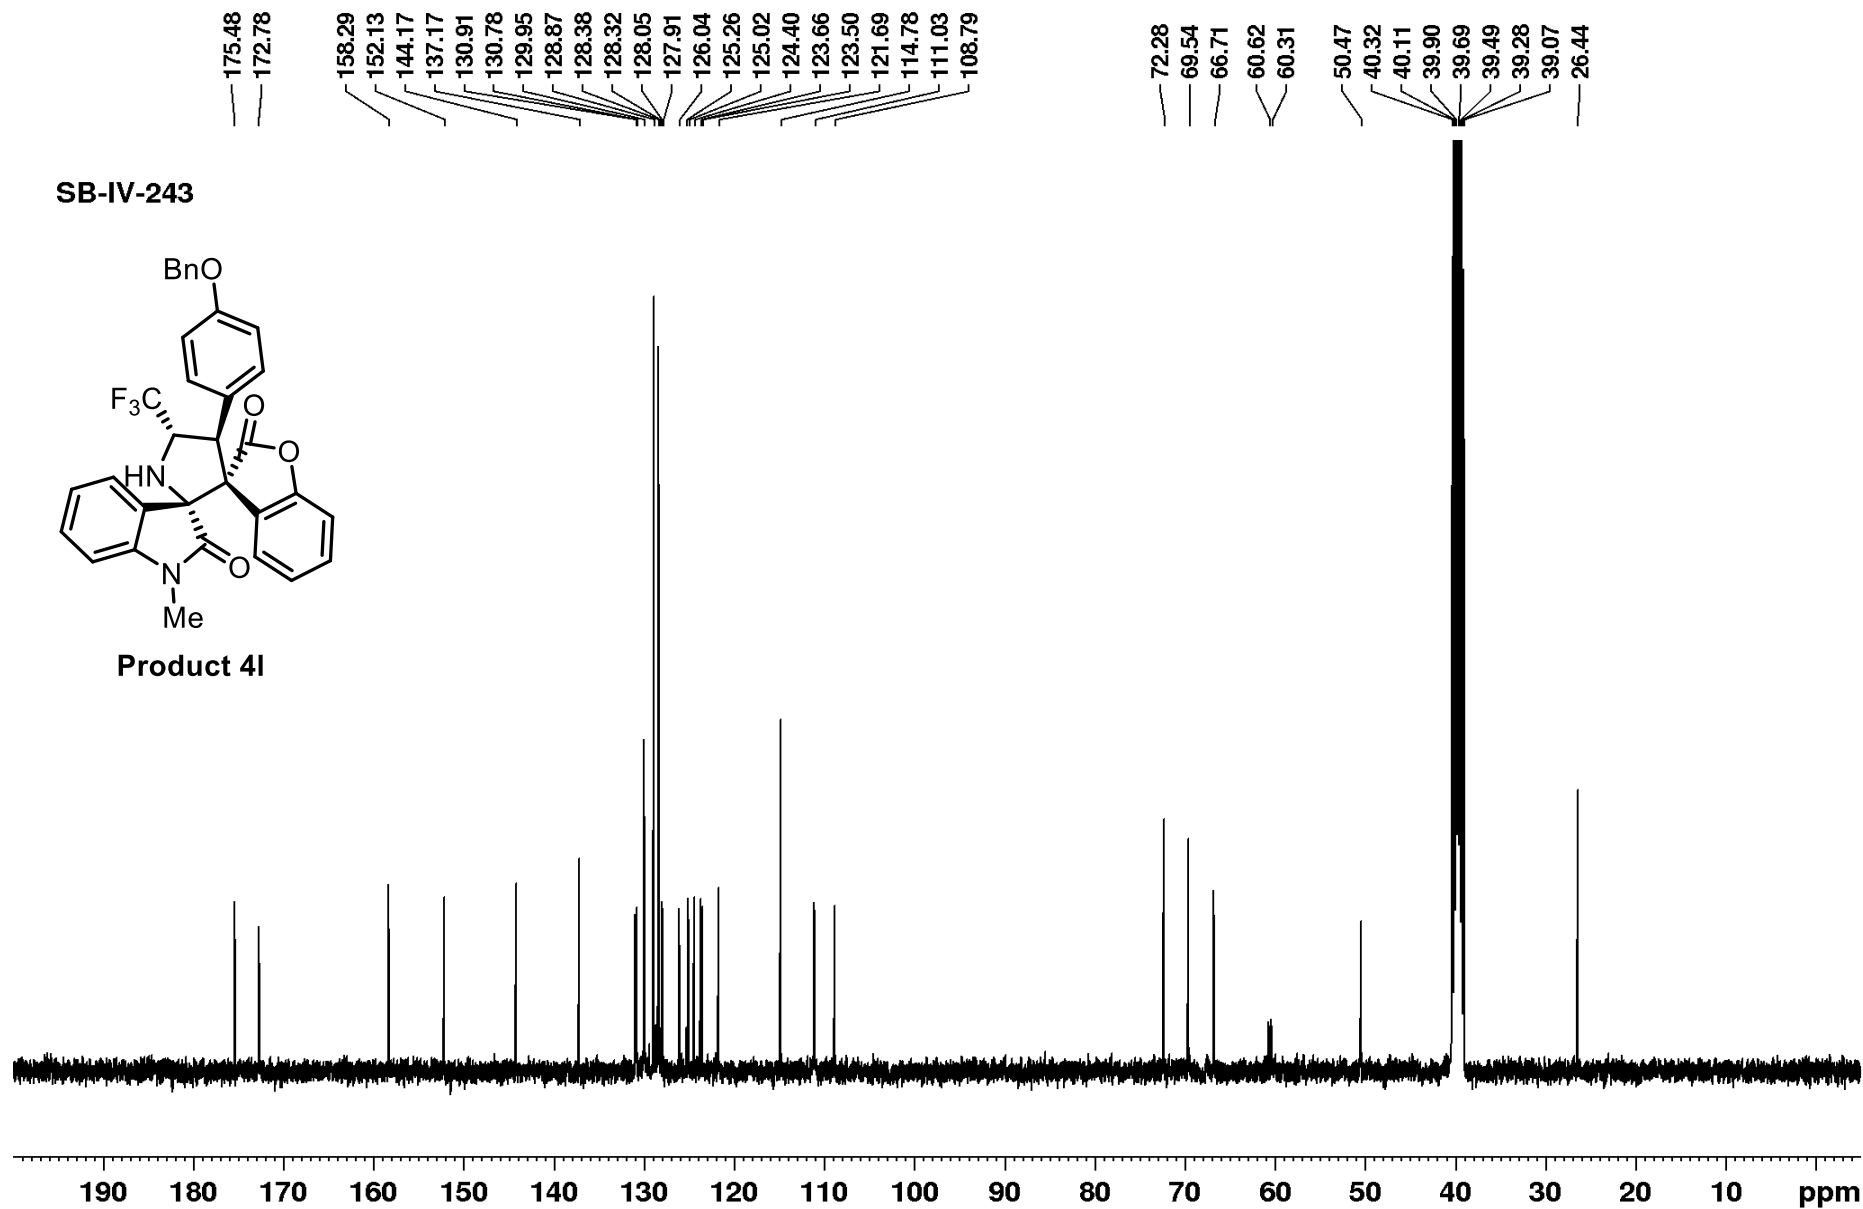

SB-IV-243

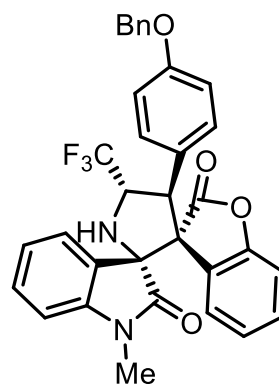

Product 4I

130.91  
130.78  
129.95  
128.87  
128.39  
128.32  
127.91  
126.04  
124.40  
121.69  
114.78  
111.03  
108.79

69.54

60.61  
60.32

50.47

40.16  
39.94  
39.75

26.44

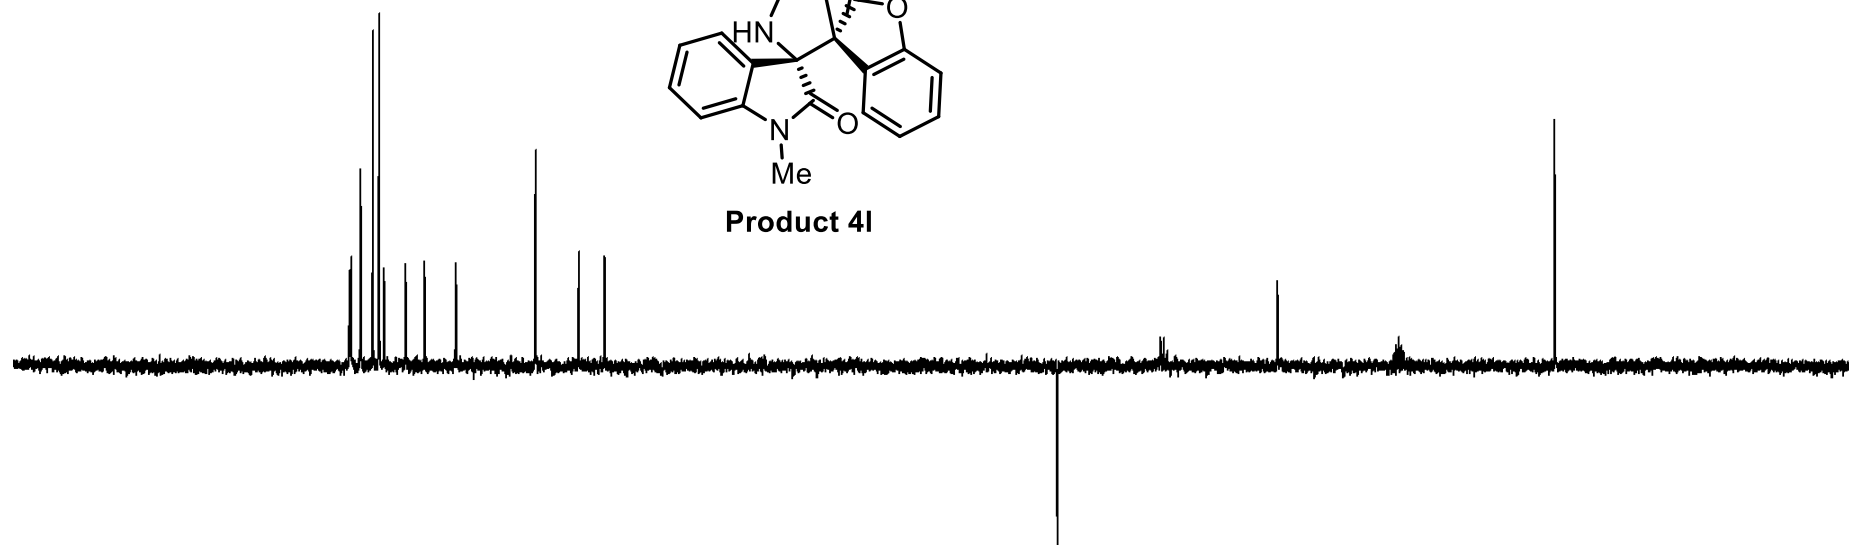

150 140 130 120 110 100 90 80 70 60 50 40 30 20 10 ppm

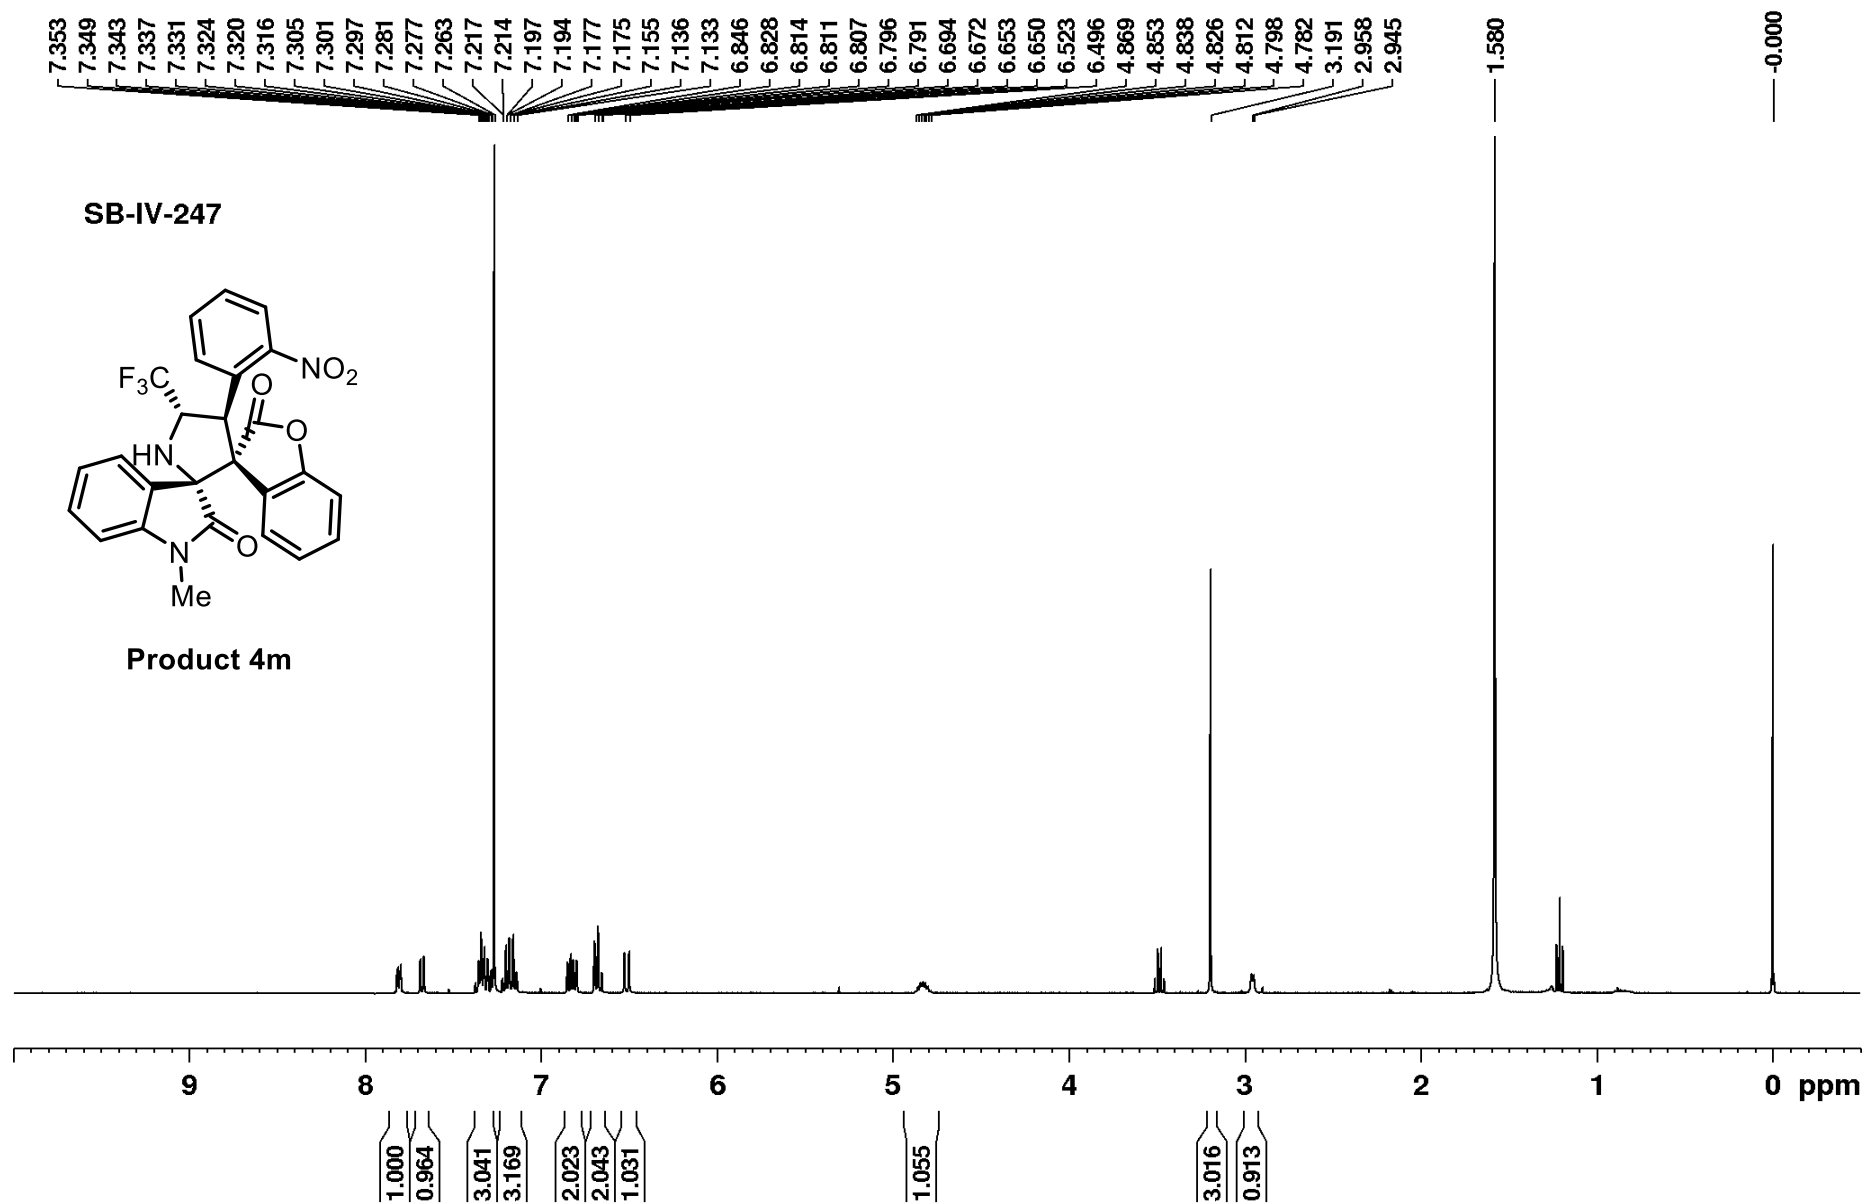



**SB-IV-247**

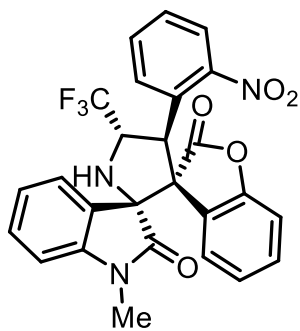

**Product 4m**

—71.65

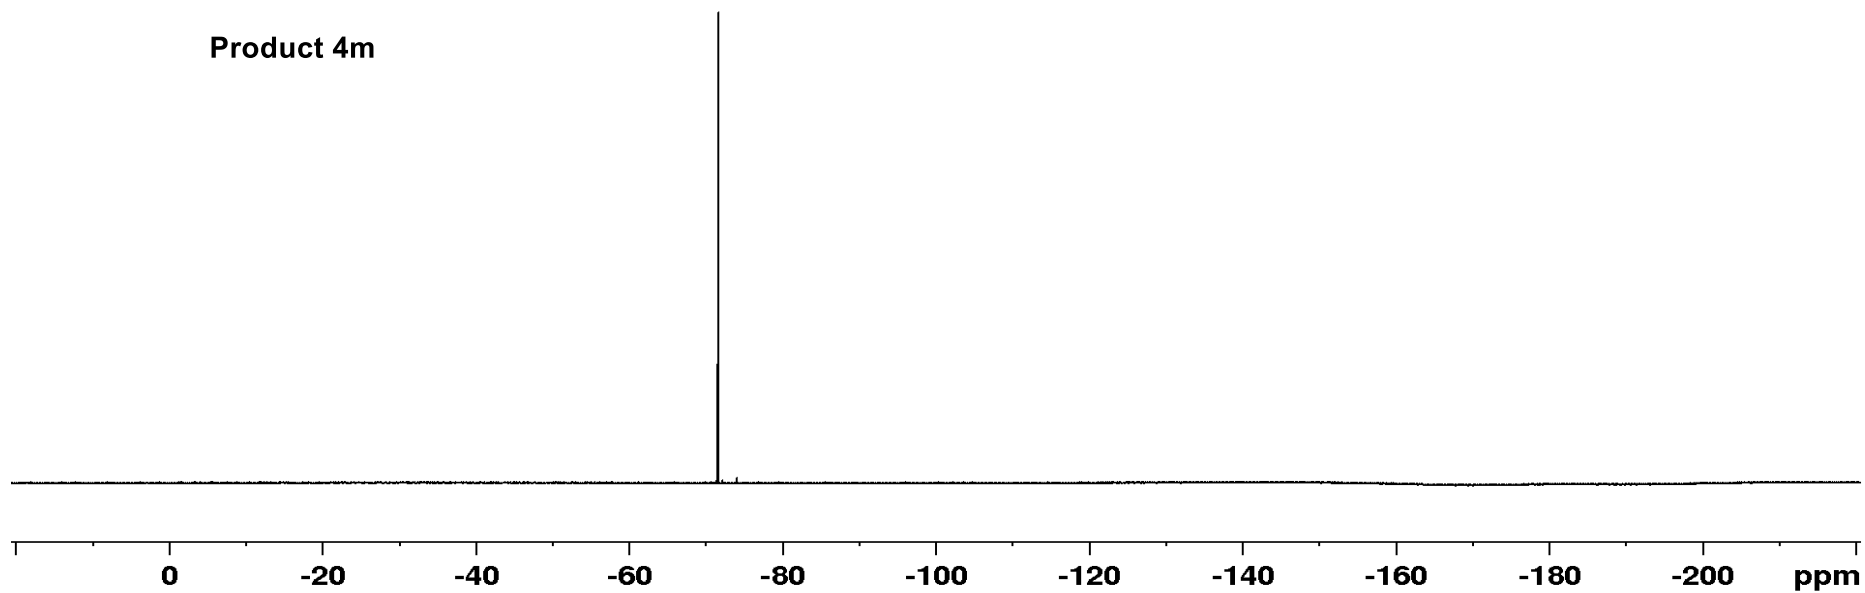

SB-IV-267

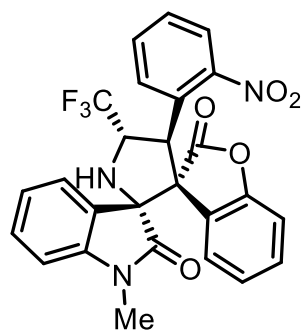

Product 4m

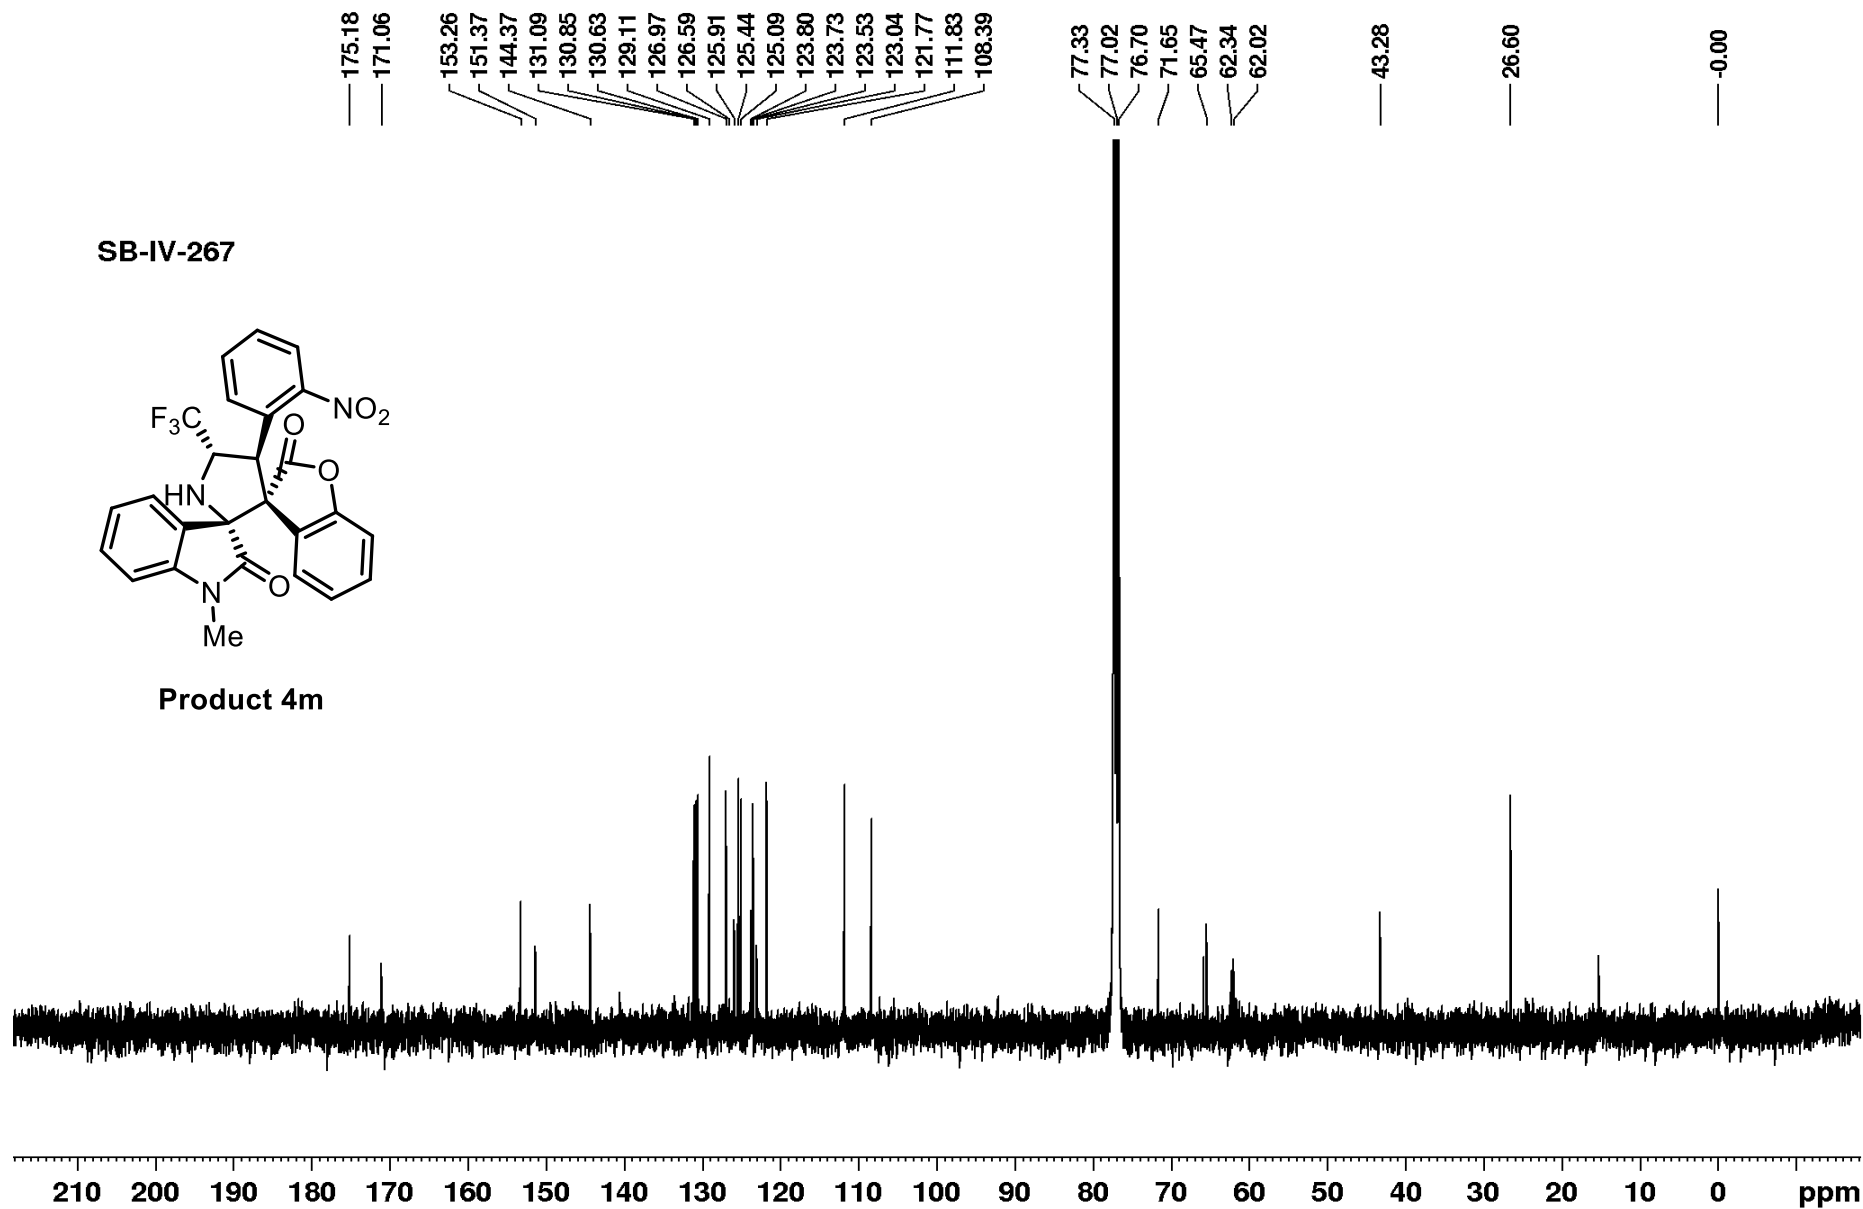

SB-IV-267

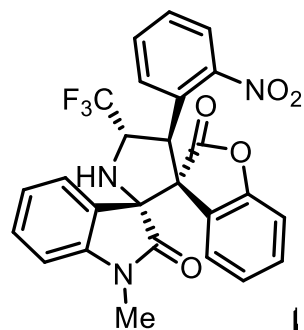

Product 4m

131.09  
130.86  
130.64  
129.10  
126.97  
125.44  
125.09  
123.54  
121.77  
111.84  
108.40

77.22

62.33  
62.02

43.27

26.61

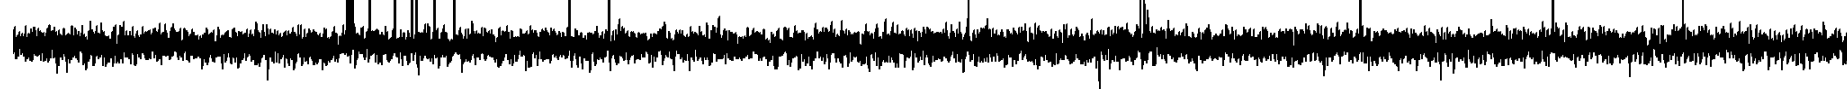

150 140 130 120 110 100 90 80 70 60 50 40 30 20 10 ppm

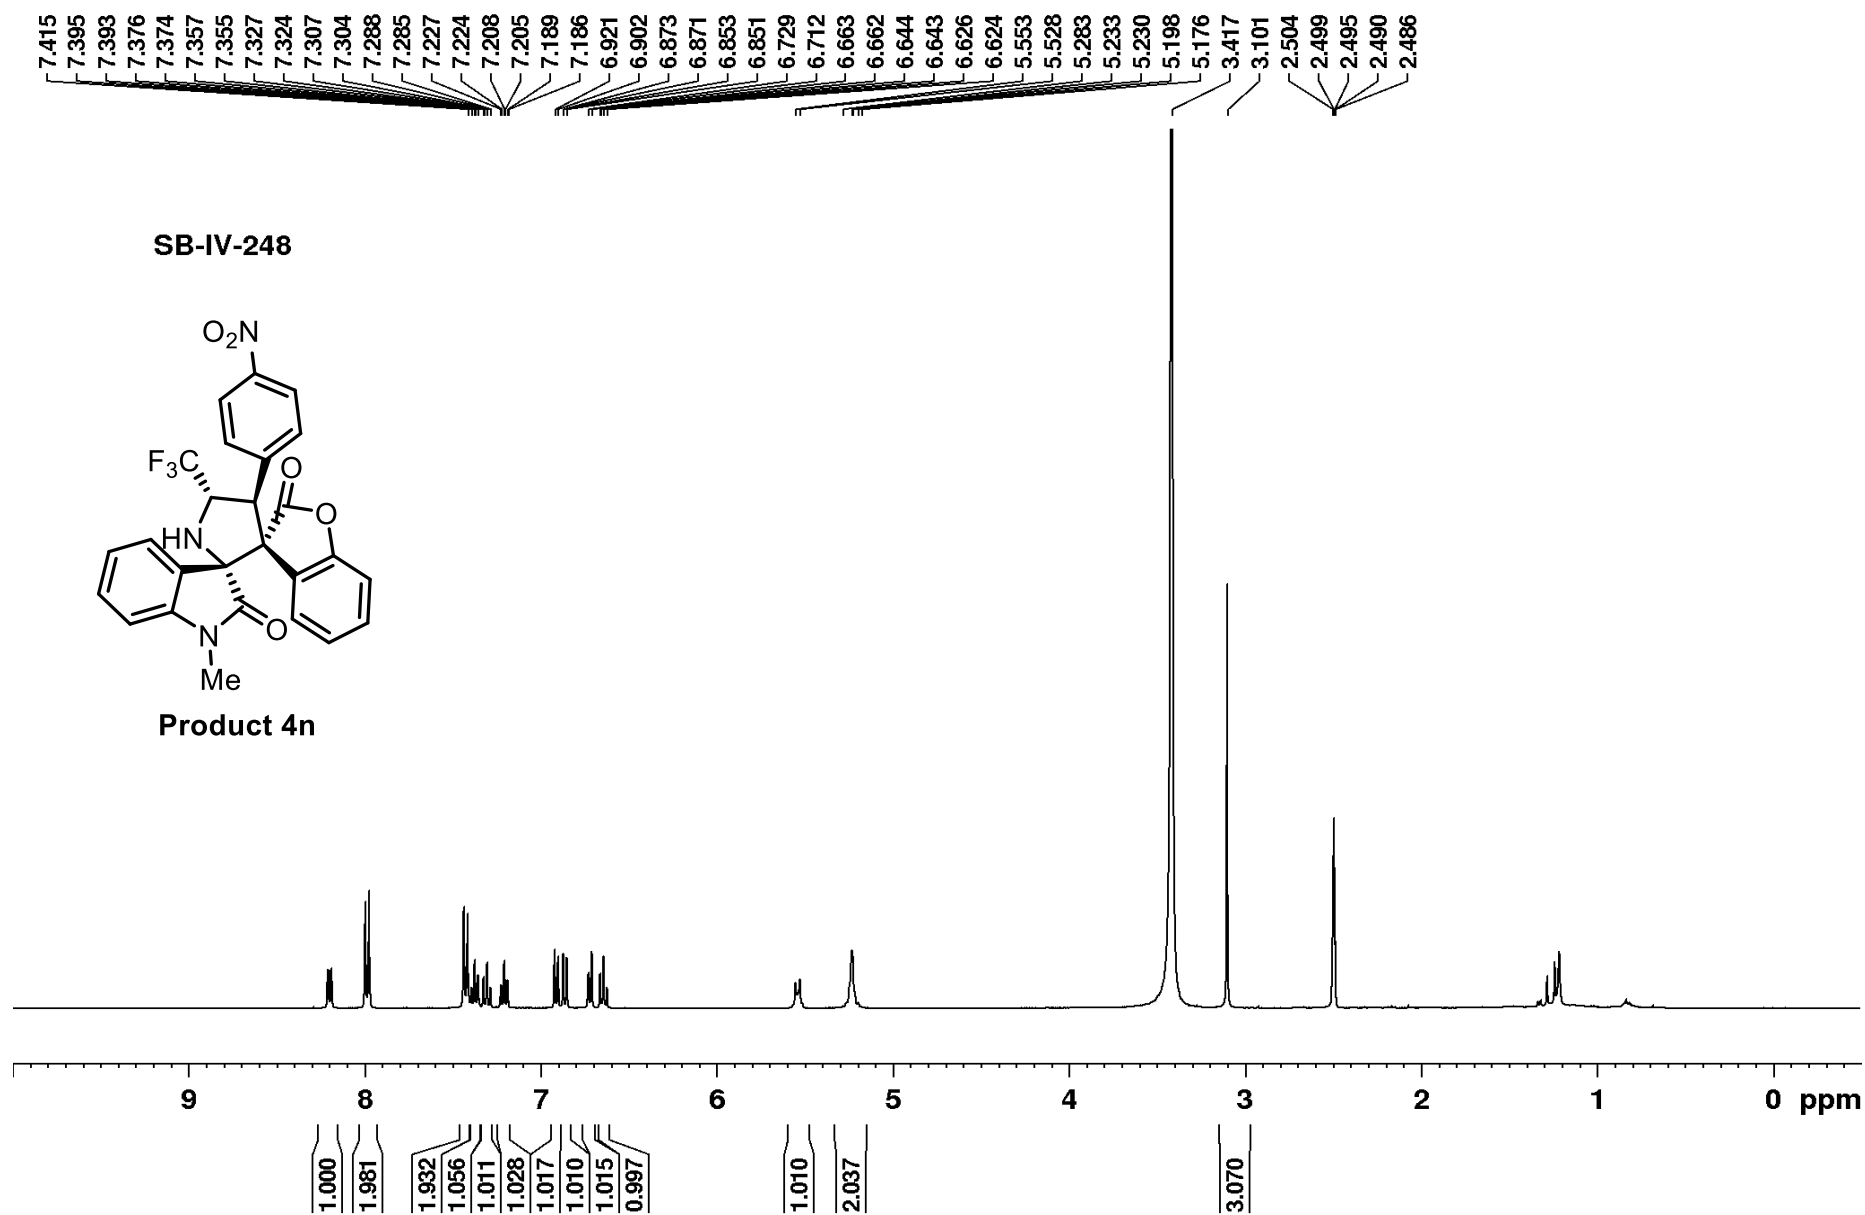

SB-IV-248

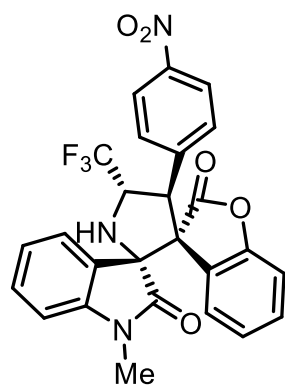

Product 4n

— -70.61

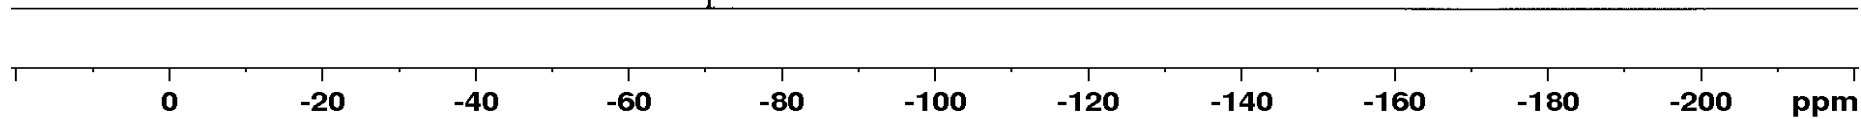

S81

SB-IV-248

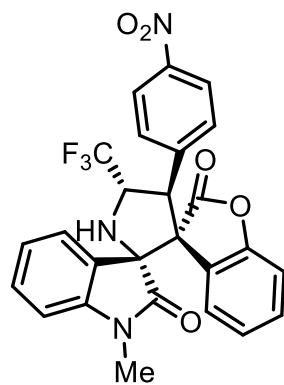

Product 4n

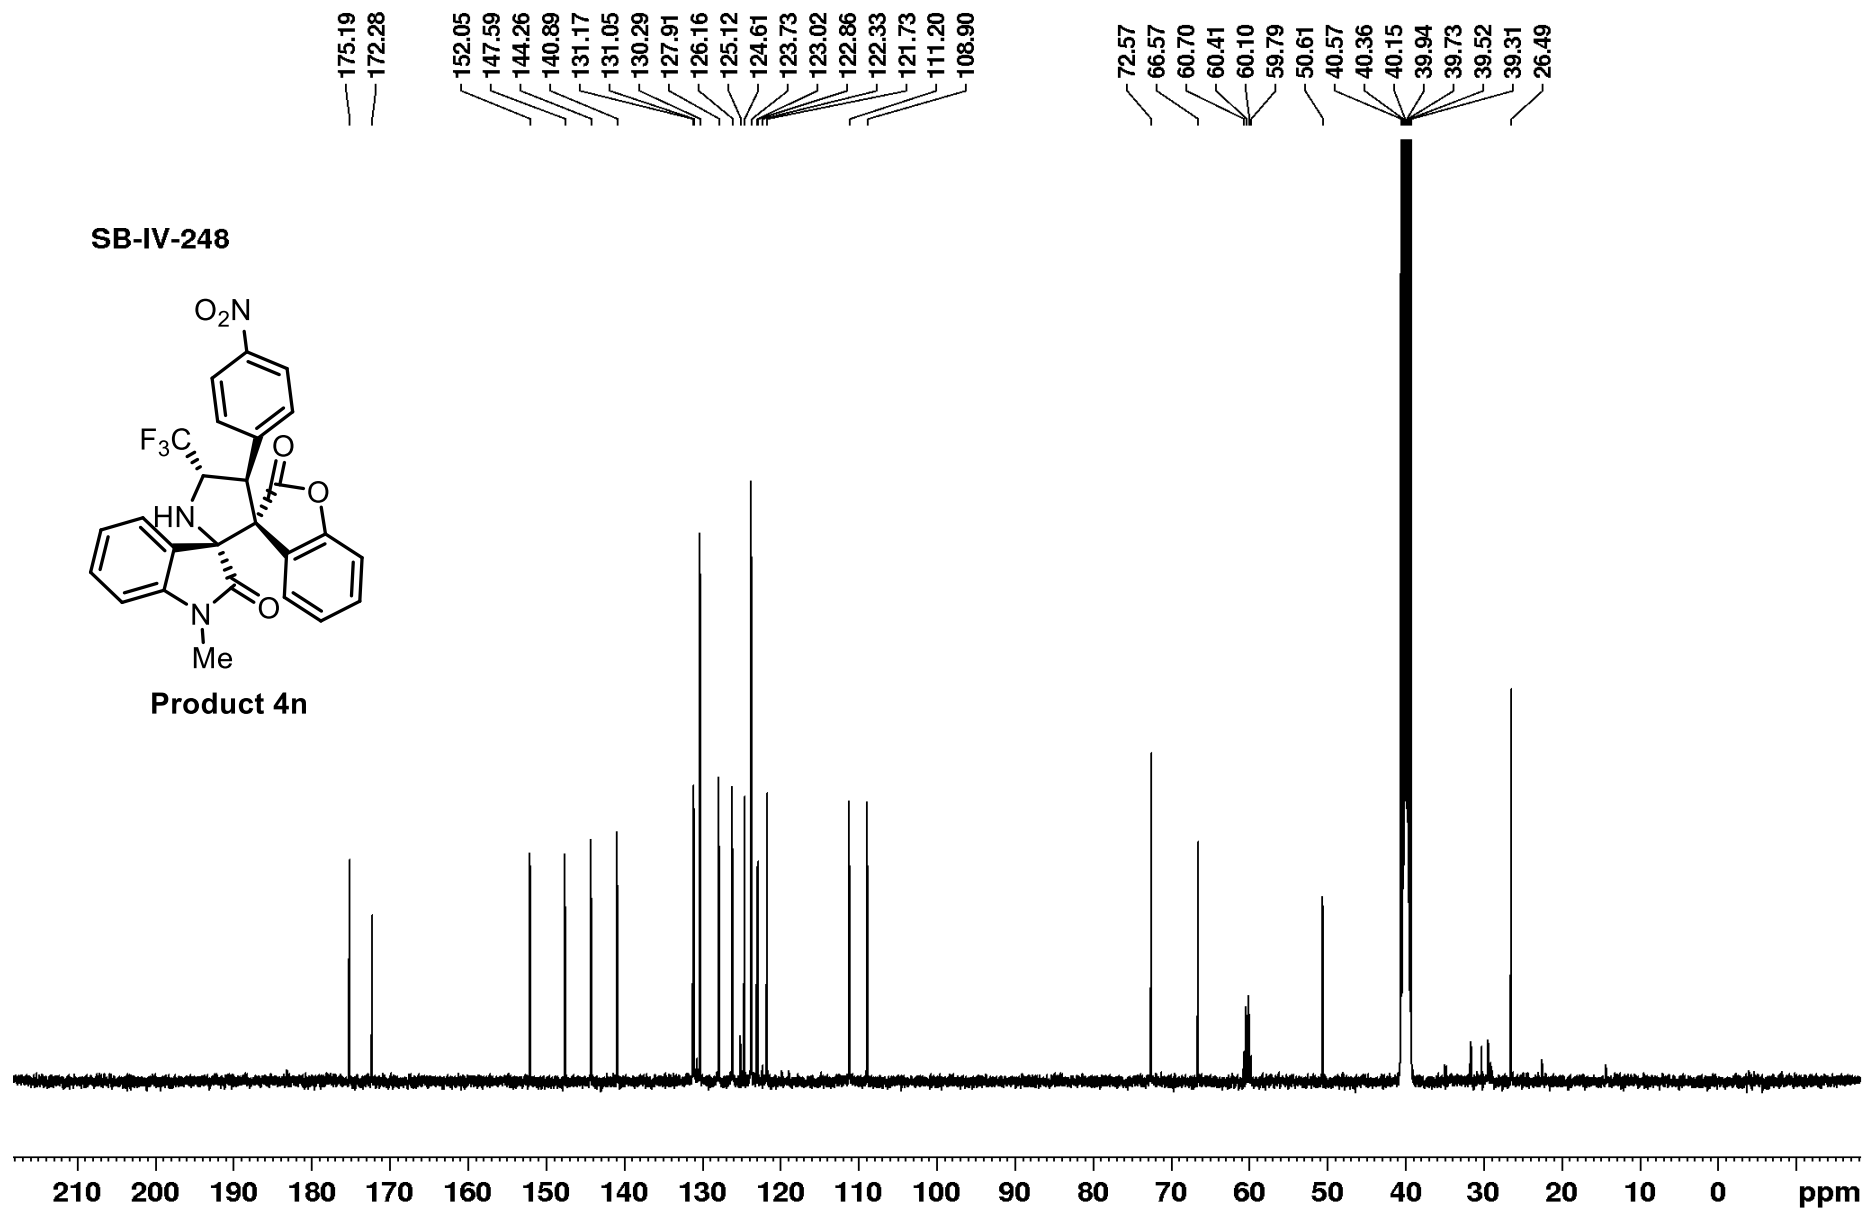

SB-IV-248

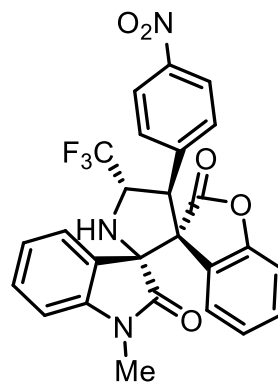

Product 4n

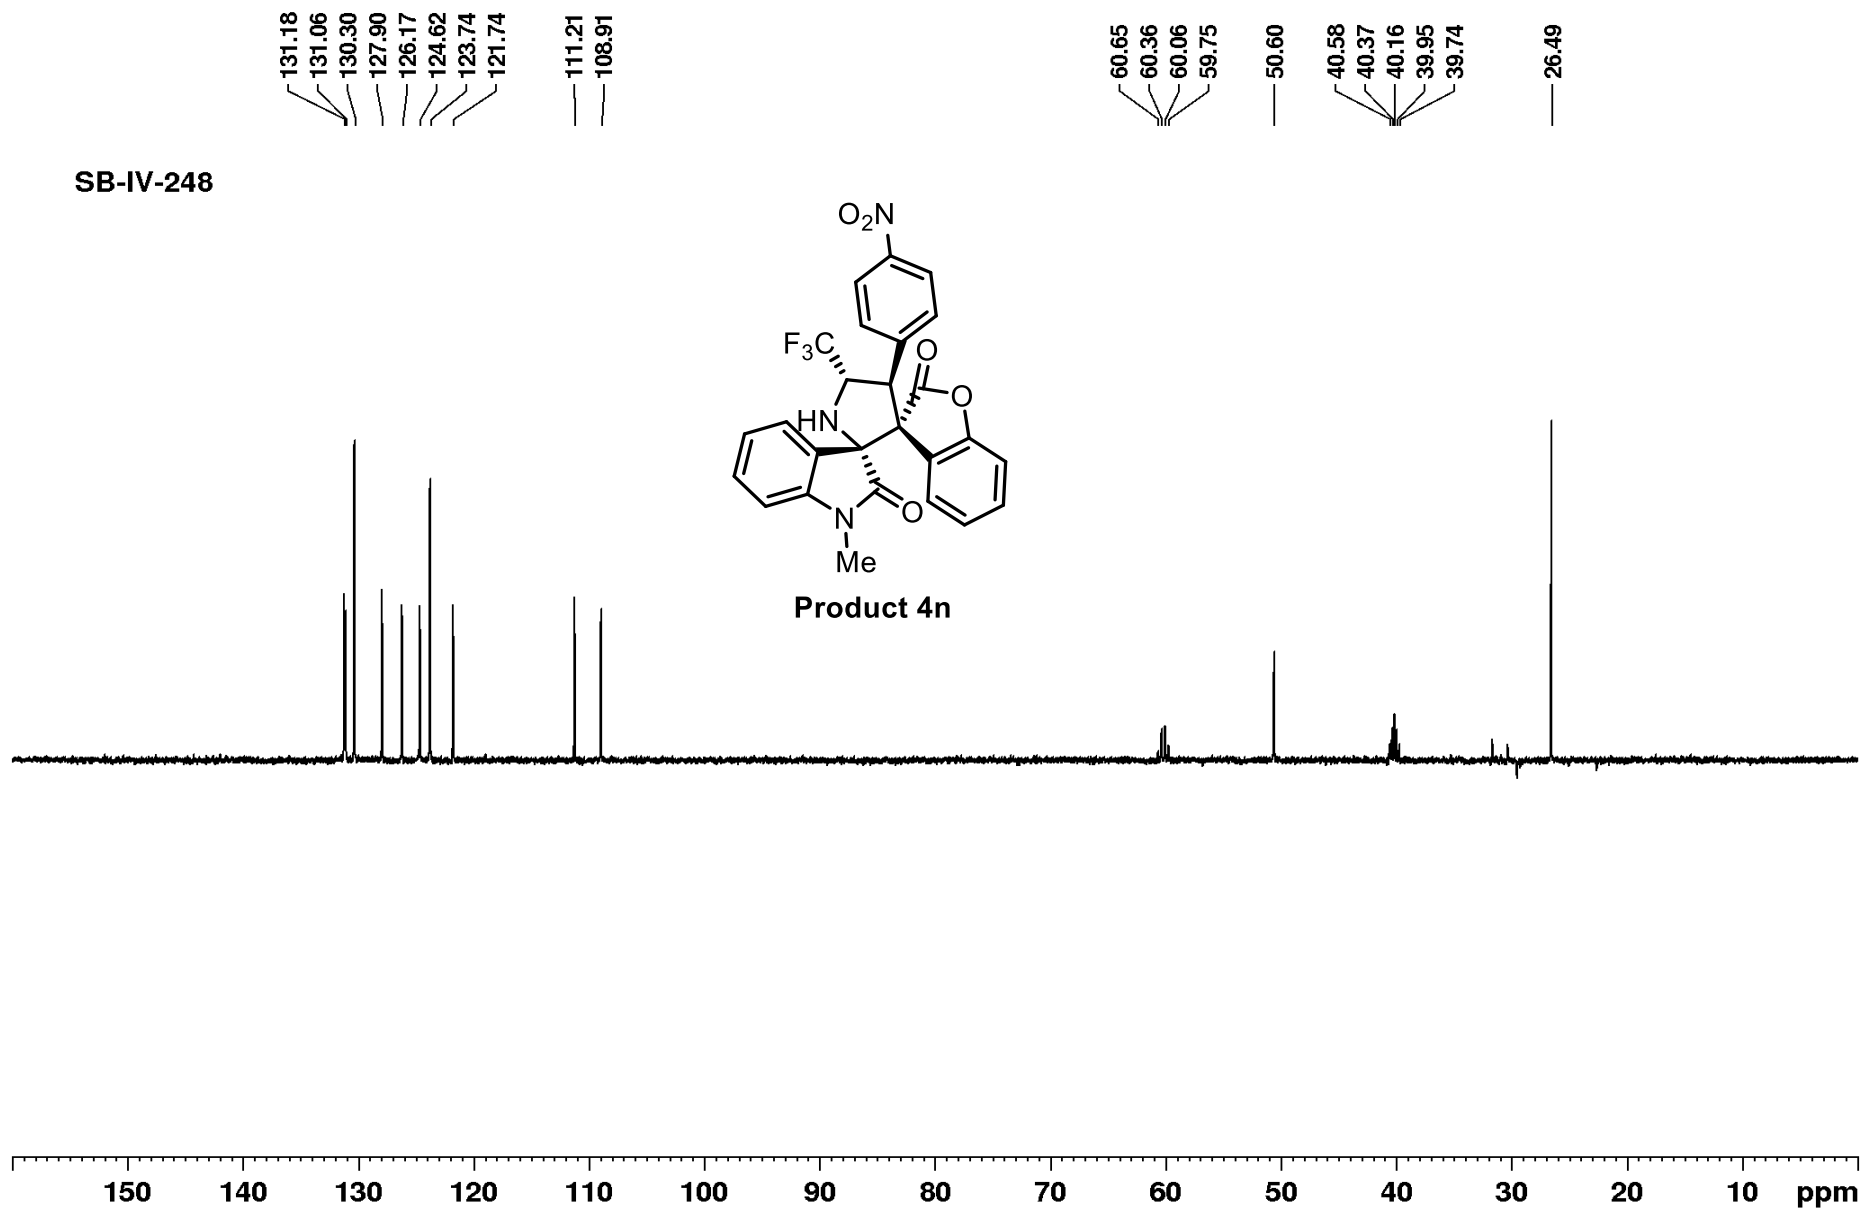

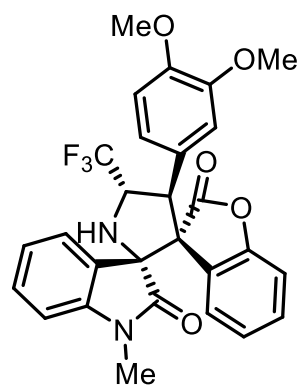

**Product 4o**

**SB-IV-249**

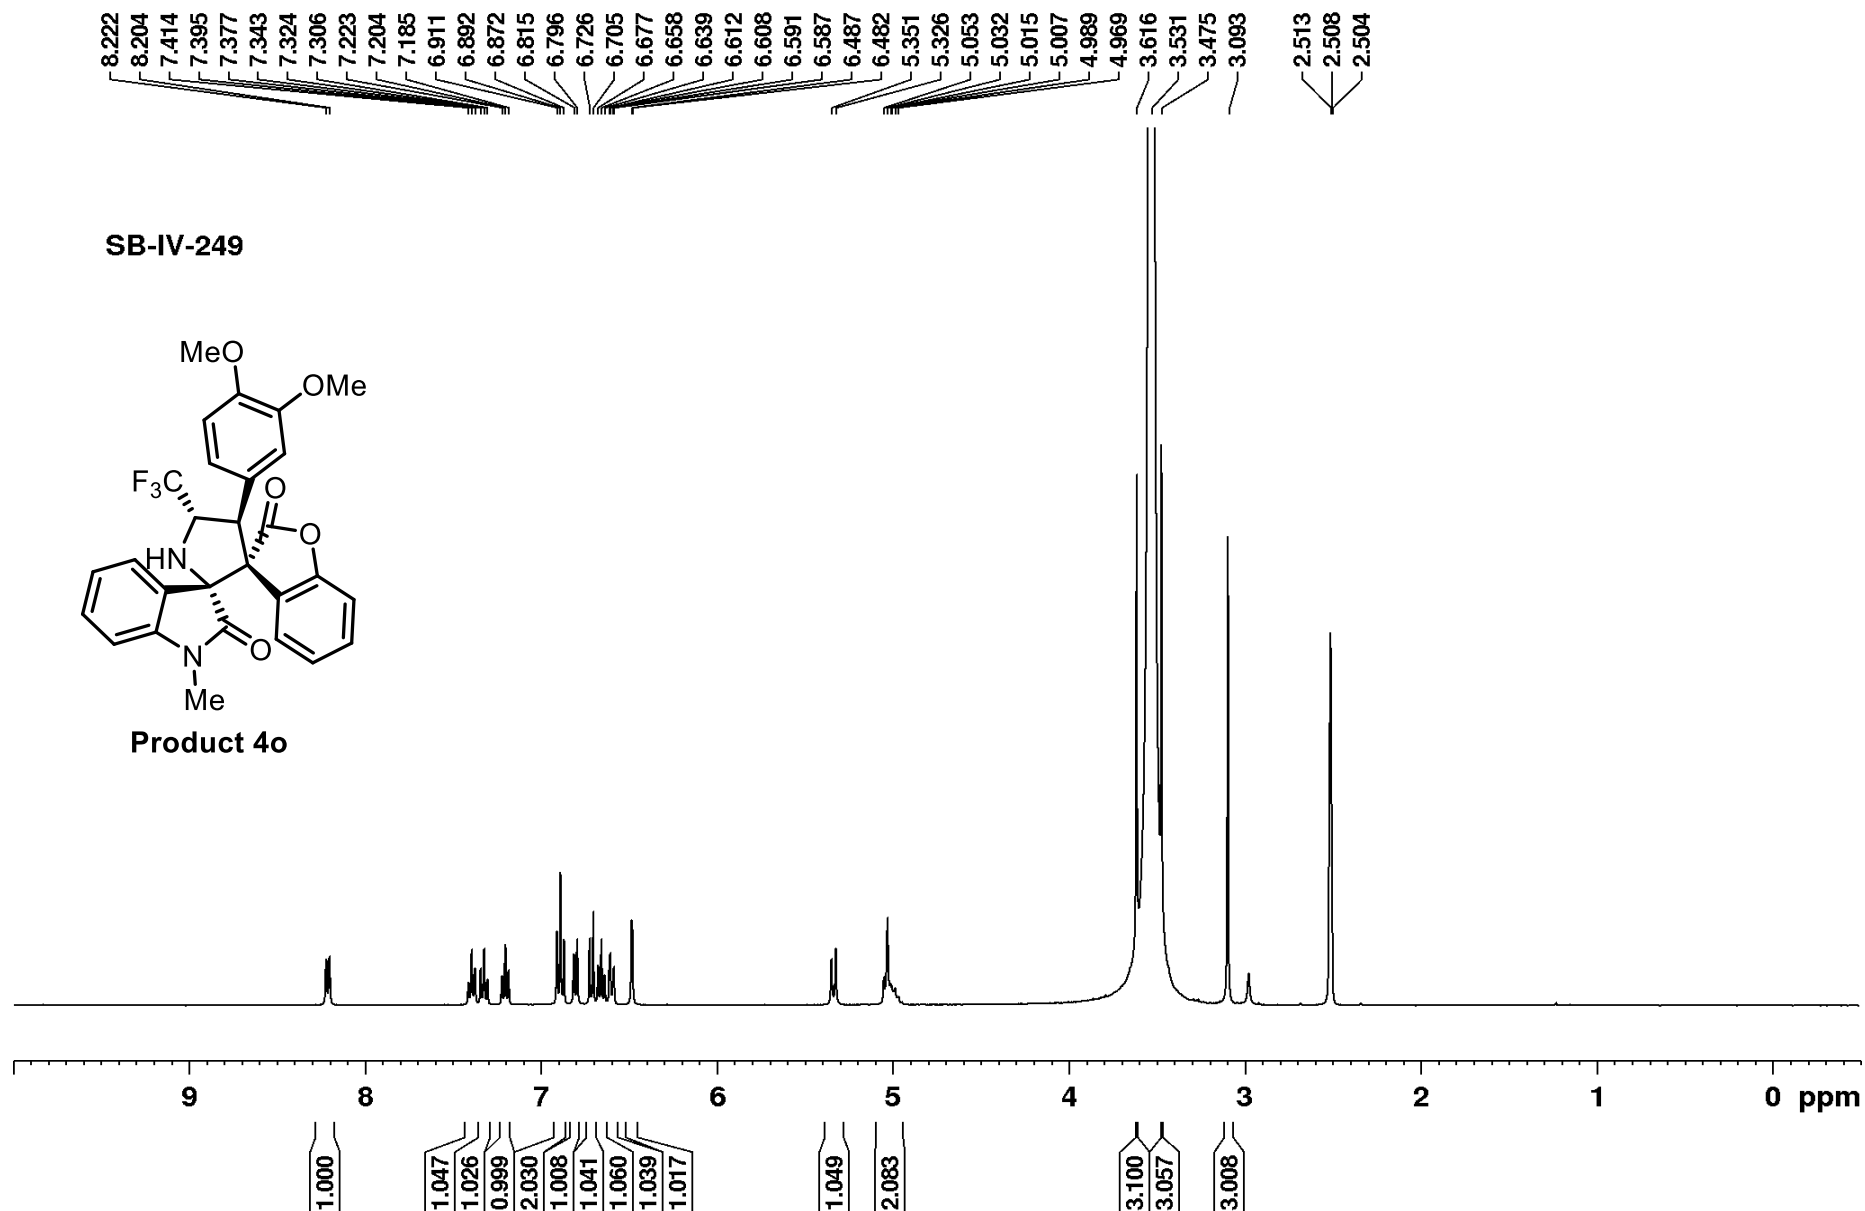



SB-IV-249

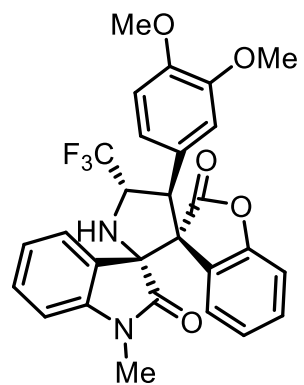

Product 4o

— -70.45

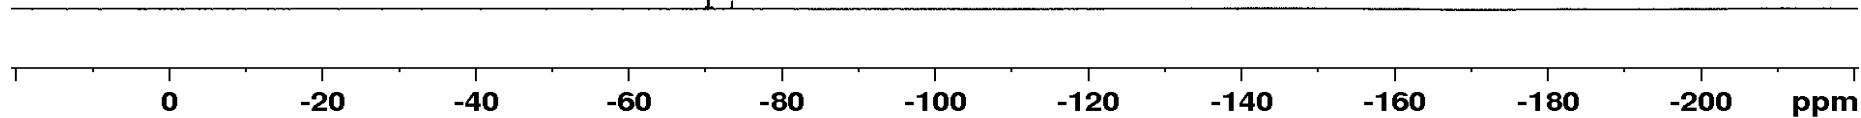

S85

SB-IV-249

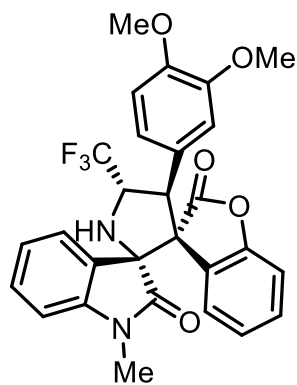

Product 4o

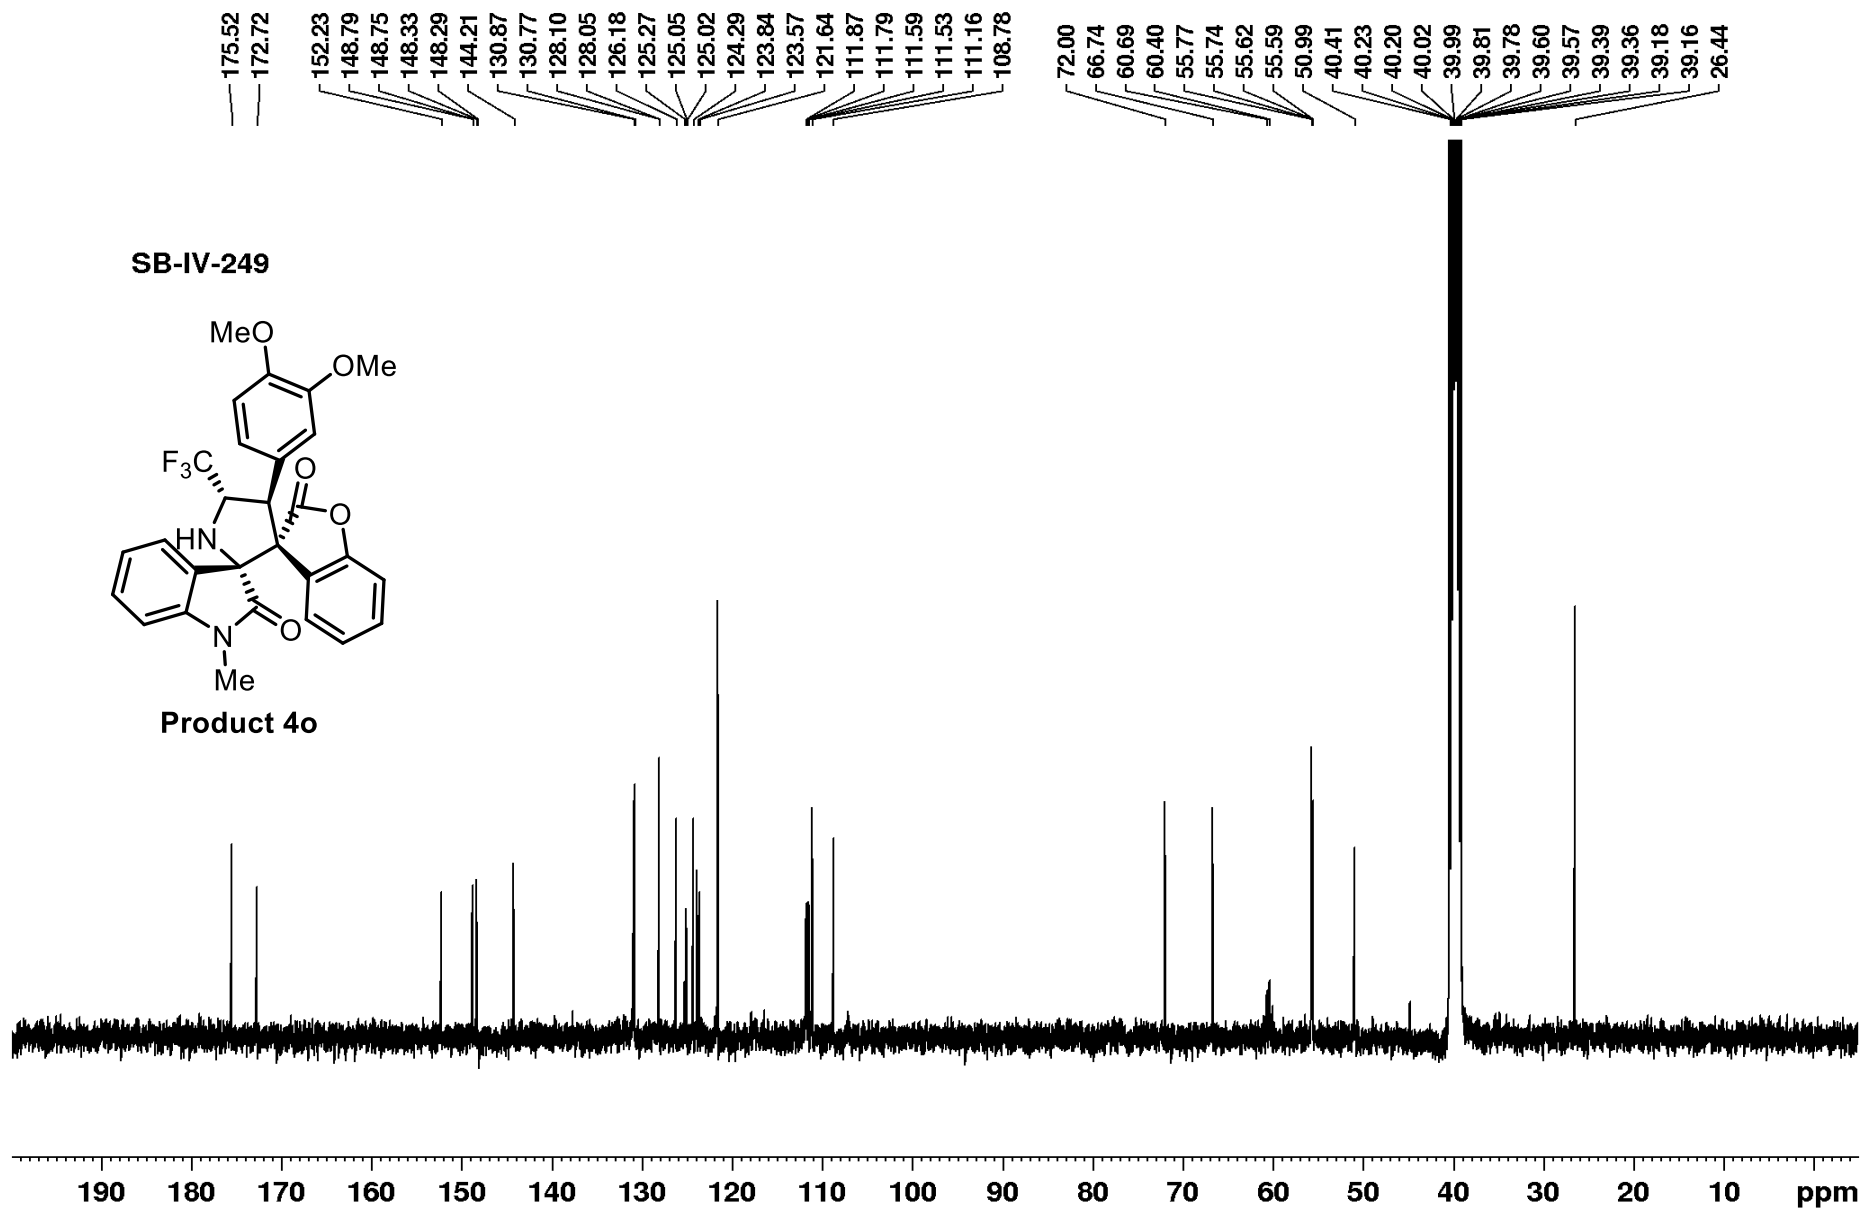

SB-IV-249

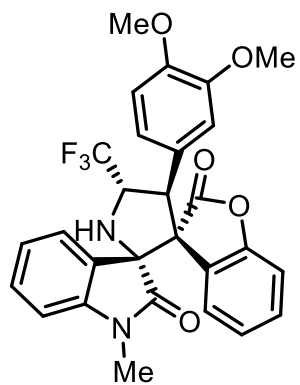

Product 4o

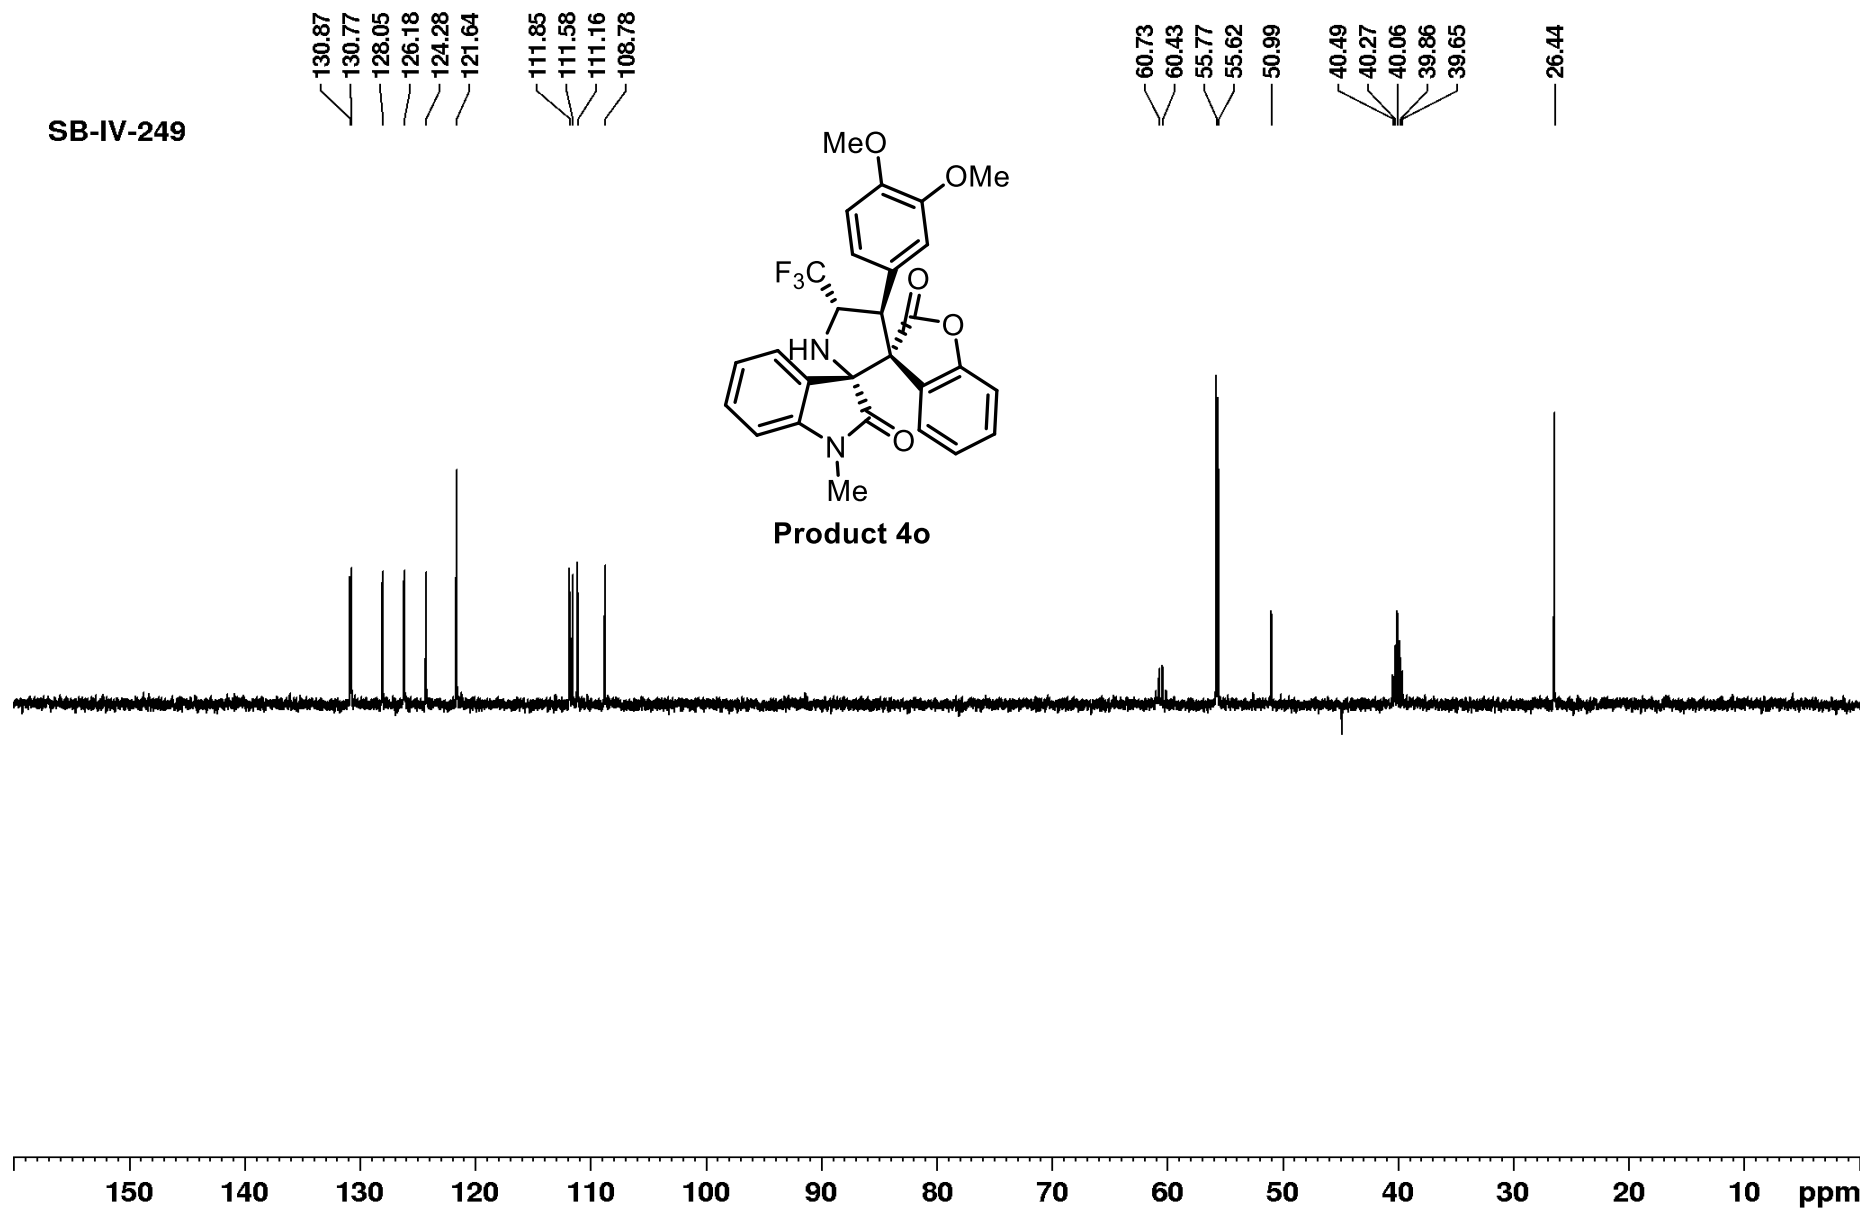

SB-IV-253

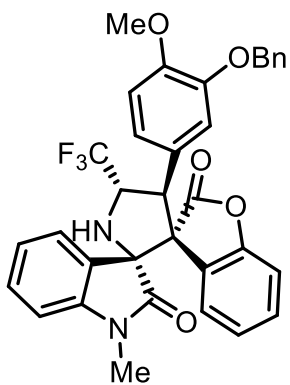

Product 4p

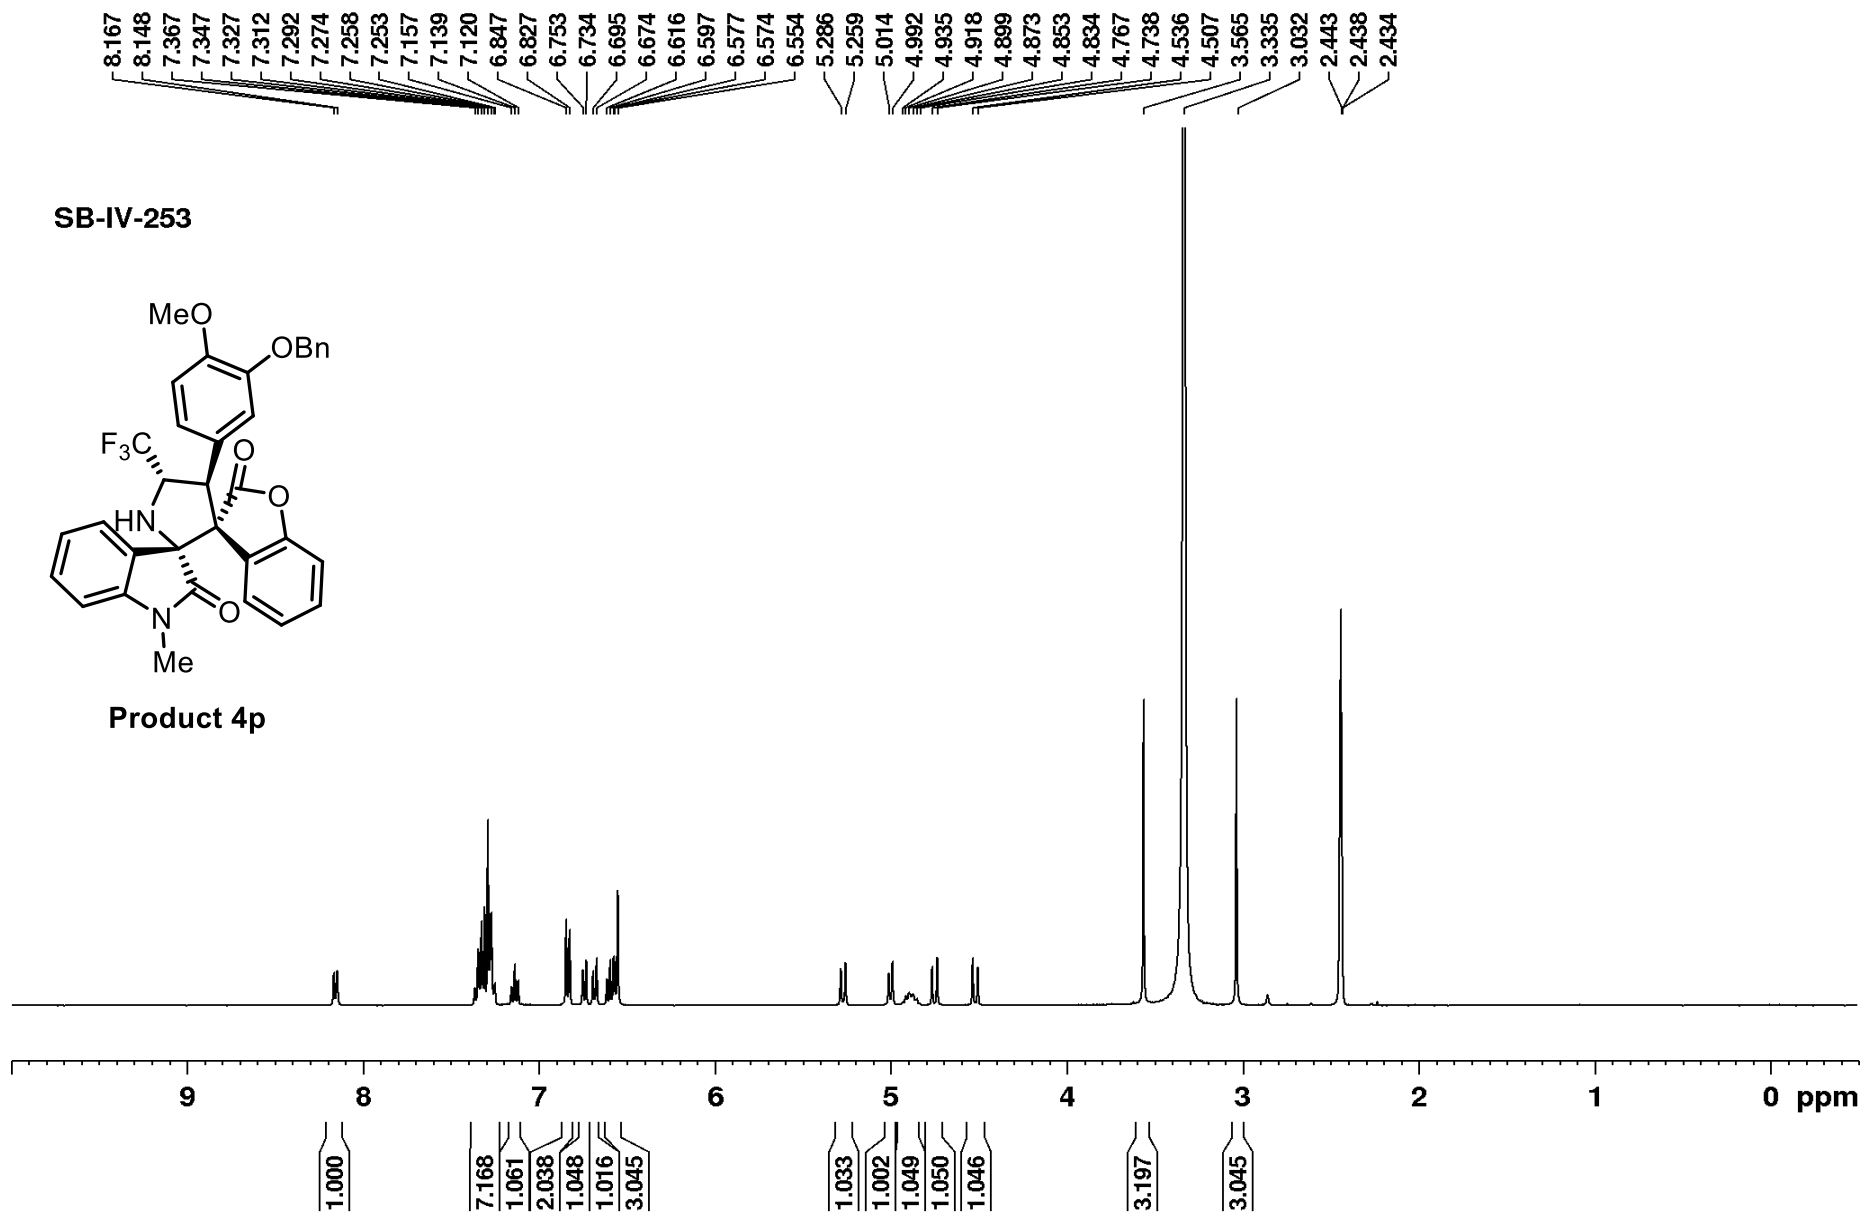

**SB-IV-253**

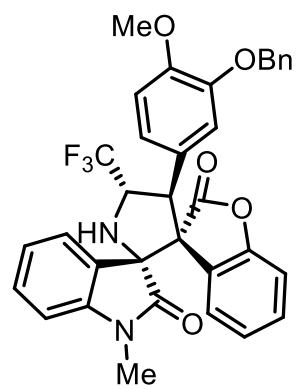

**Product 4p**

— -70.45

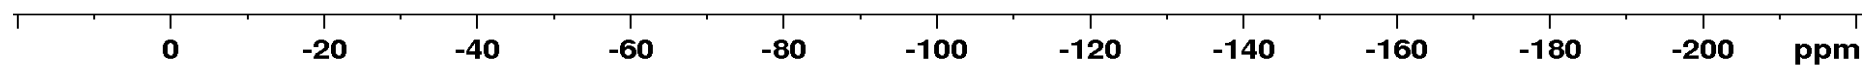

S89

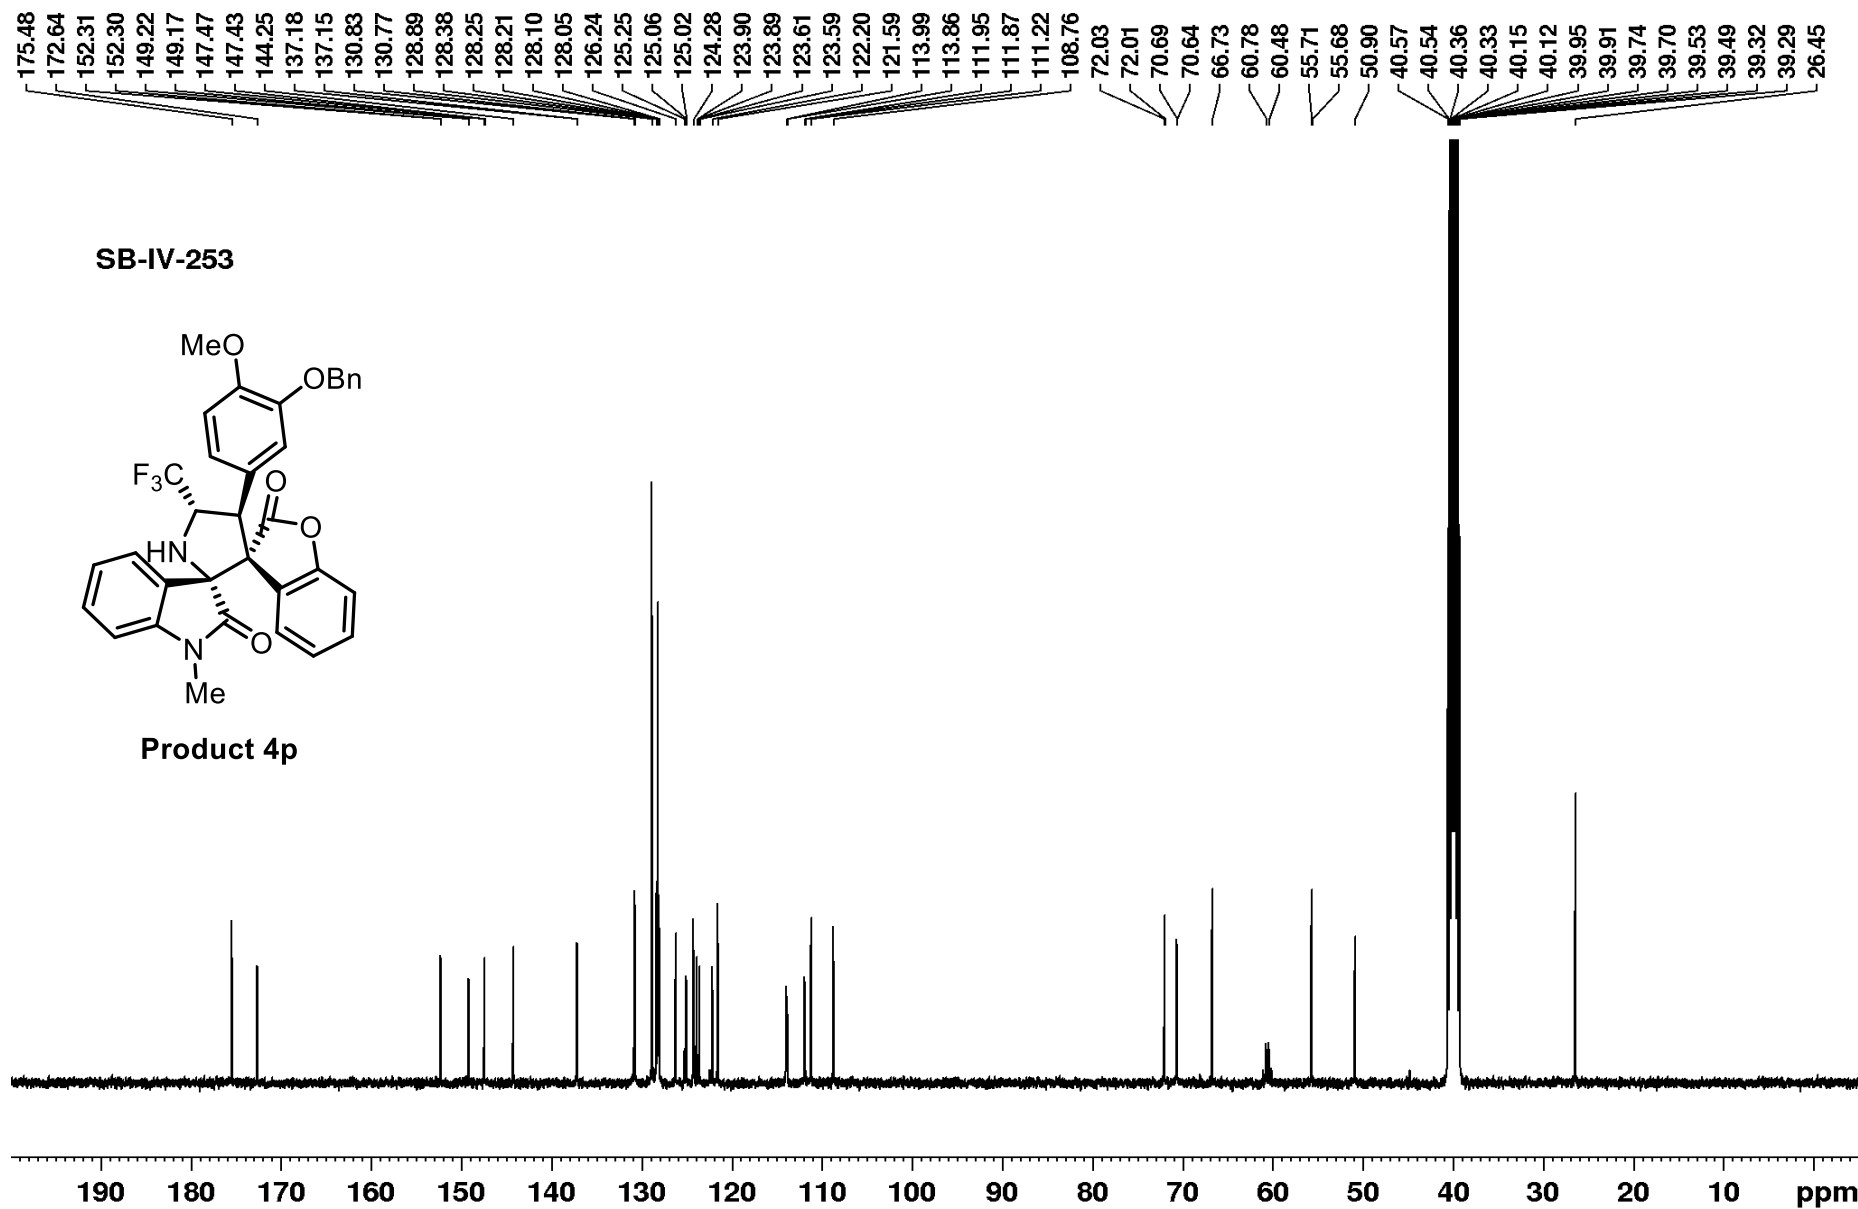

SB-IV-253

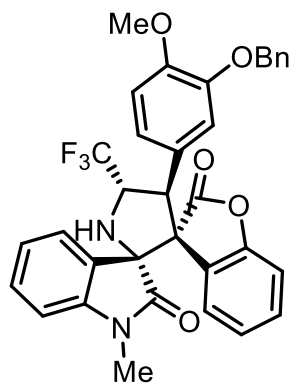

Product 4p

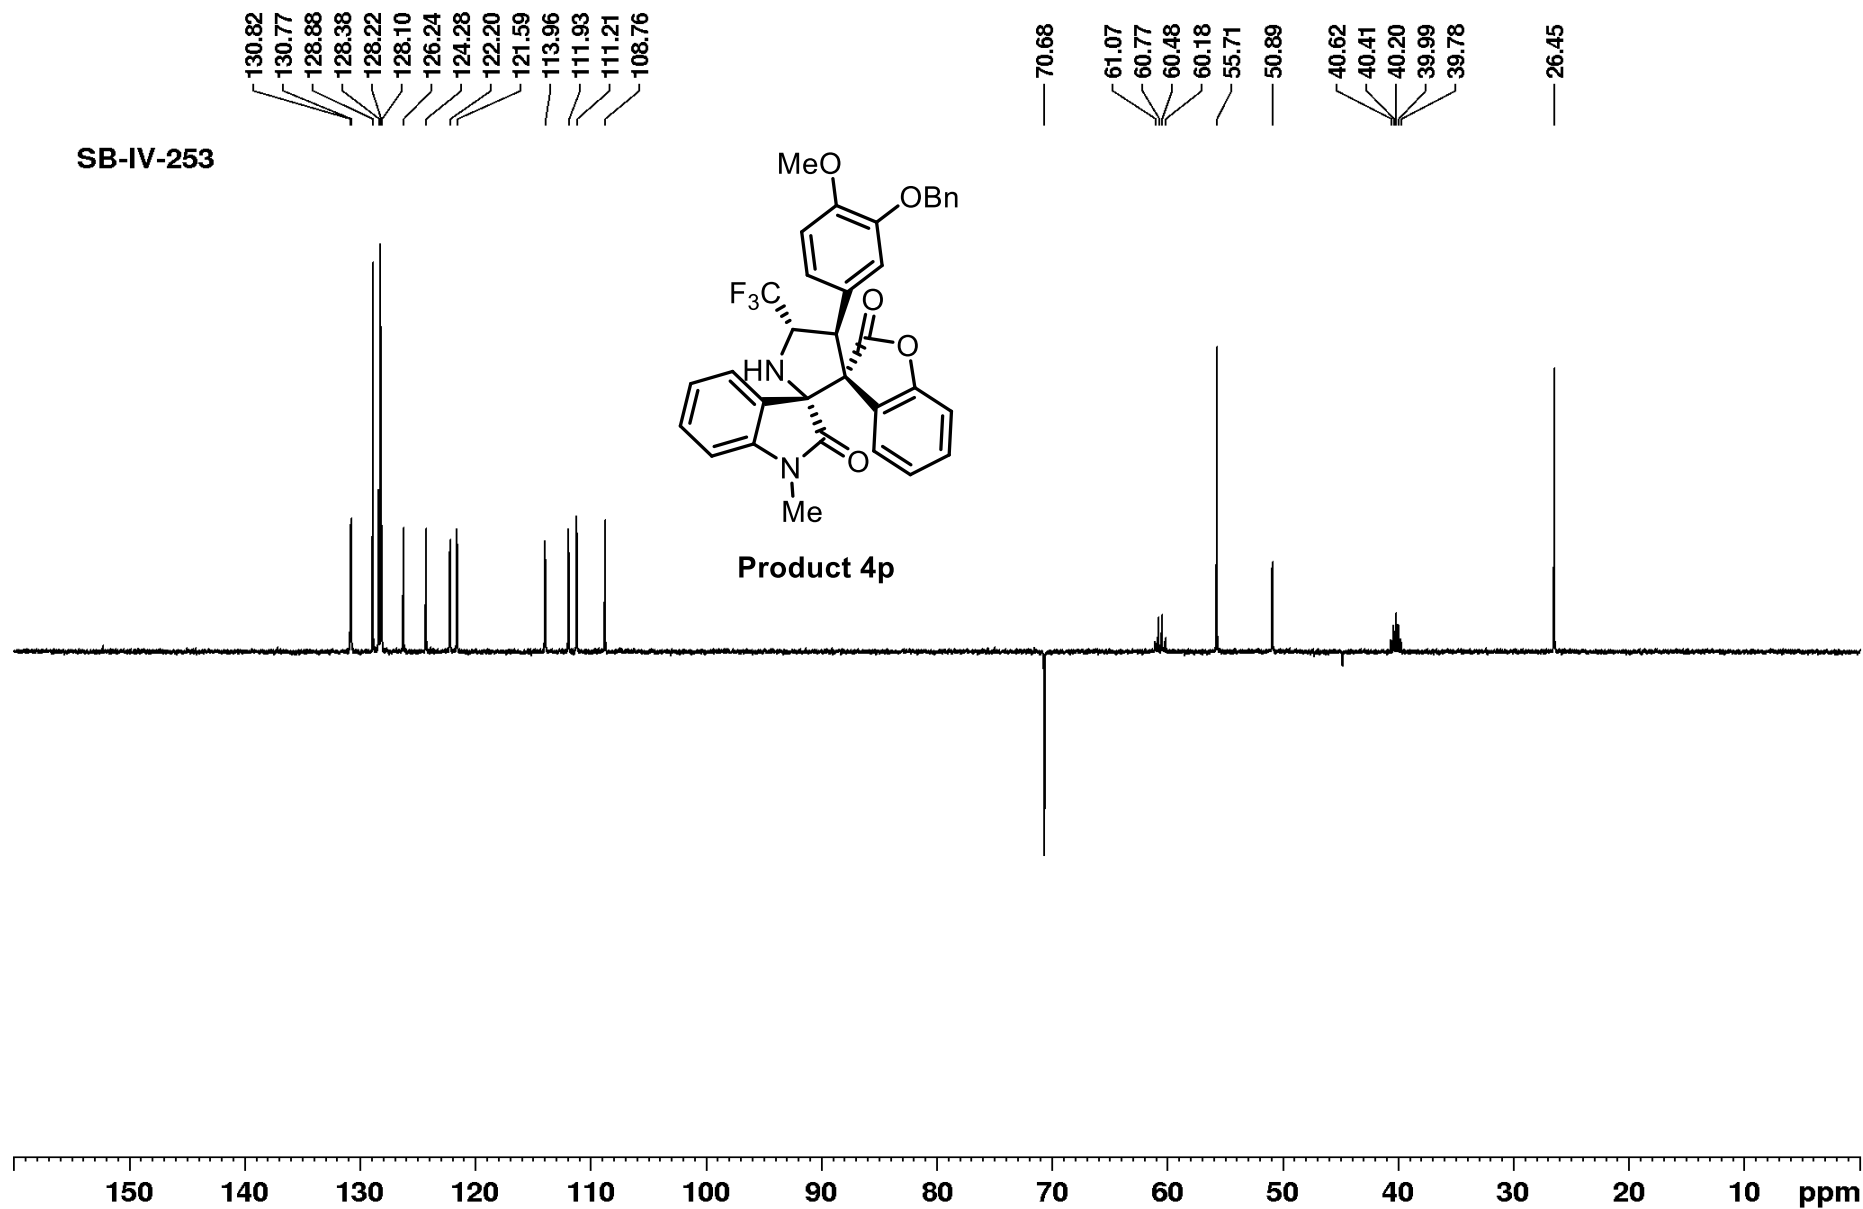

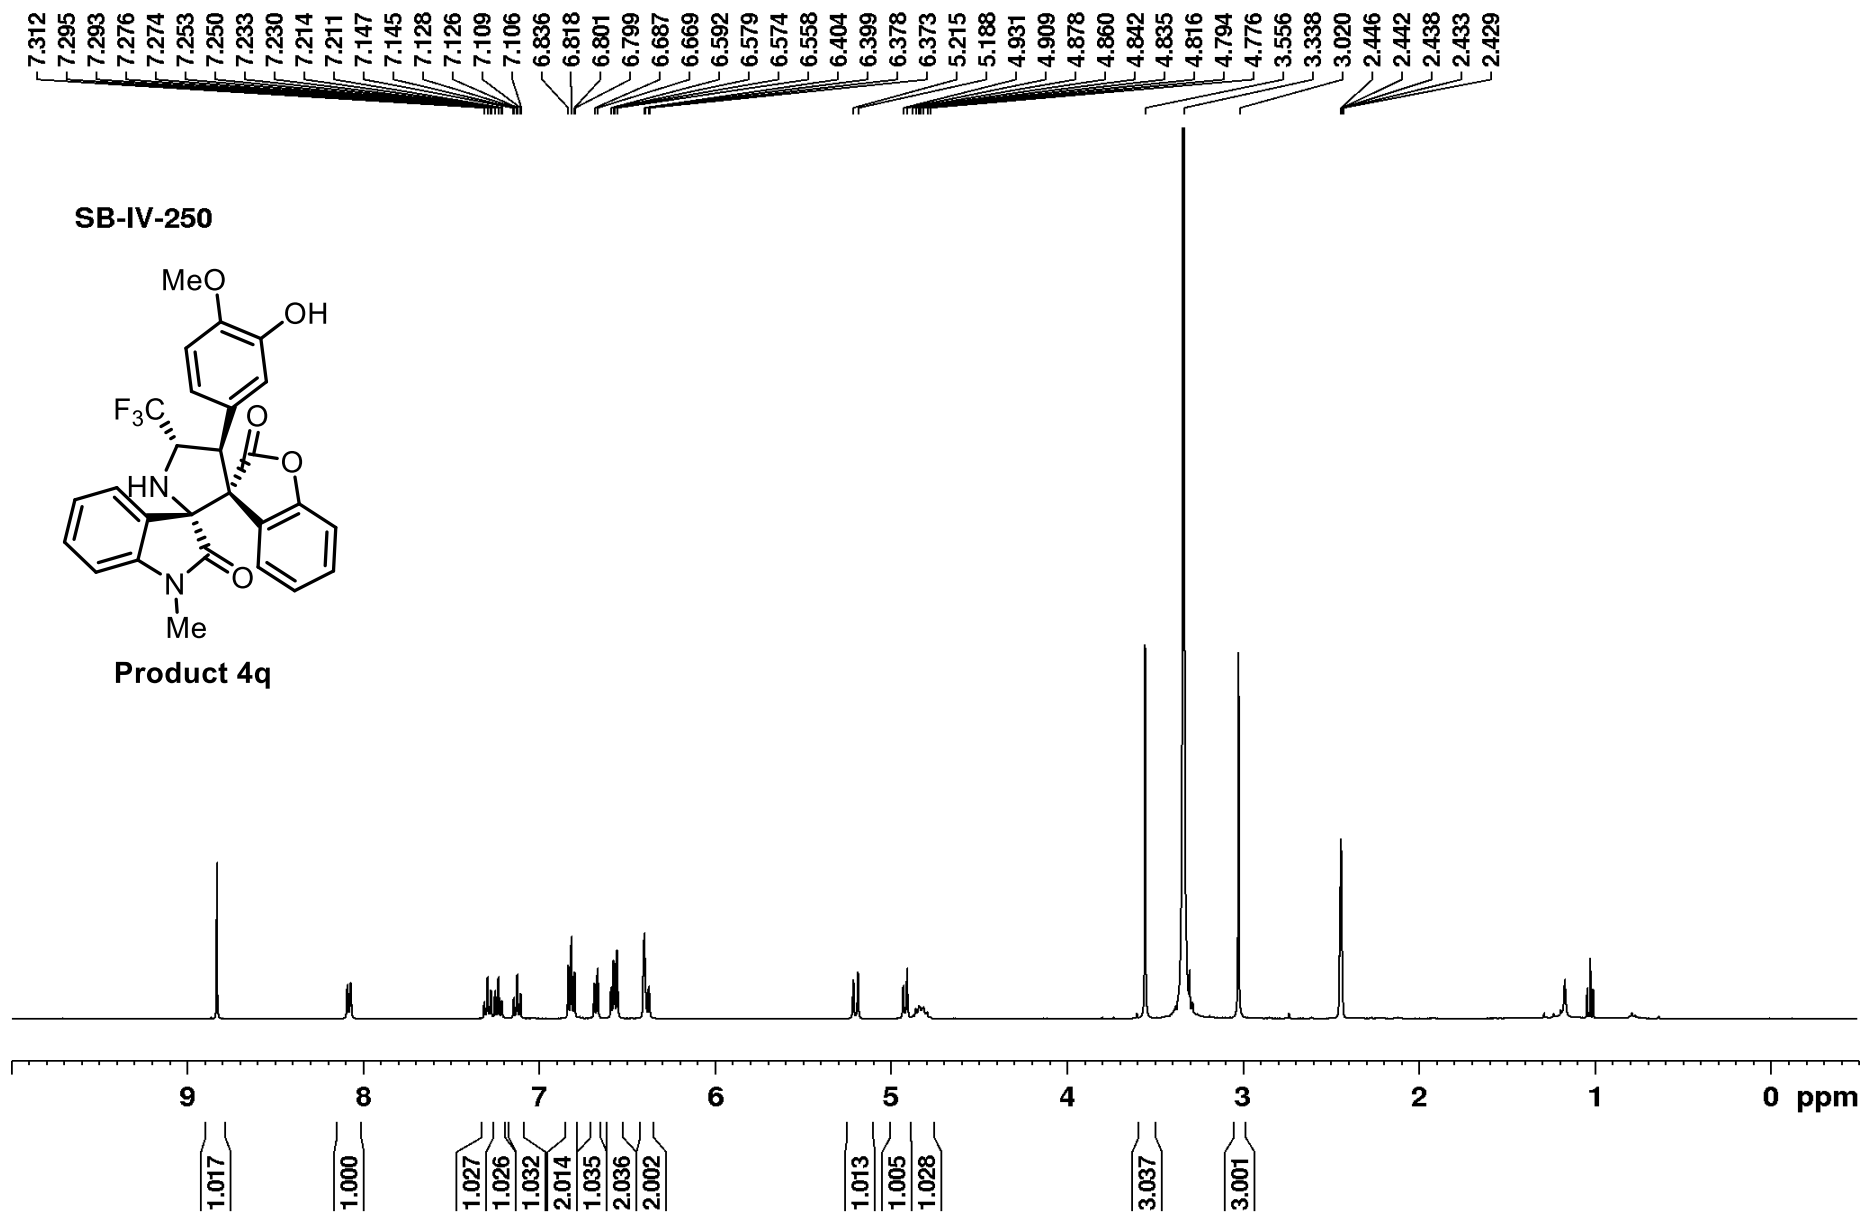



SB-IV-250

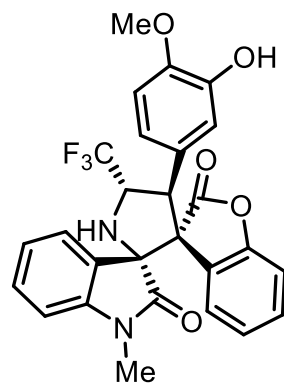

Product 4q

— -70.32

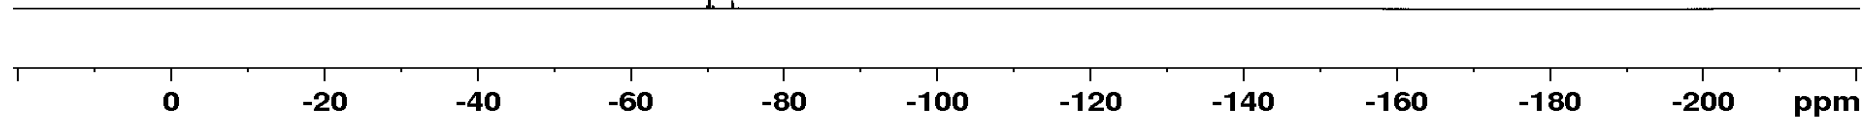

S93

SB-IV-250

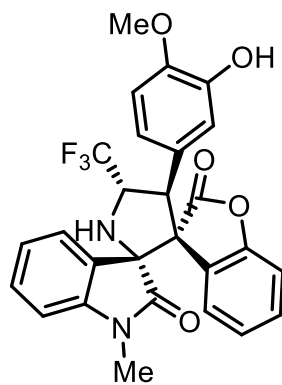

Product 4q

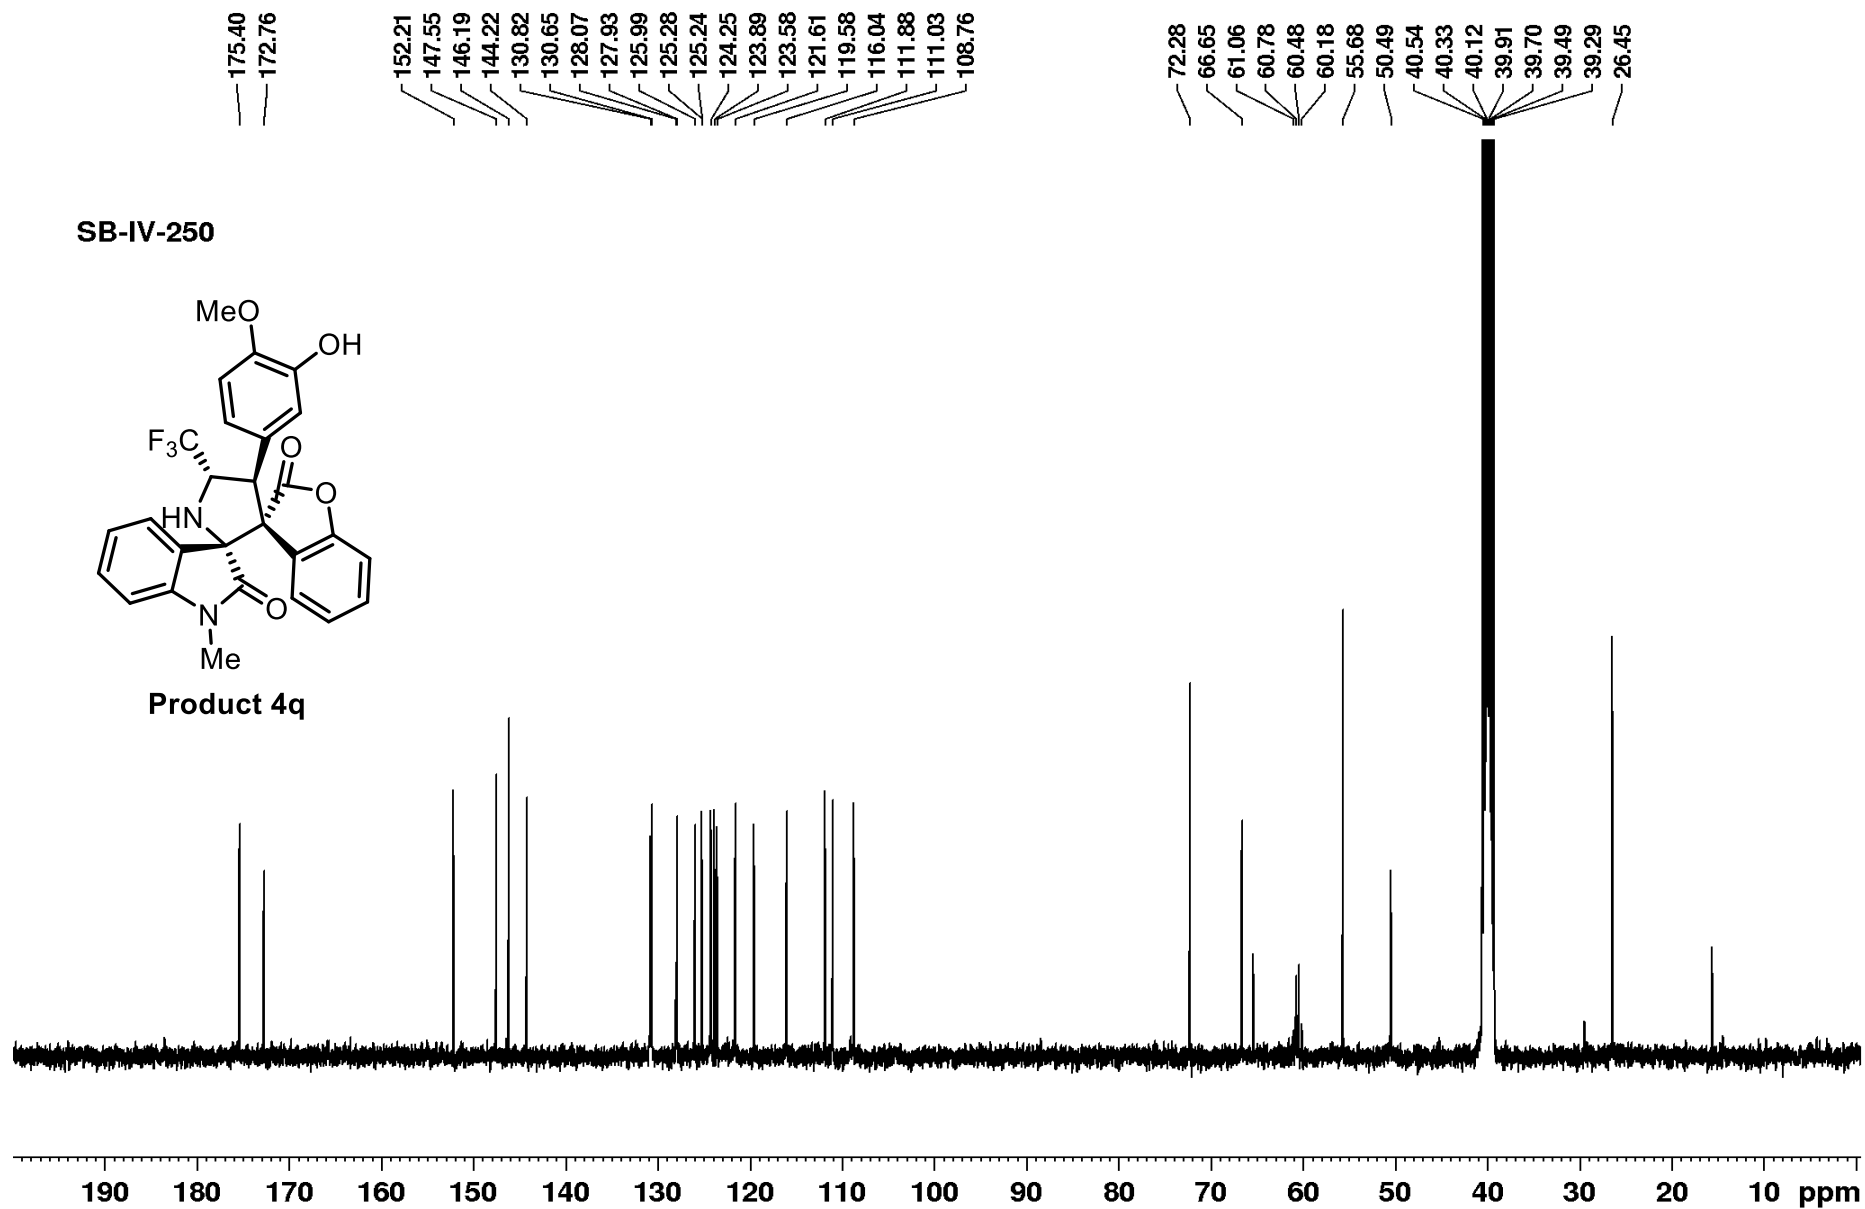

SB-IV-250

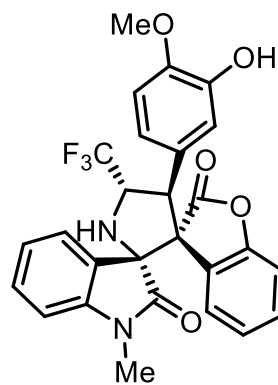

Product 4q

130.81  
130.65  
127.93  
125.99  
124.24  
121.59  
119.58  
116.06  
111.93  
111.02  
108.74

61.09  
60.80  
60.50  
60.21  
55.71  
50.50  
40.62  
40.41  
40.20  
39.99  
39.78  
26.45

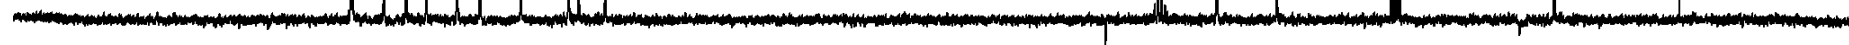

150 140 130 120 110 100 90 80 70 60 50 40 30 20 10 ppm

SB-IV-252

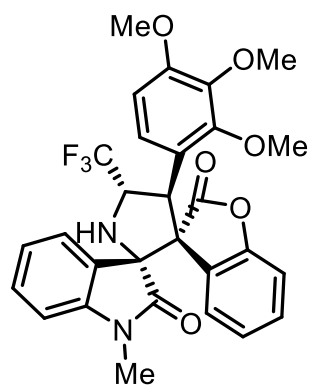

Product 4r

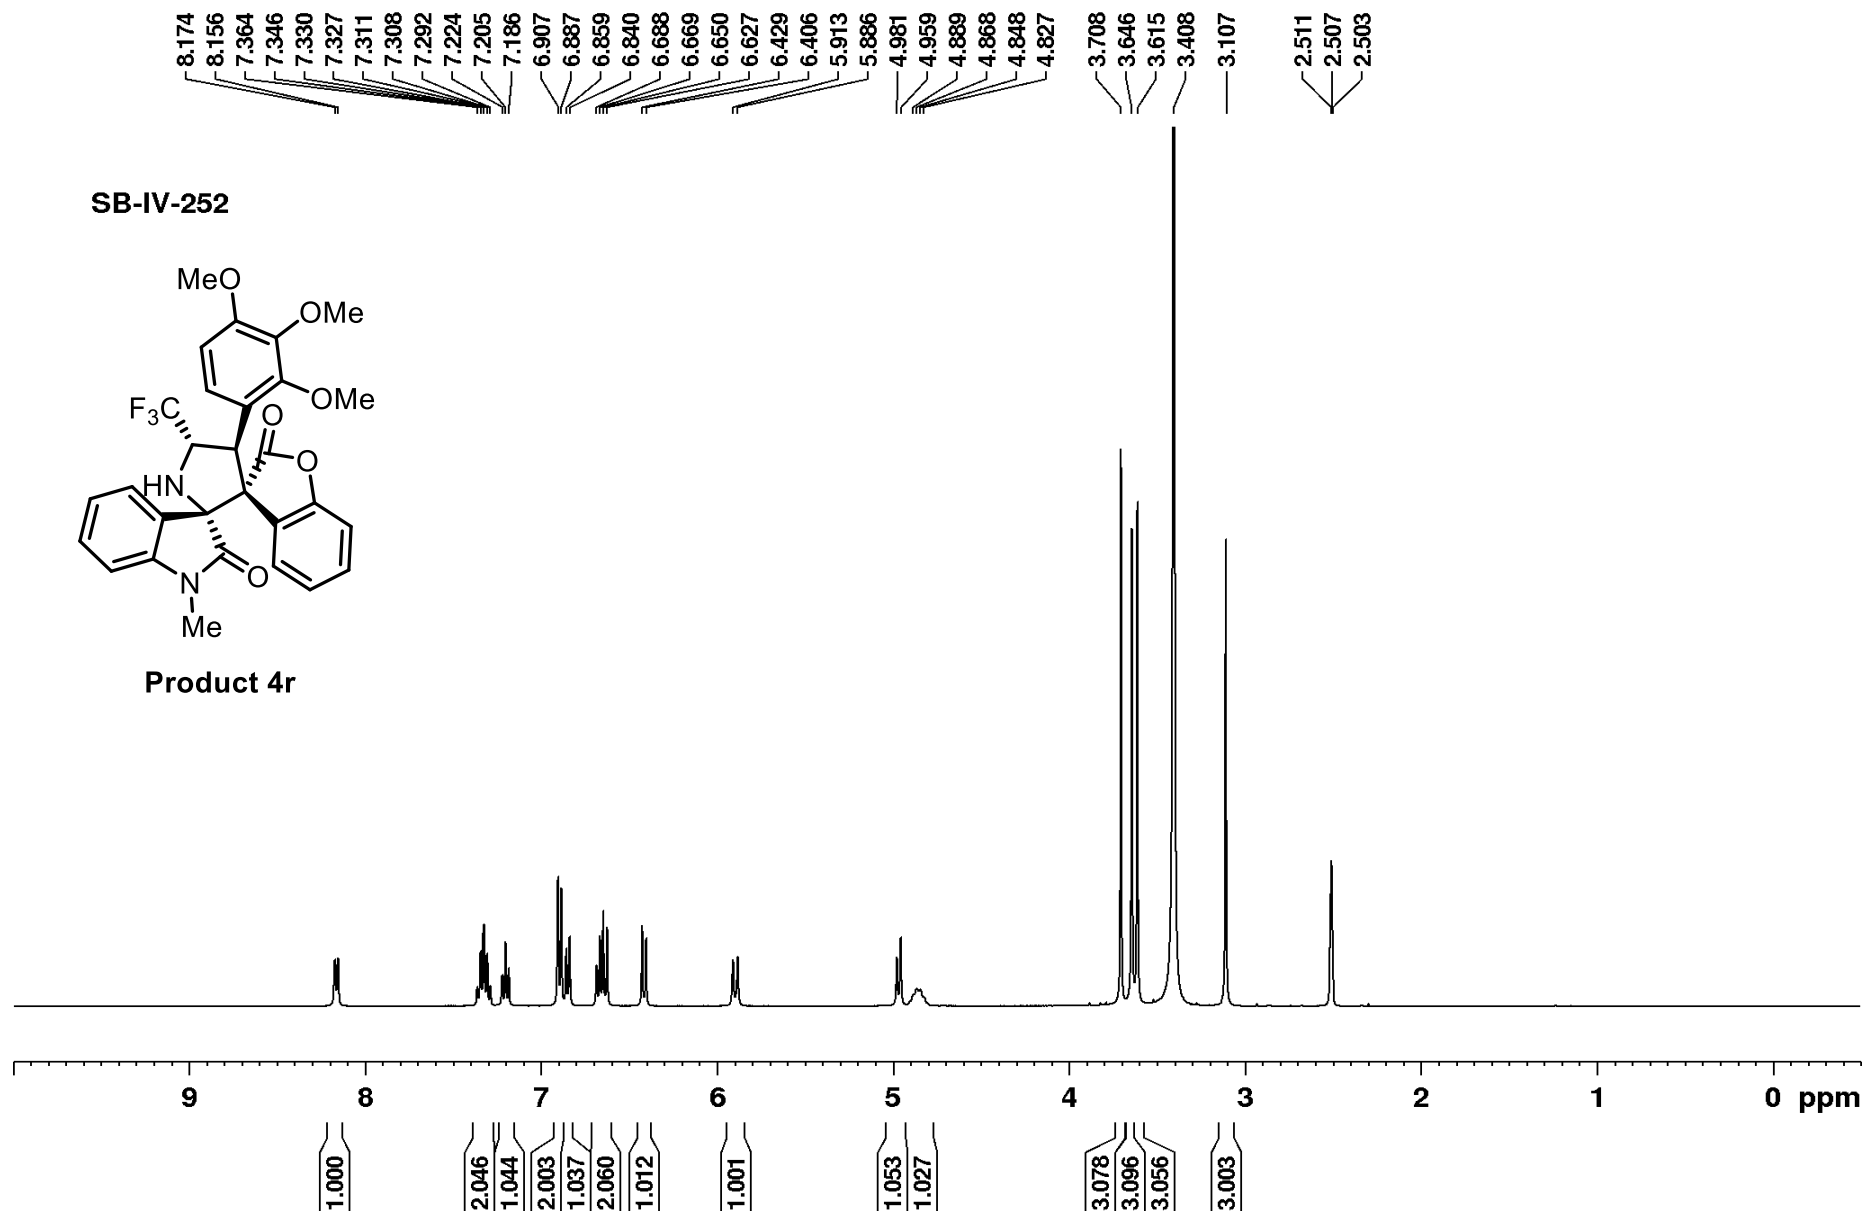

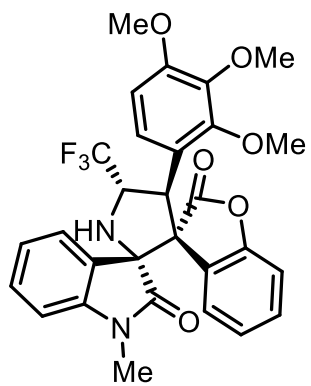

**Product 4r**

**SB-IV-252**

— -70.08



S97

SB-IV-252

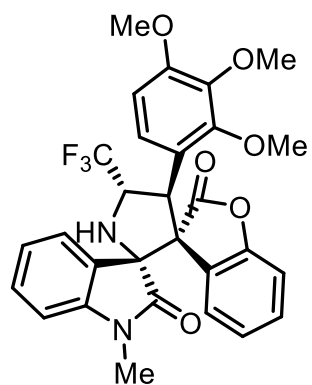

Product 4r

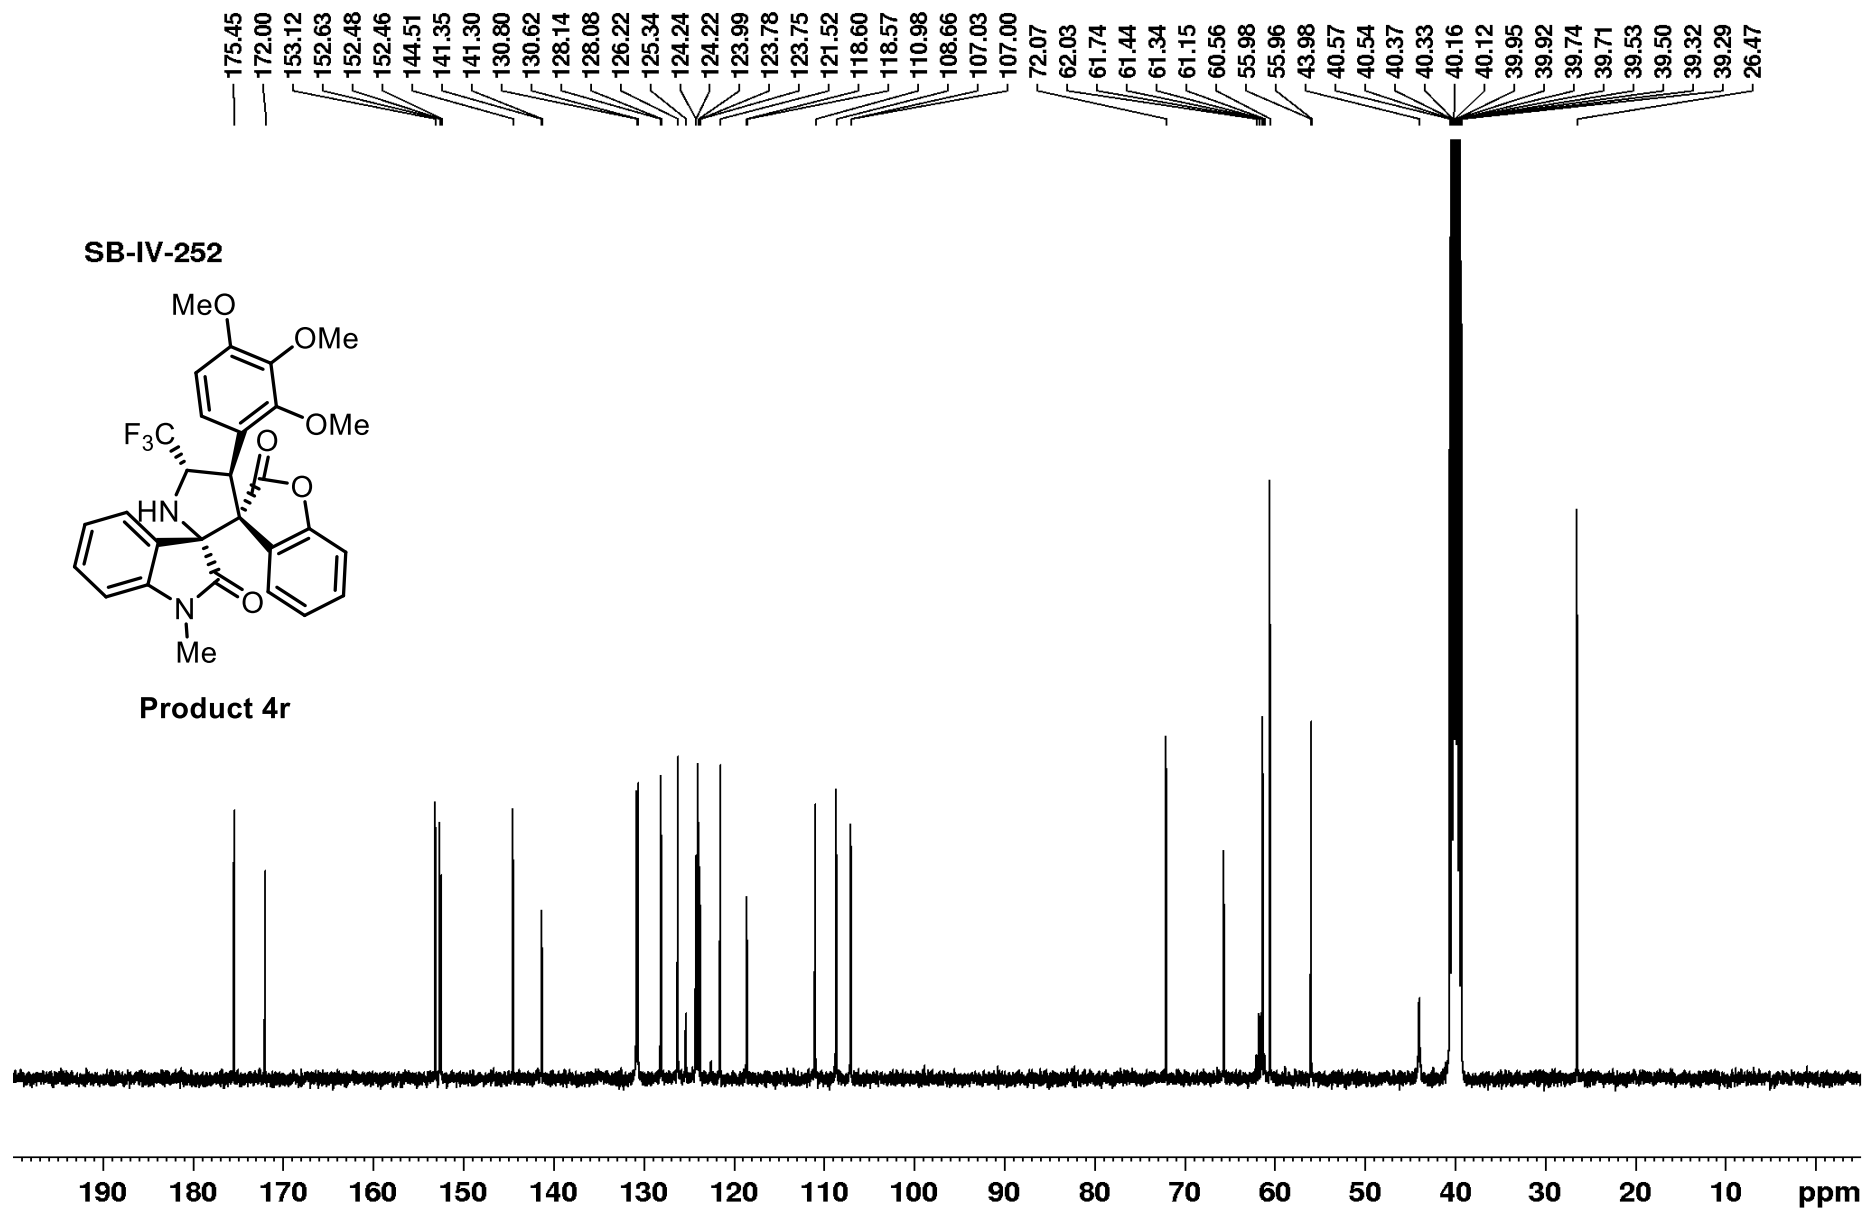

SB-IV-252

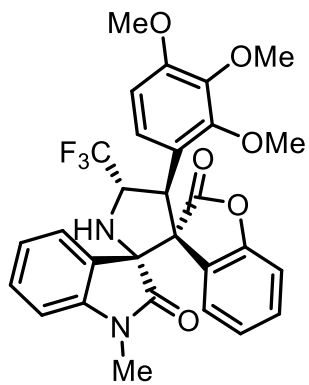

Product 4r

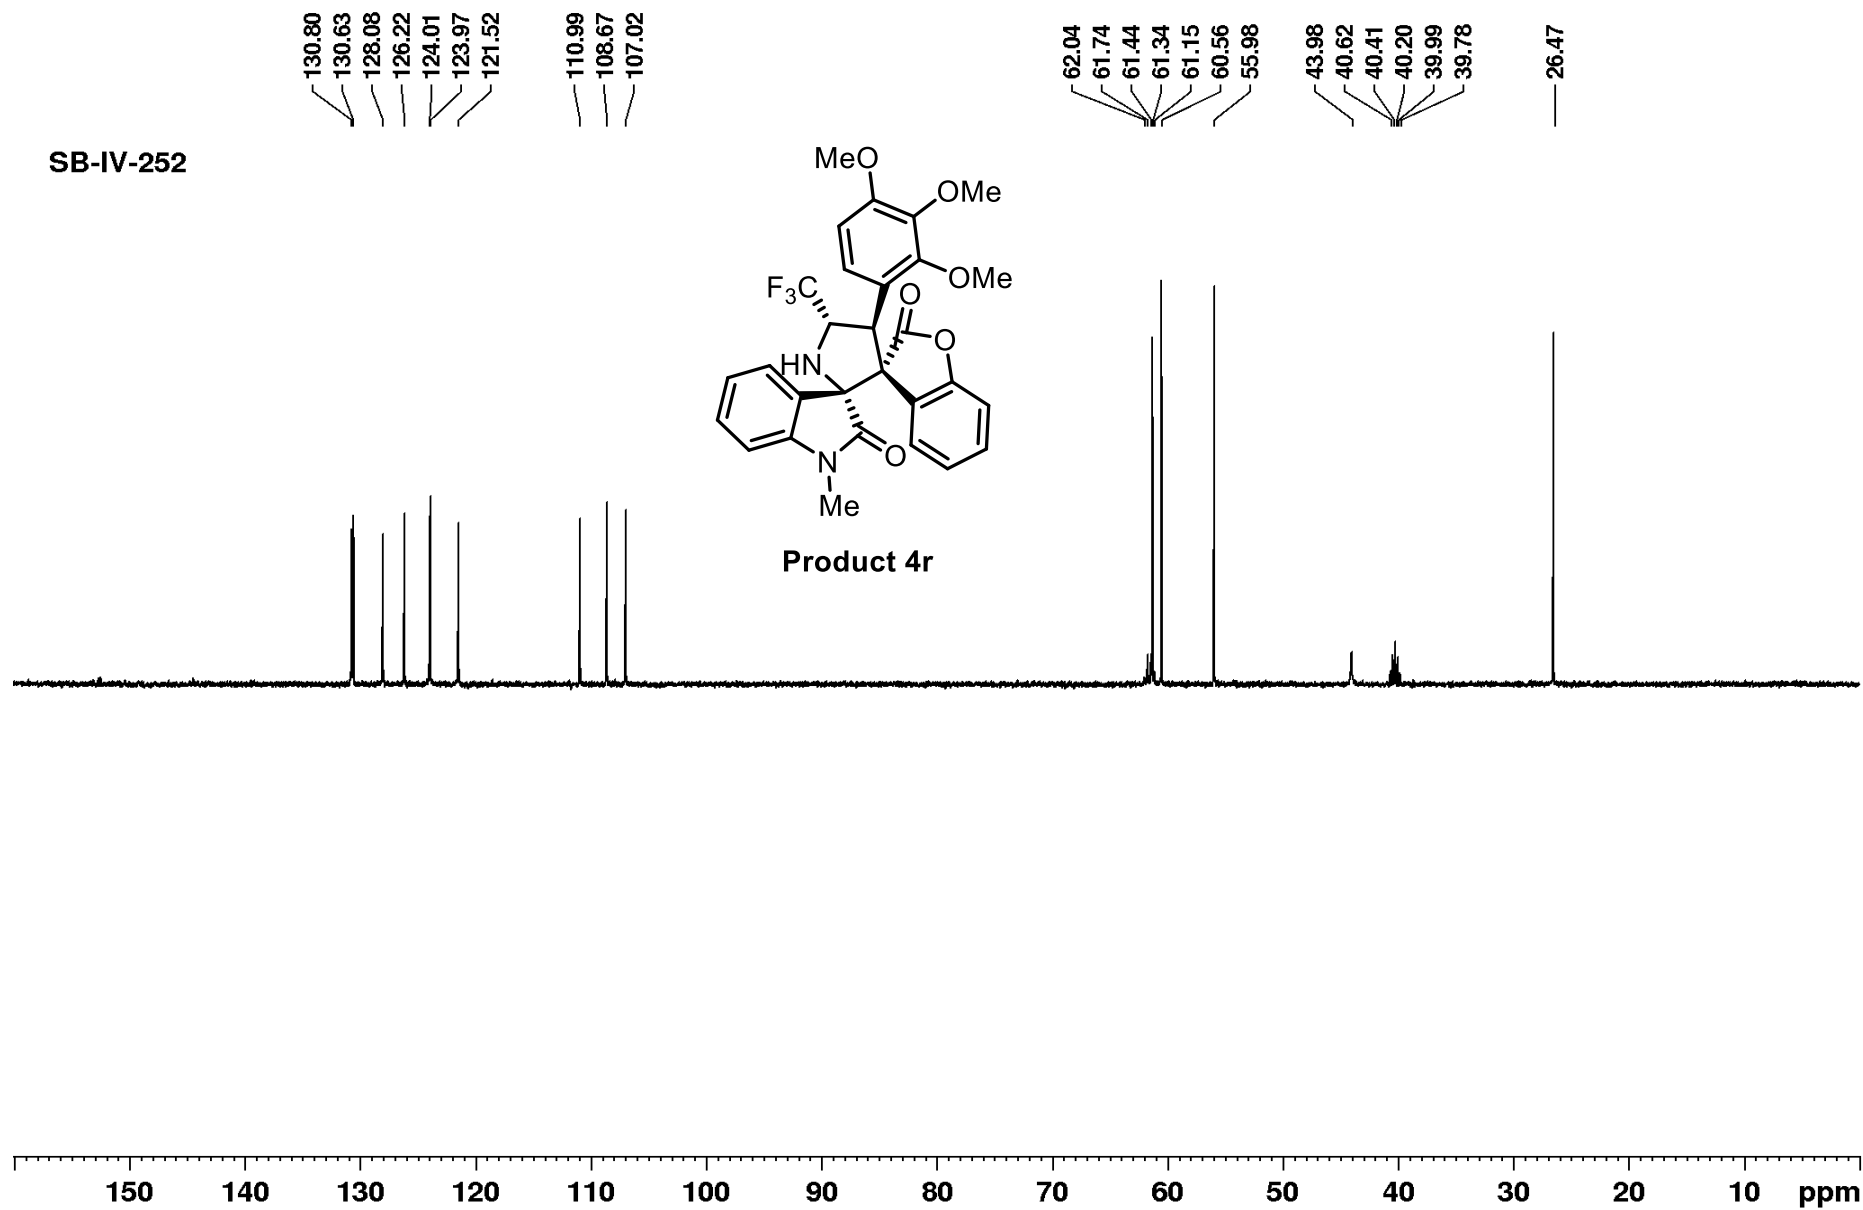

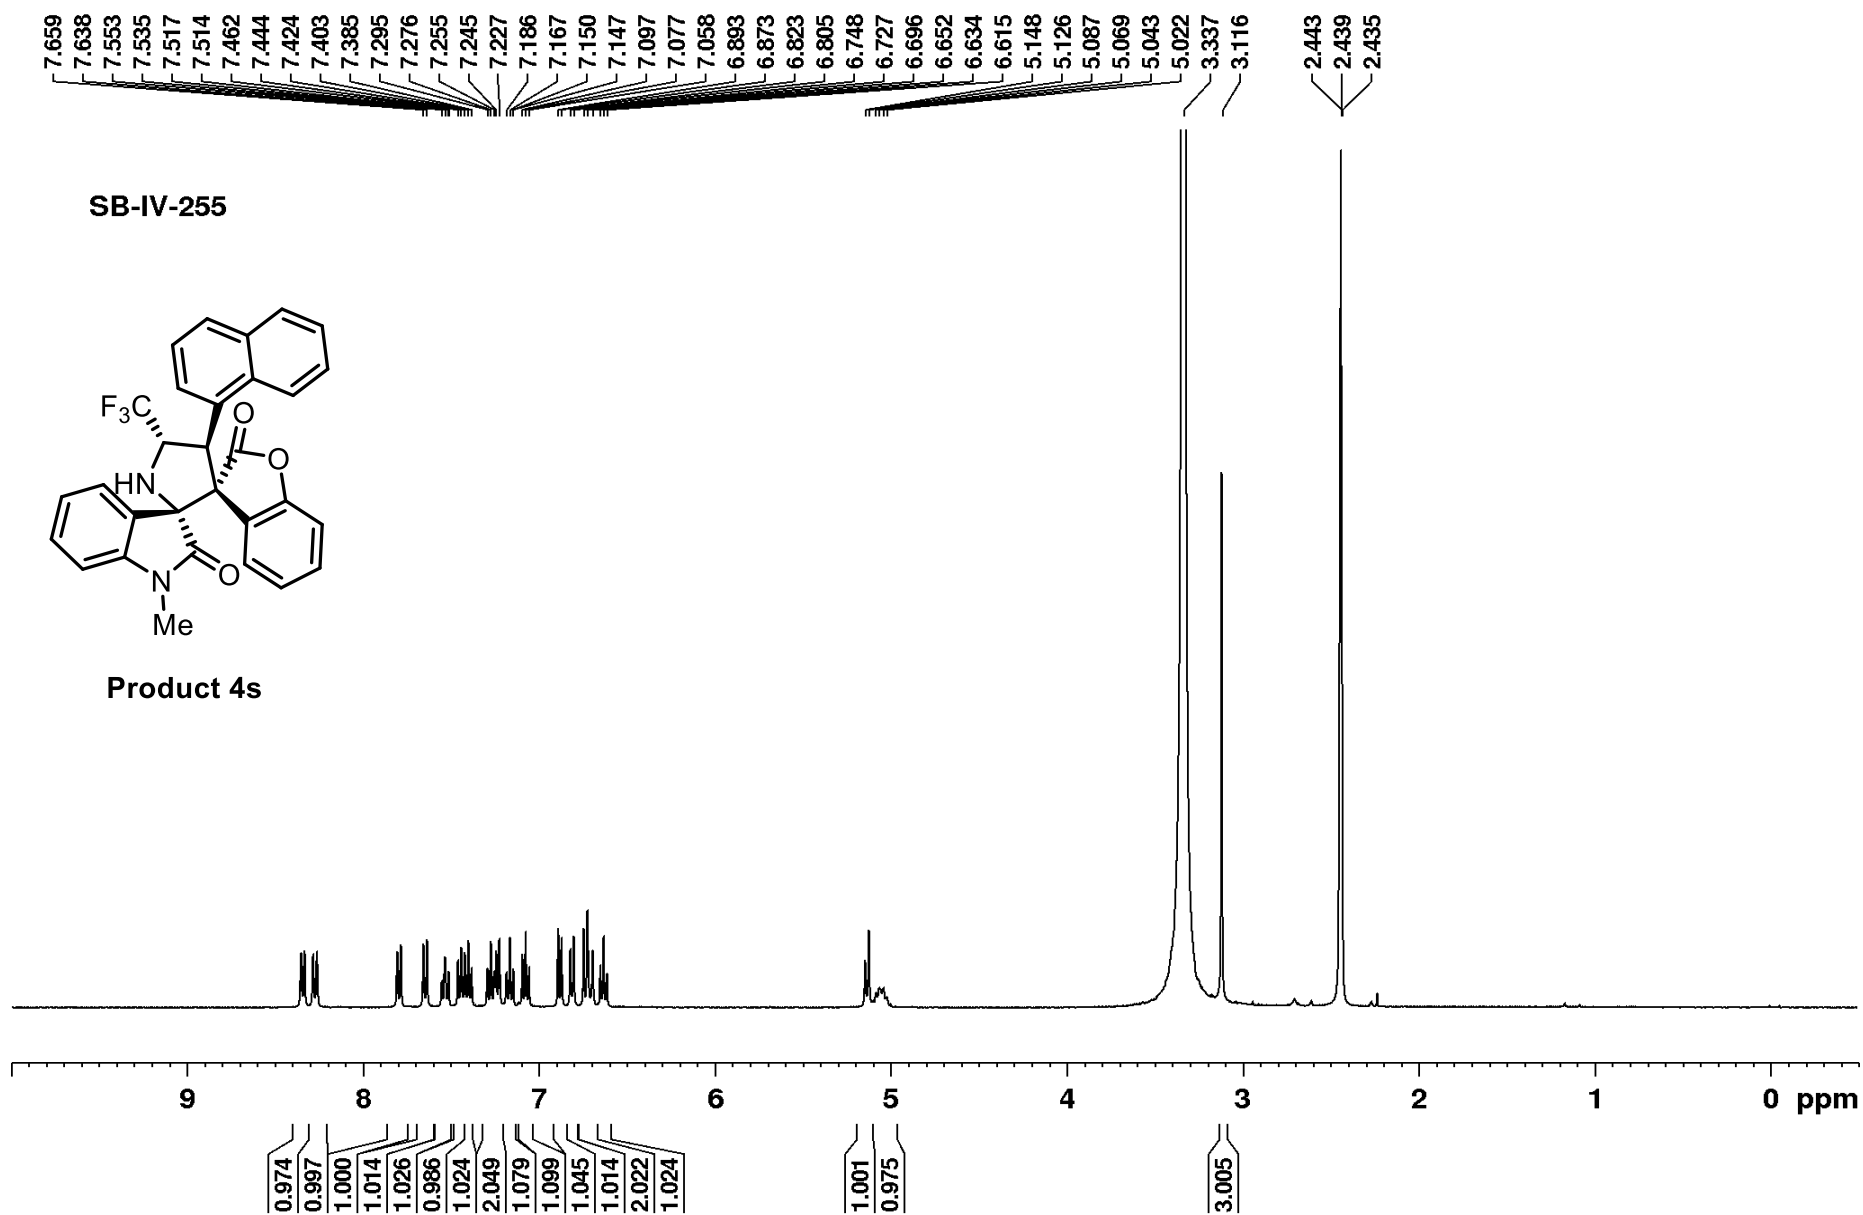



SB-IV-255

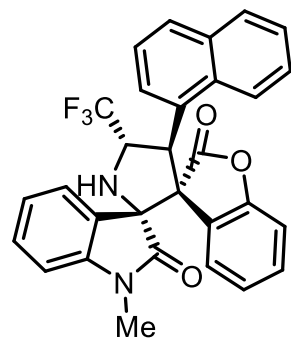

Product 4s

— -70.57

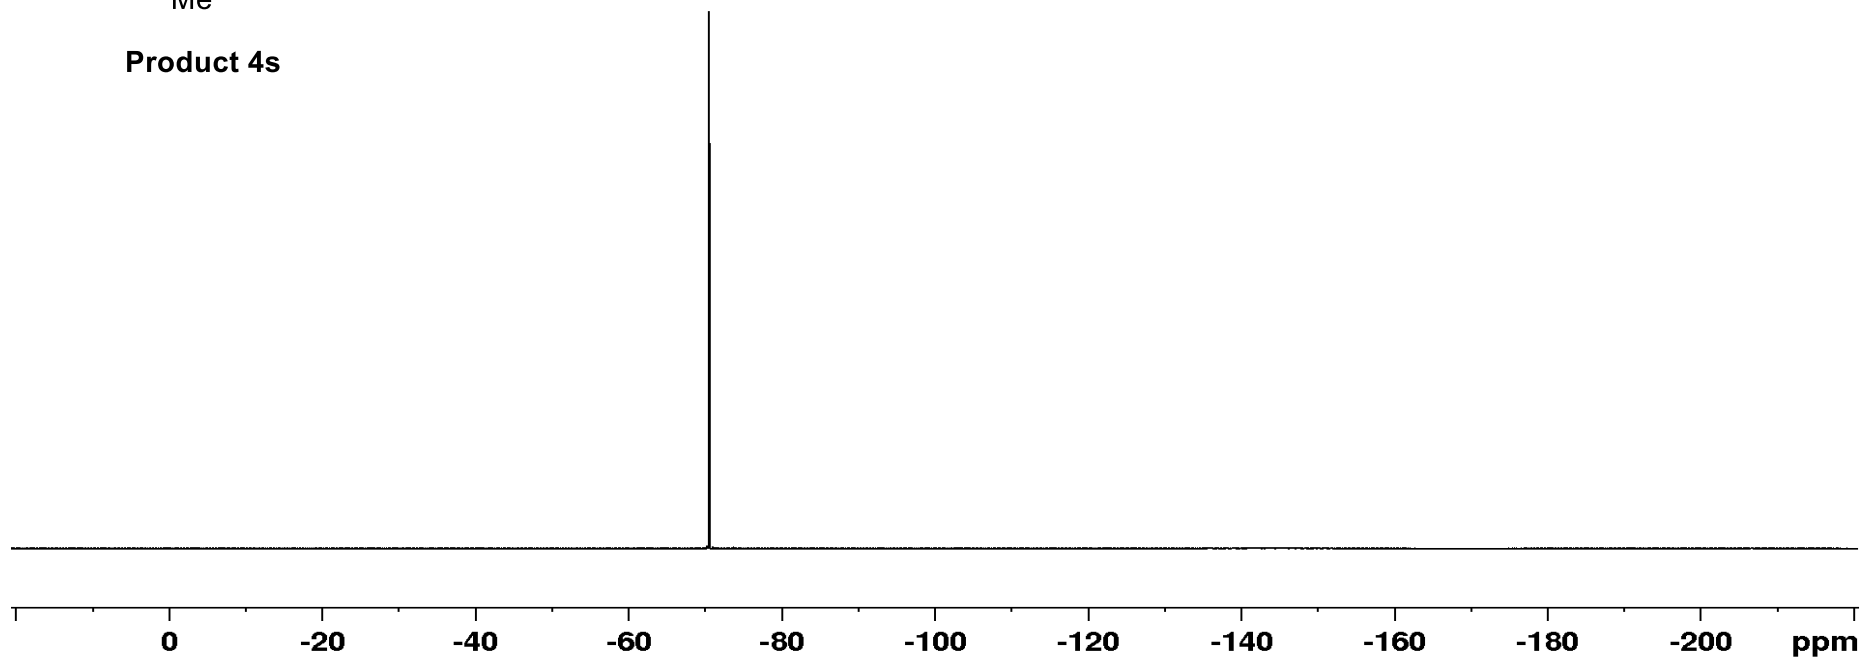

S101

SB-IV-255

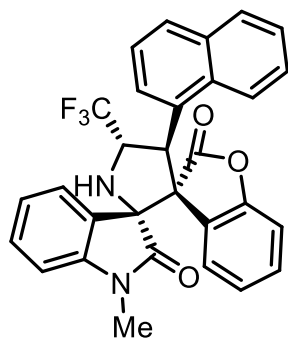

Product 4s

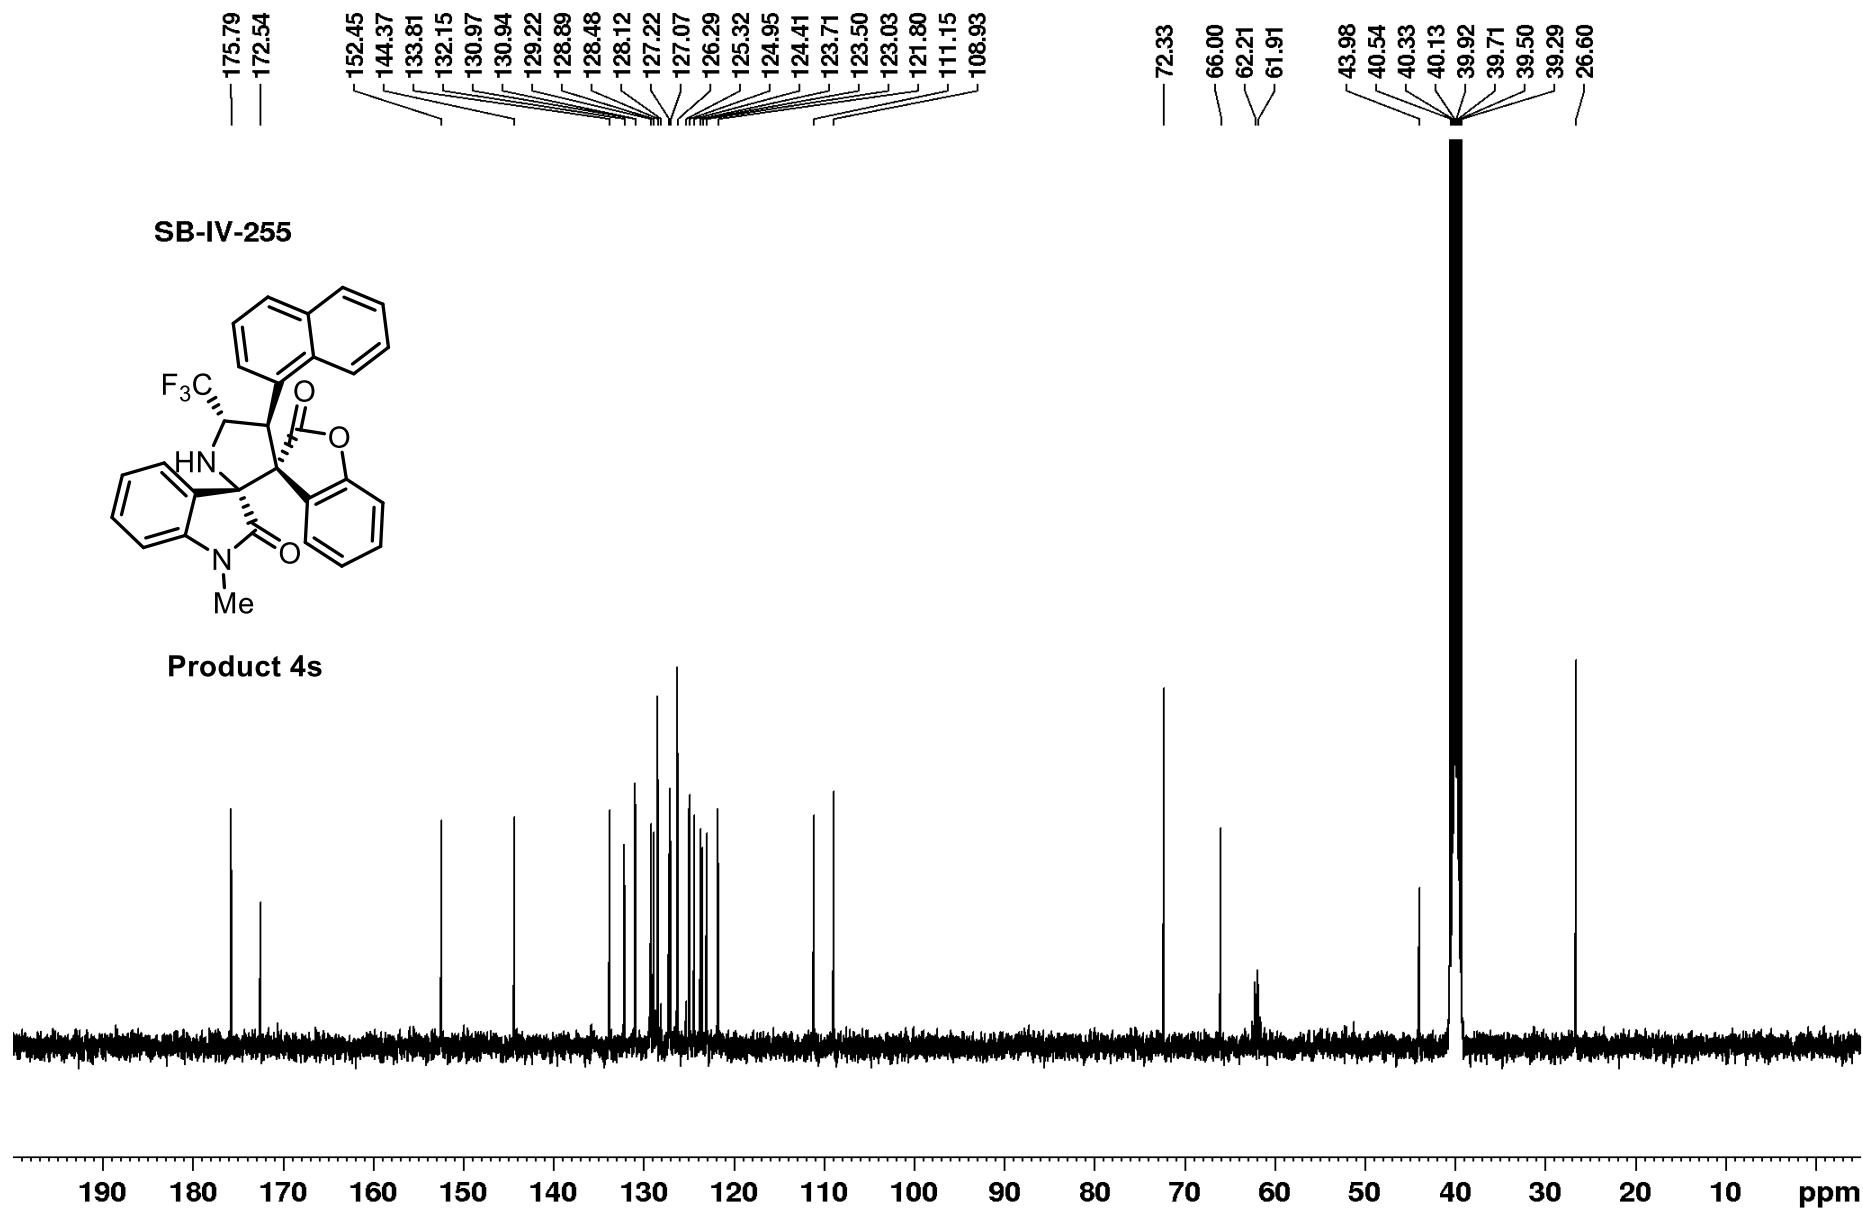

SB-IV-255

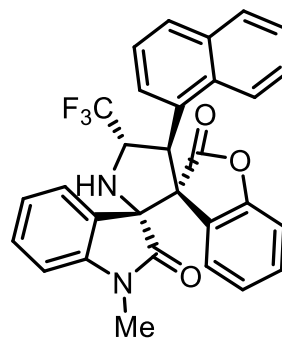

Product 4s

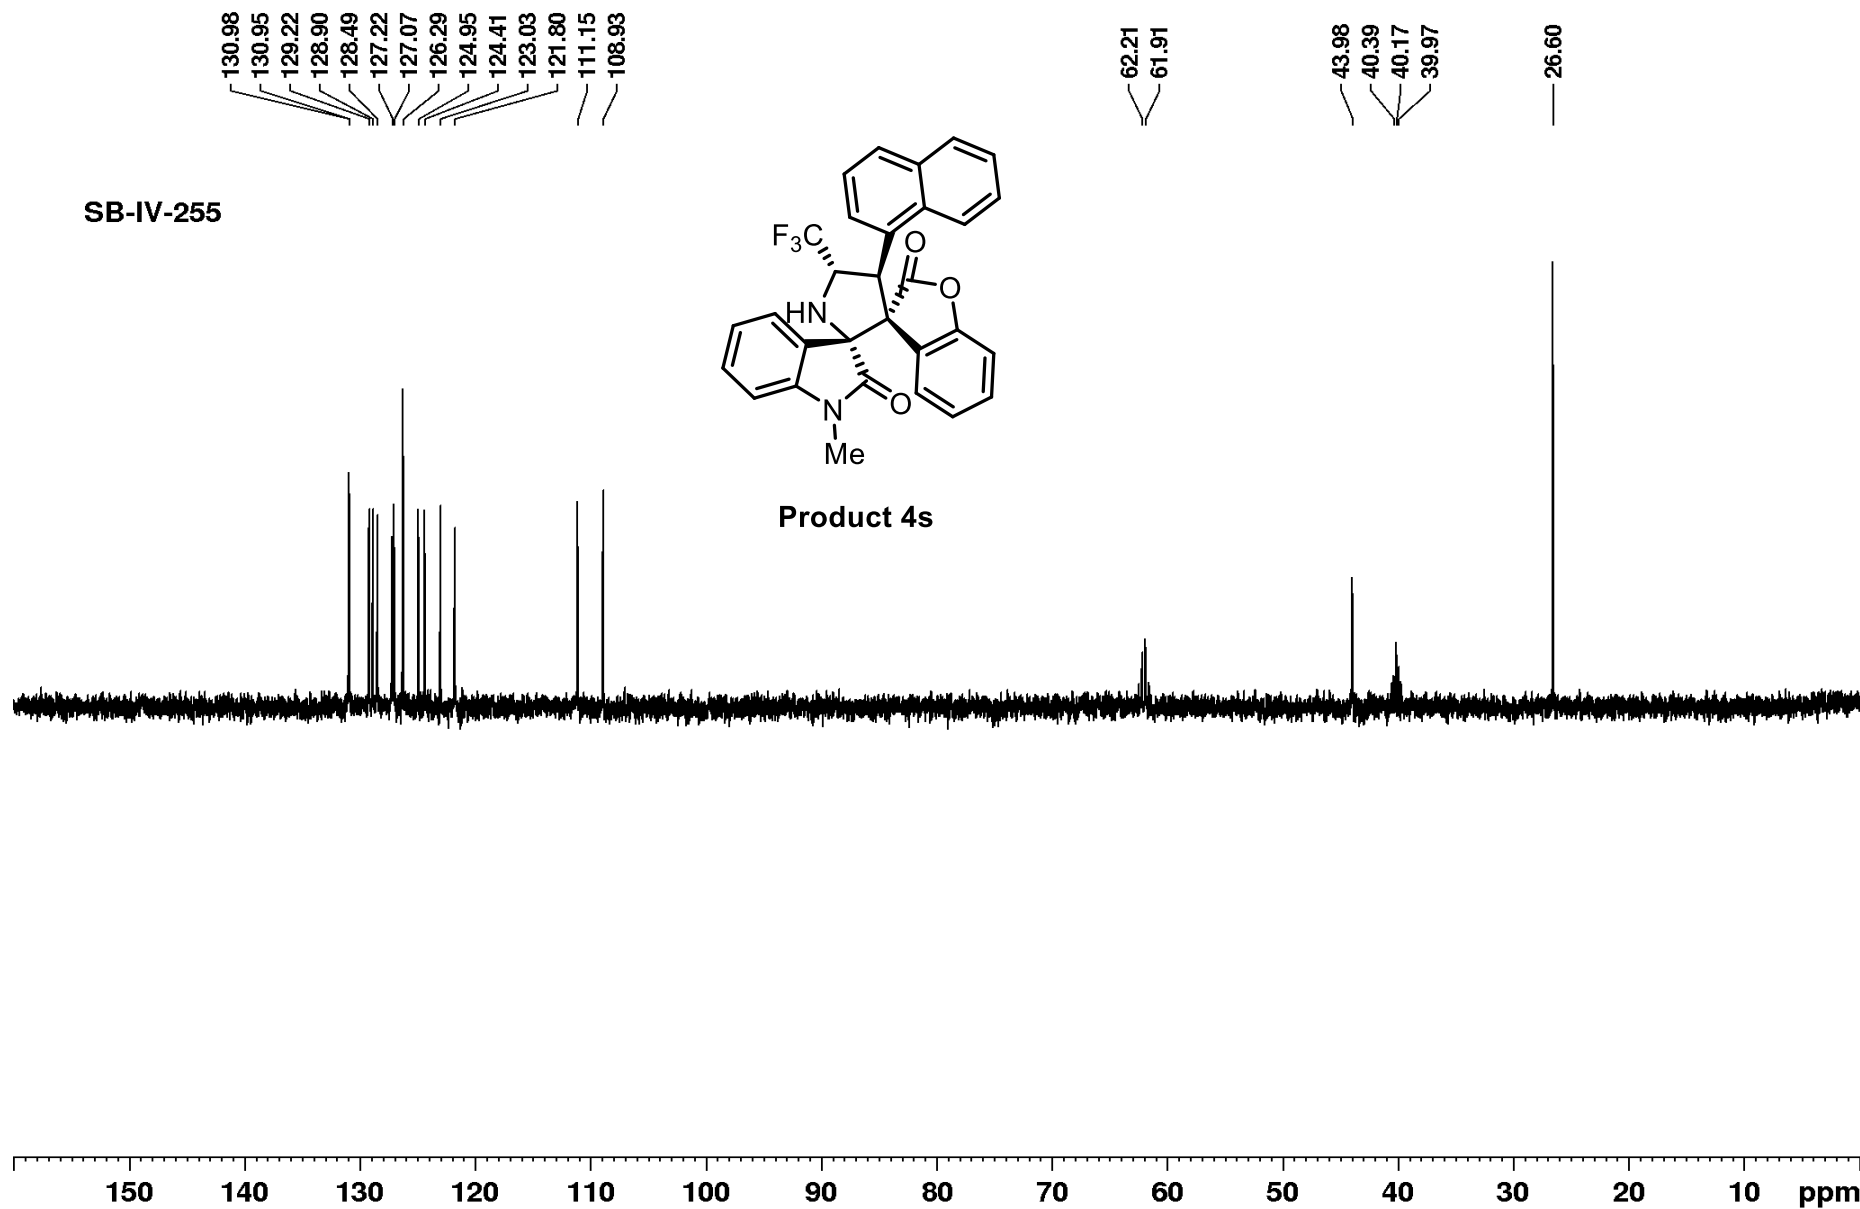

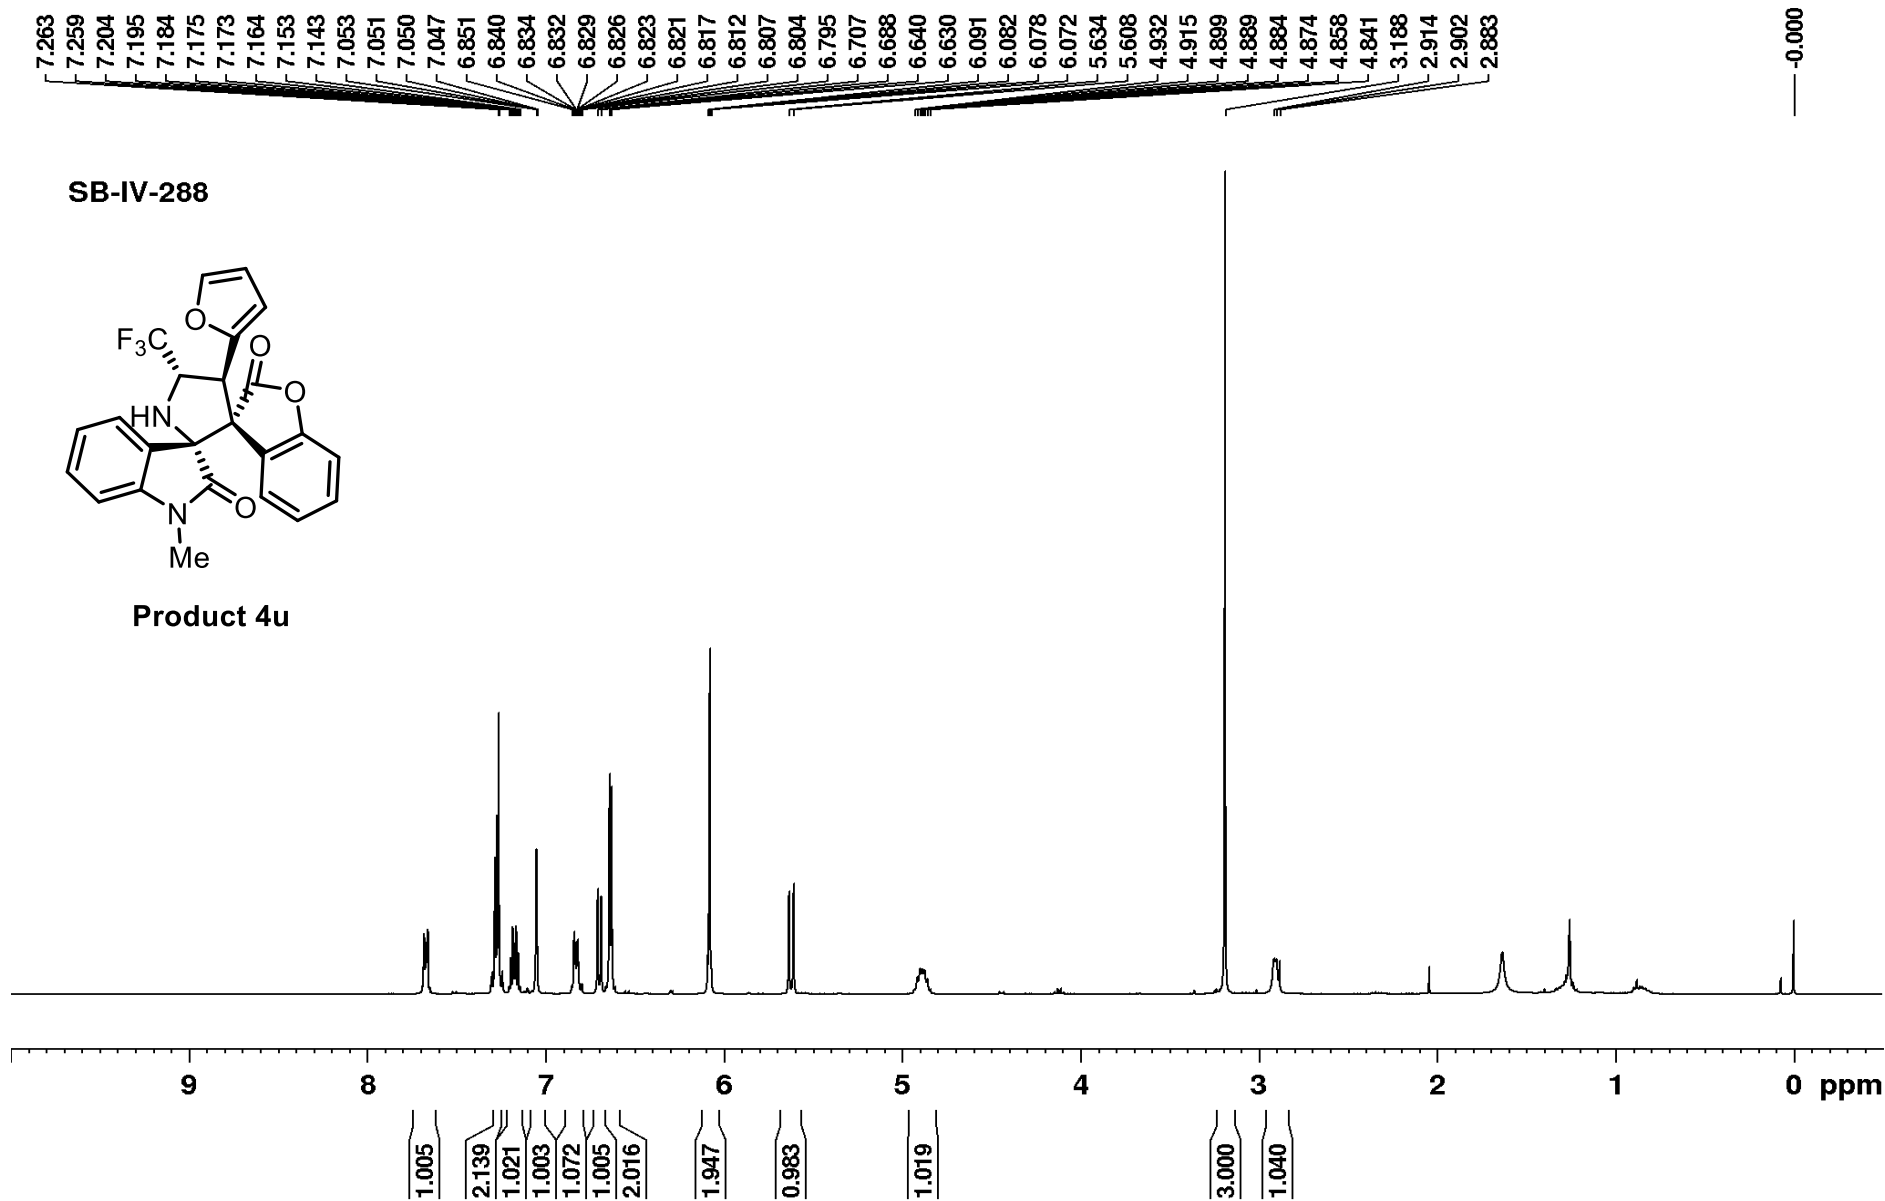

S104

SB-IV-288

— -72.00

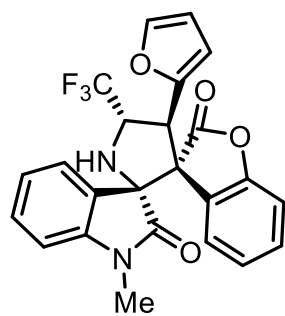

Product 4u

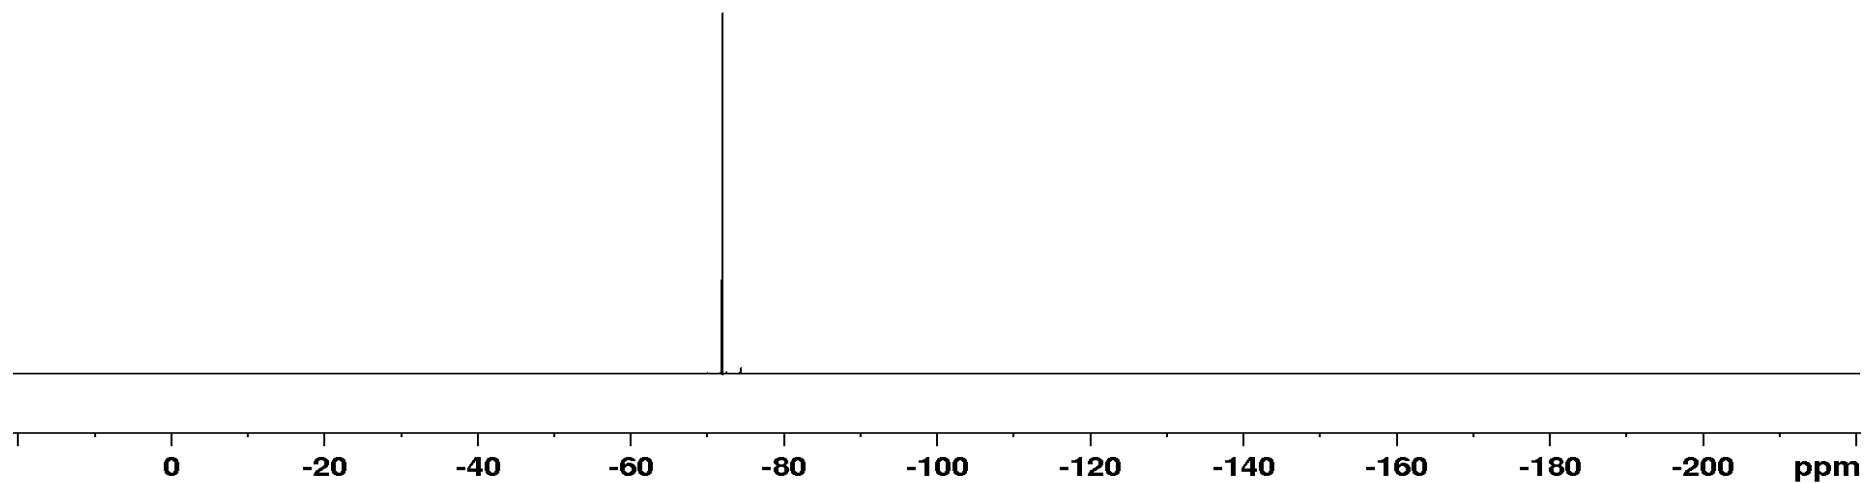

S105

SB-IV-288

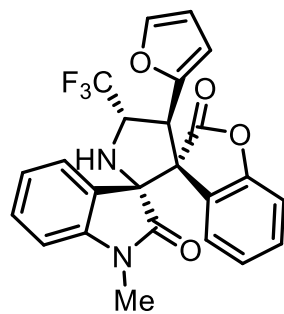

Product 4u

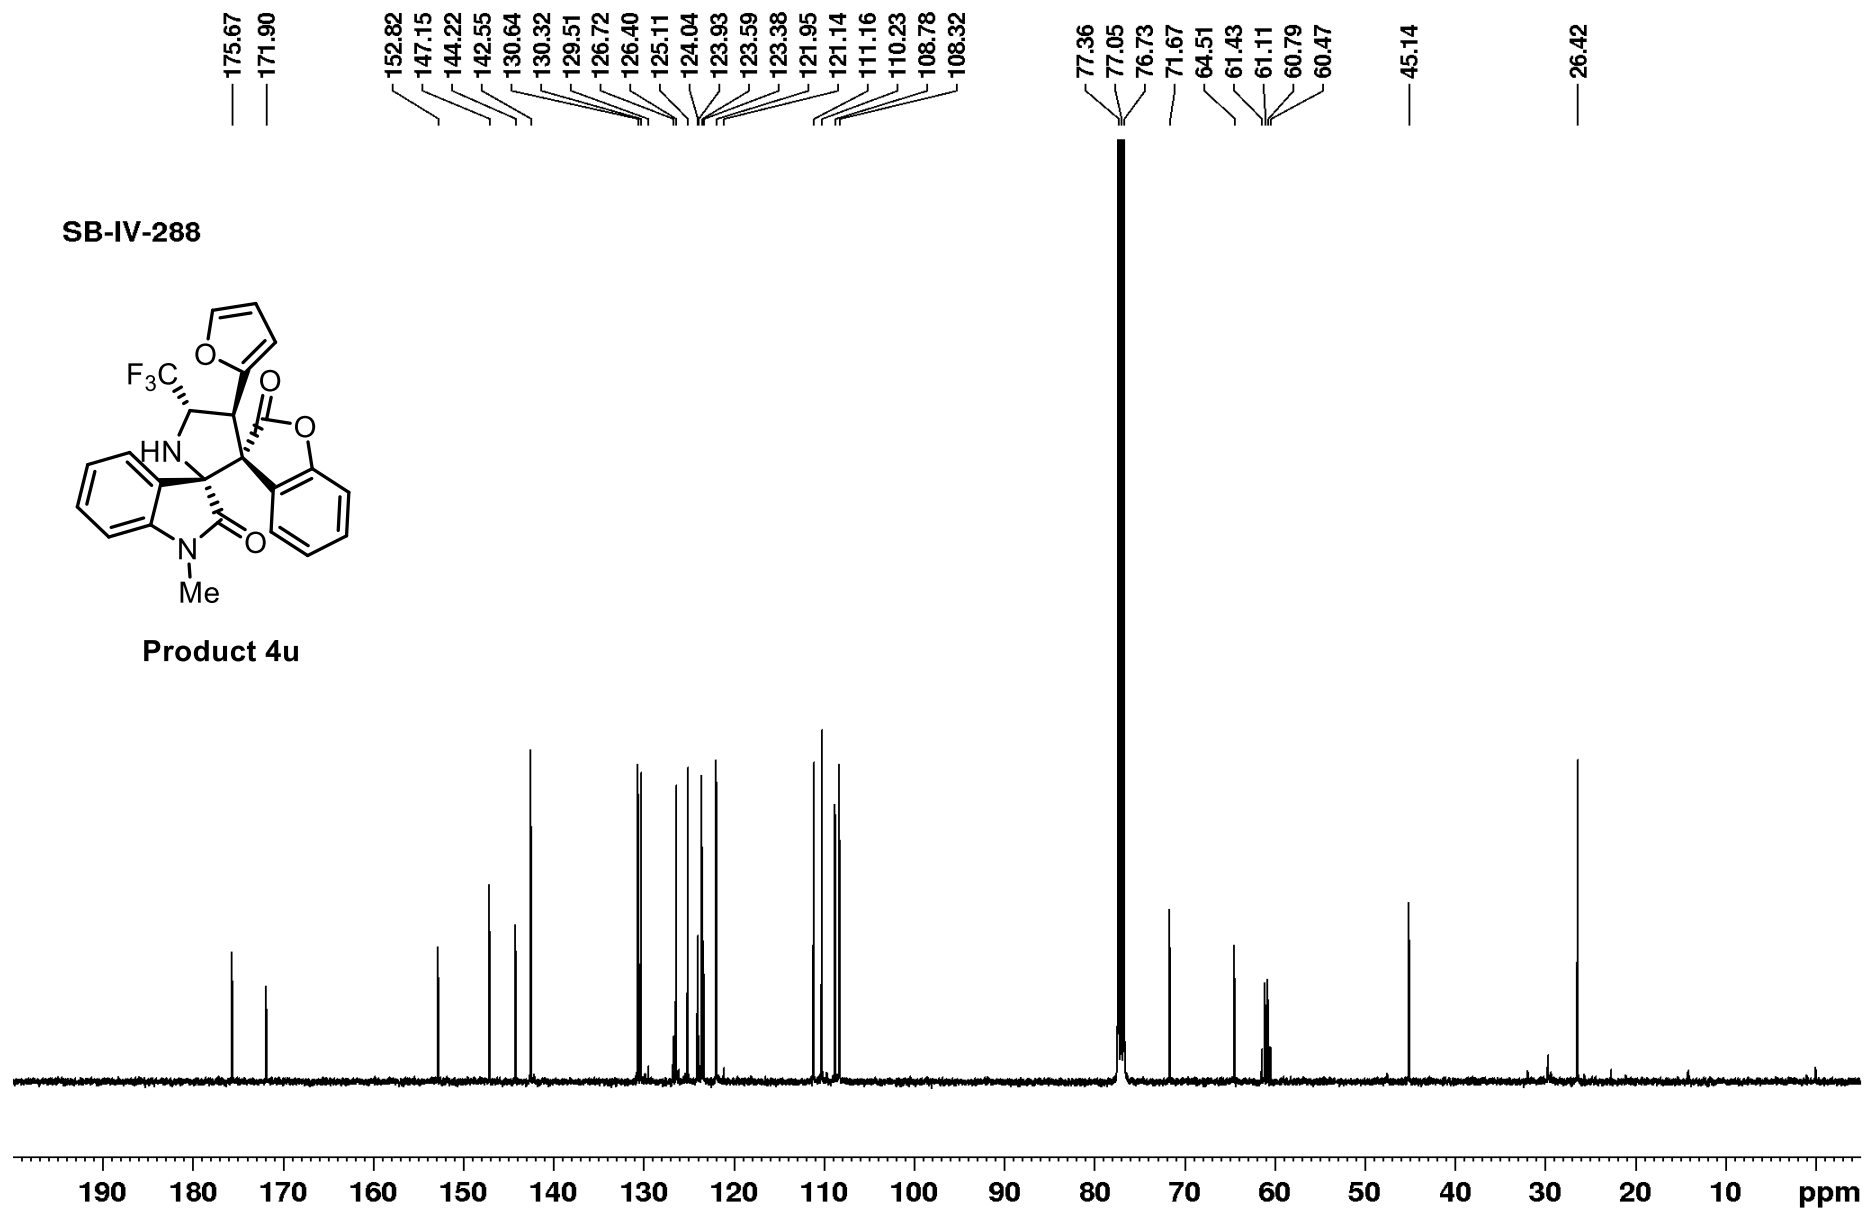

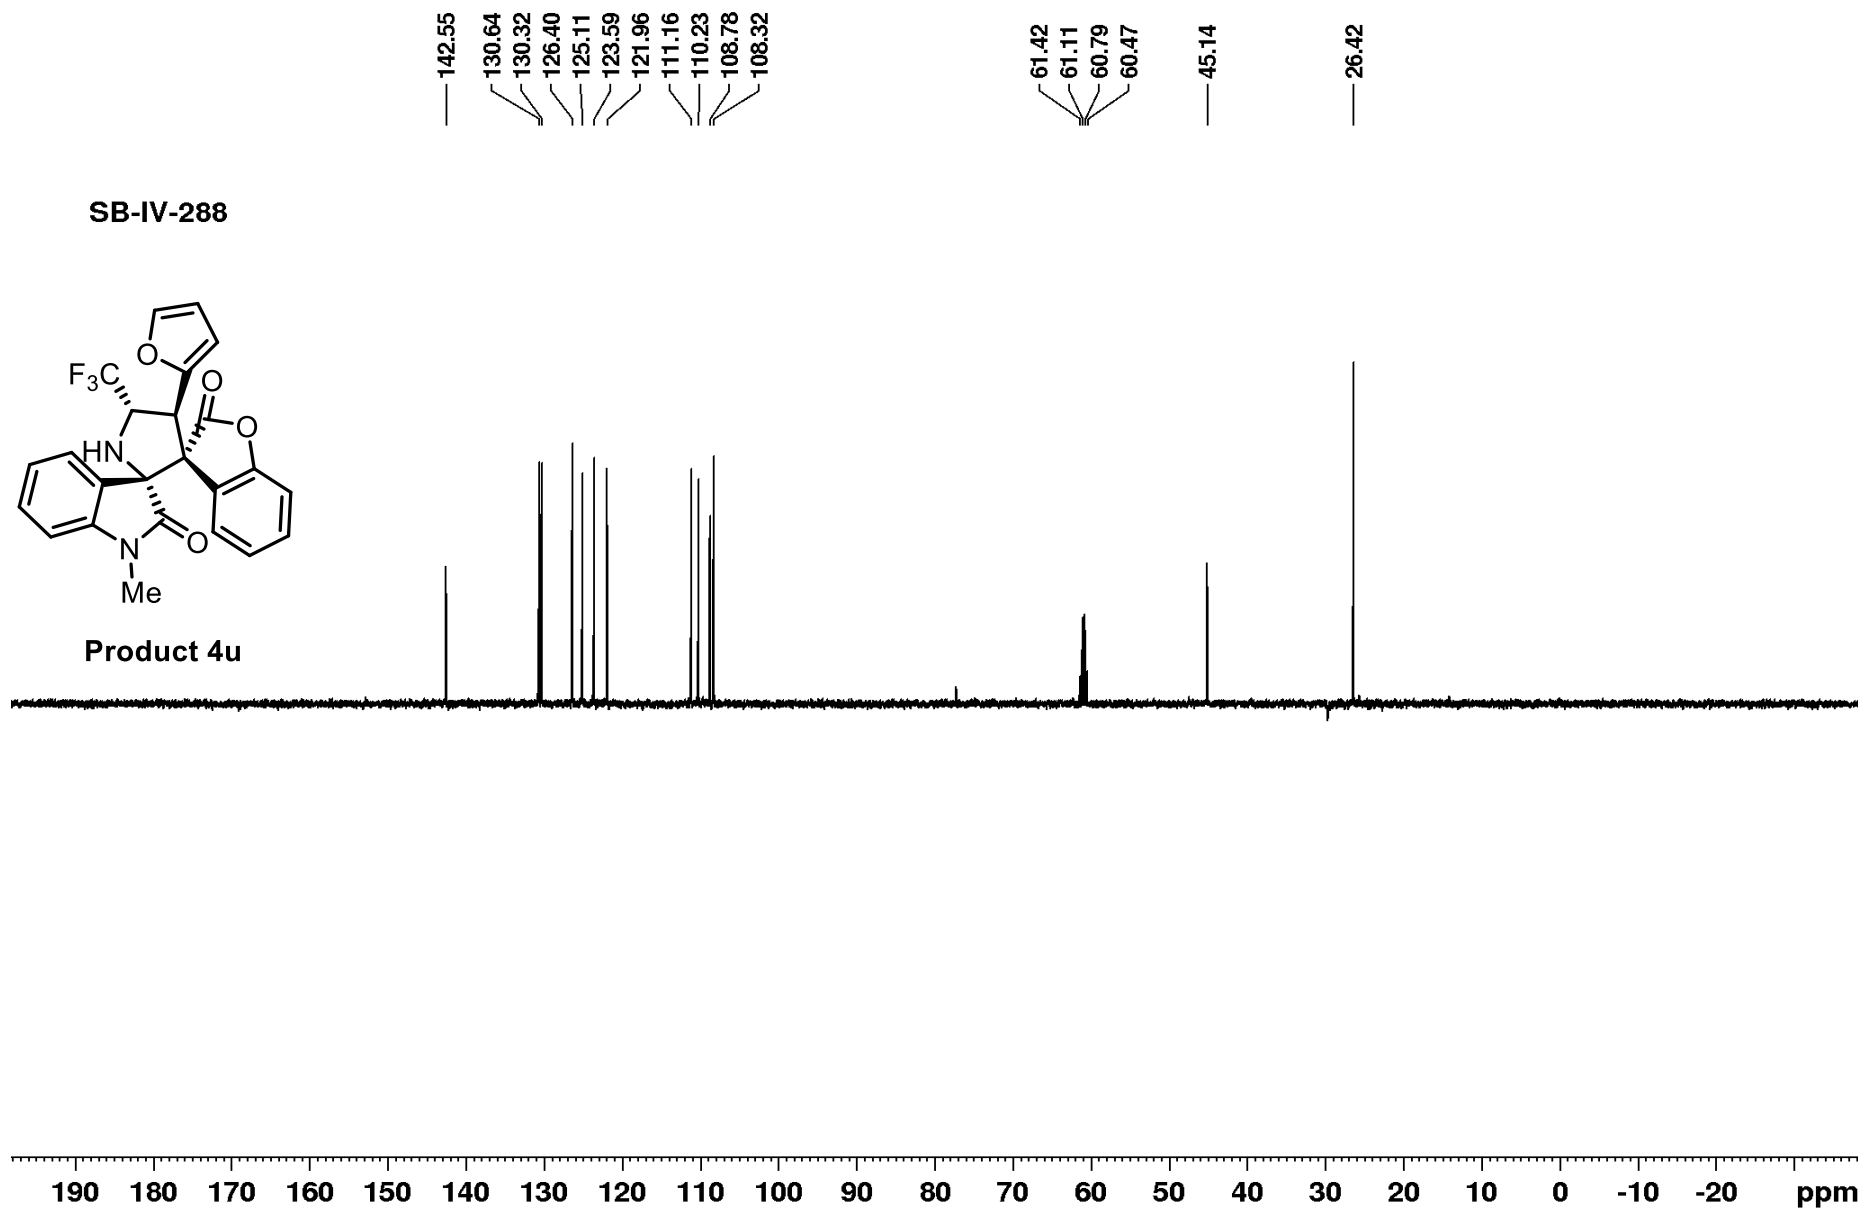

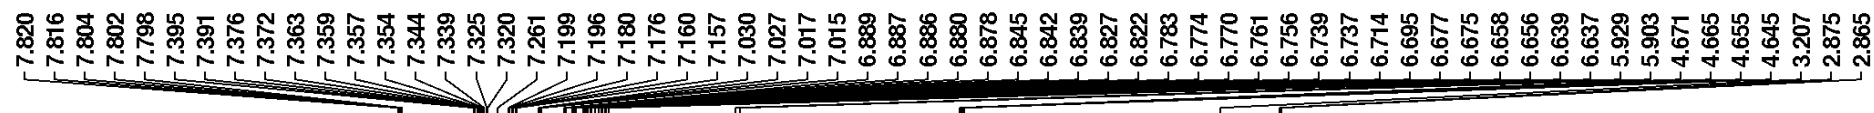

SB-IV-290

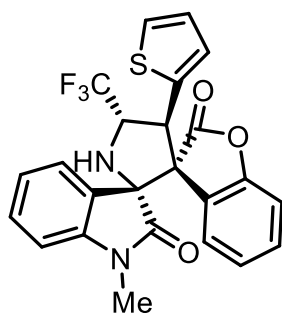

Product 4v

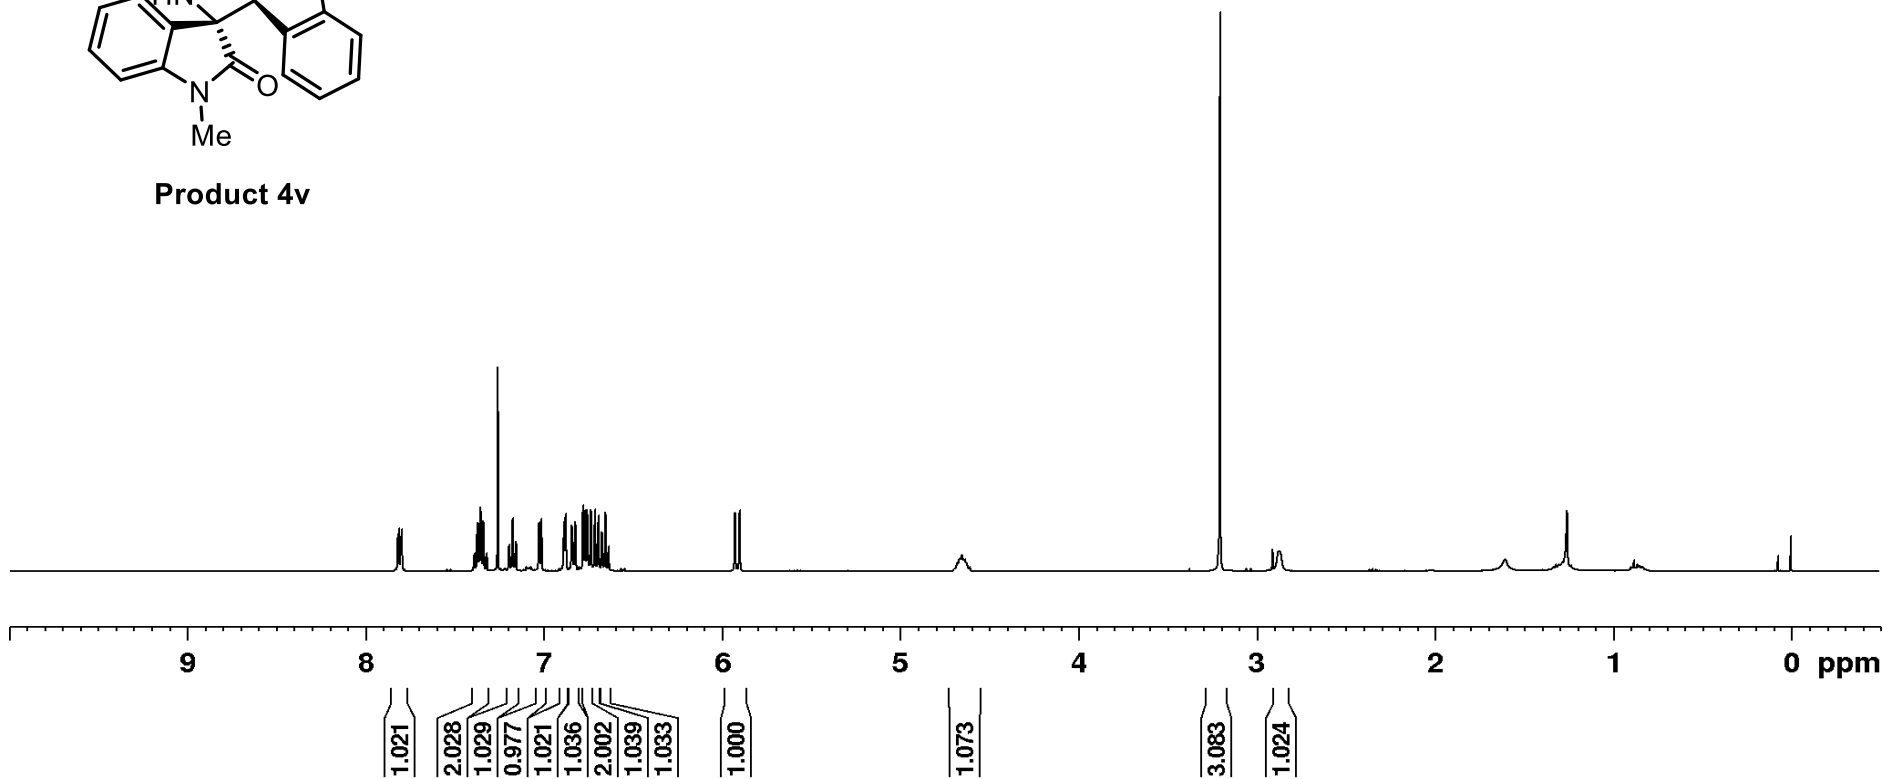



SB-IV-290

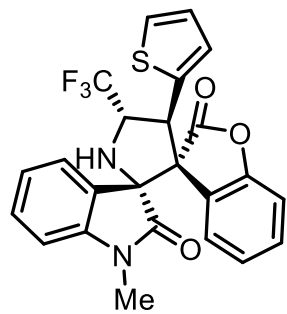

Product 4v

—71.44

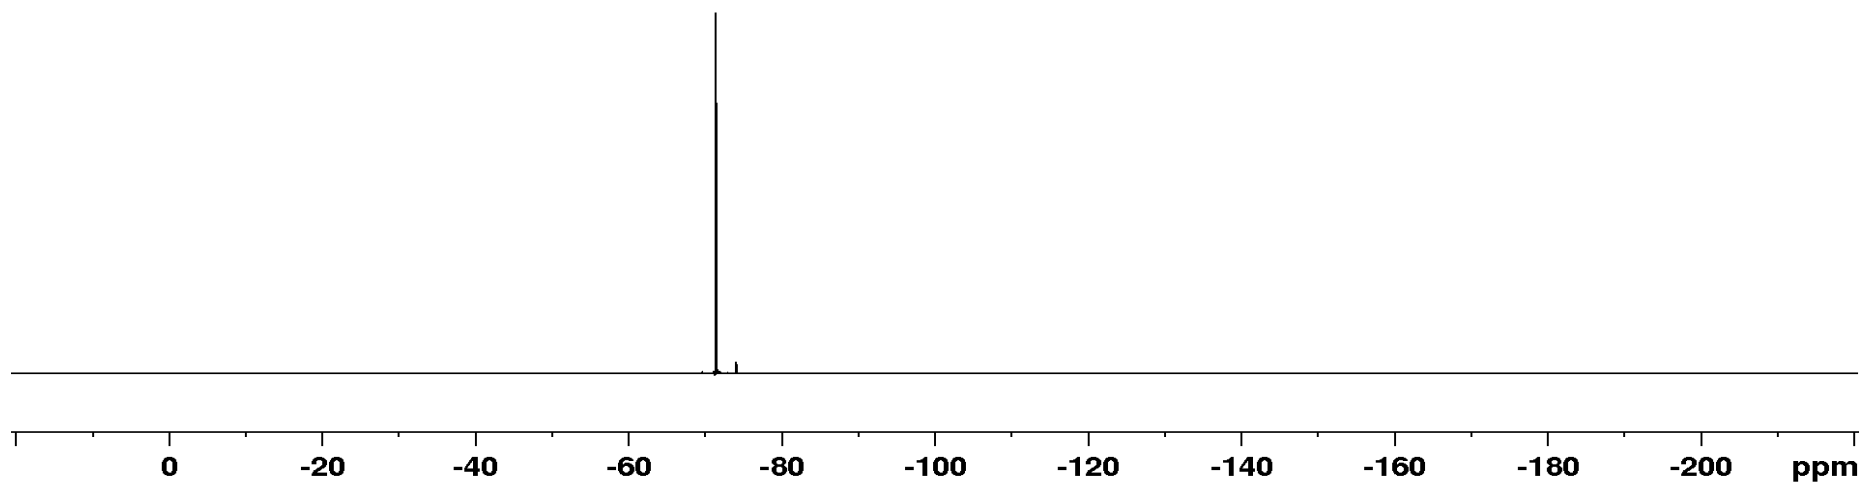

S109

SB-IV-290

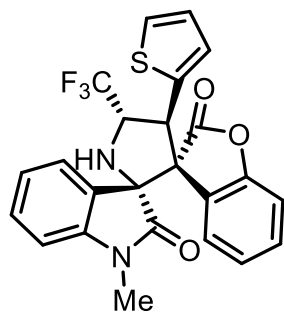

Product 4v

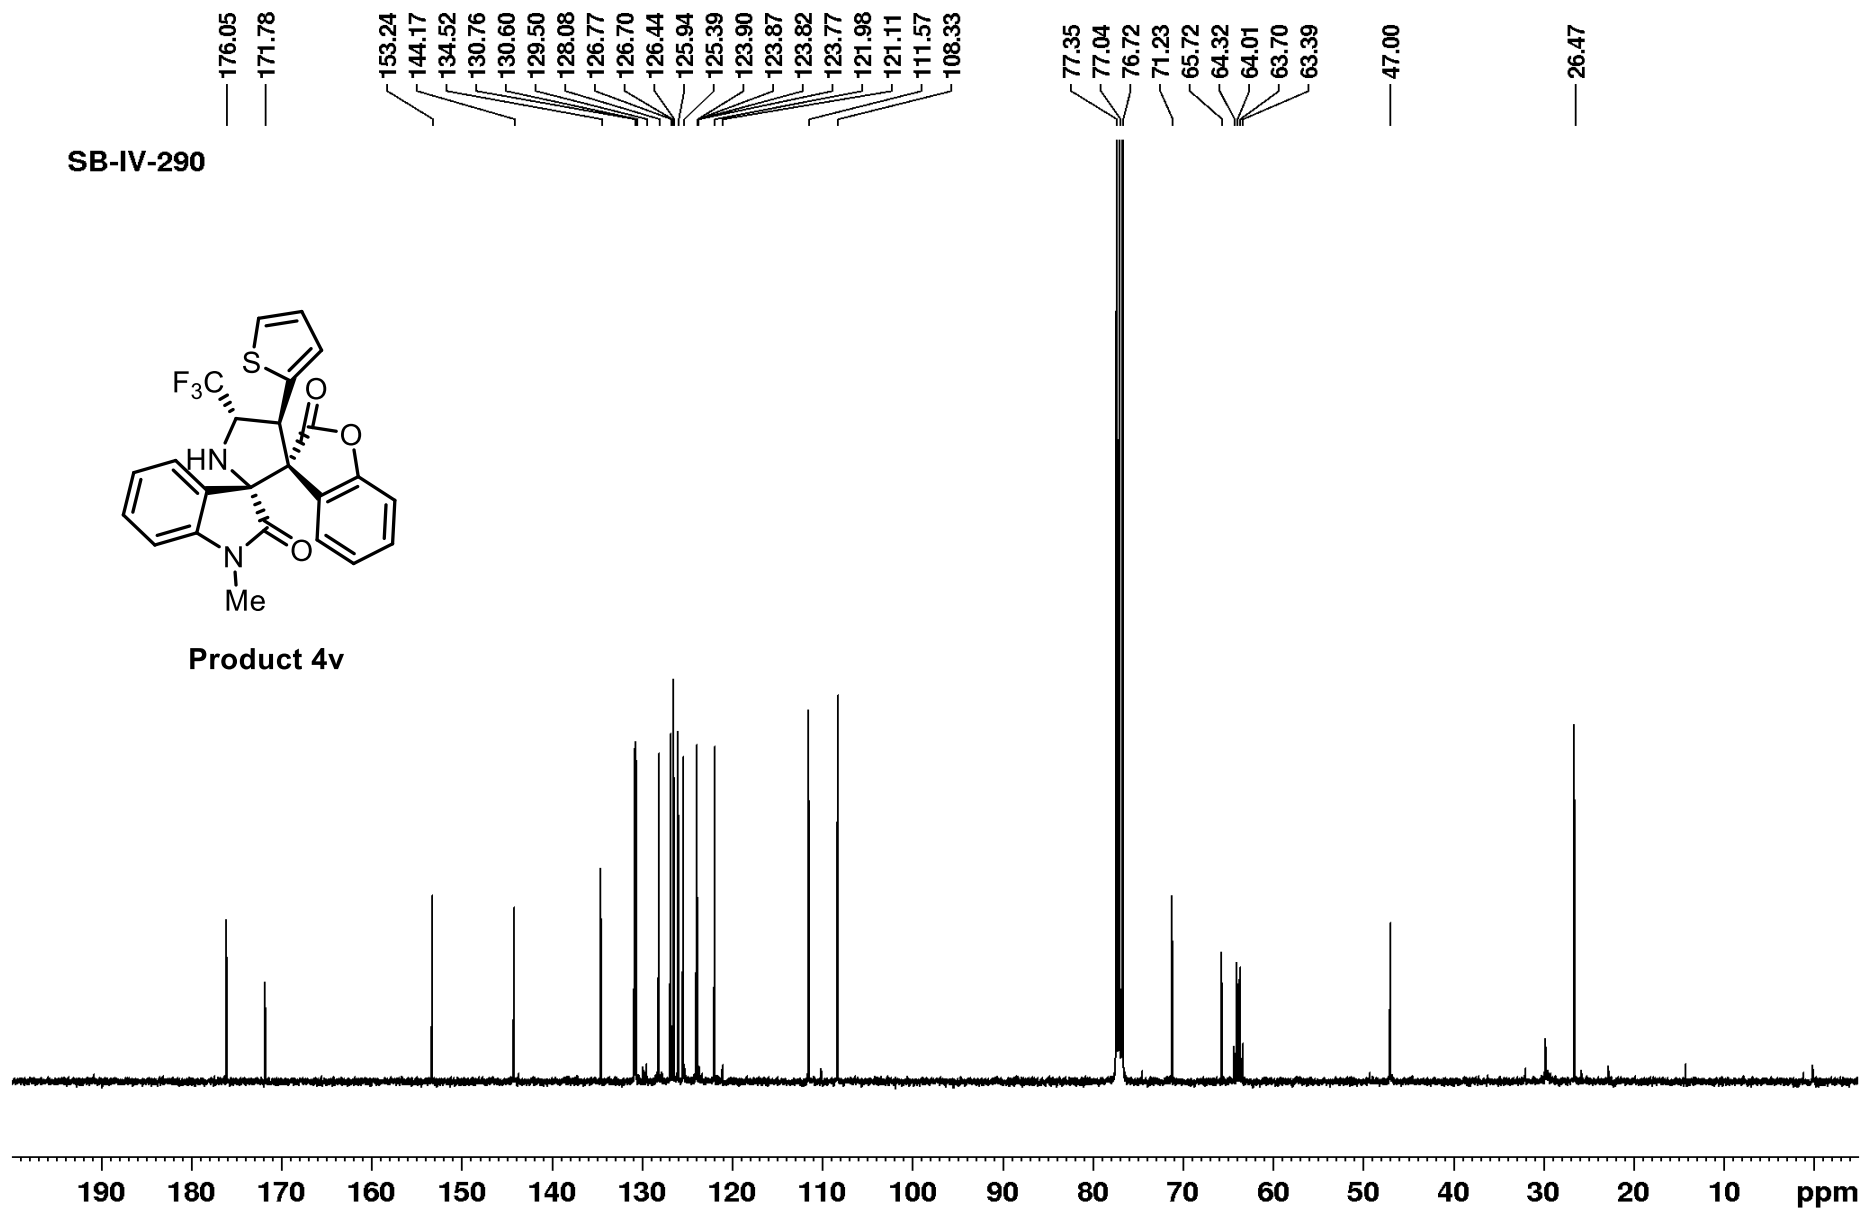

SB-IV-290

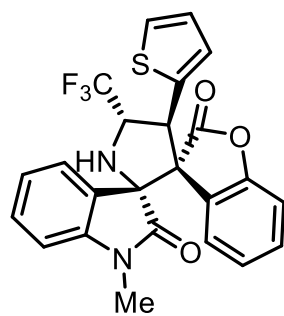

Product 4v

130.76  
130.60  
128.08  
126.77  
126.45  
125.94  
125.39  
123.87  
121.98  
111.57  
108.33

64.31  
64.01  
63.70  
63.39

46.99

26.47

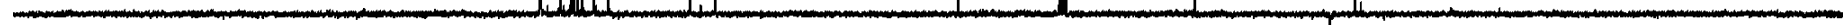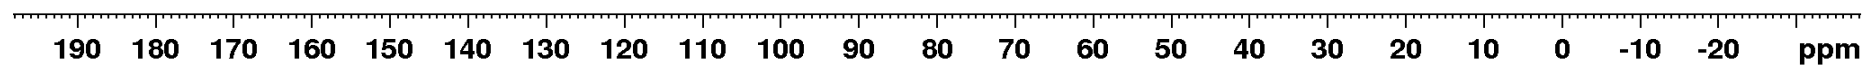

SB-IV-259

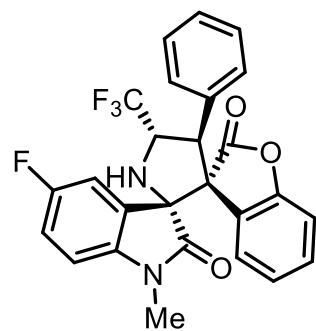

Product 4w

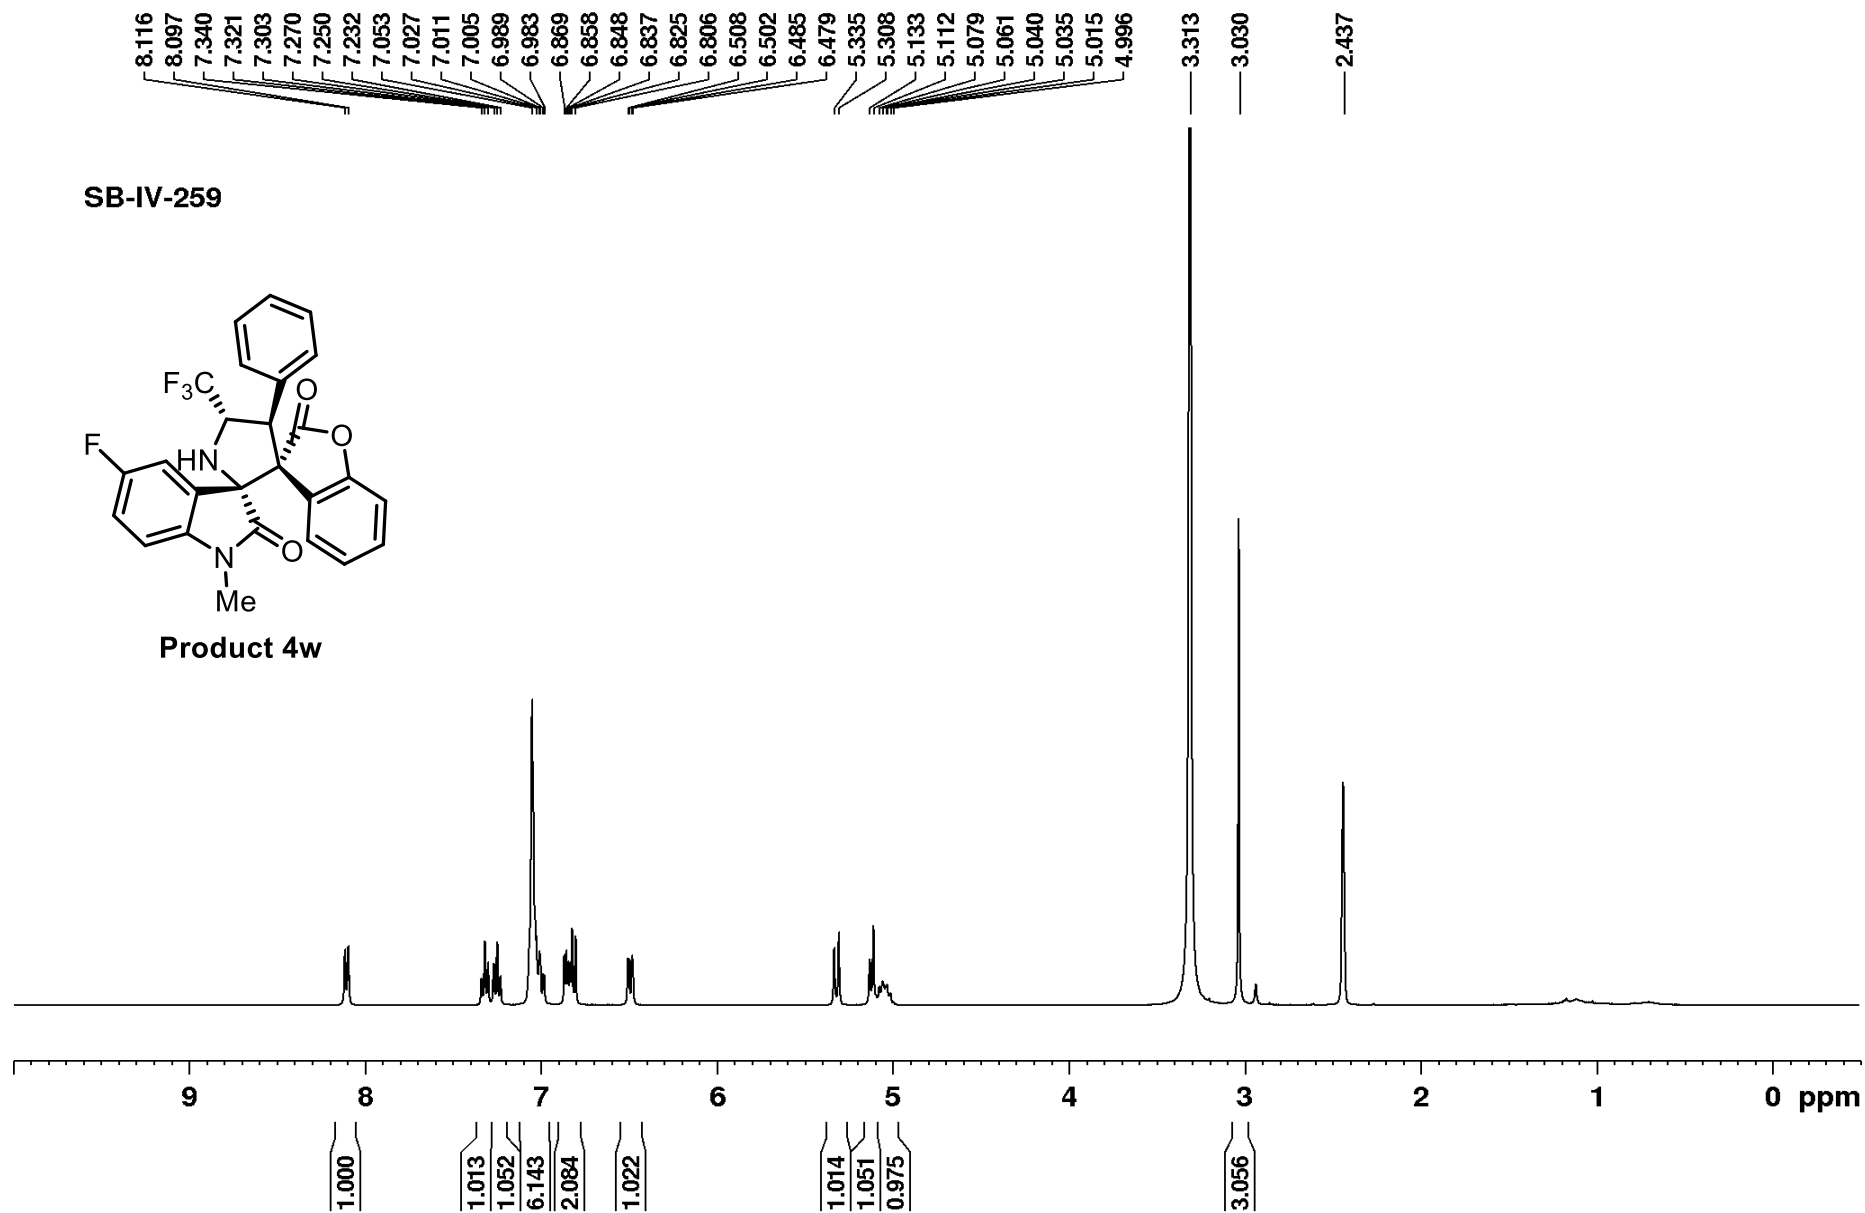

SB-IV-259

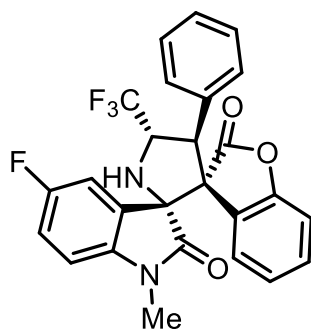

Product 4w

— -70.54

— -121.54

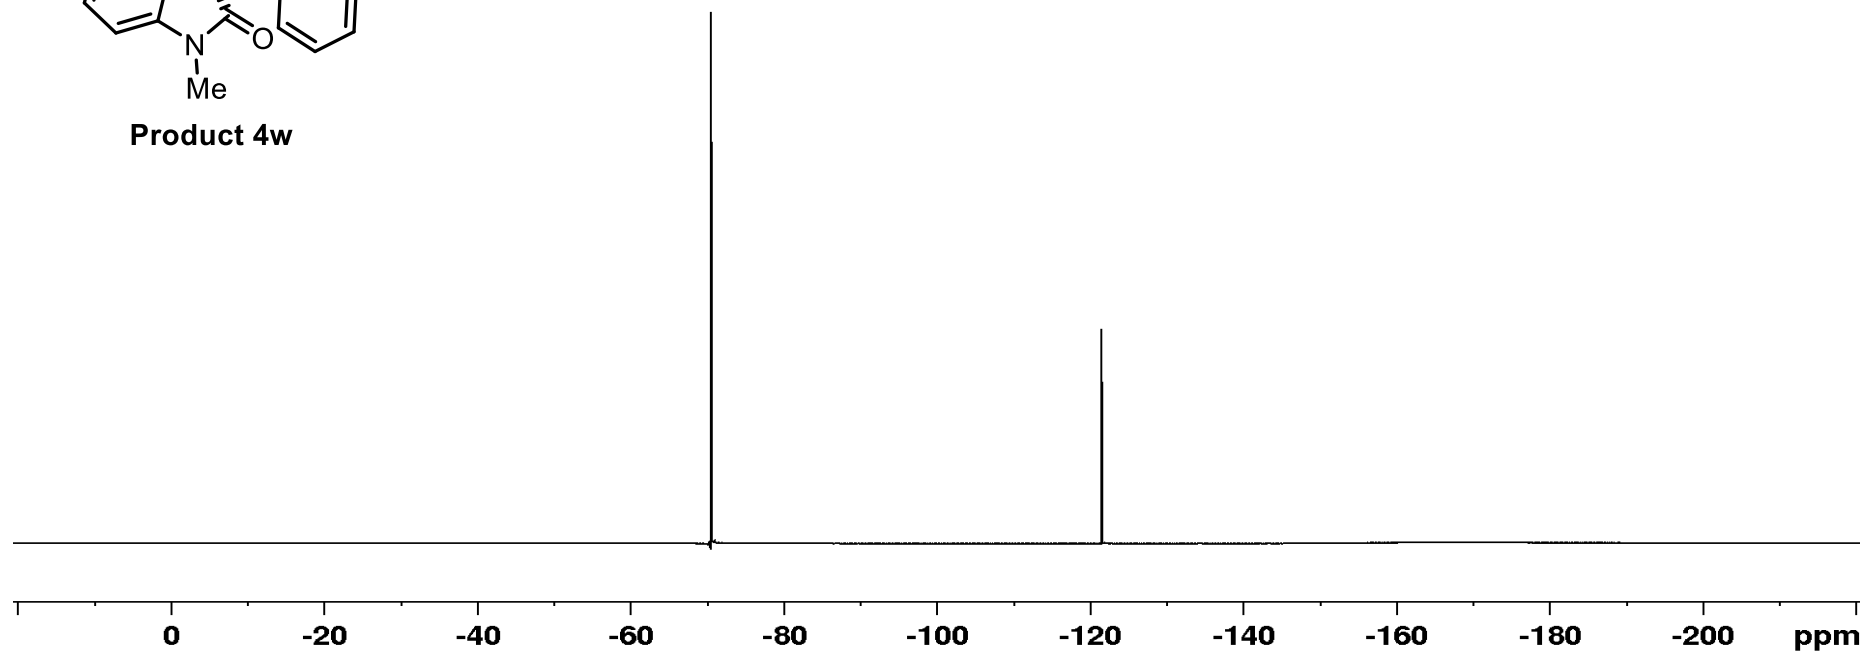

S113

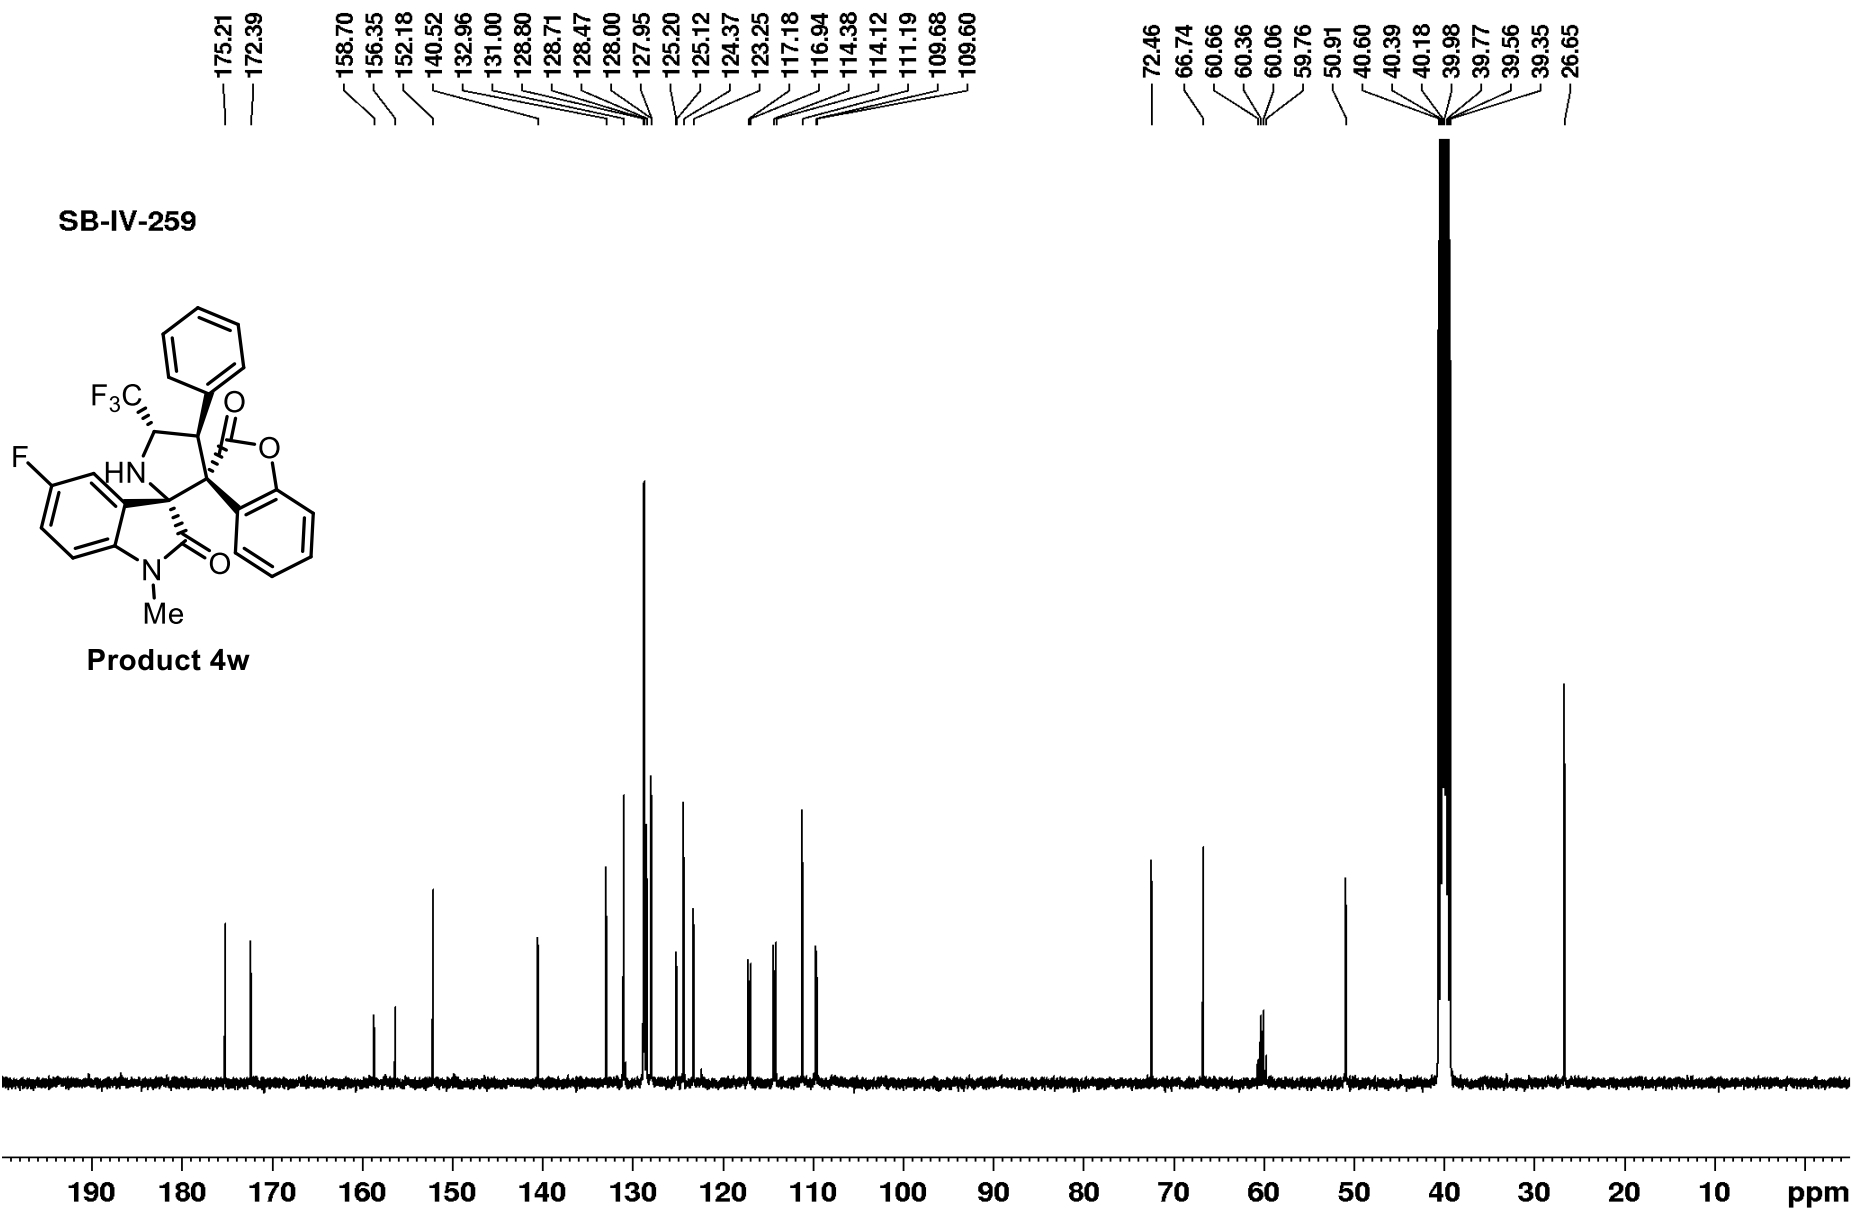

SB-IV-259

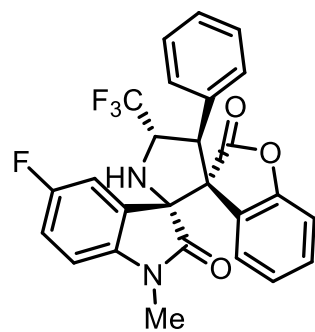

Product 4w

131.01  
128.80  
128.71  
128.47  
127.95  
124.37  
117.18  
116.95  
114.38  
114.12  
111.20  
109.69  
109.61

60.65  
60.35  
60.05  
59.74  
50.91  
40.64  
40.43  
40.22  
40.01  
39.81  
26.65

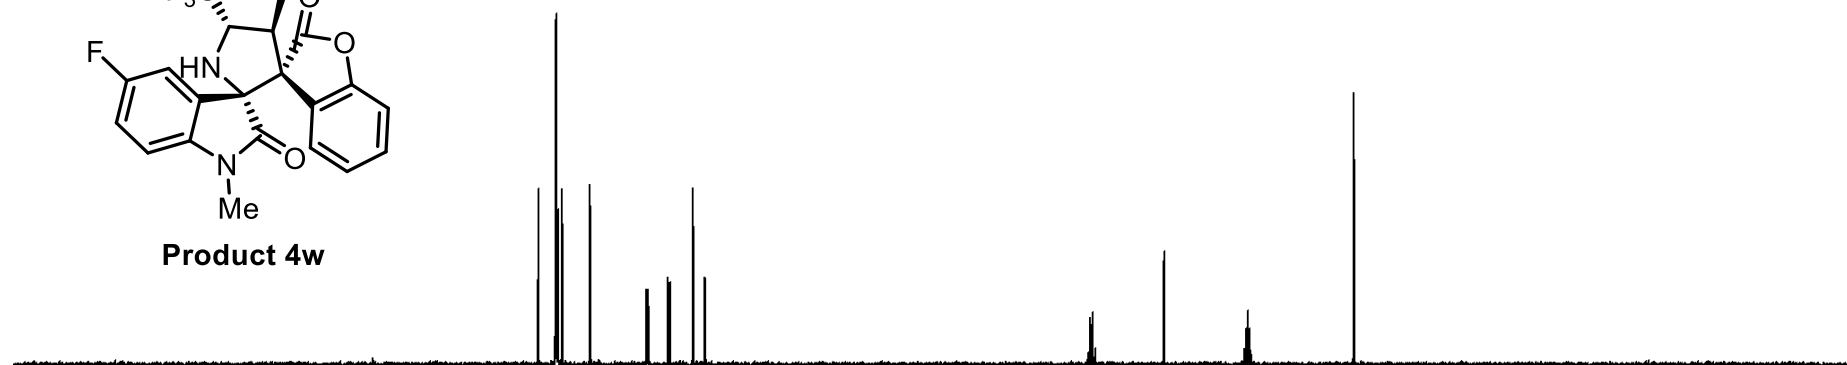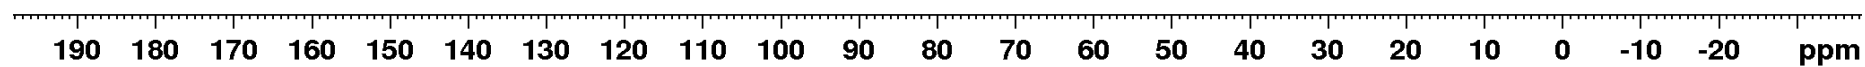

7.312  
7.295  
7.262  
7.248  
7.245  
7.229  
7.226  
7.117  
7.102  
7.097  
7.083  
7.068  
7.062  
7.043  
6.929  
6.921  
6.913  
6.905  
6.901  
6.896  
6.882  
6.877  
6.741  
6.722  
6.608  
6.597  
6.594  
6.590  
6.582  
6.571  
6.563  
6.552  
5.585  
5.558  
4.941  
4.924  
4.911  
4.908  
4.895  
4.884  
4.881  
4.867  
4.851  
3.446  
3.439  
2.866  
2.853

1.590

-0.000

SB-IV-260

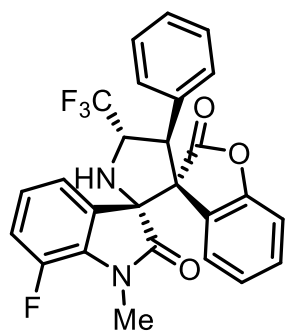

Product 4x

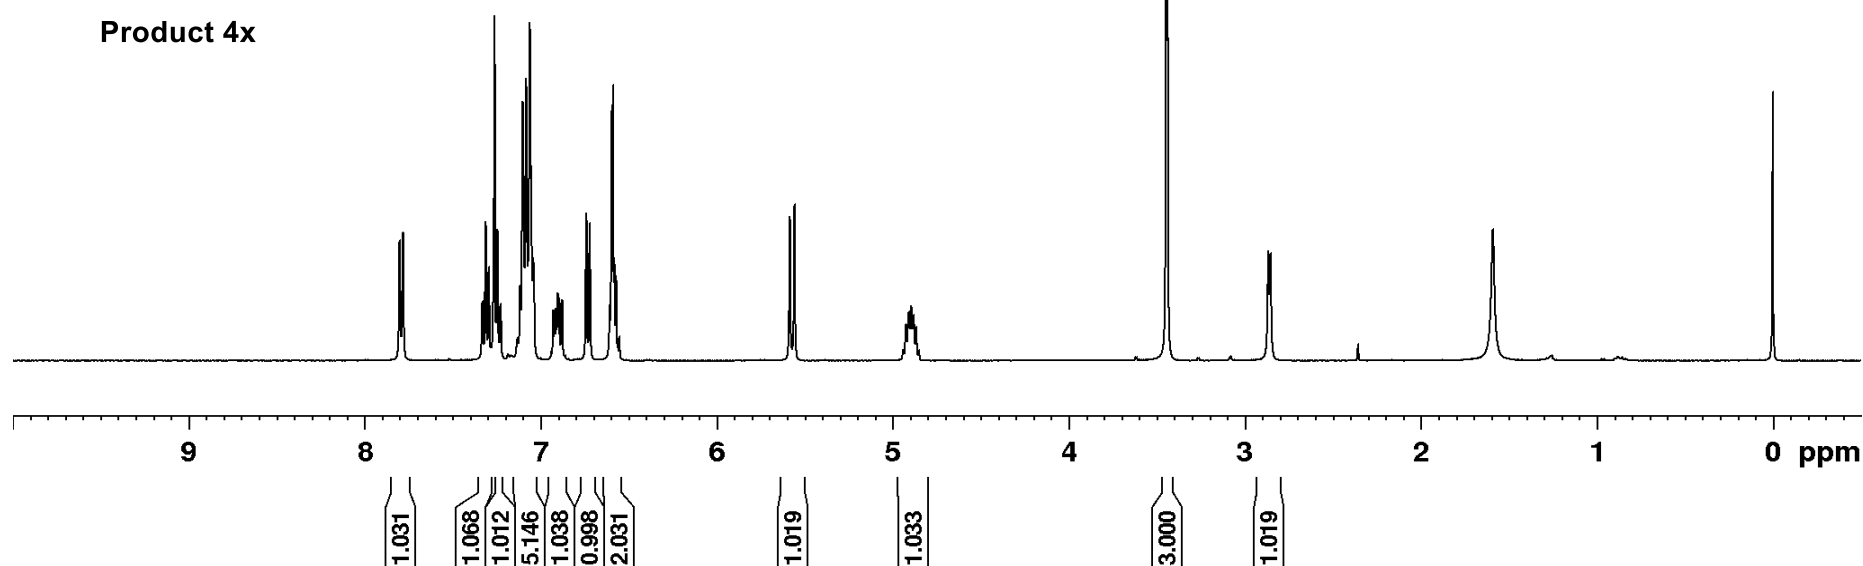

S116



**SB-IV-260**

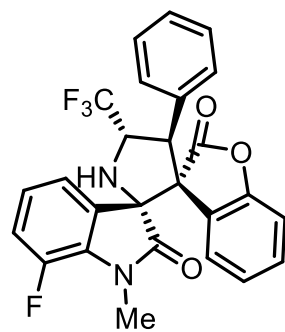

**Product 4x**

— -71.51

— -135.49

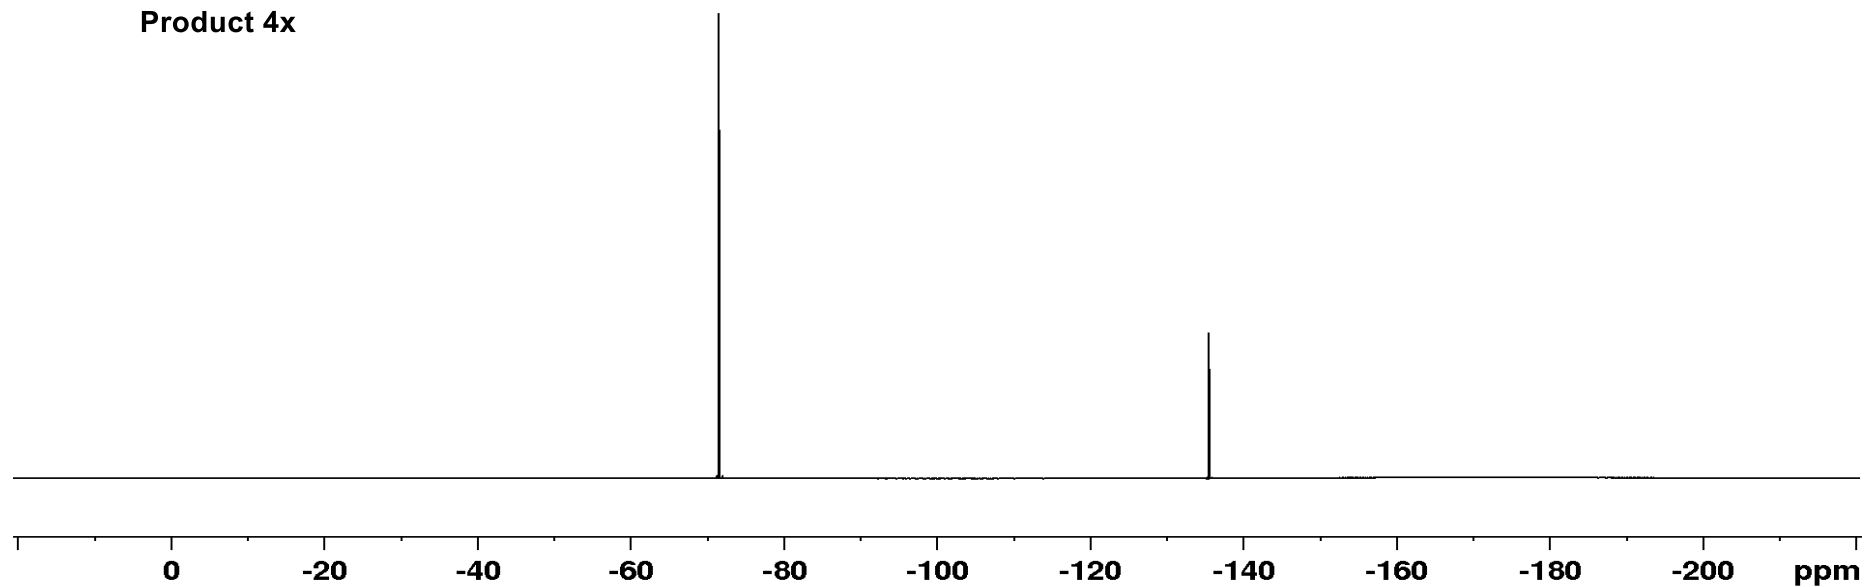

S117

SB-IV-260

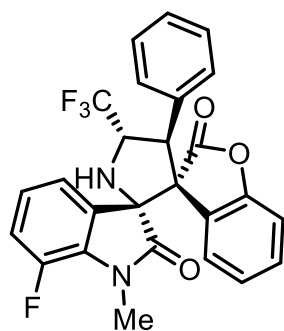

Product 4x

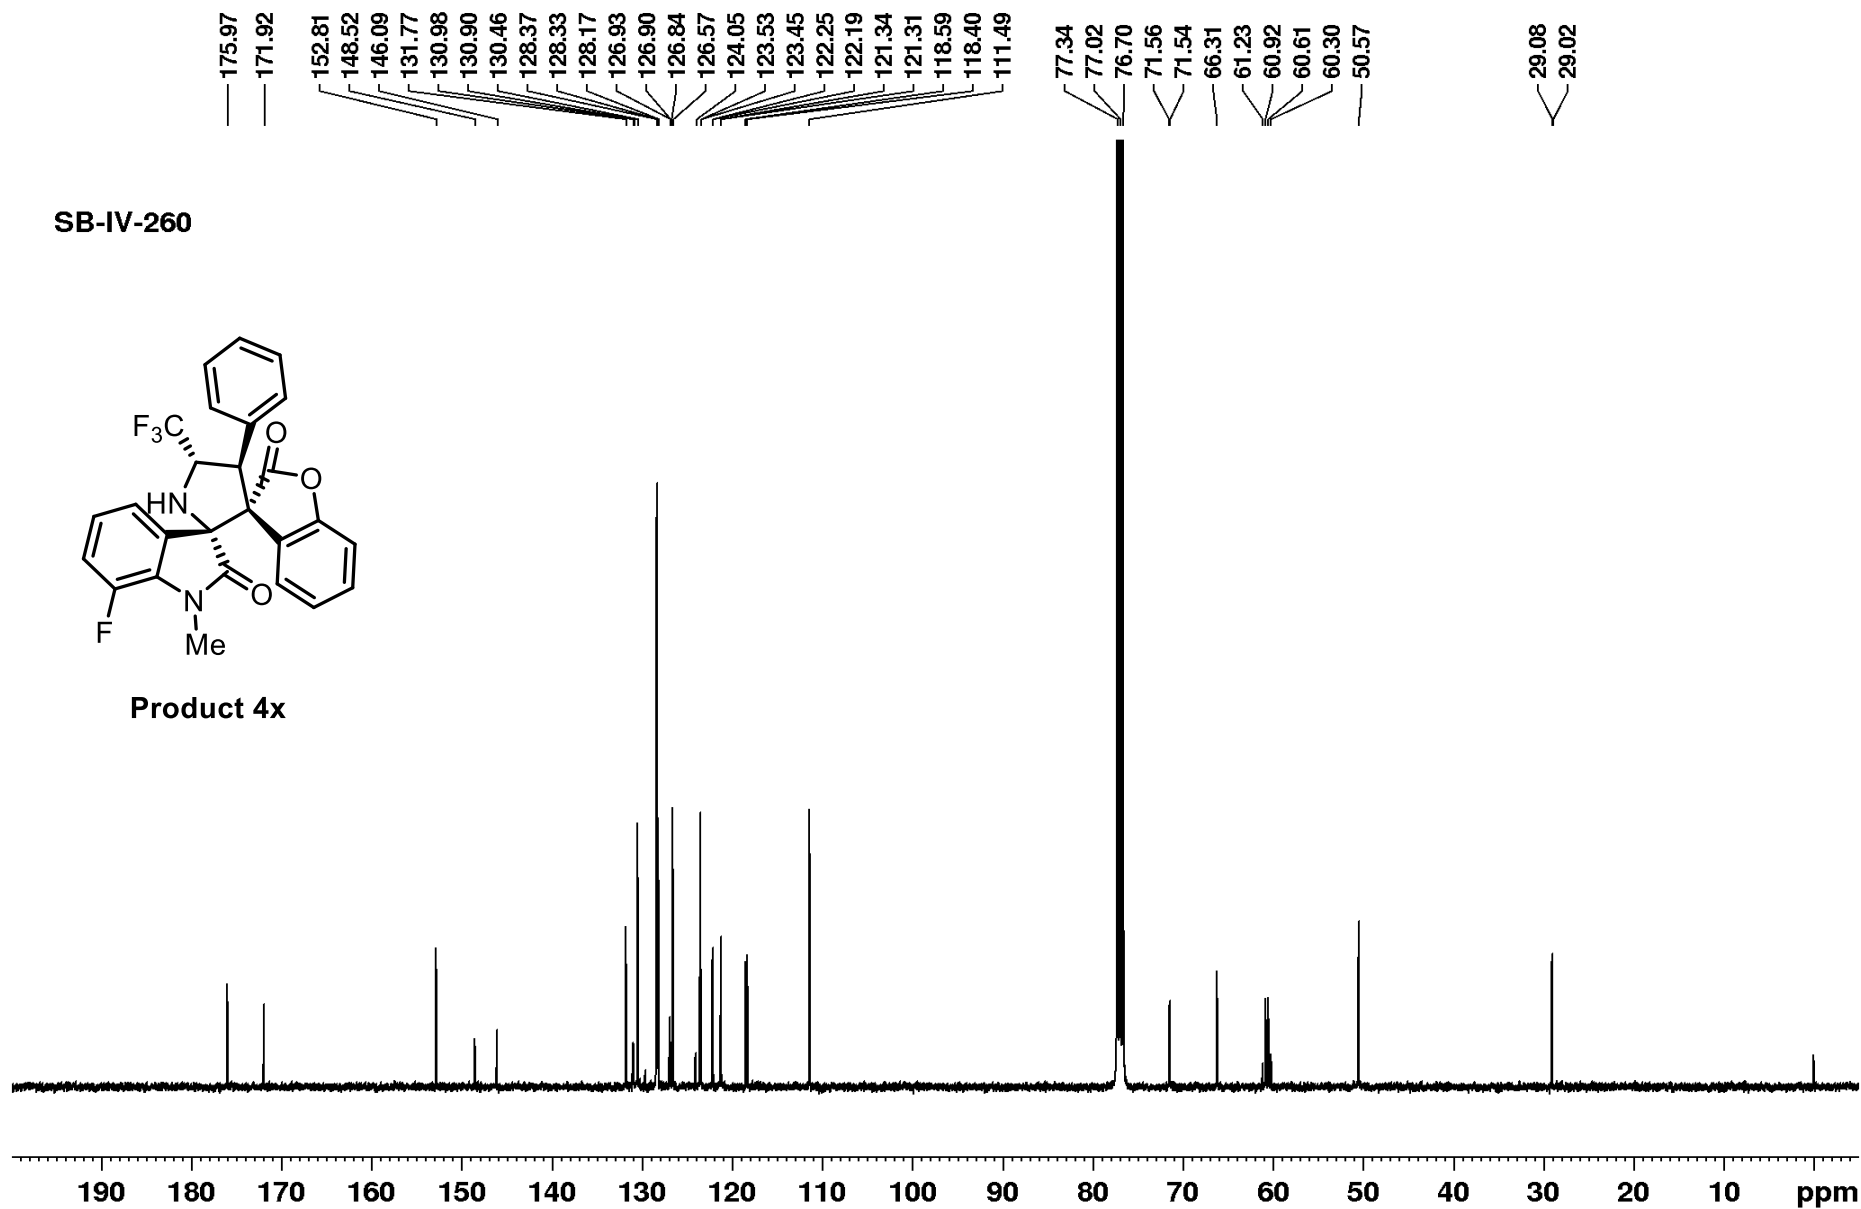

SB-IV-260

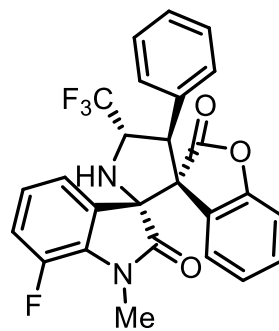

Product 4x

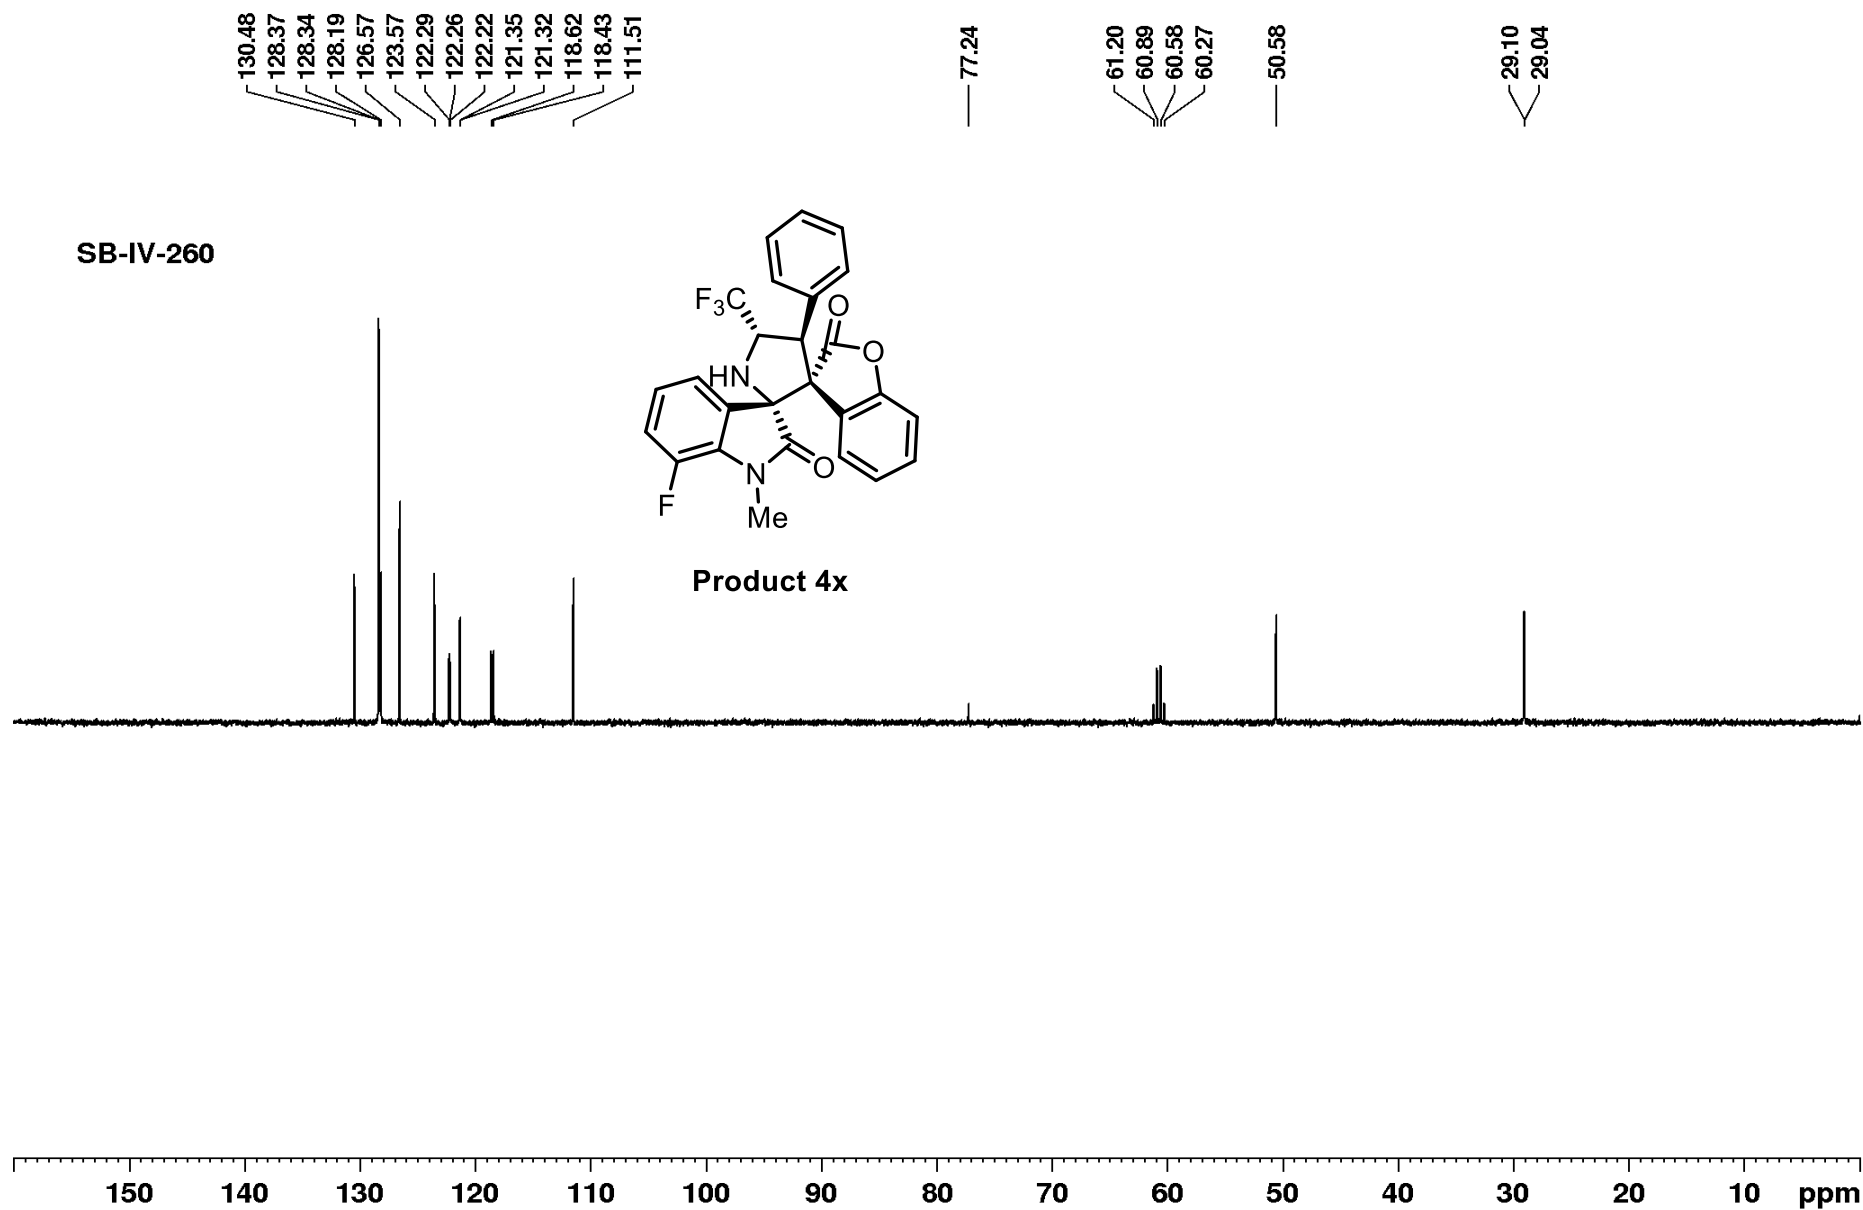

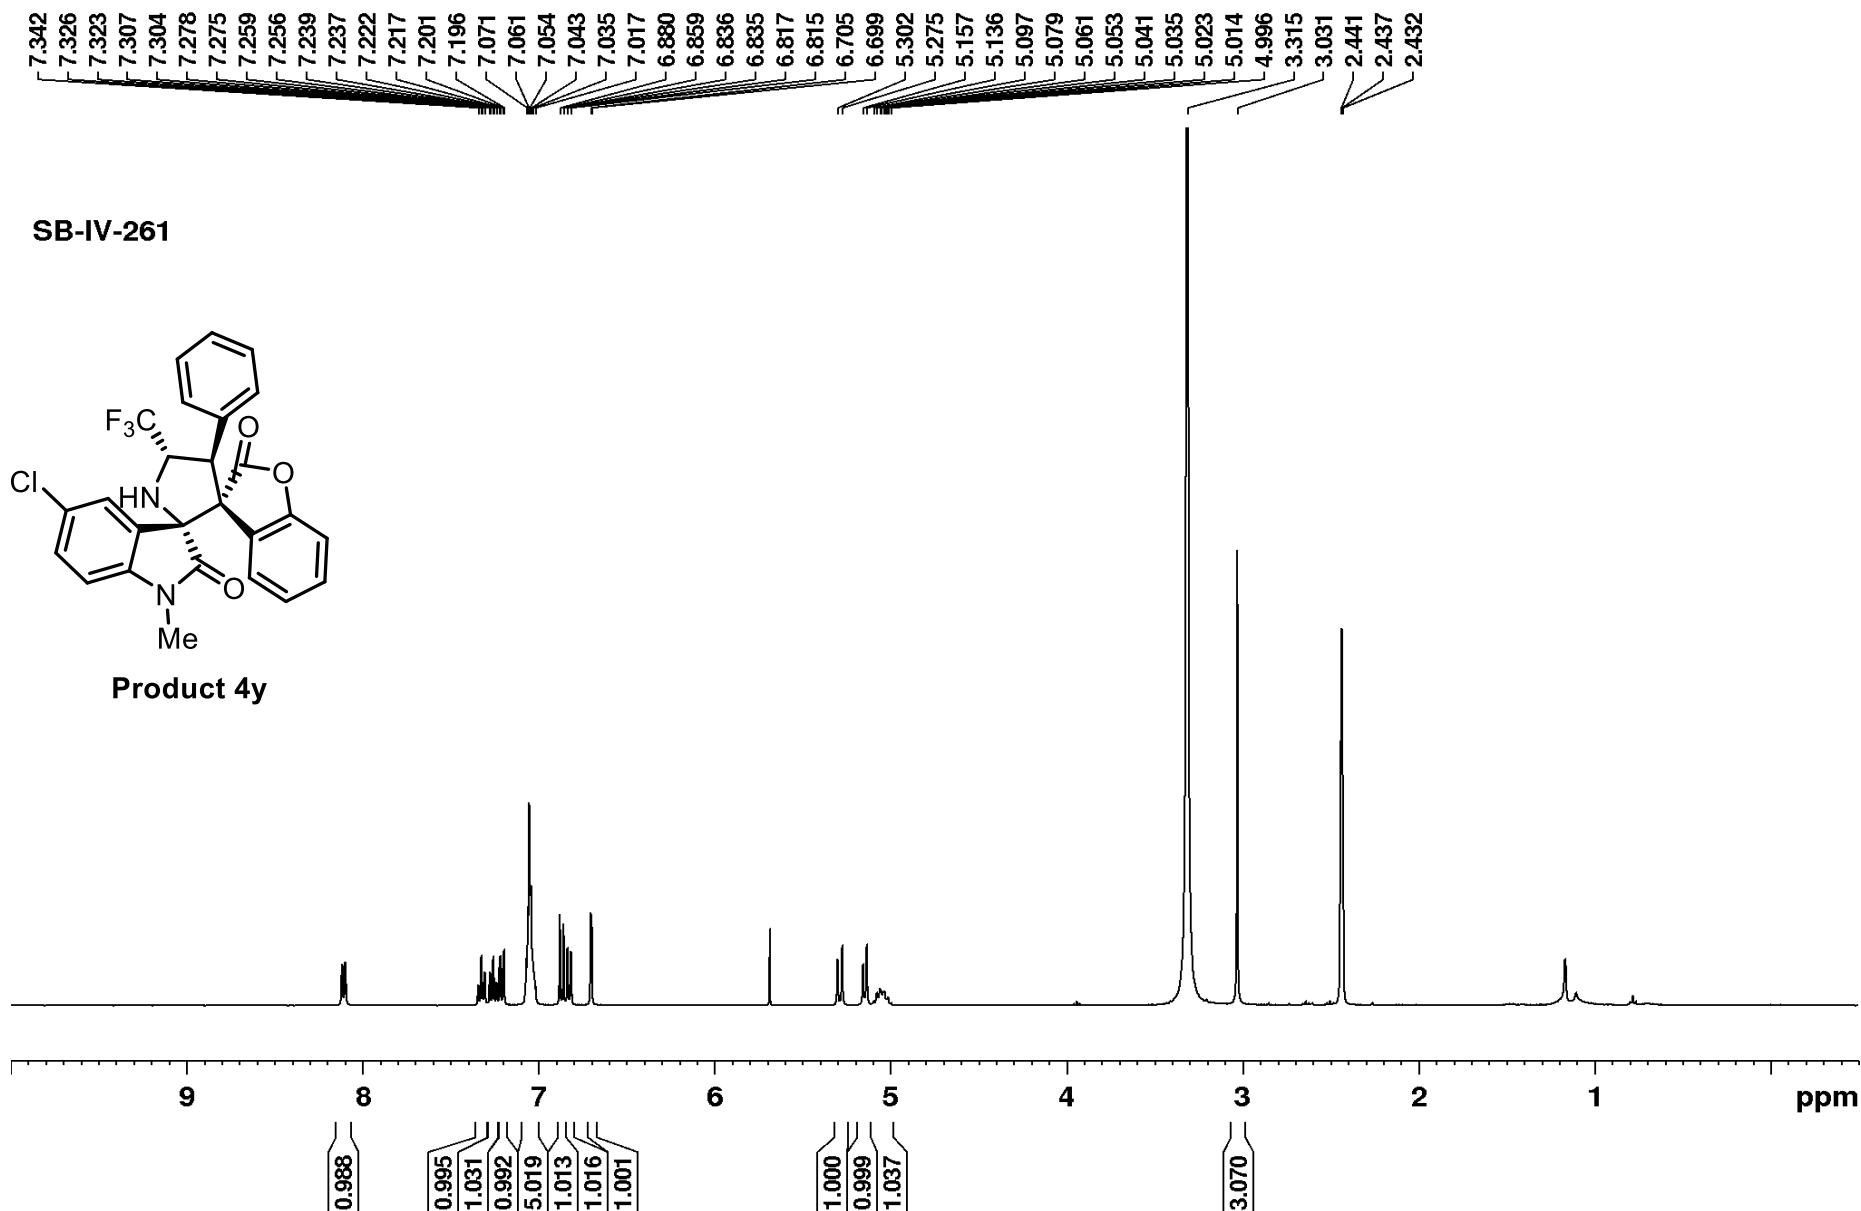

SB-IV-261

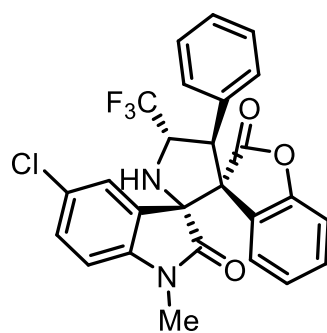

Product 4y

— -70.62

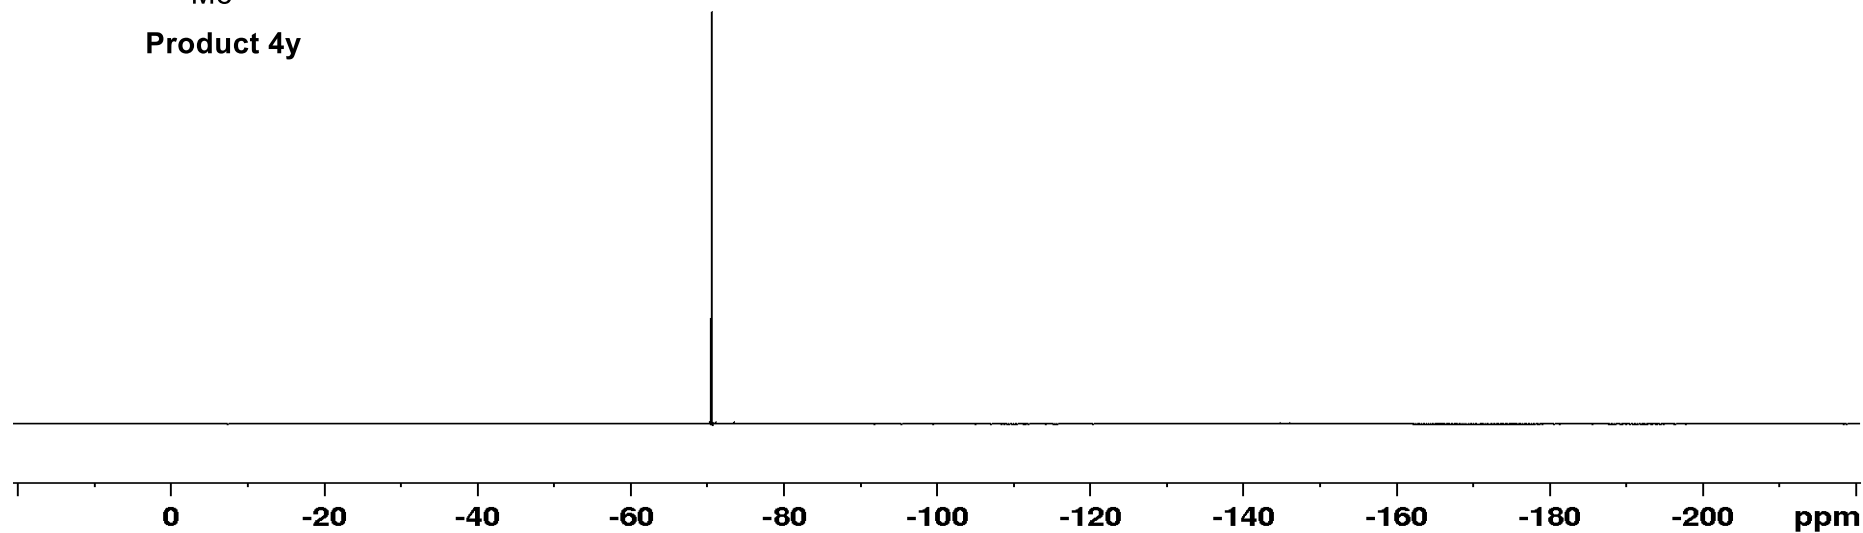

S121

SB-IV-261

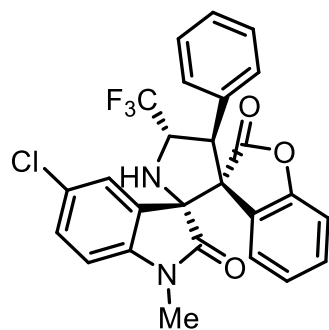

Product 4y

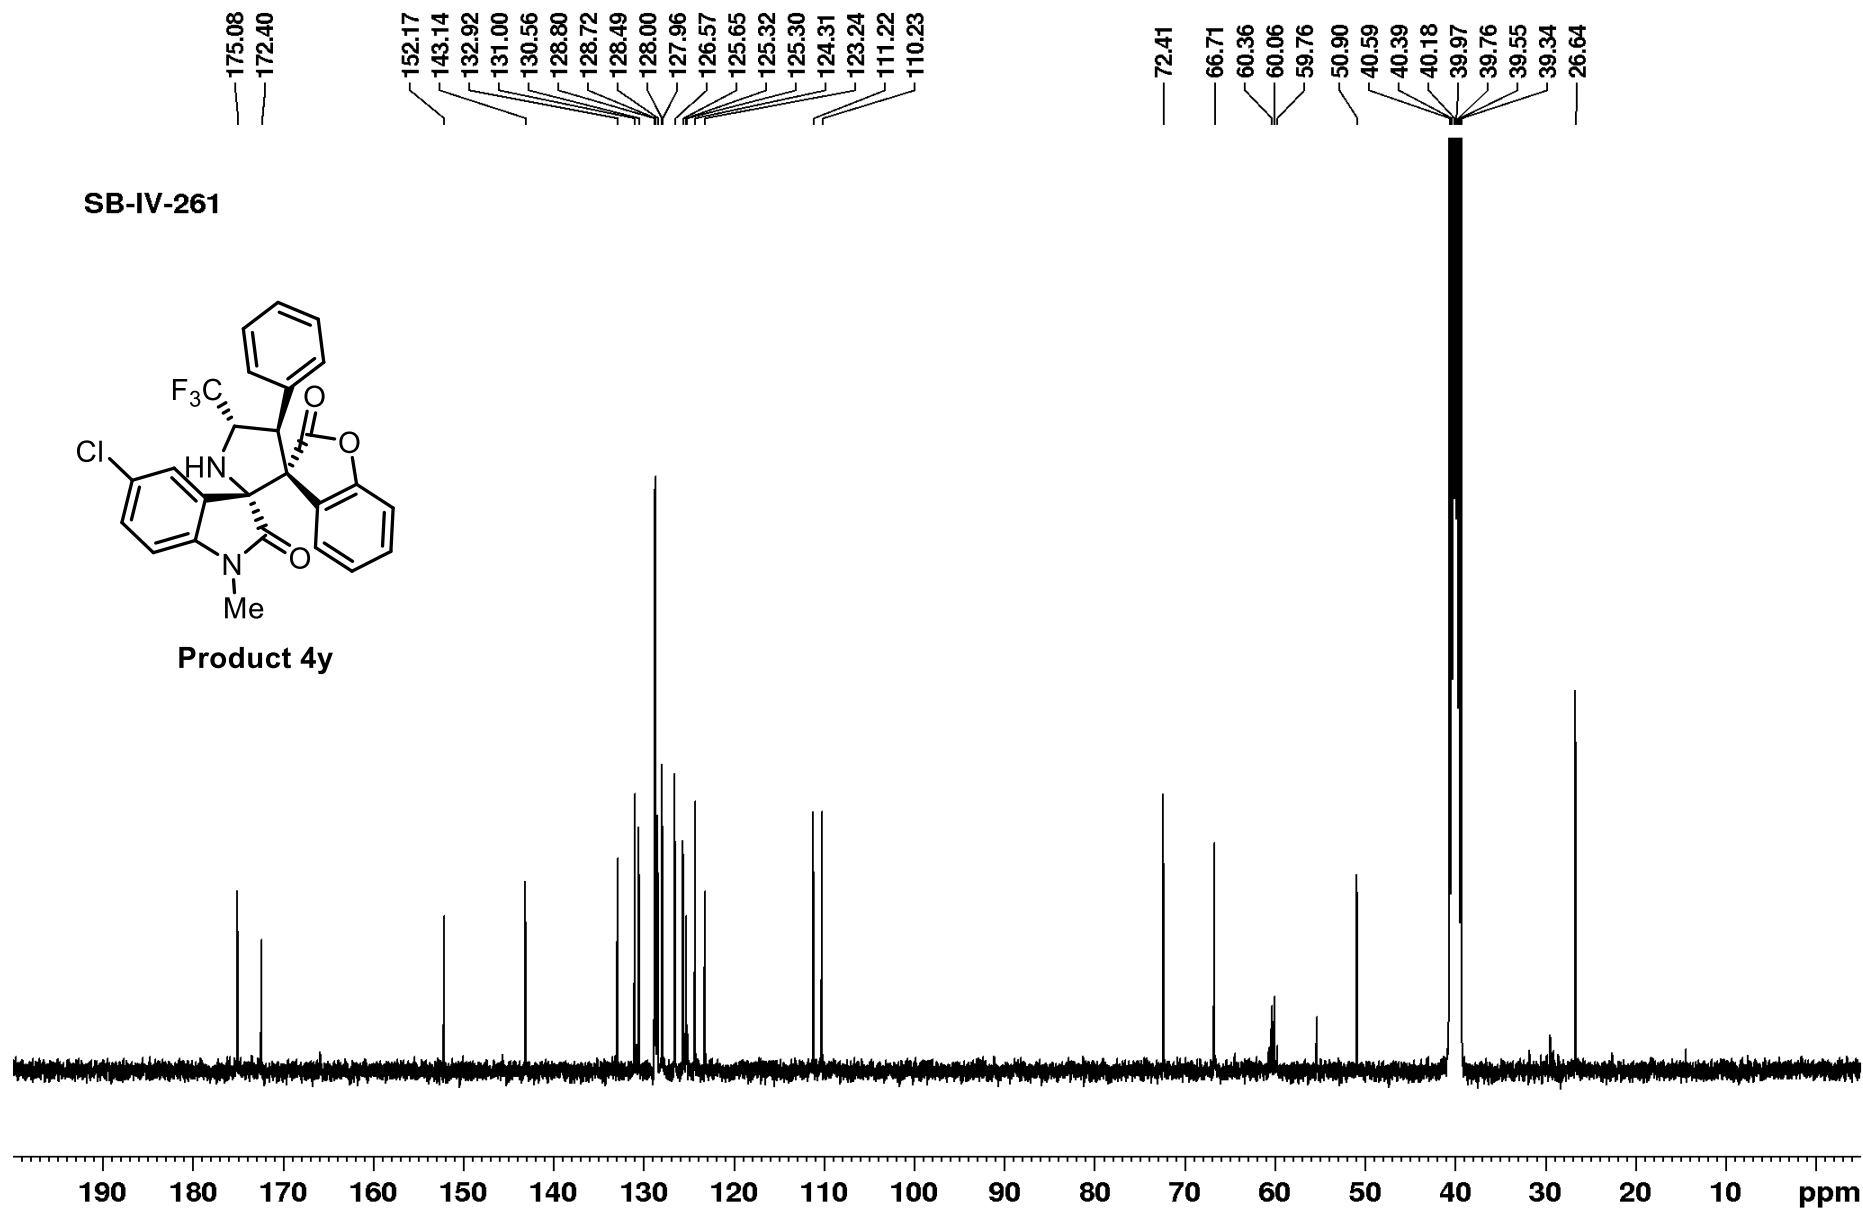

SB-IV-261

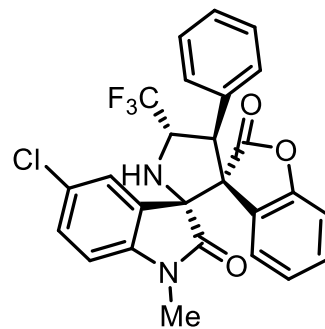

Product 4y

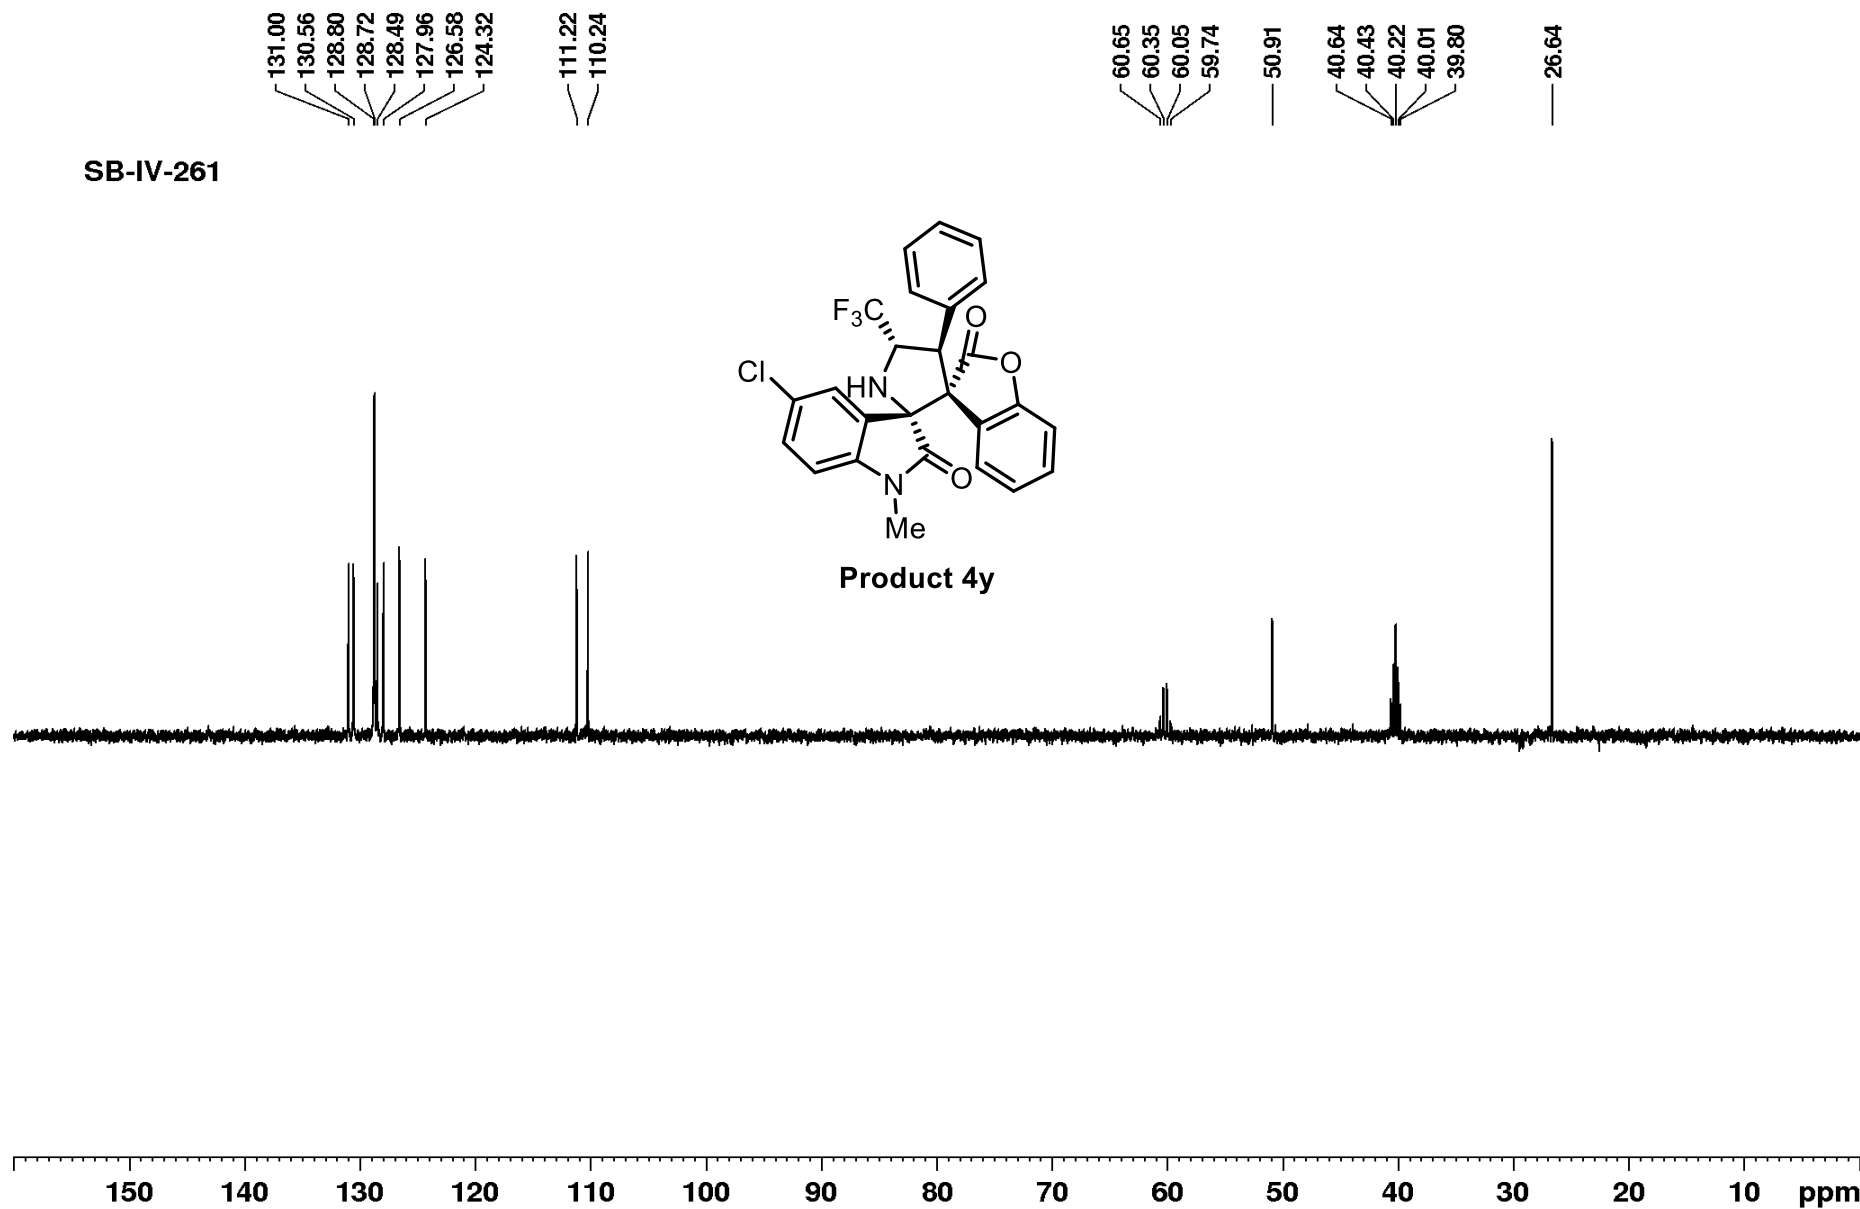

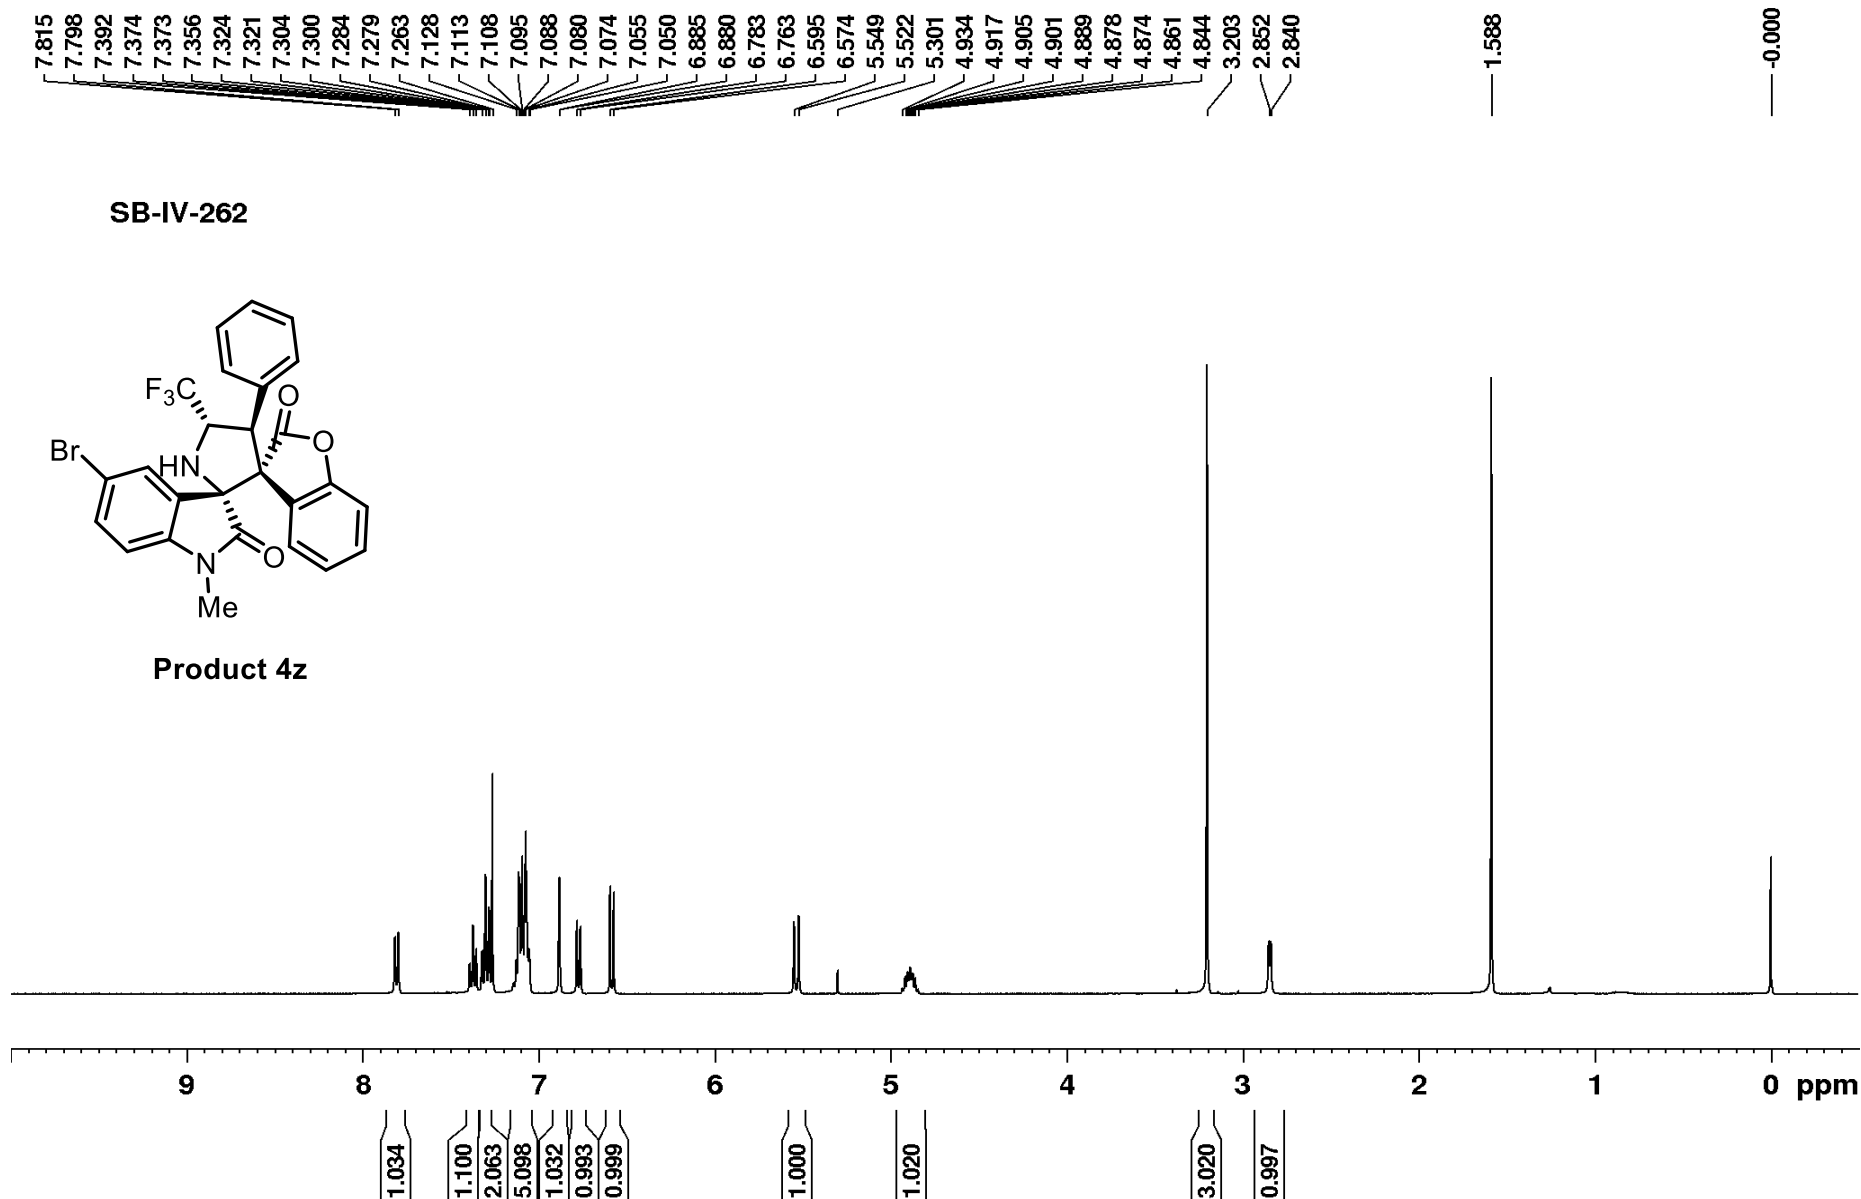



SB-IV-262

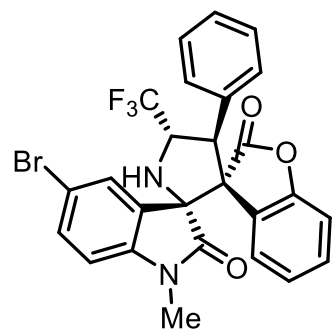

Product 4z

—71.61

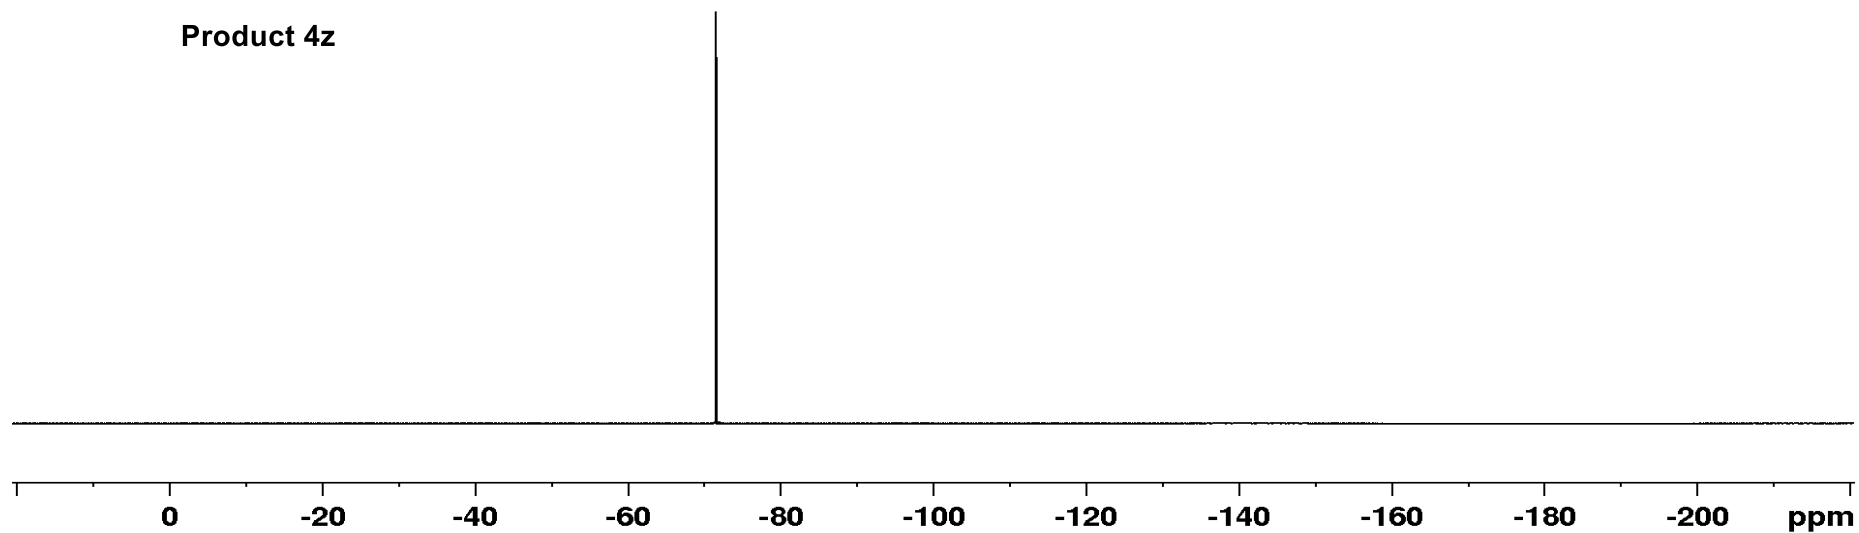

S125

SB-IV-262

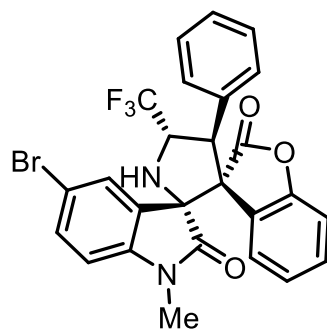

Product 4z

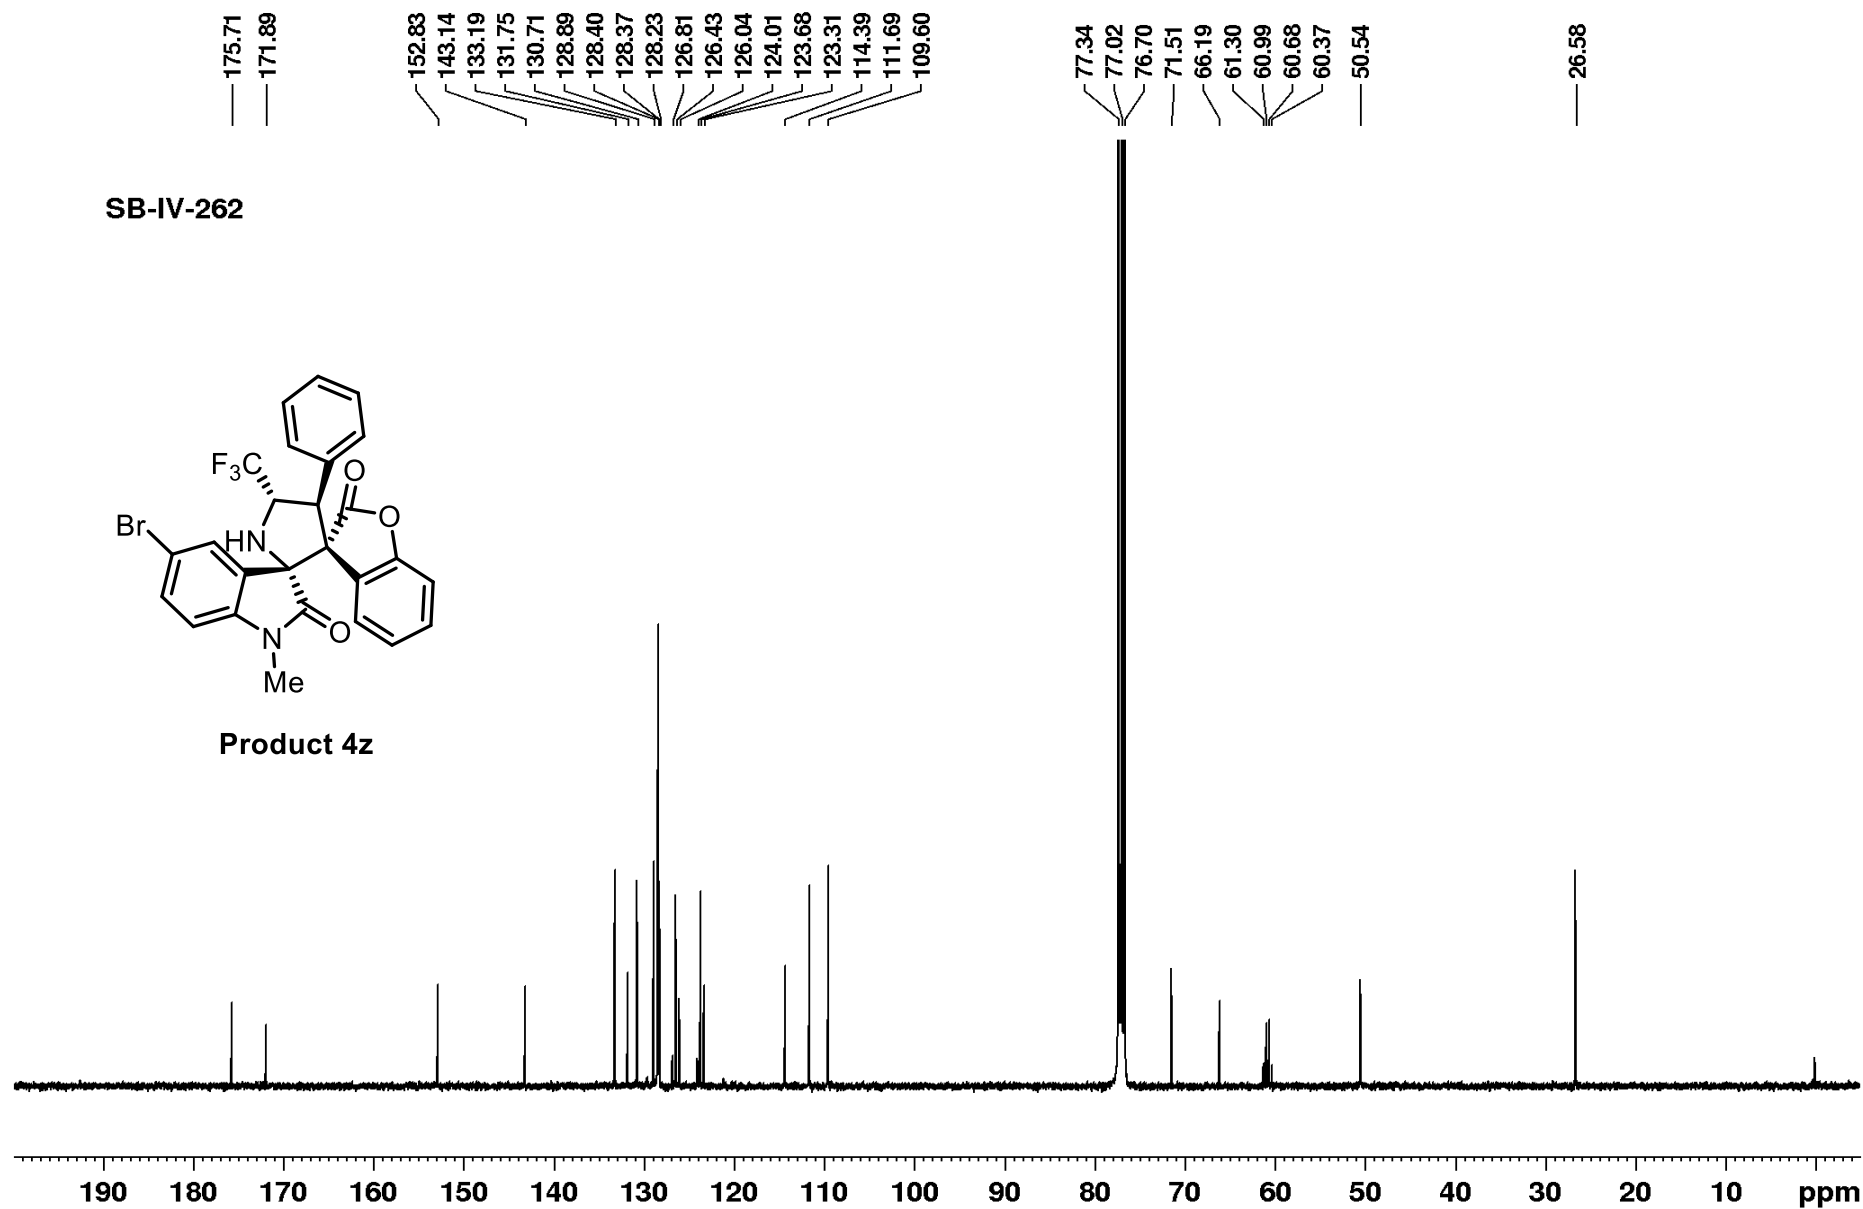

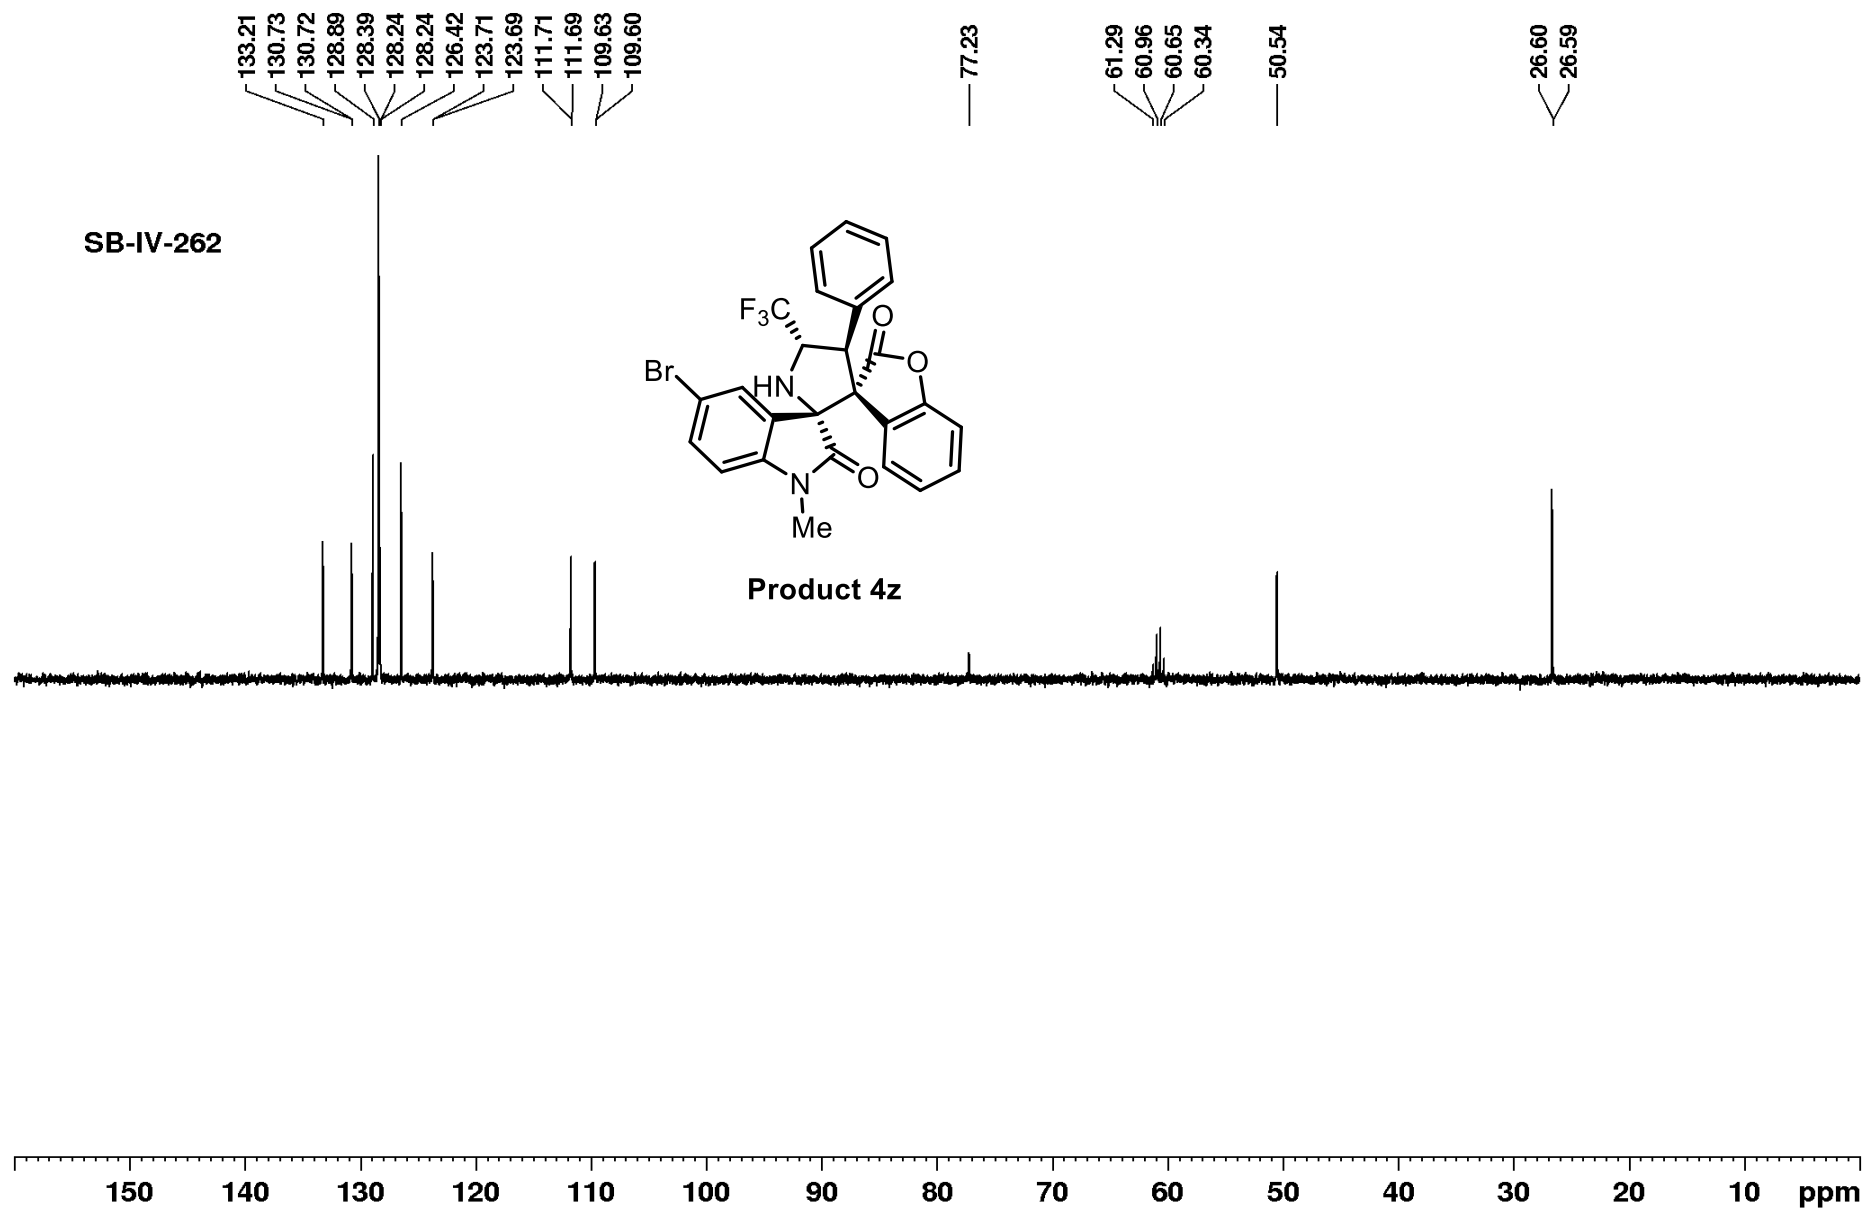

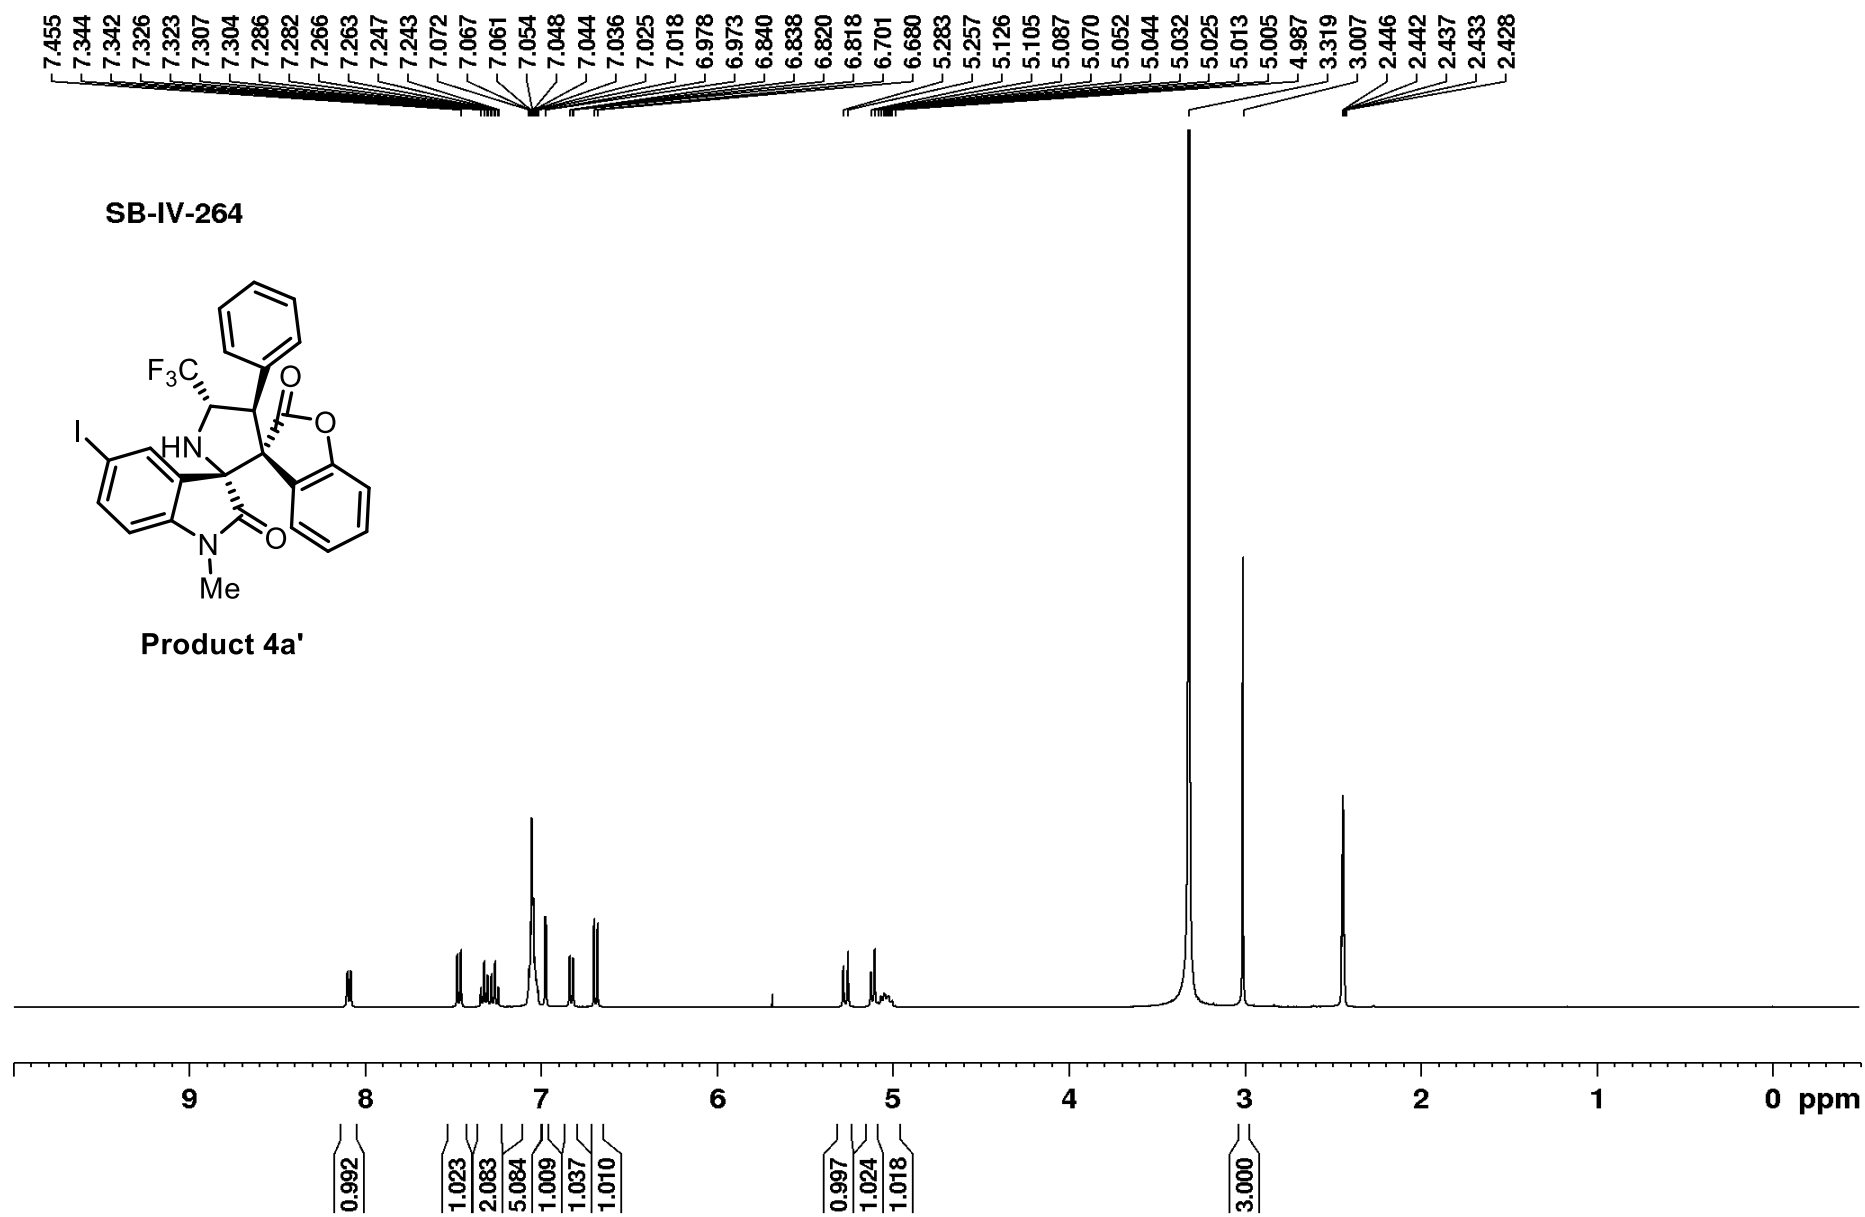

SB-IV-264

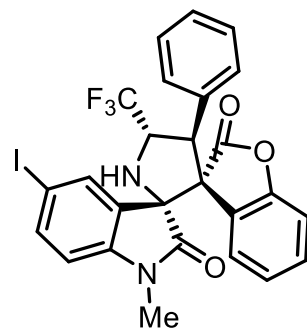

Product 4a'

— -70.66

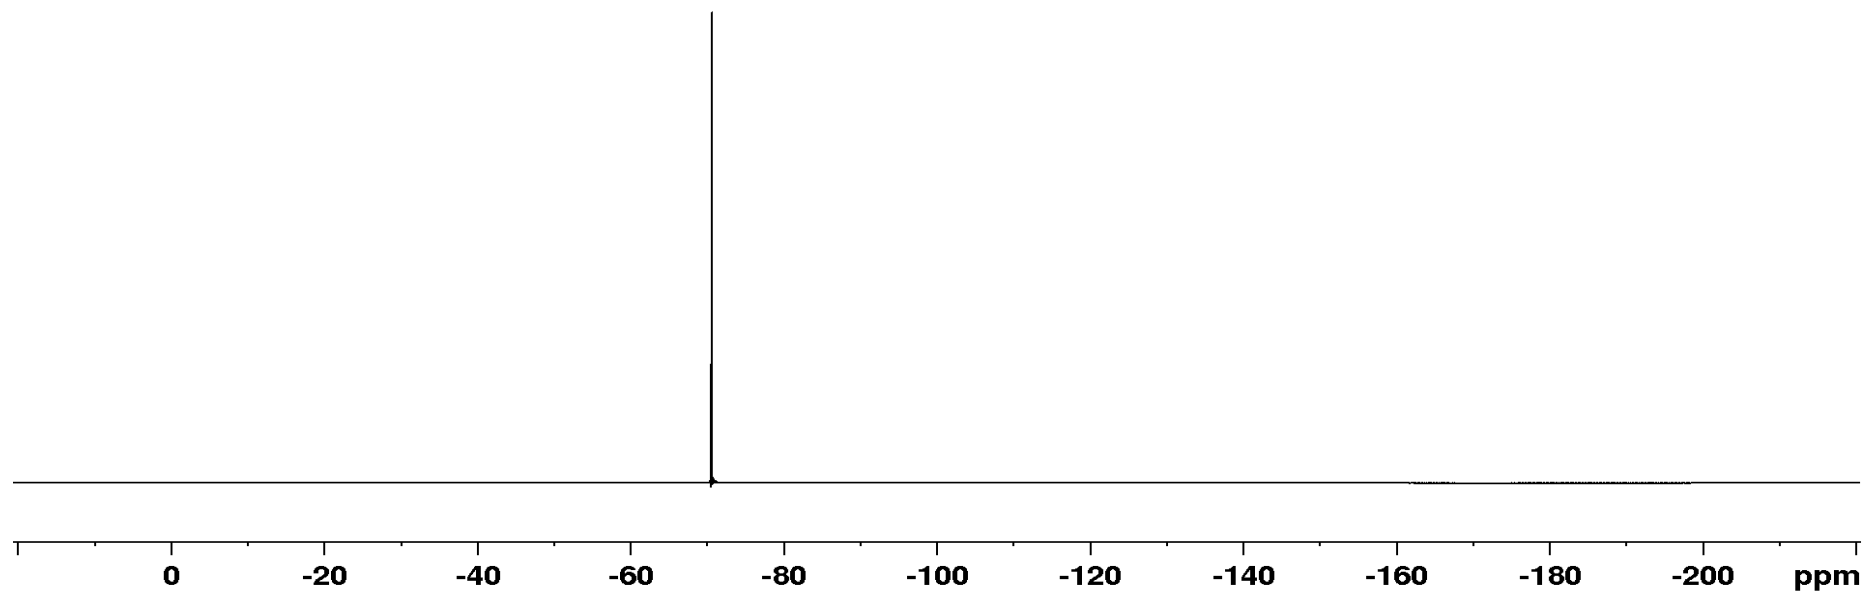

S129

SB-IV-264

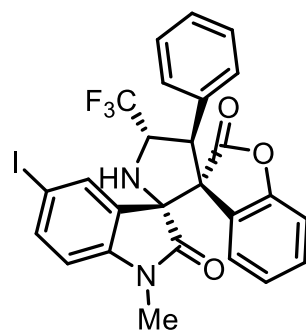

Product 4a'

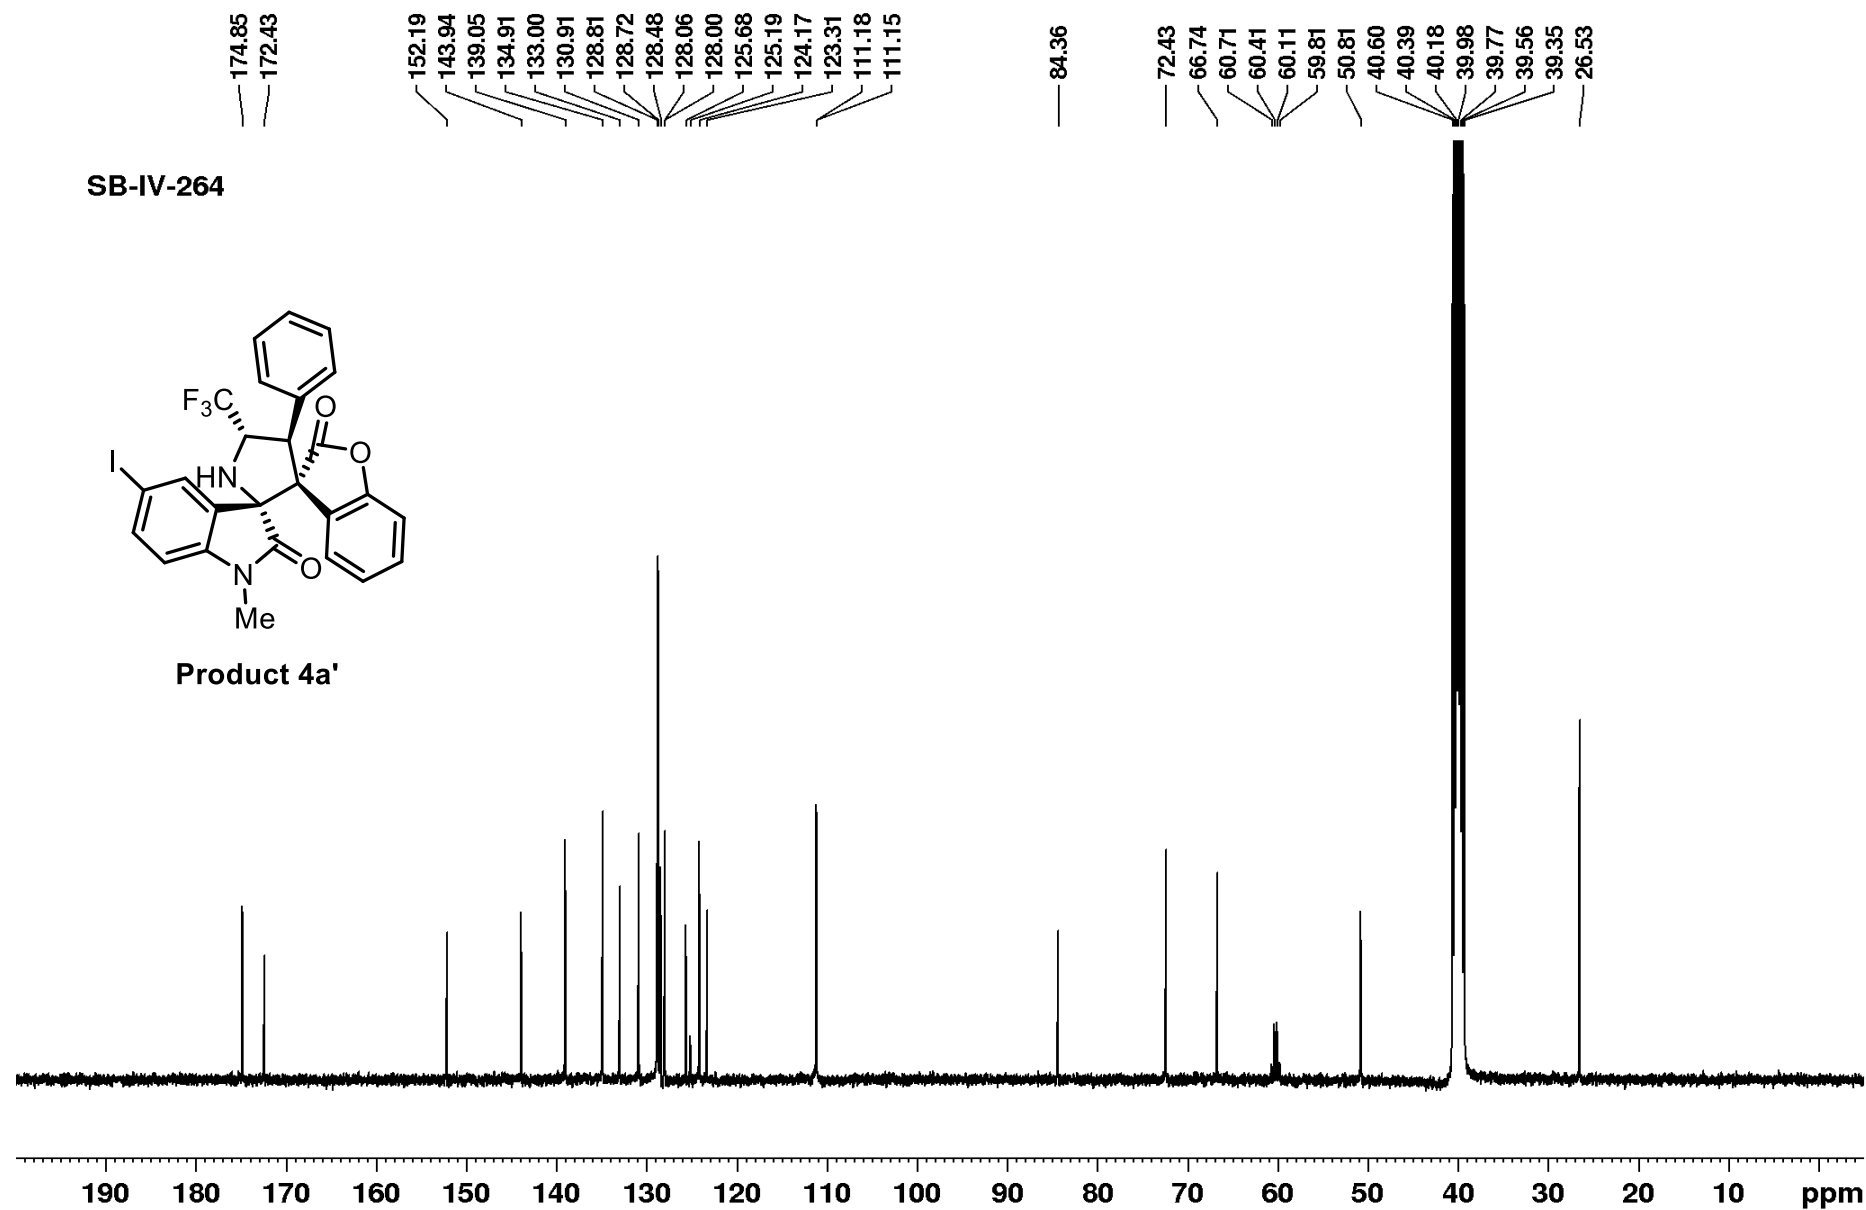

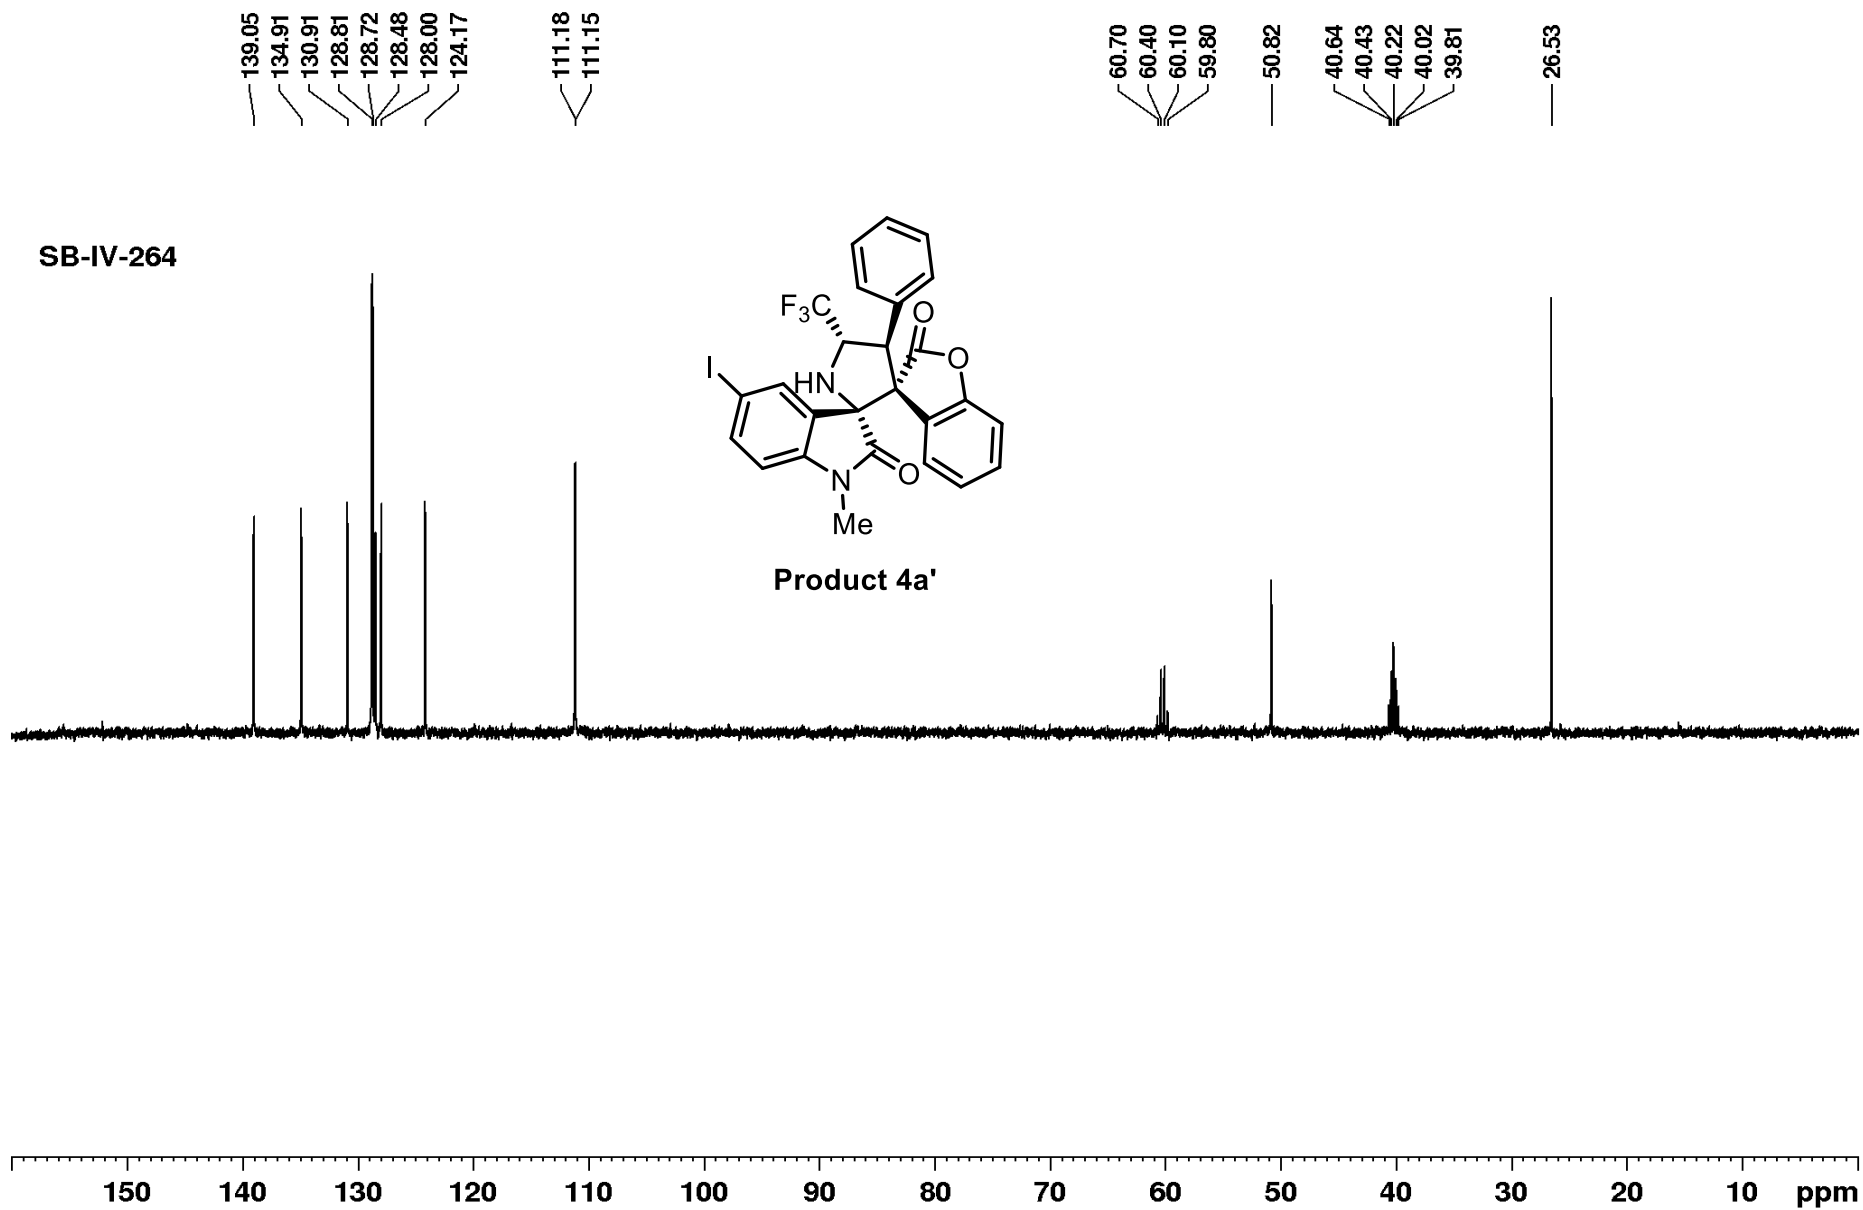

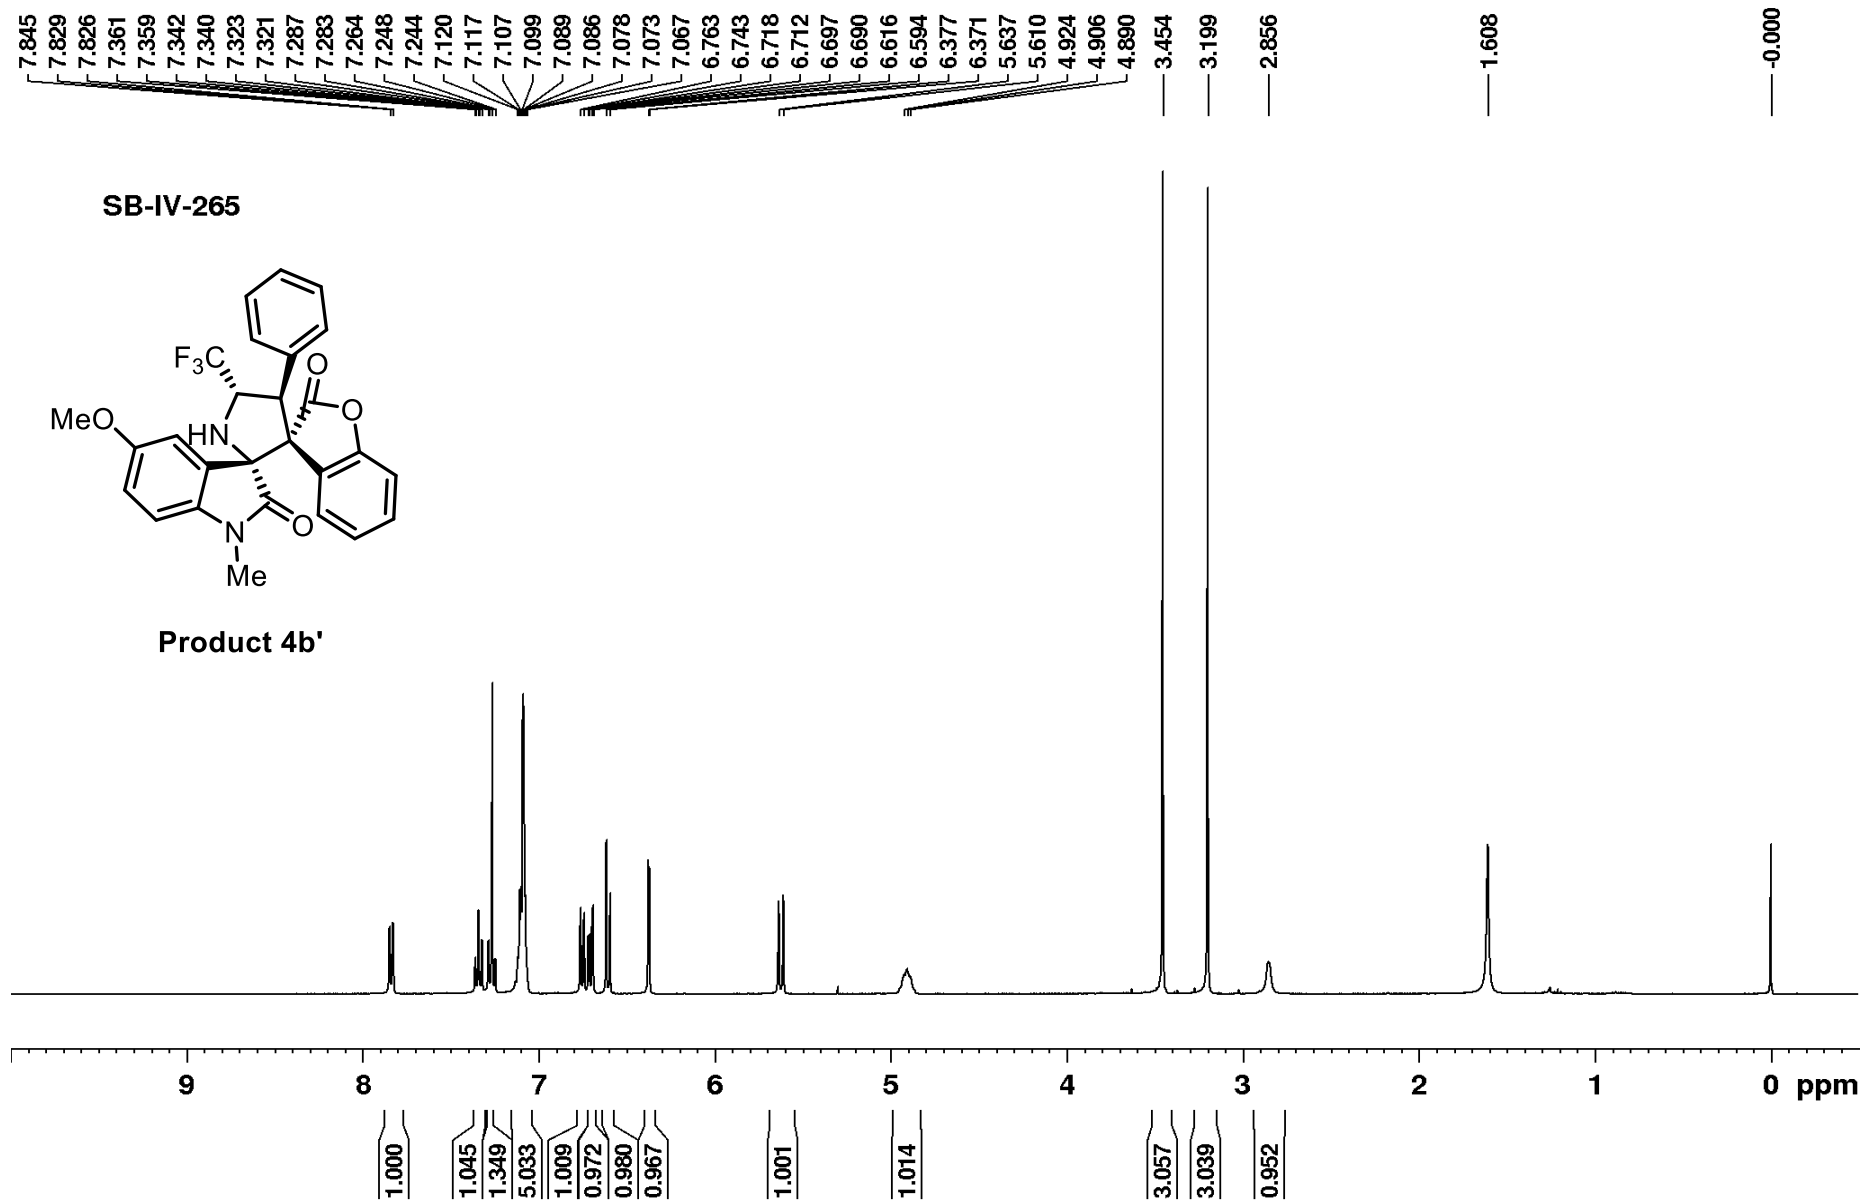



SB-IV-265

— -71.43

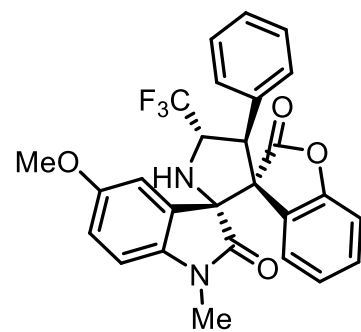

Product 4b'

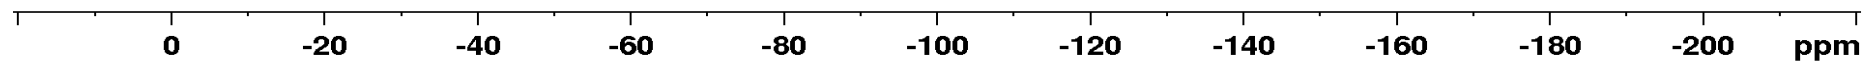

S133

SB-IV-265

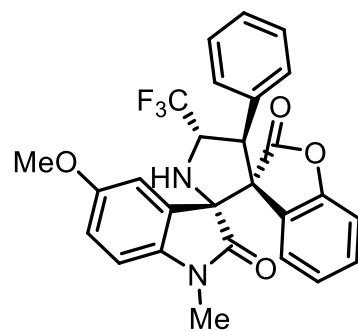

Product 4b'

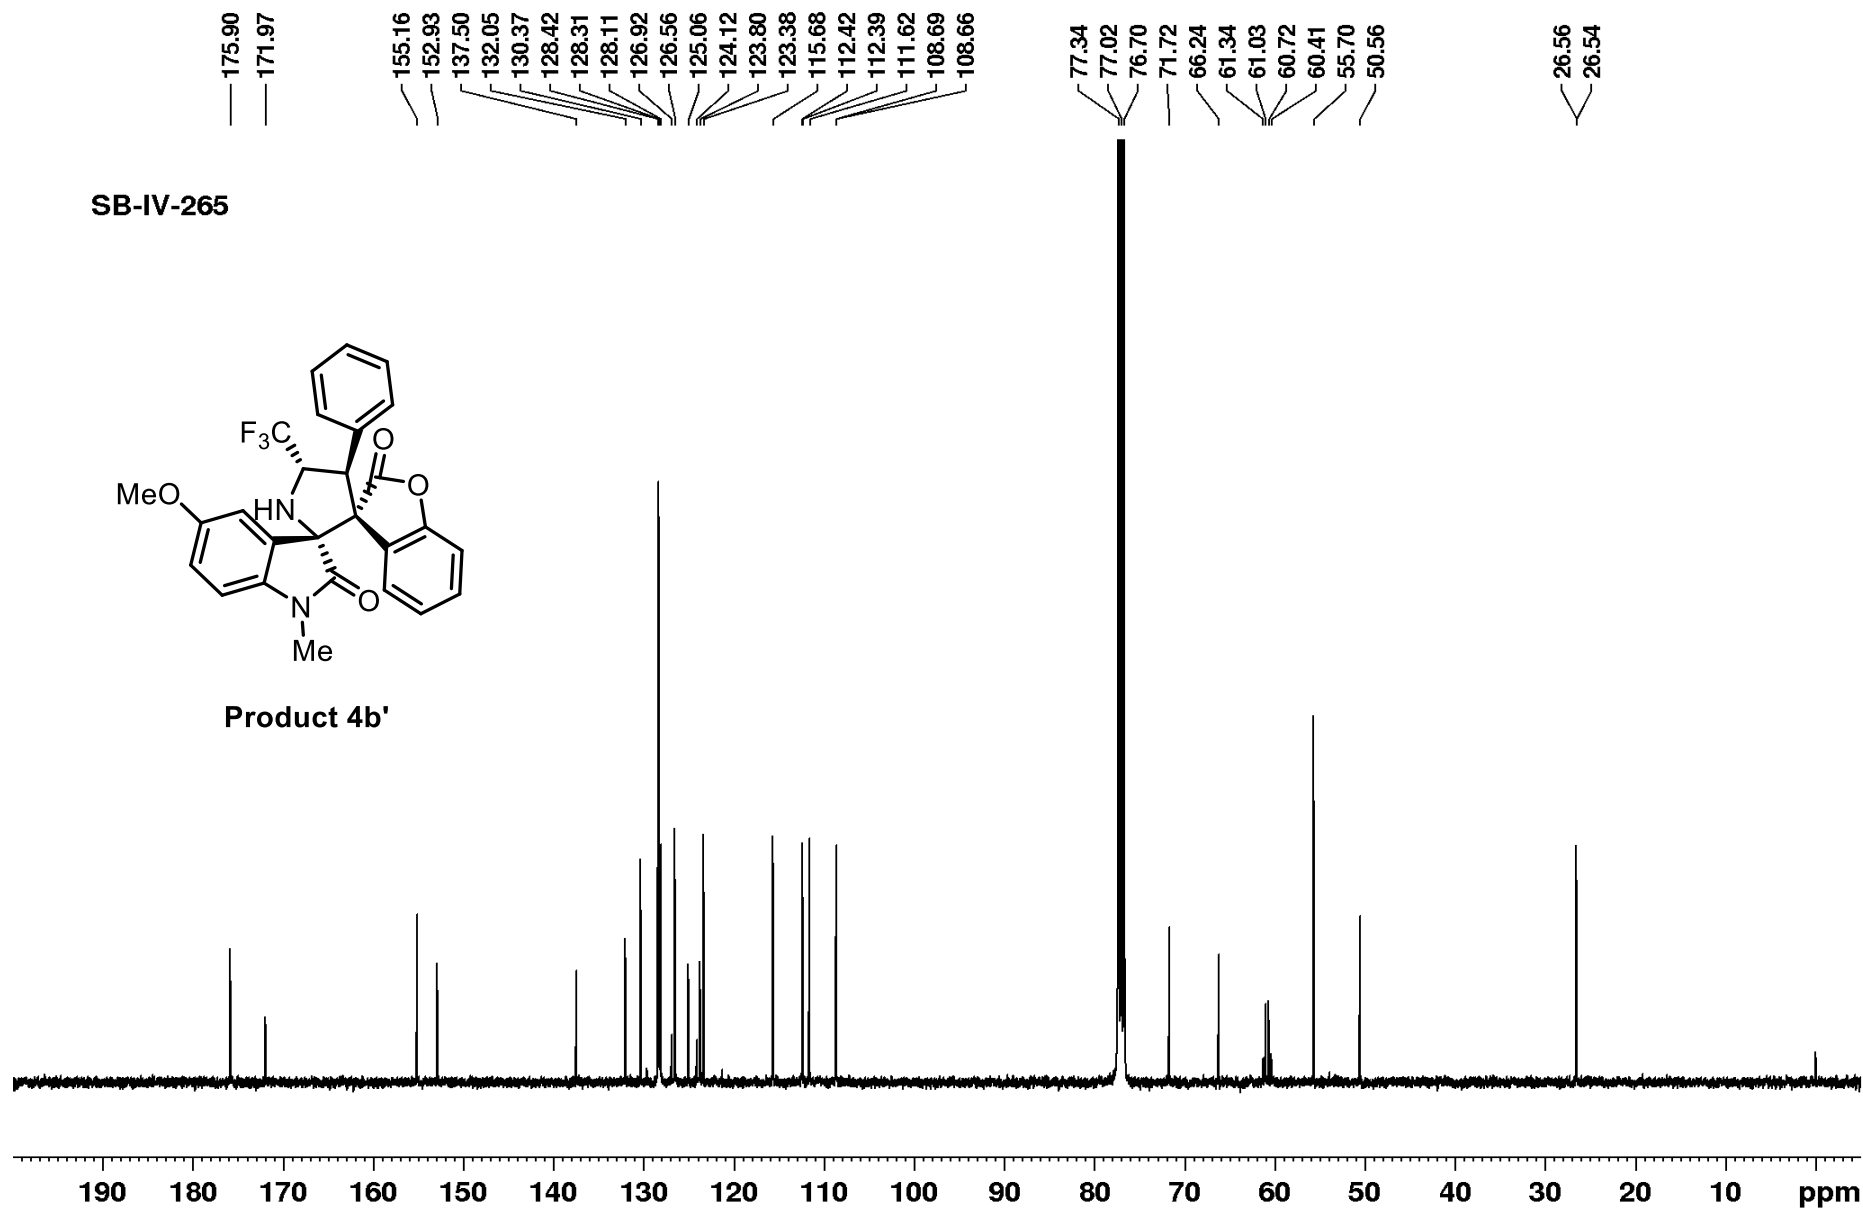

SB-IV-265

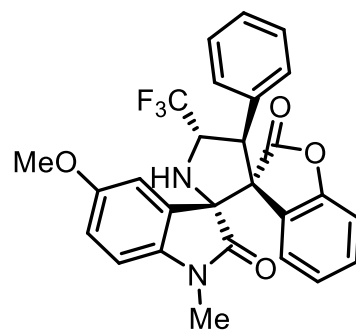

Product 4b'

130.37  
128.42  
128.32  
128.11  
126.56  
123.38  
115.68  
112.42  
111.63  
108.67

77.23

61.33  
61.02  
60.71  
60.40  
55.70  
50.57

26.54

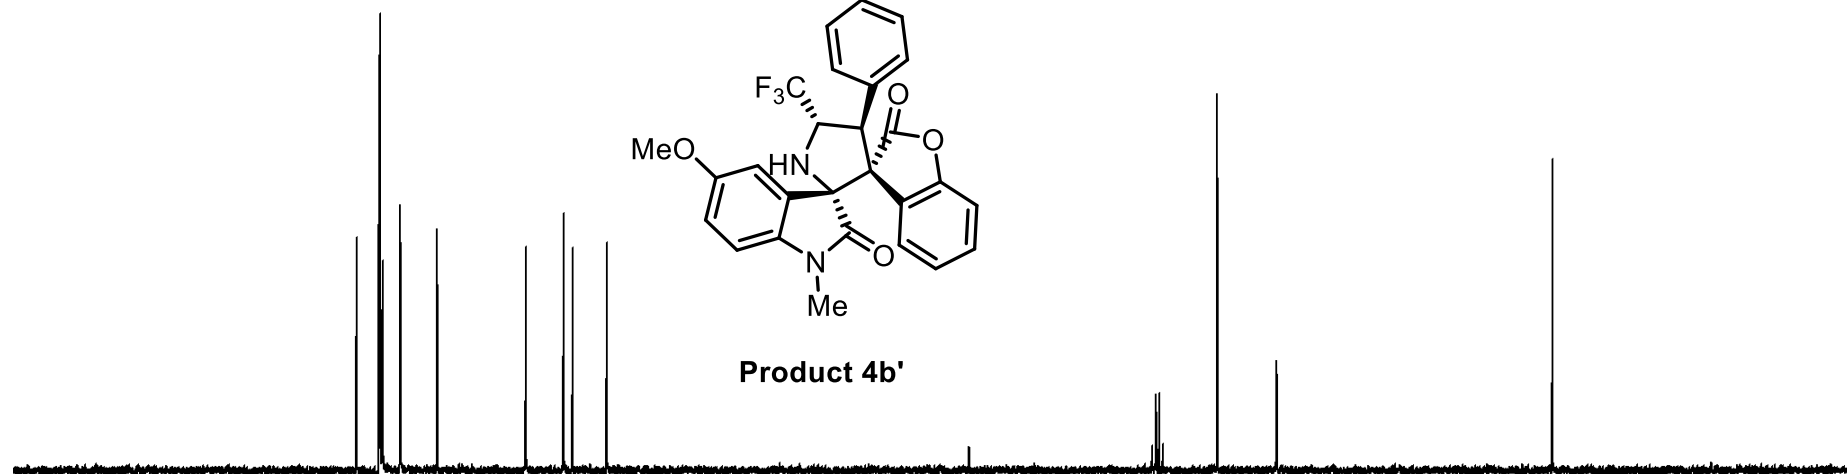

150 140 130 120 110 100 90 80 70 60 50 40 30 20 10 ppm

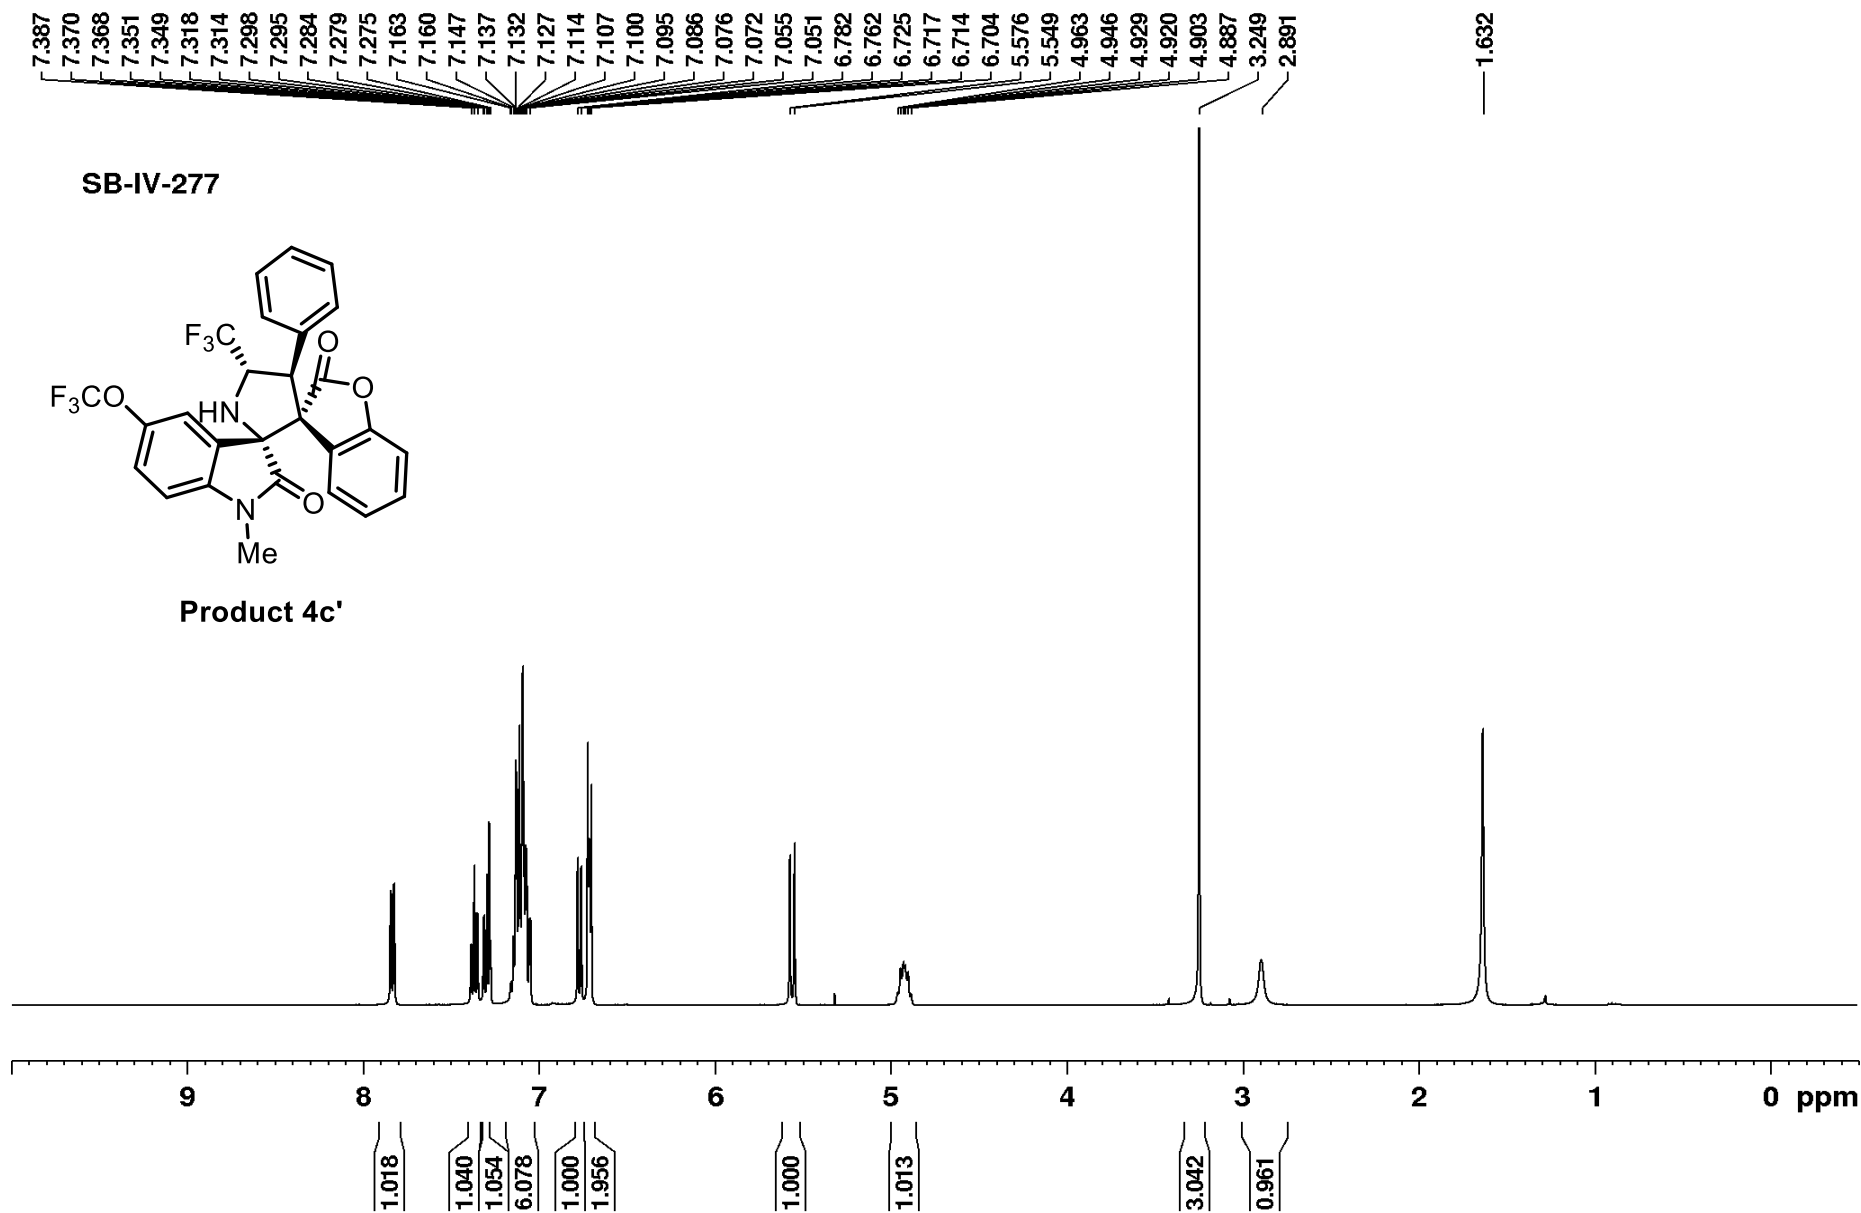

SB-IV-277

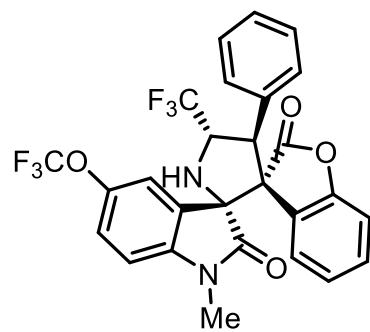

Product 4c'

— -58.68

— -71.51

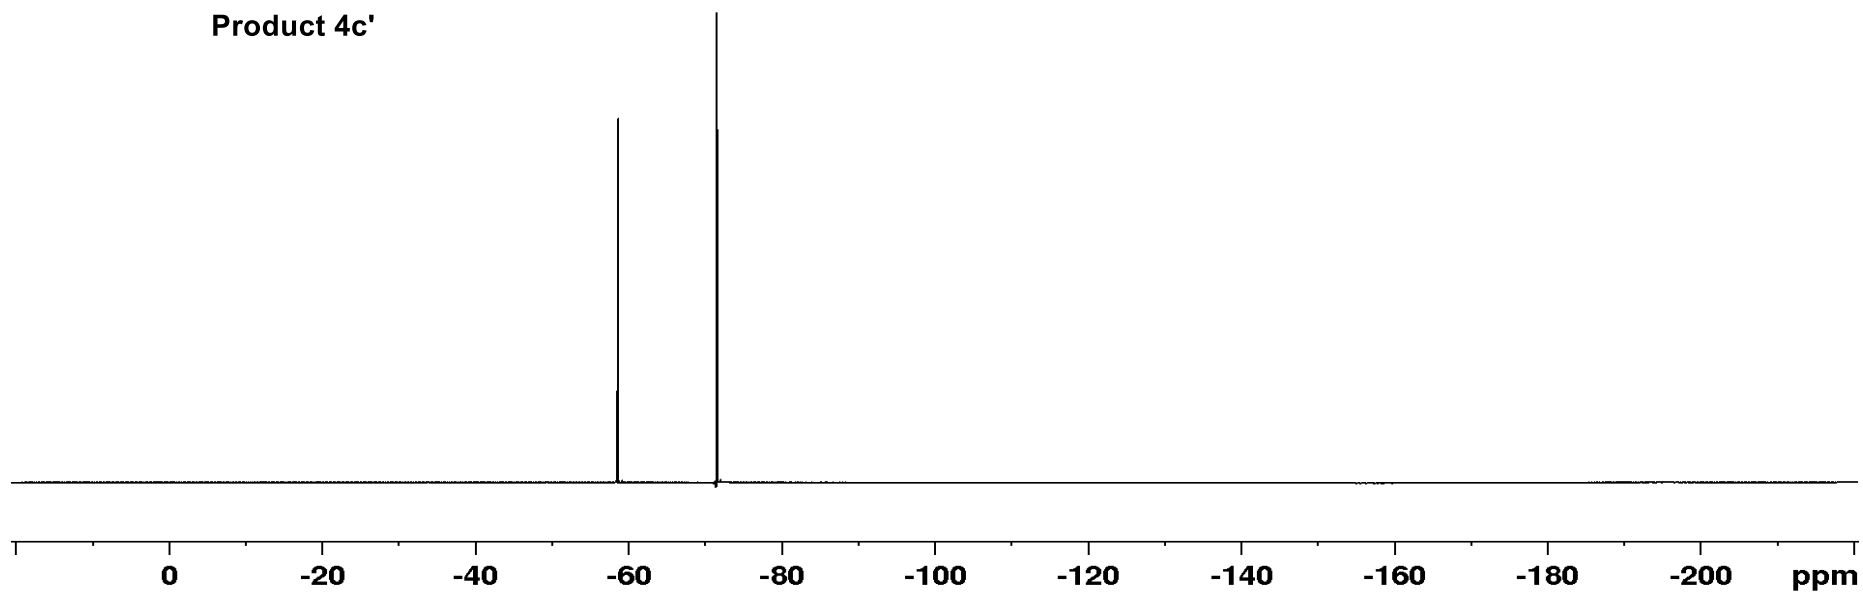

SB-IV-277

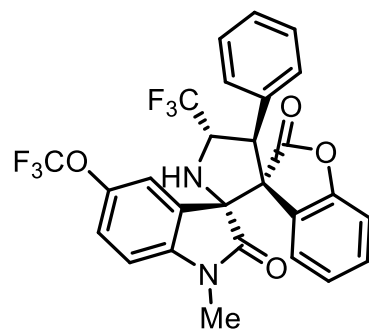

Product 4c'

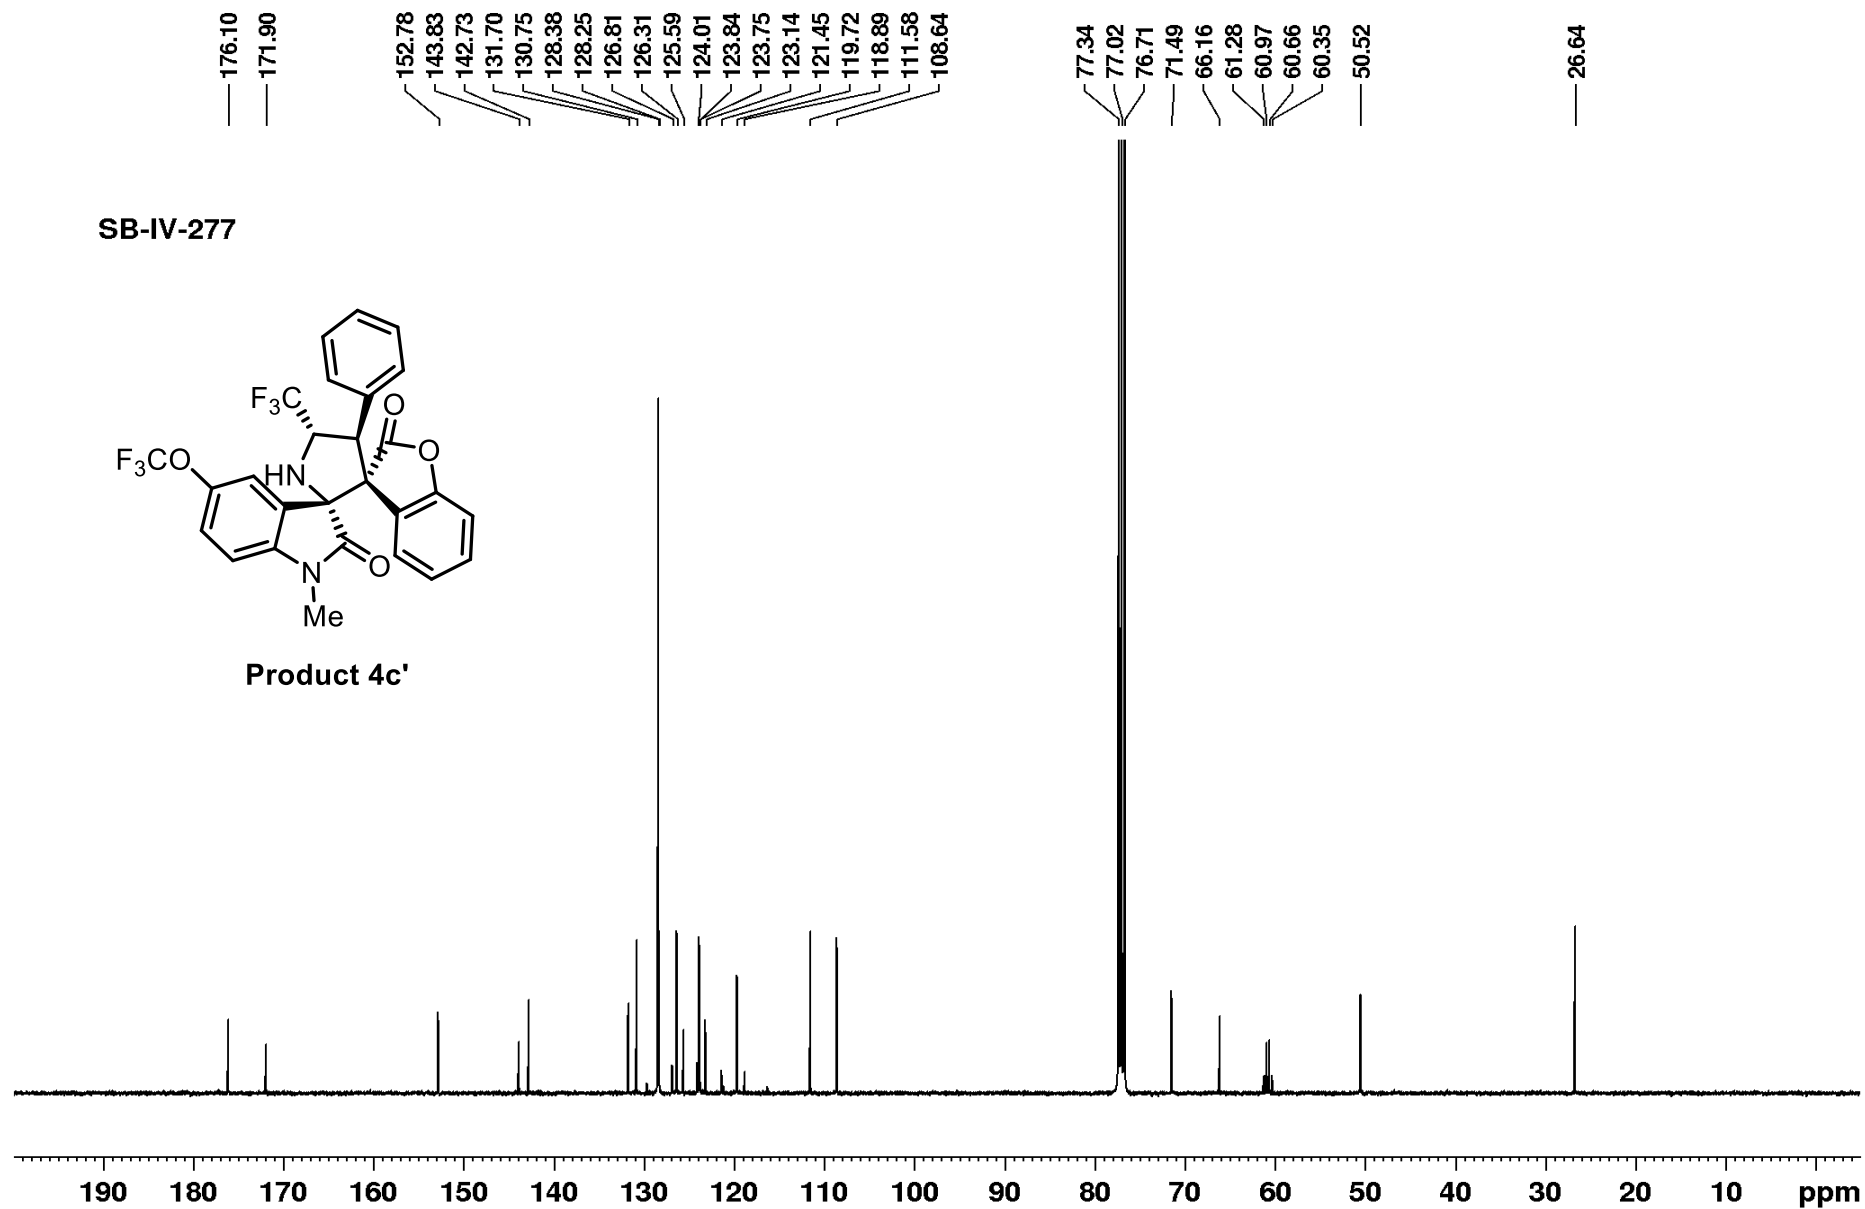

SB-IV-277

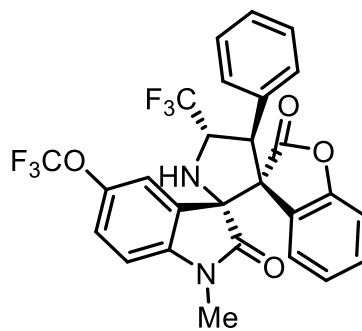

Product 4c'

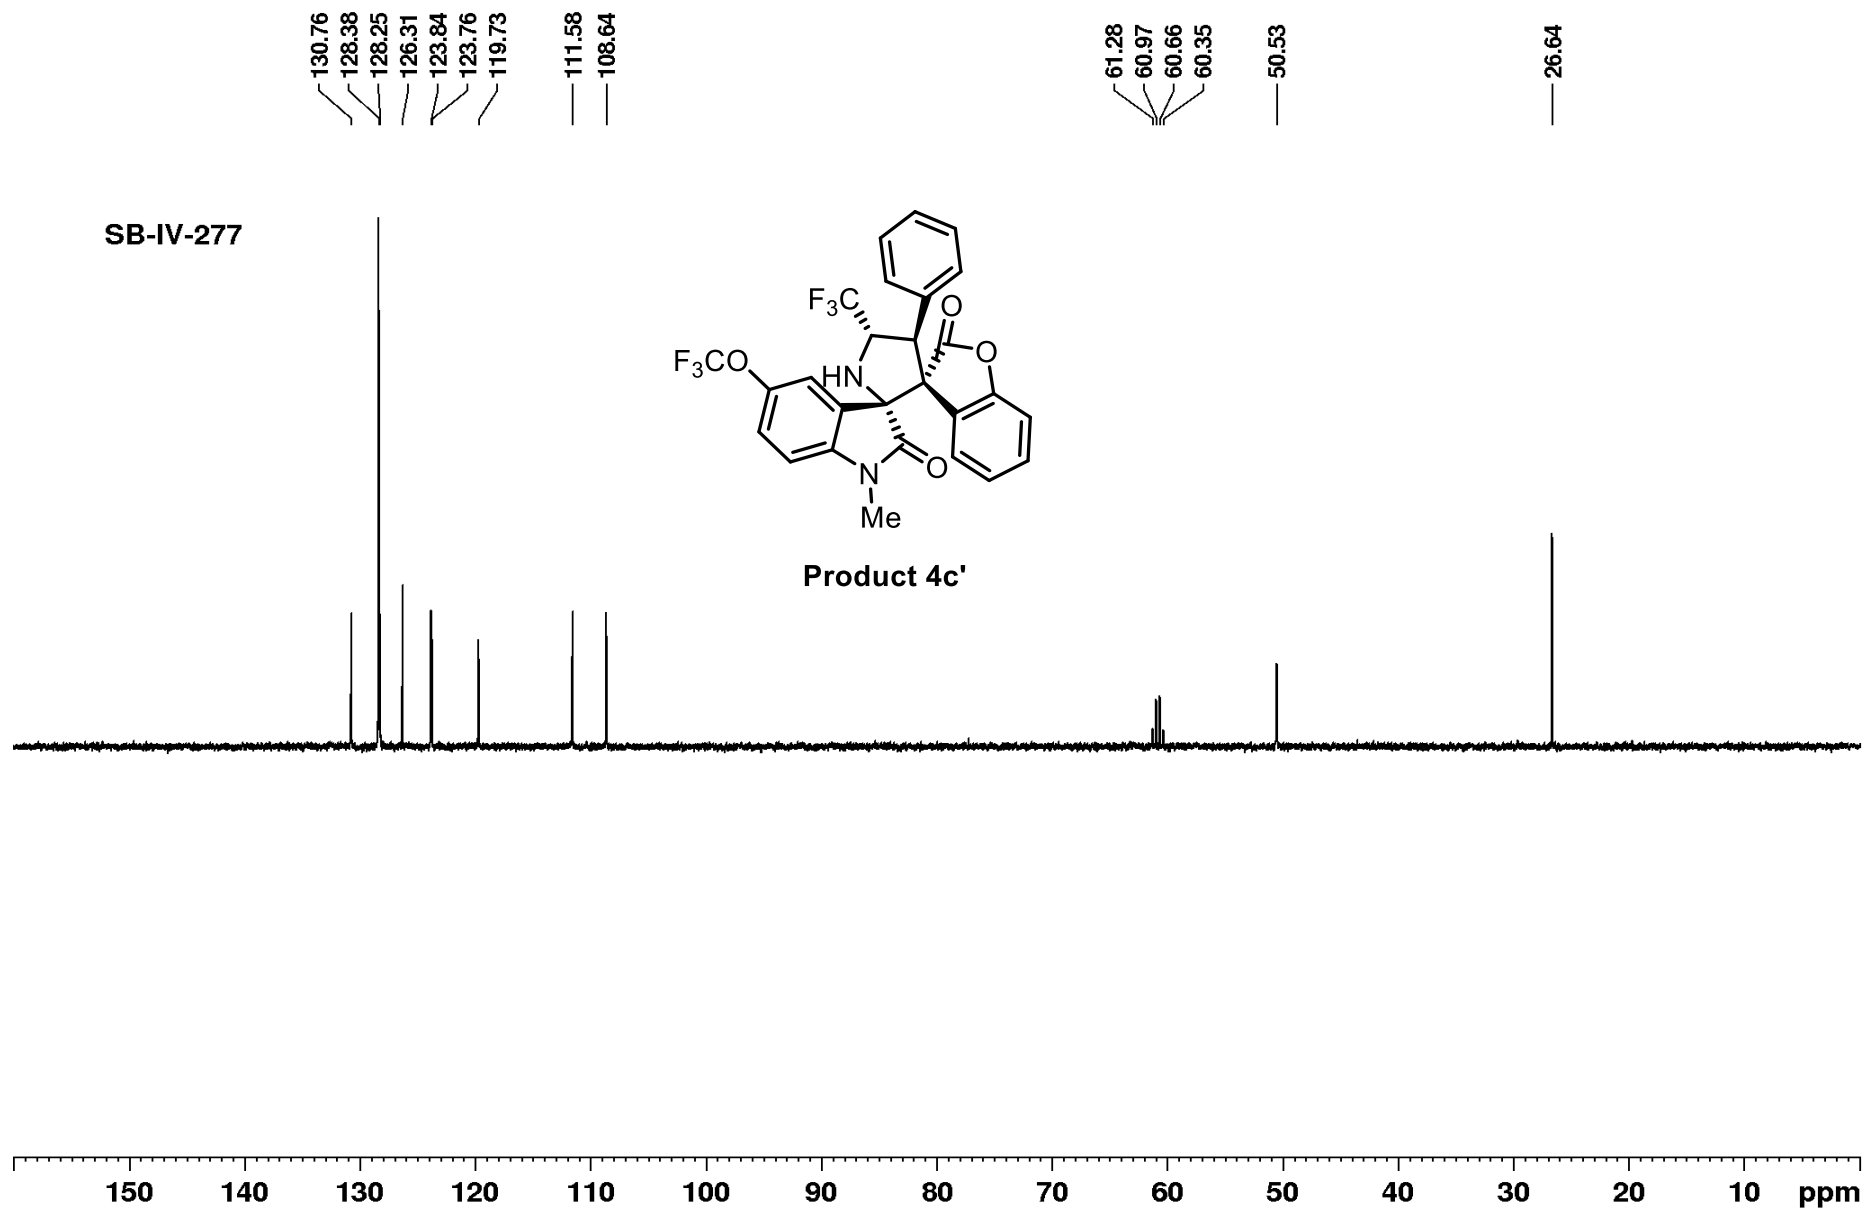

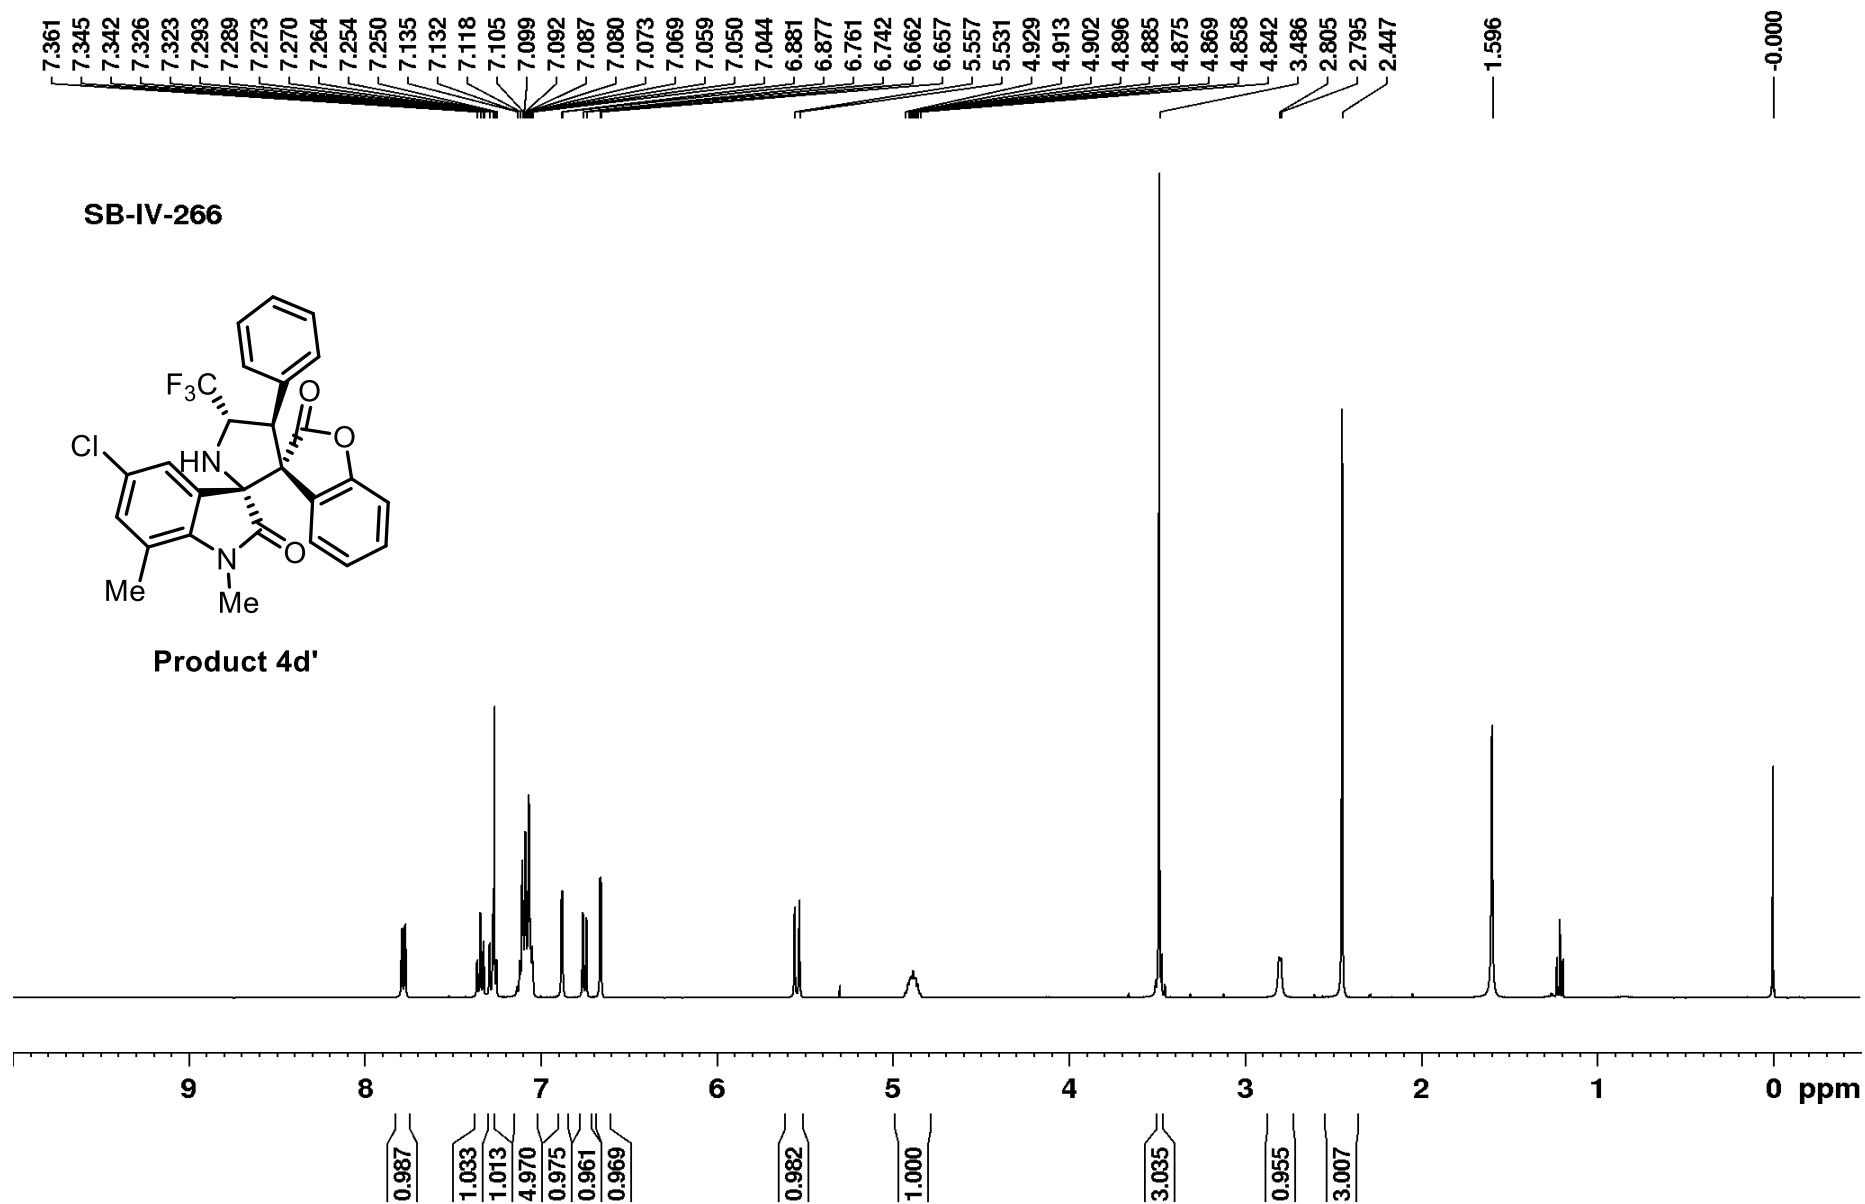



SB-IV-266

—71.52

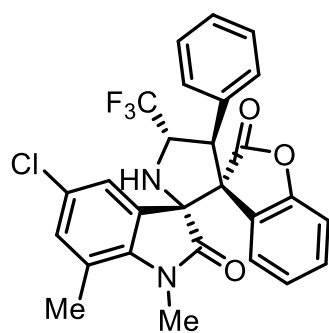

Product 4d'

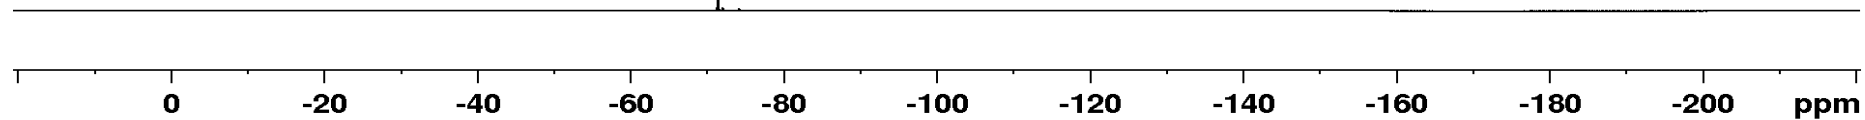

S141

SB-IV-266

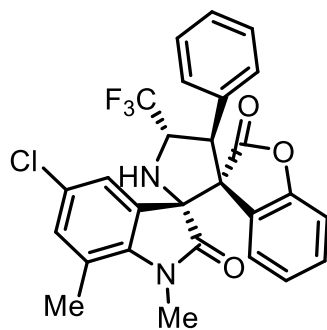

Product 4d'

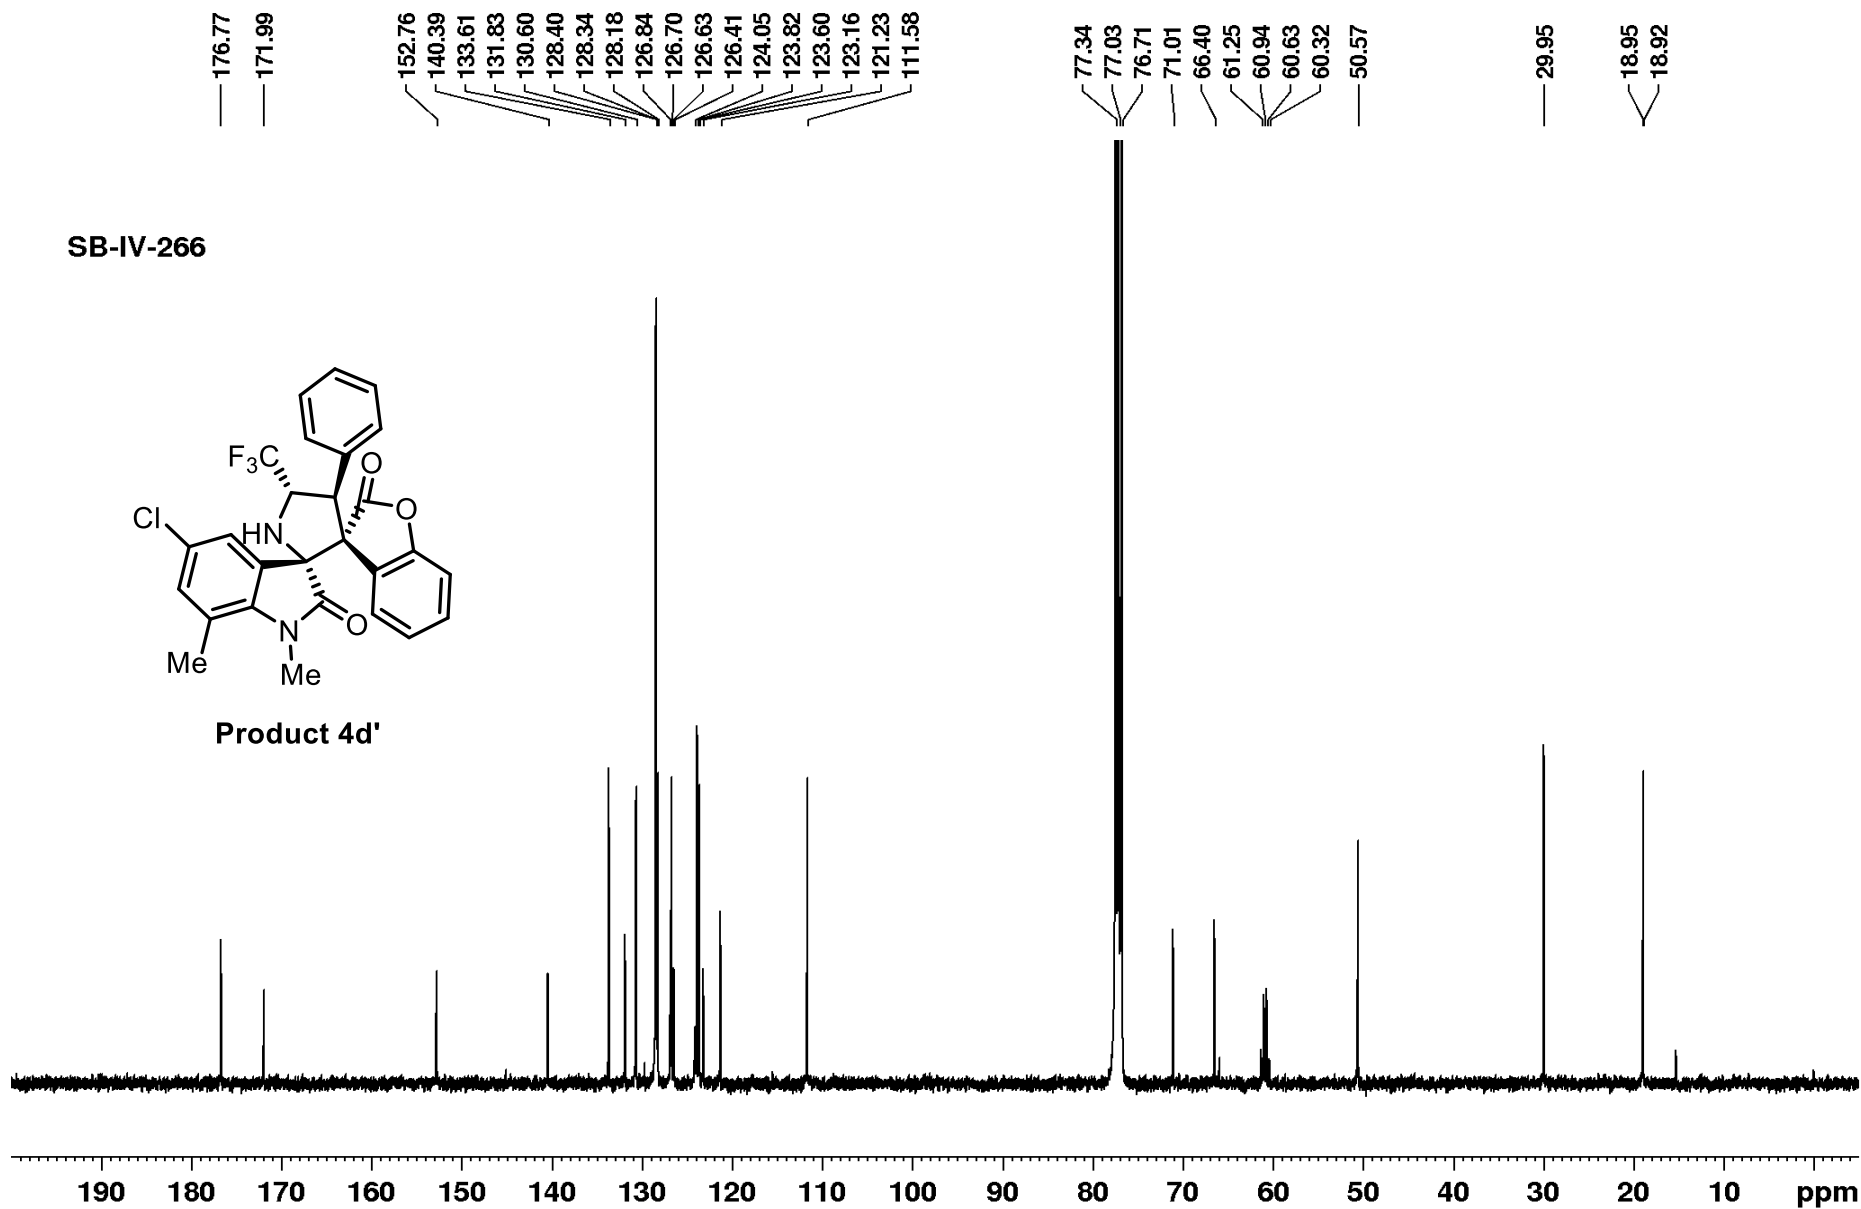

SB-IV-266

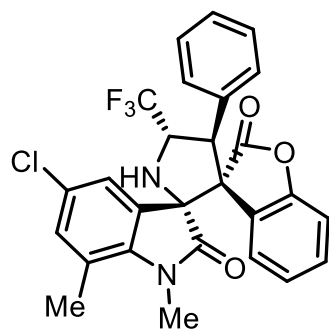

Product 4d'

133.62  
130.60  
128.40  
128.34  
128.17  
126.63  
123.82  
123.60  
111.59

77.23

60.92  
60.61  
60.30

50.58

29.95

18.94

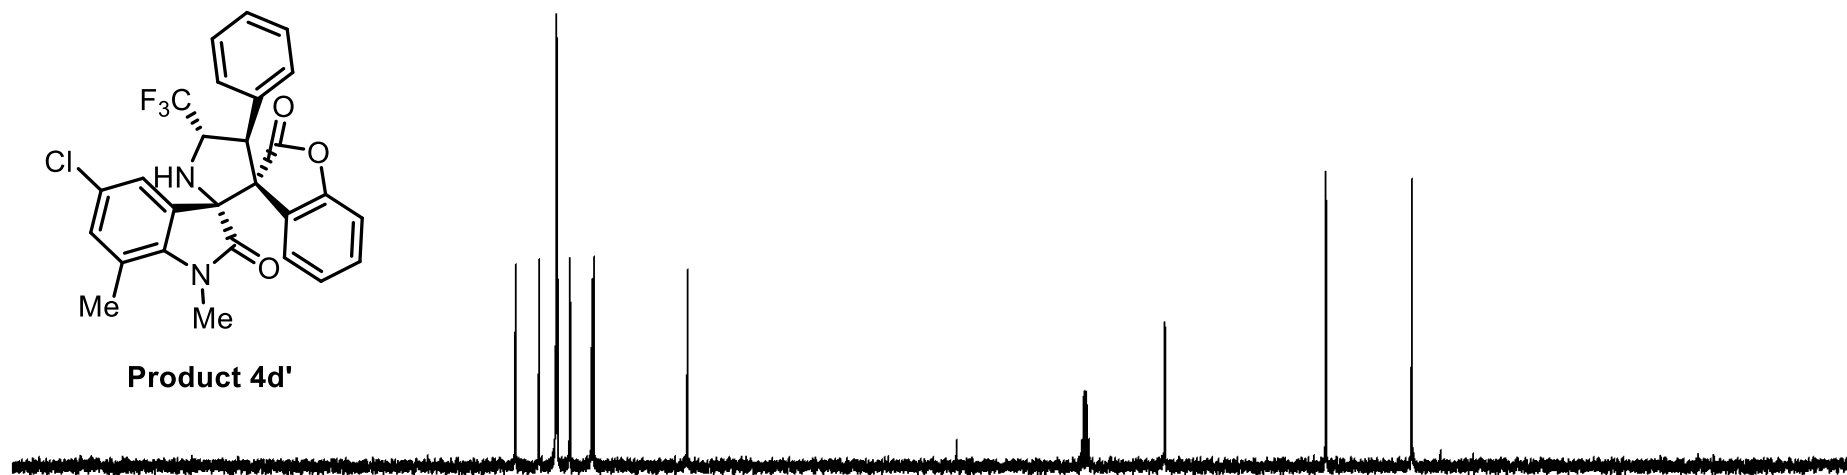

190 180 170 160 150 140 130 120 110 100 90 80 70 60 50 40 30 20 10 0 -10 -20 ppm

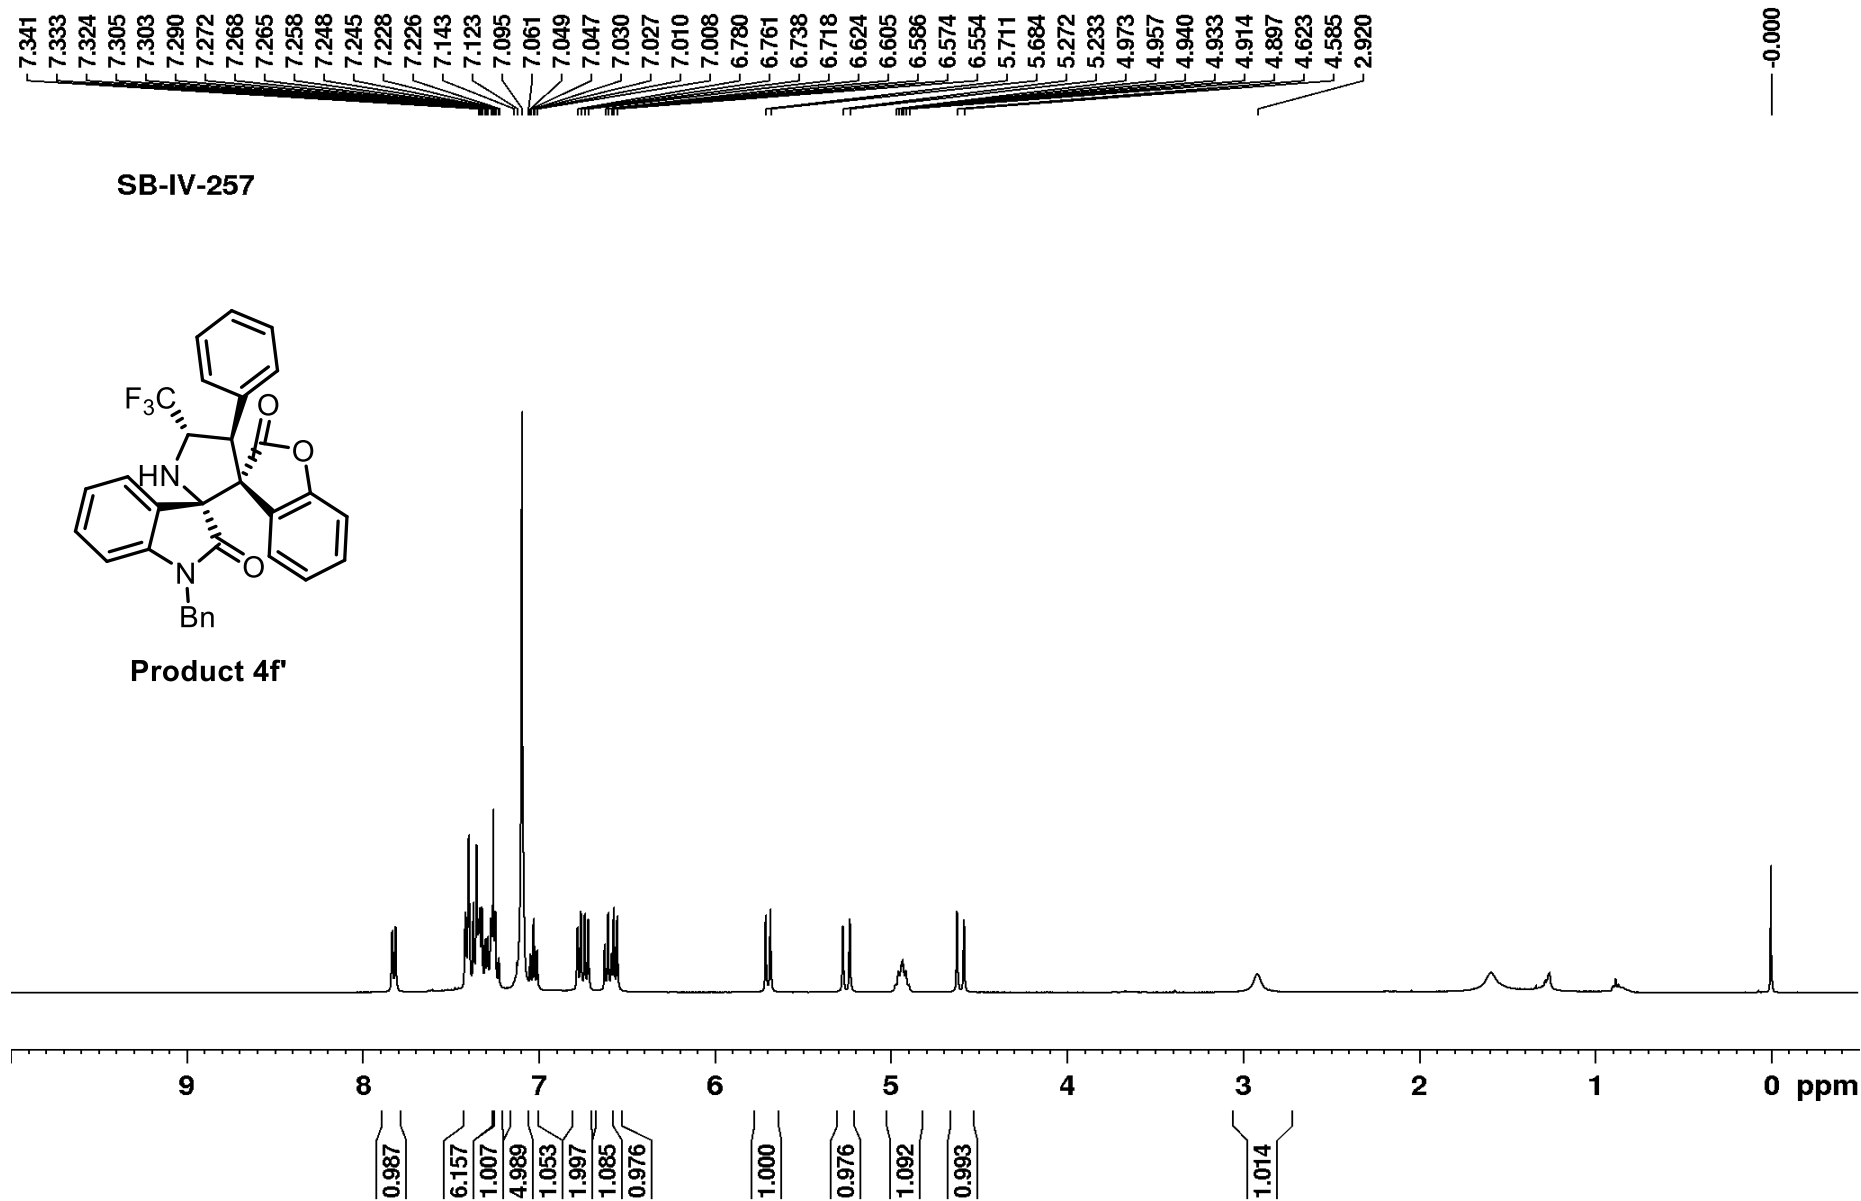

SB-IV-257

—71.52

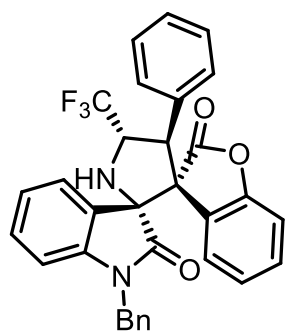

Product 4f'

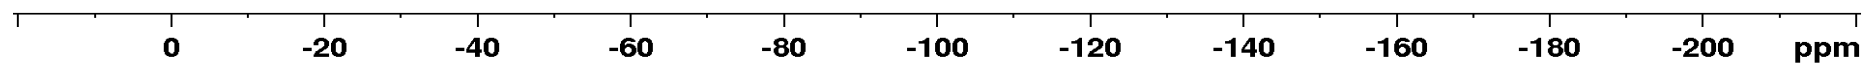

S145

SB-IV-257

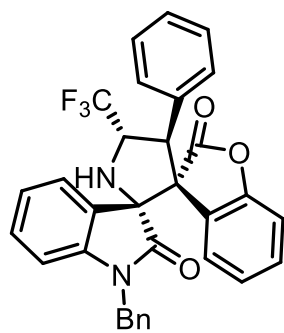

Product 4f'

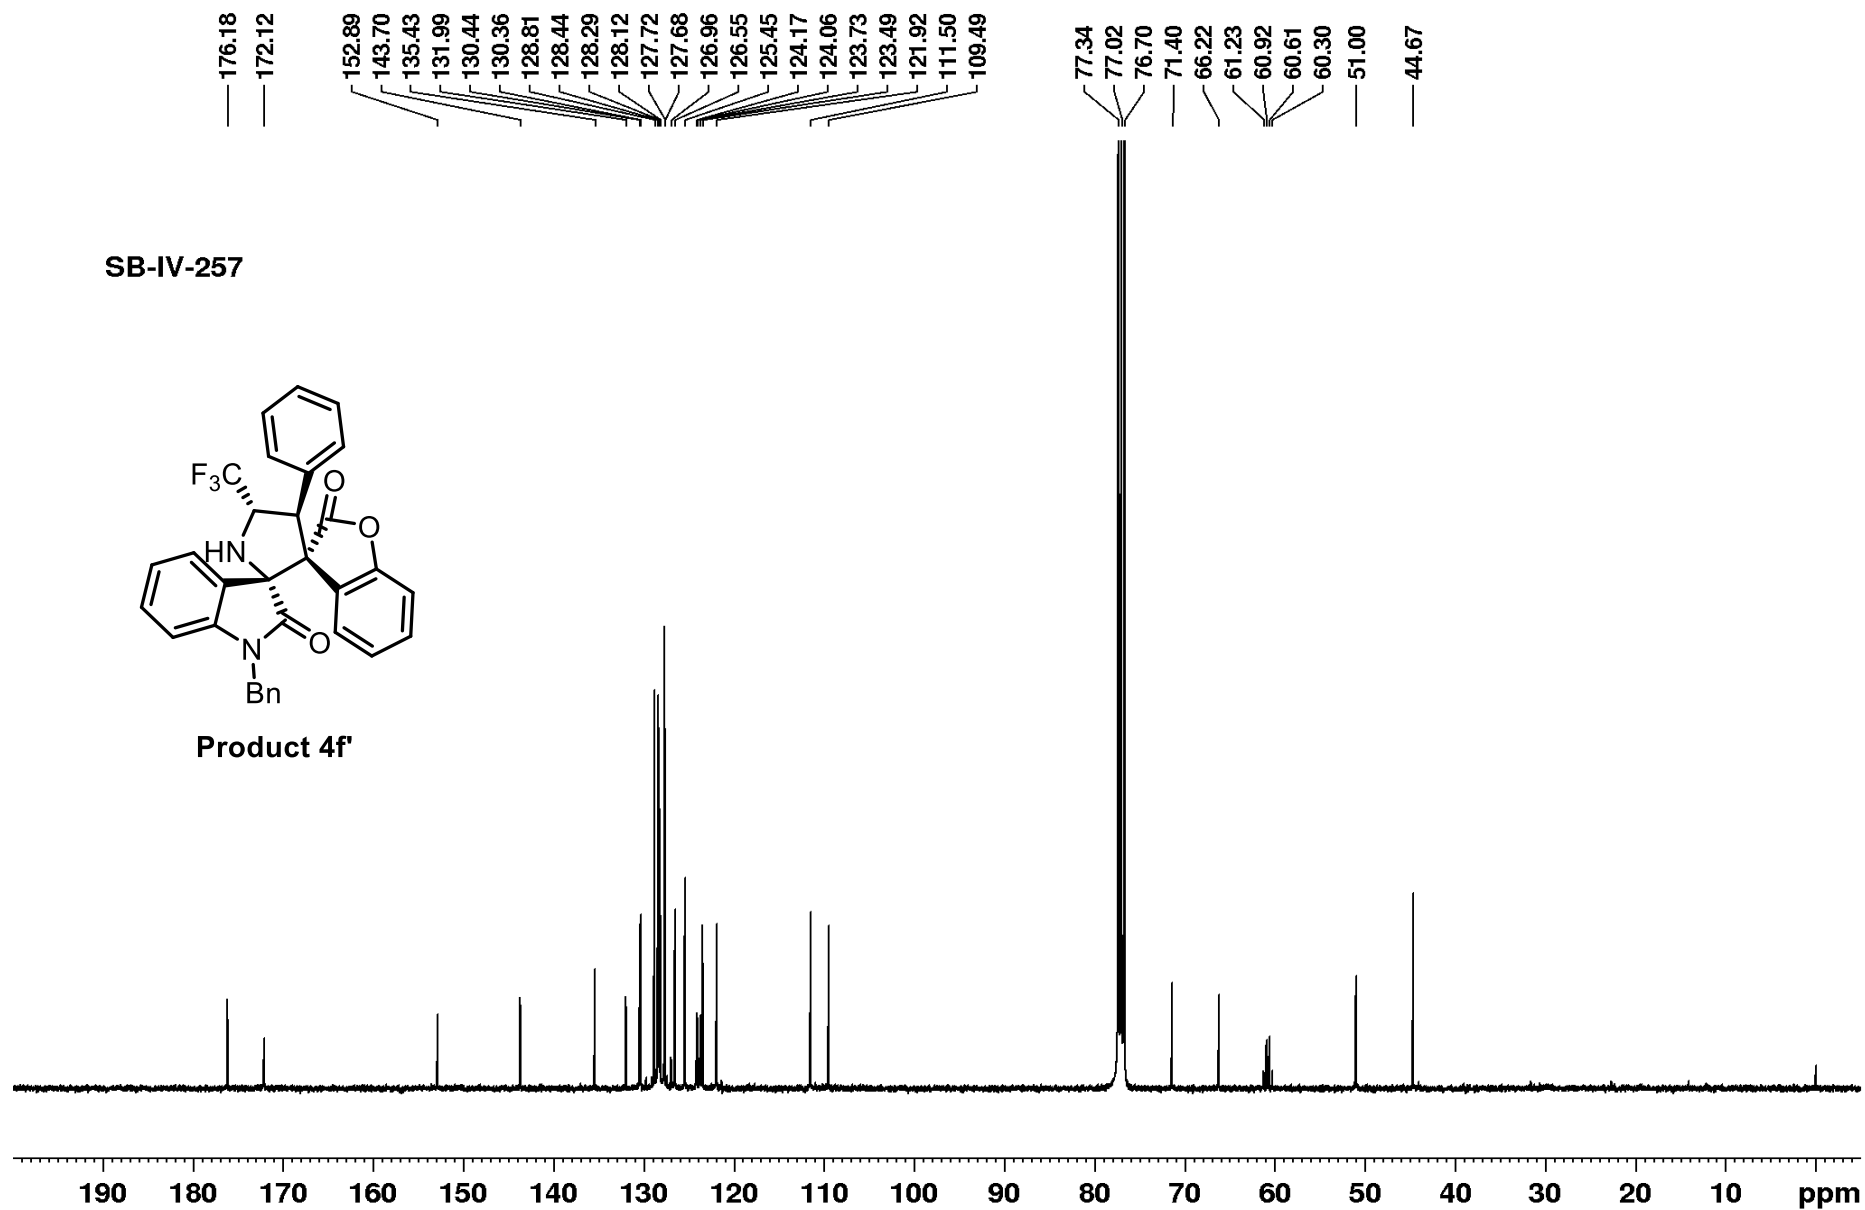

SB-IV-257

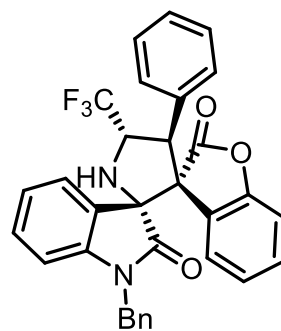

Product 4f'

130.44  
130.37  
128.81  
128.44  
128.29  
128.13  
127.72  
127.68  
126.55  
125.45  
123.50  
121.93  
111.51  
109.50

77.22

61.23  
60.92  
60.61  
60.30

51.00

44.67

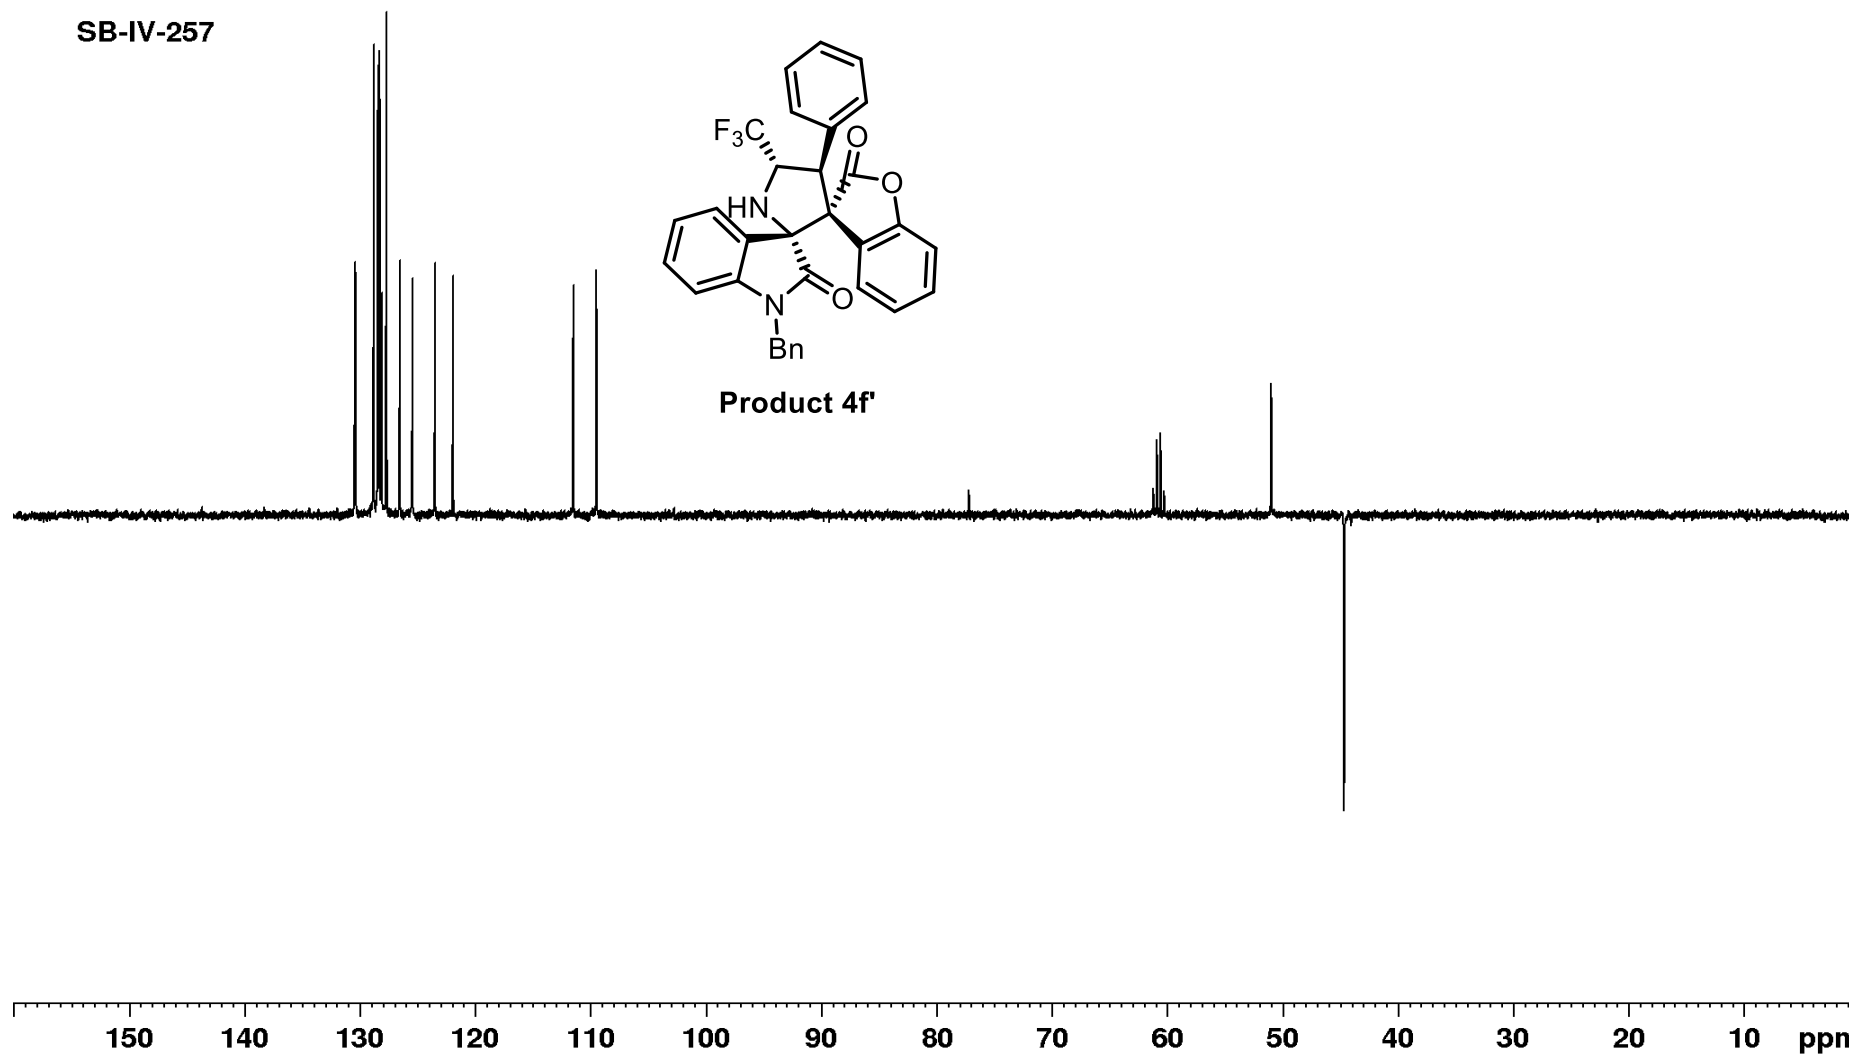

7.496  
7.475  
7.349  
7.330  
7.310  
7.288  
7.279  
7.276  
7.262  
7.240  
7.237  
7.127  
7.117  
7.109  
7.097  
7.094  
7.086  
7.071  
7.068  
7.049  
7.029  
6.787  
6.768  
6.748  
6.728  
6.647  
6.628  
6.609  
6.533  
6.513  
5.684  
5.658  
5.255  
5.216  
4.977  
4.960  
4.932  
4.906  
4.885  
4.524  
4.484  
2.916

1.582

-0.000

SB-IV-269

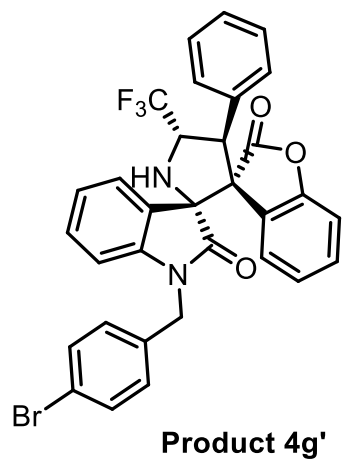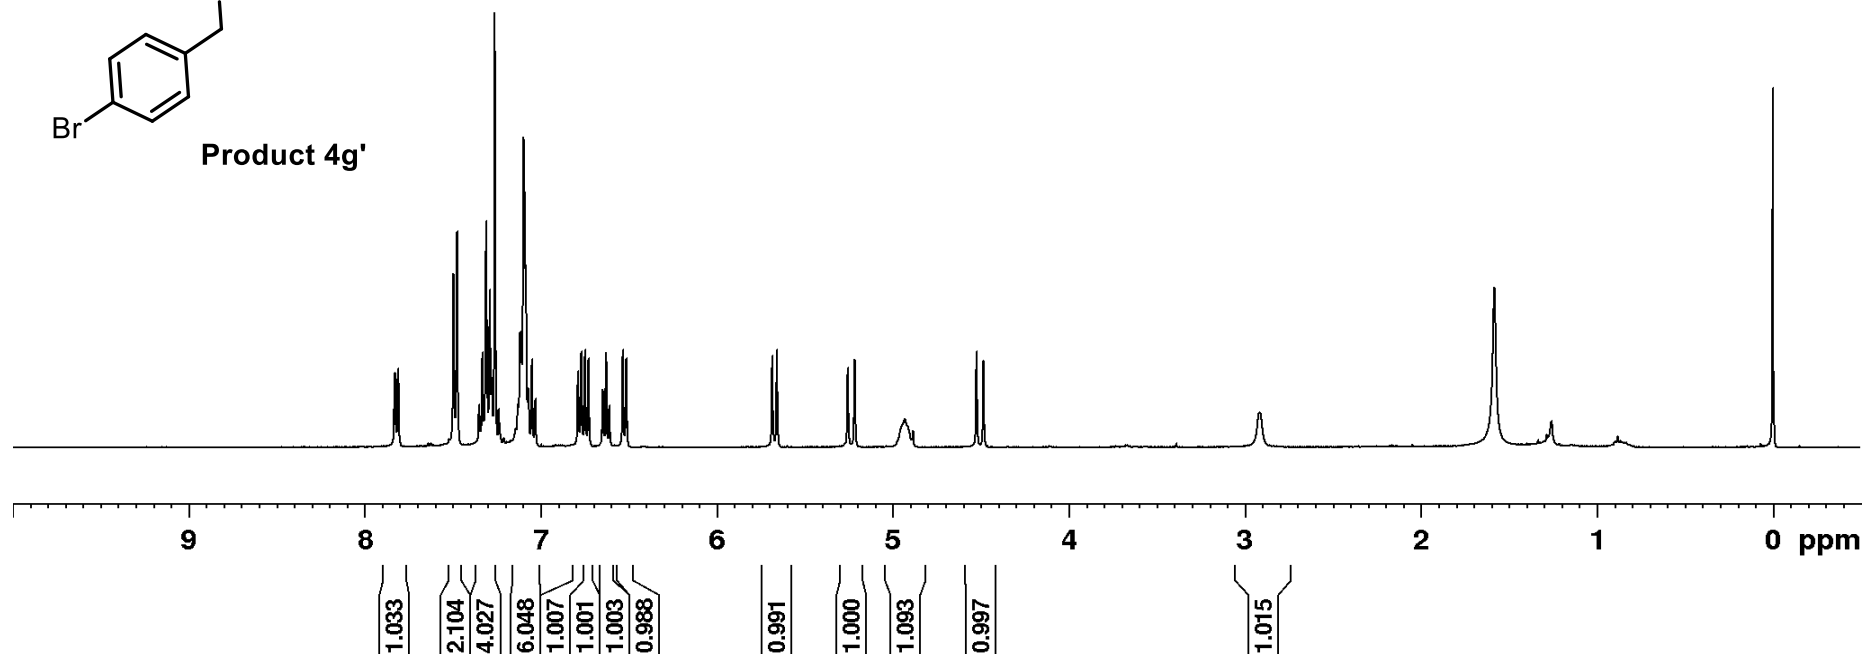

S148



SB-IV-269

—71.57

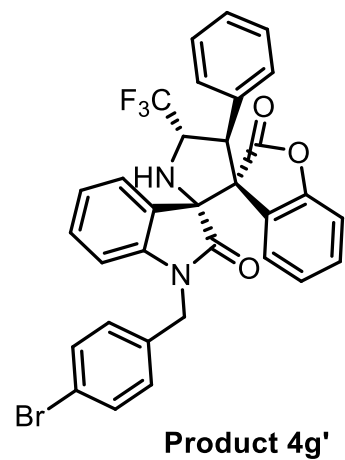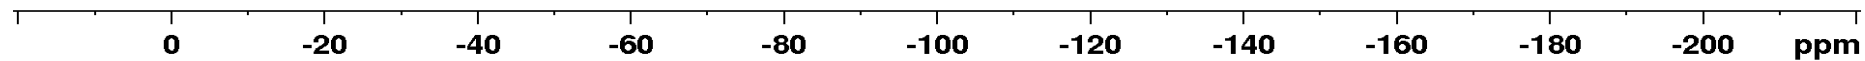

S149

SB-IV-269

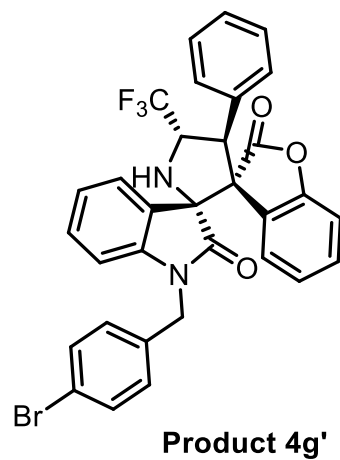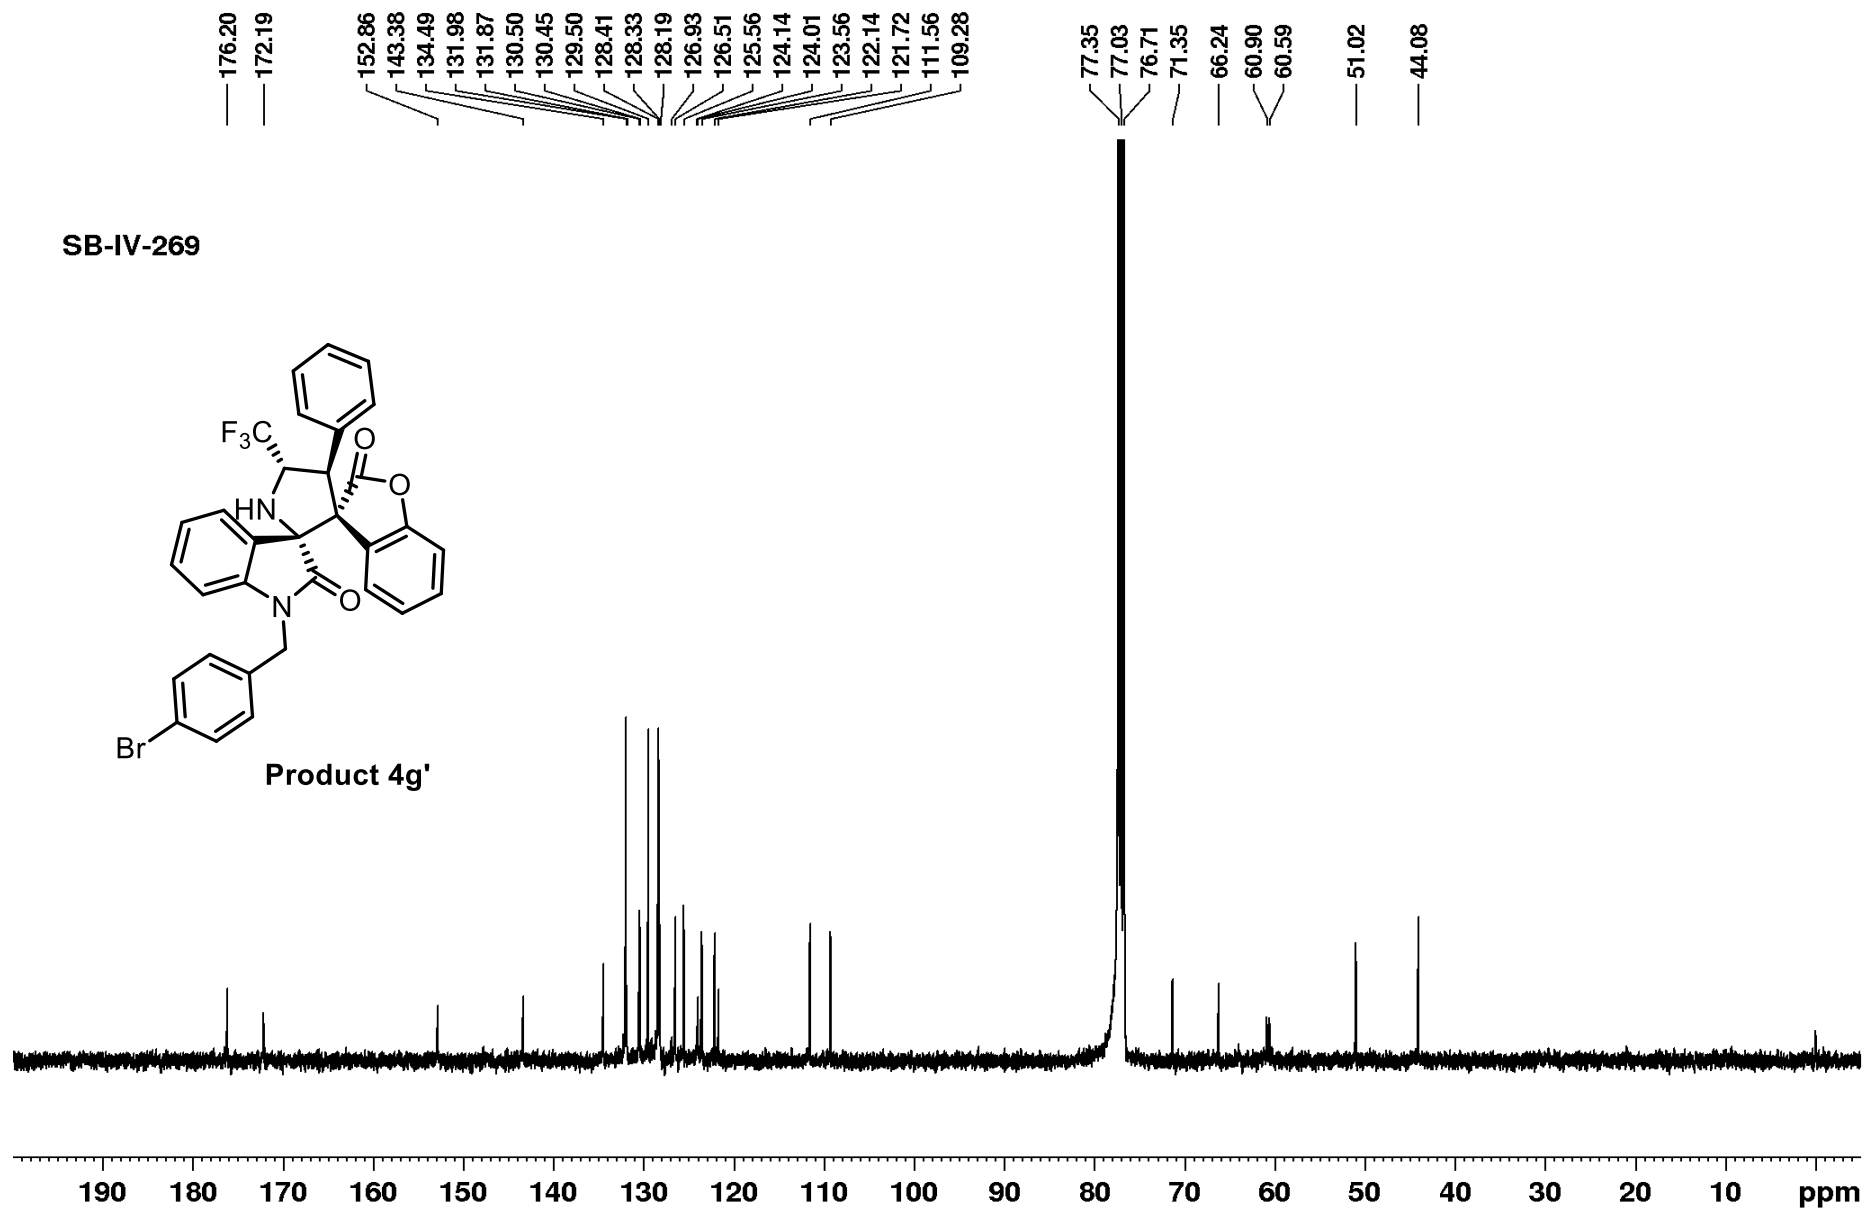

SB-IV-269

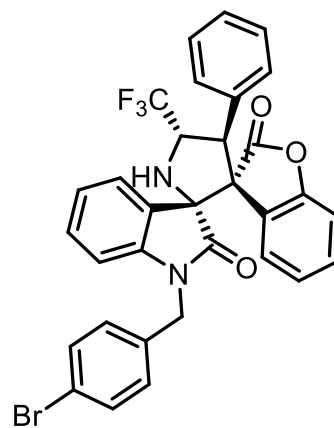

Product 4g'

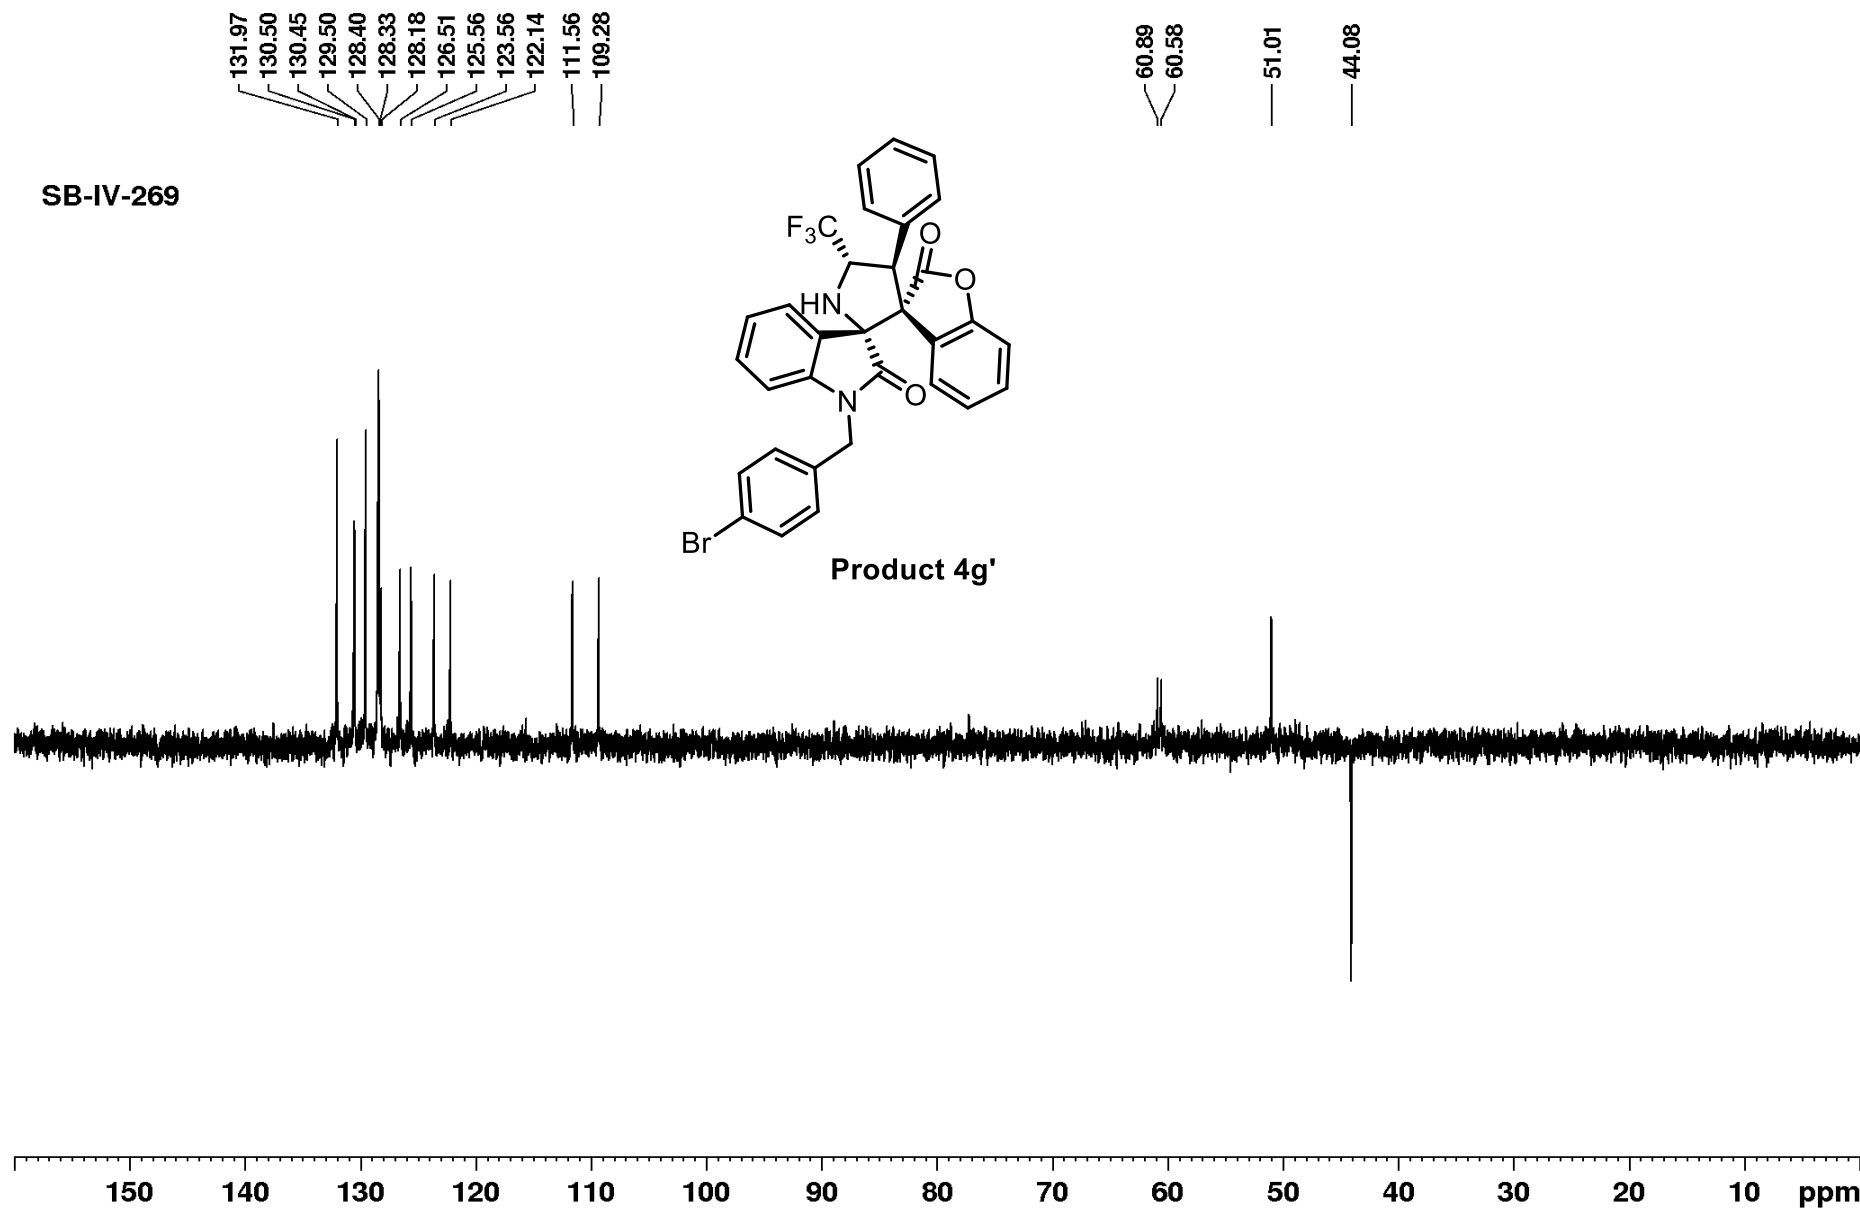

7.480  
7.470  
7.467  
7.461  
7.425  
7.421  
7.405  
7.403  
7.386  
7.383  
7.331  
7.312  
7.282  
7.260  
7.241  
7.228  
7.224  
7.208  
7.205  
7.188  
7.186  
7.169  
7.167  
6.938  
6.920  
6.891  
6.871  
6.777  
6.758  
6.736  
5.883  
5.857  
5.400  
5.361  
5.155  
5.134  
5.117  
5.107  
5.079  
5.062  
4.740  
4.701  
3.106  
3.097  
2.479  
— 1.796

SB-IV-268

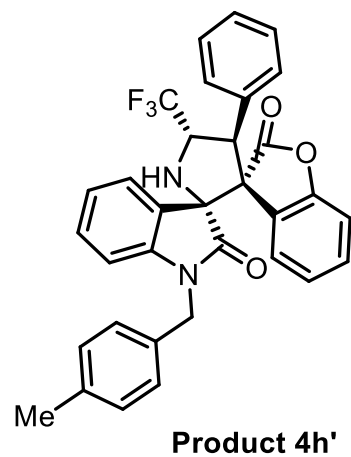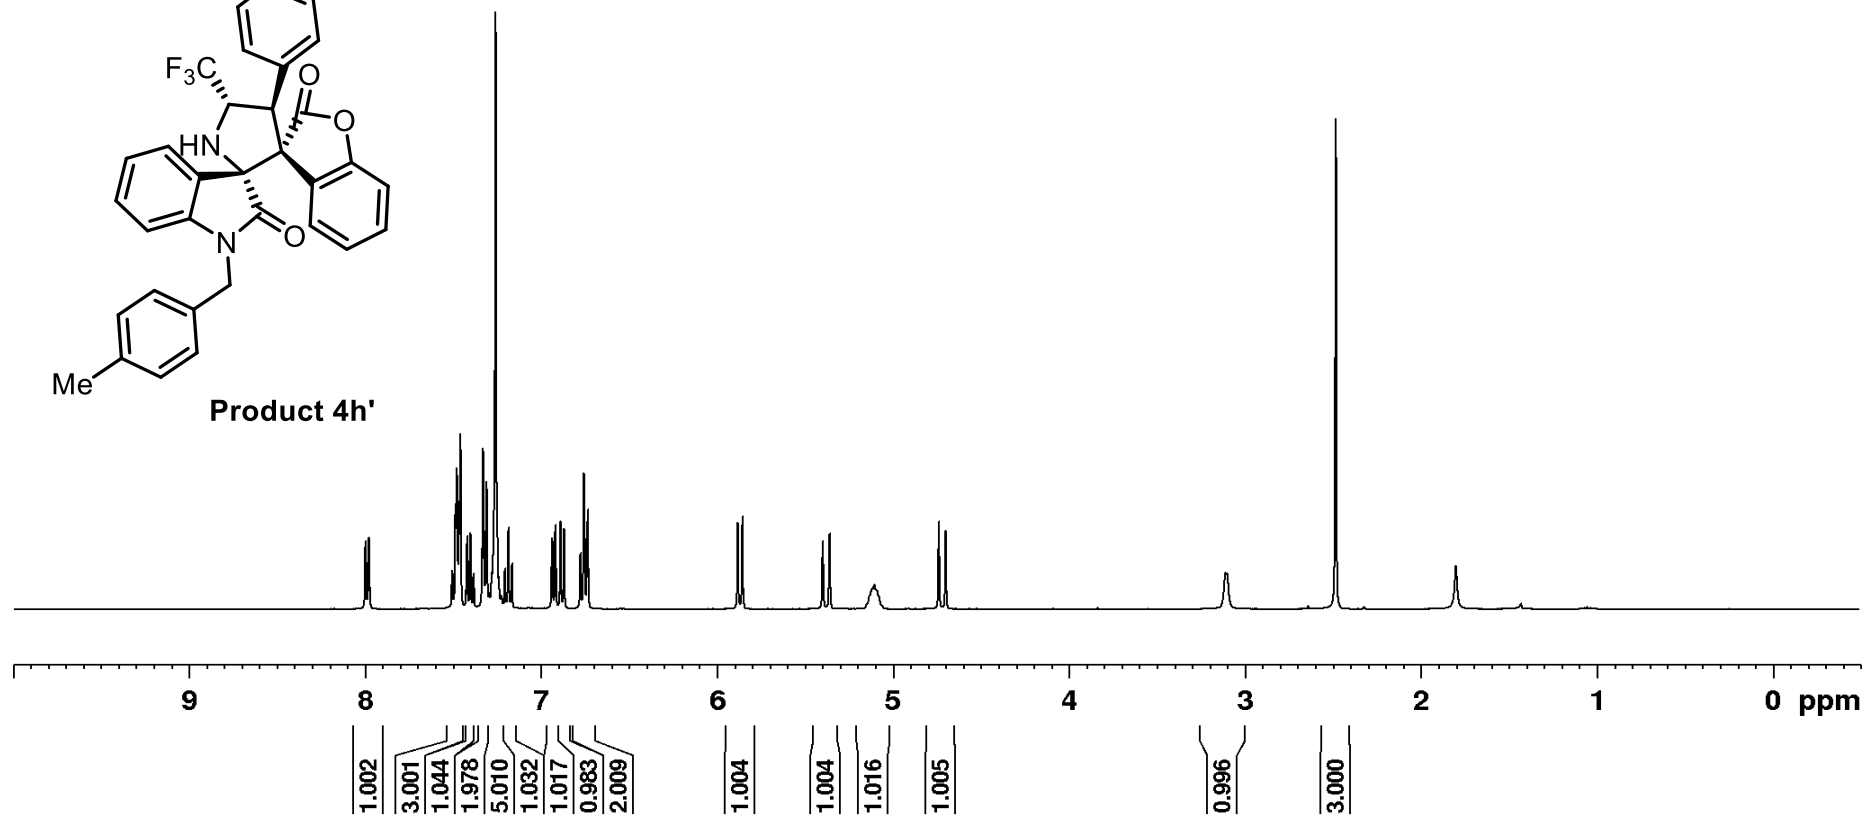

S152

SB-IV-268

—71.52

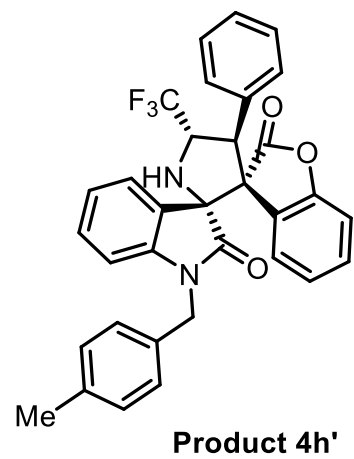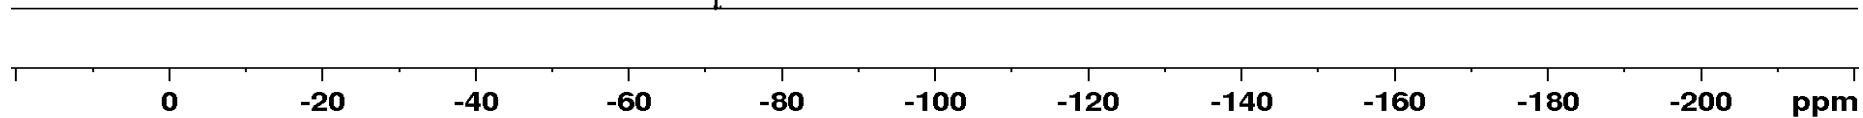

S153

SB-IV-268

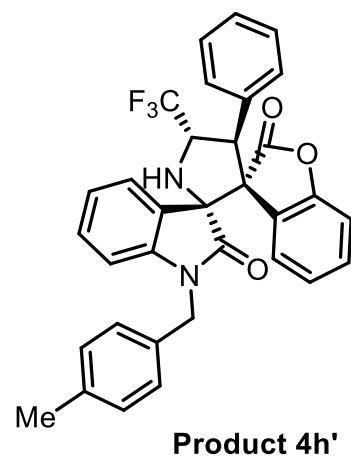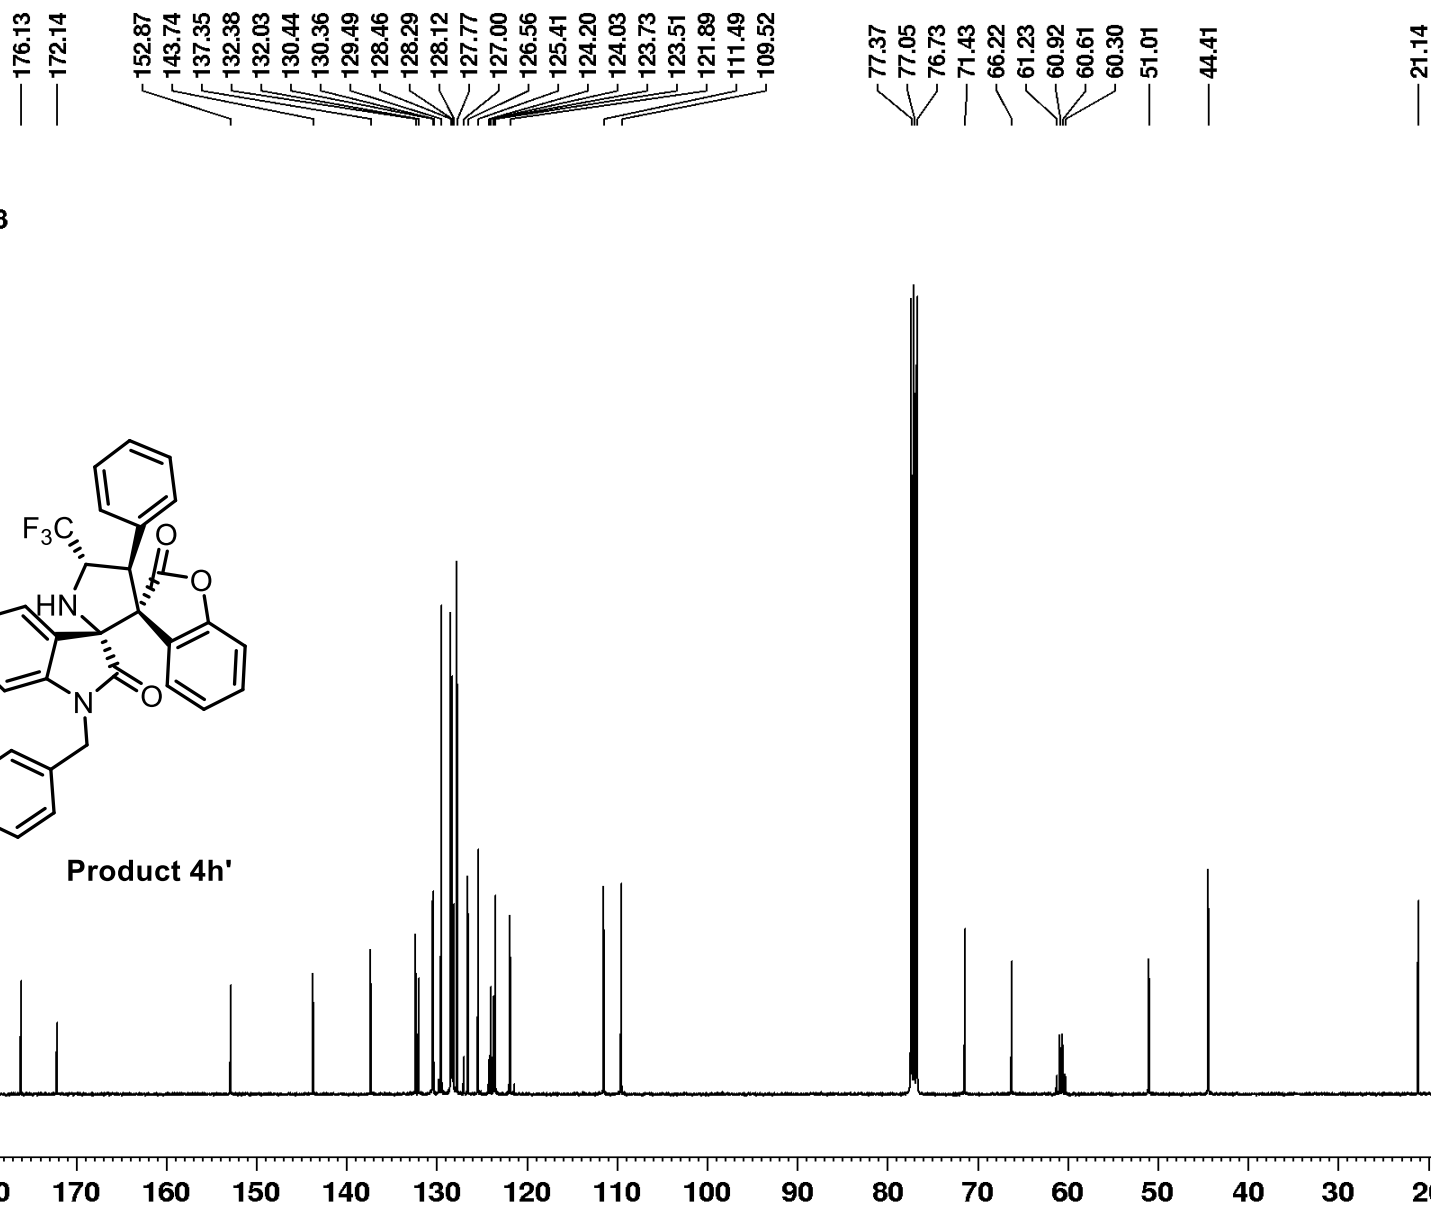

SB-IV-268

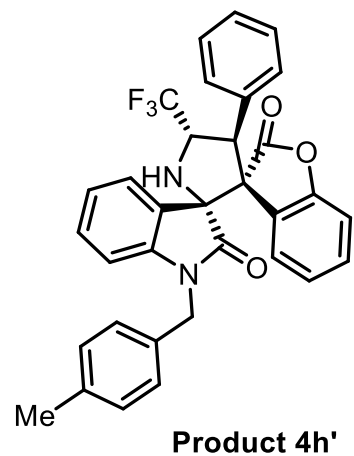

130.45  
130.37  
129.49  
128.46  
128.30  
128.13  
127.77  
126.55  
125.41  
123.52  
121.90  
111.49  
109.53

61.22  
60.91  
60.60  
60.29  
51.01  
44.41

21.15

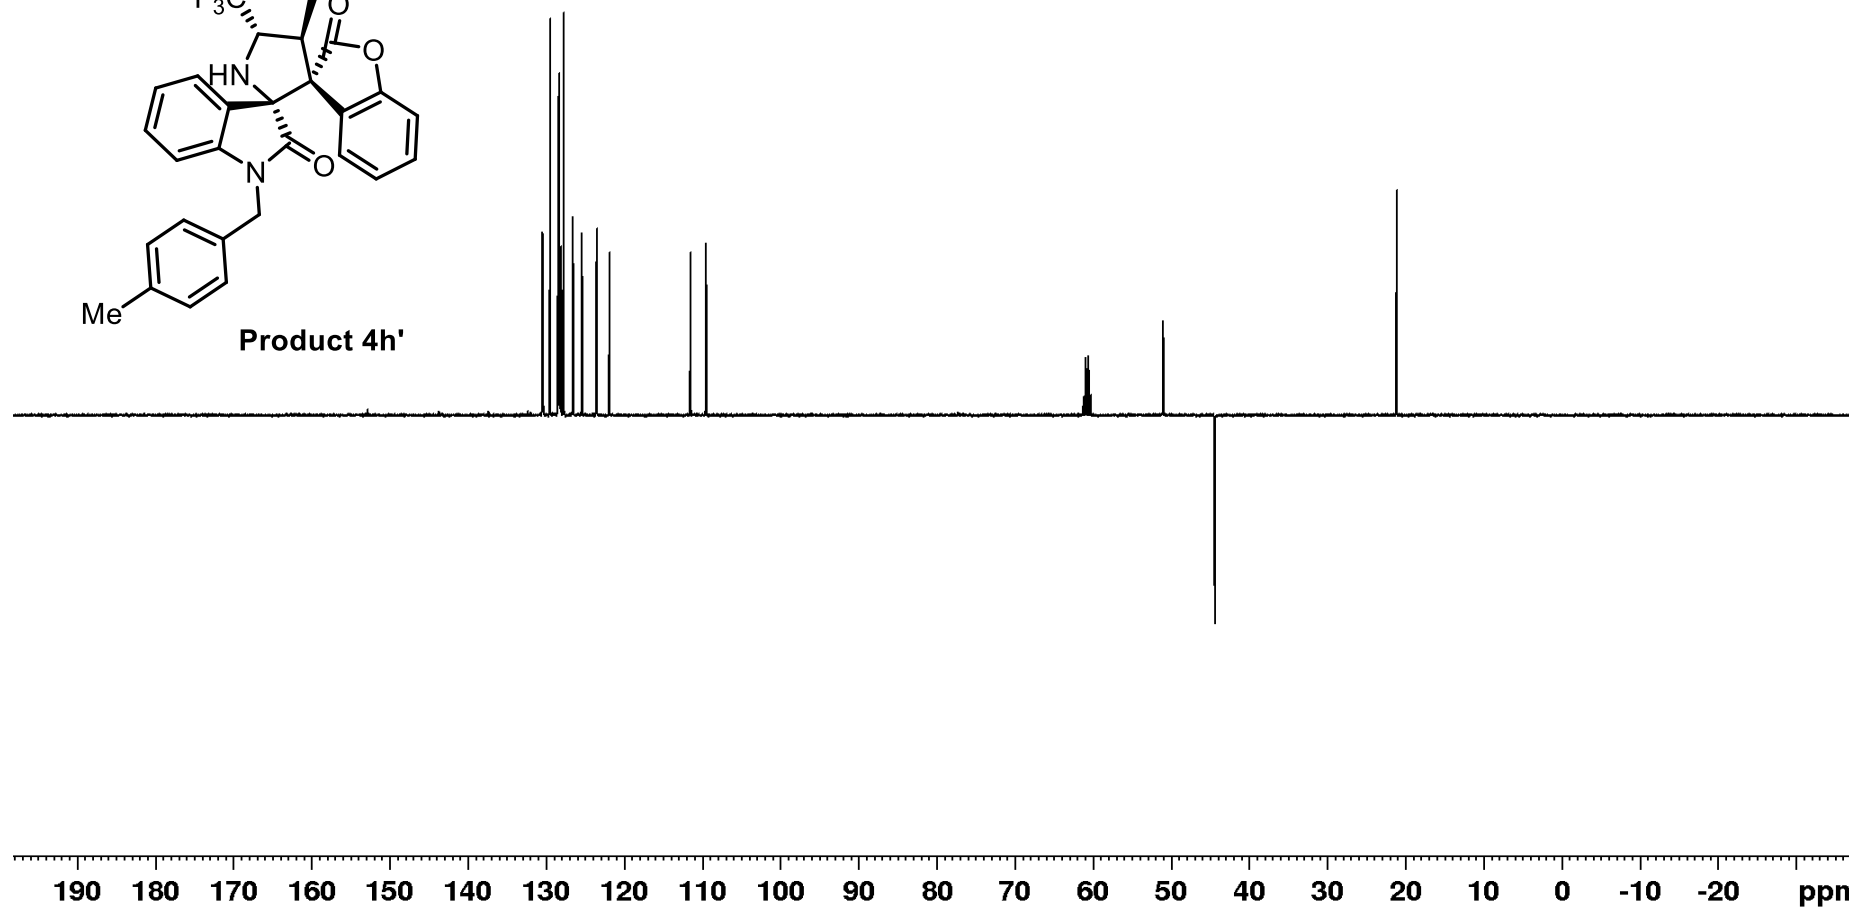

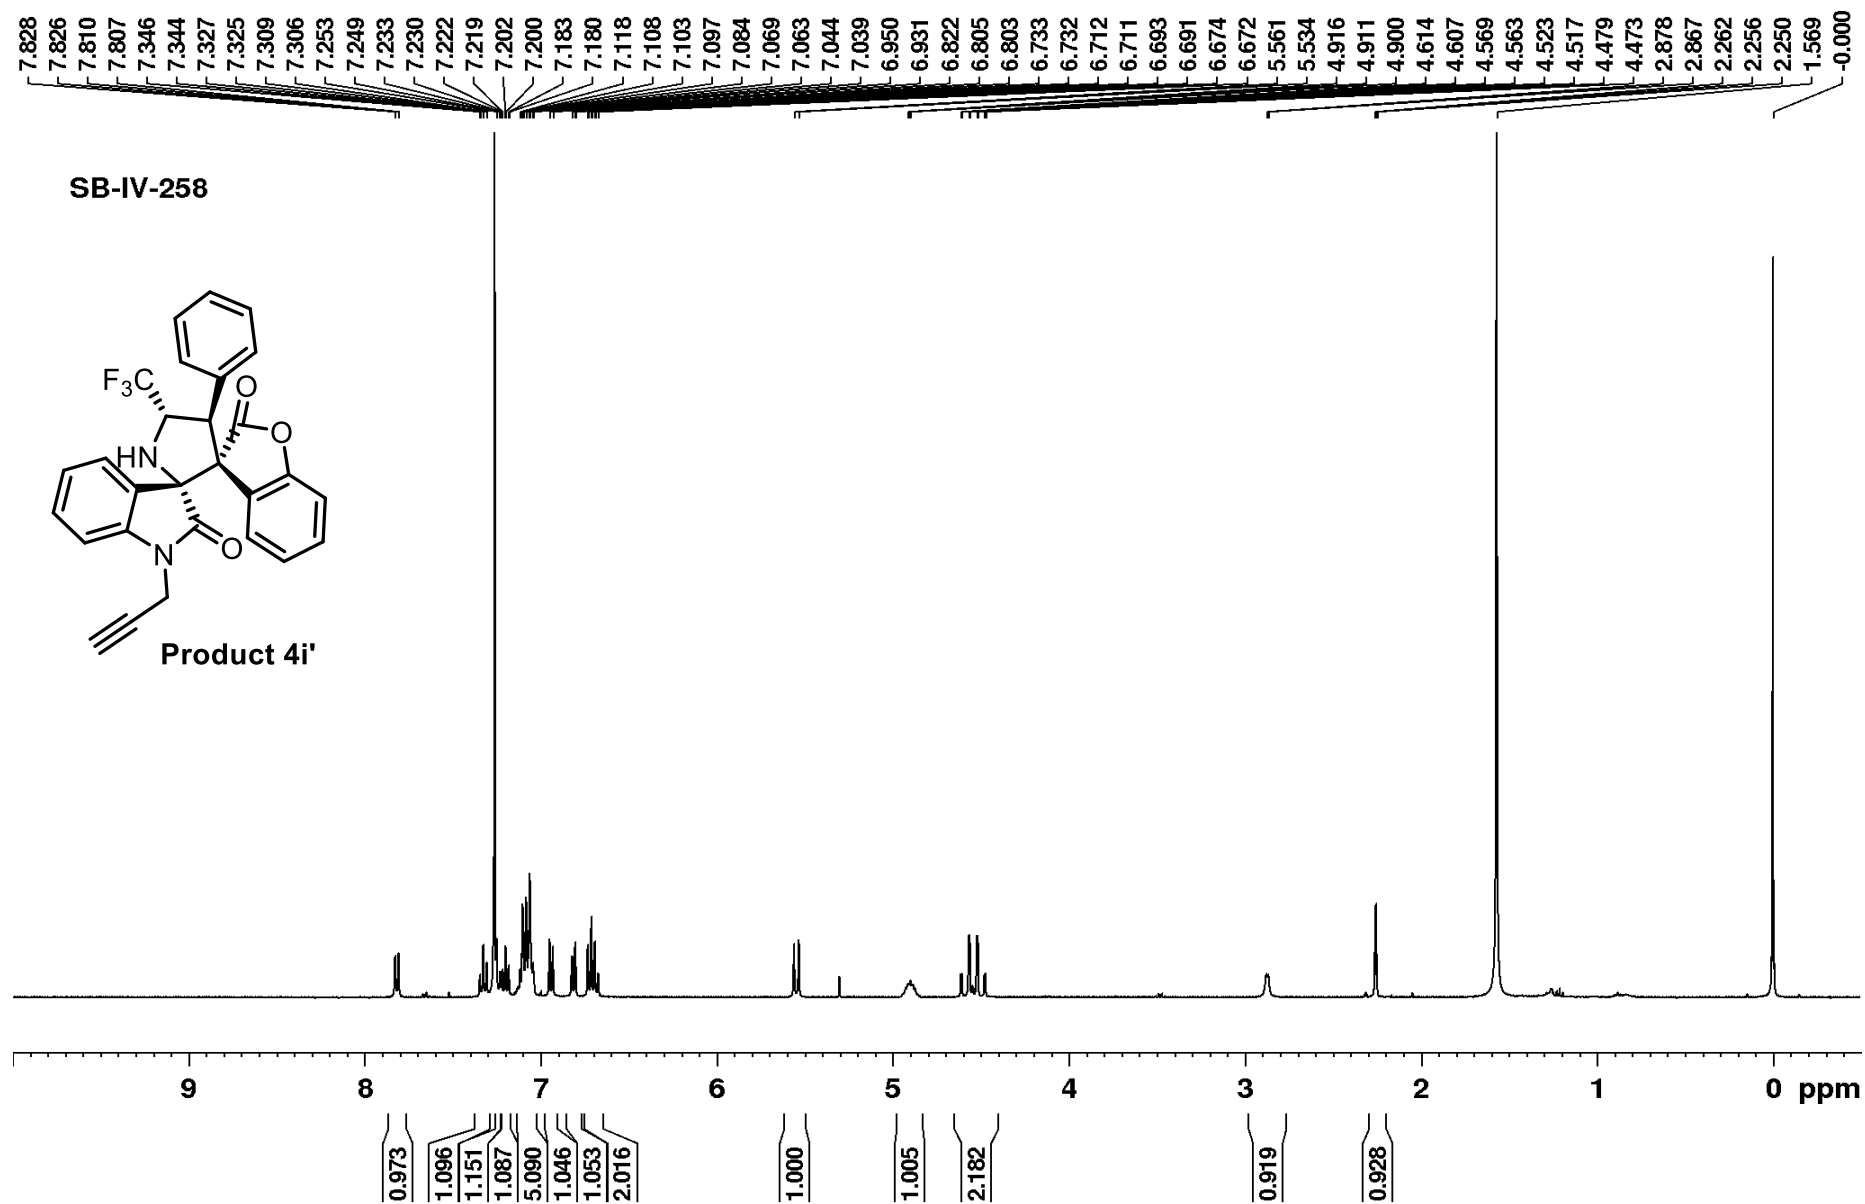

S156



SB-IV-258

— -71.58

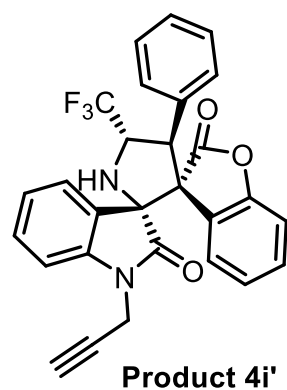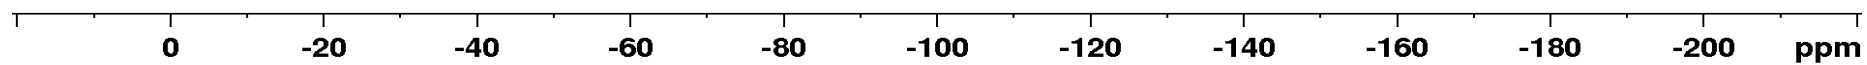

S157

SB-IV-258

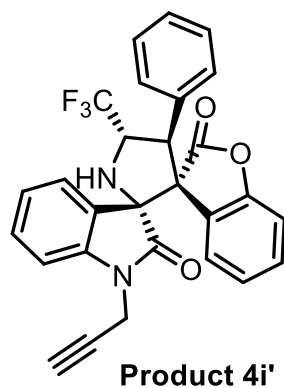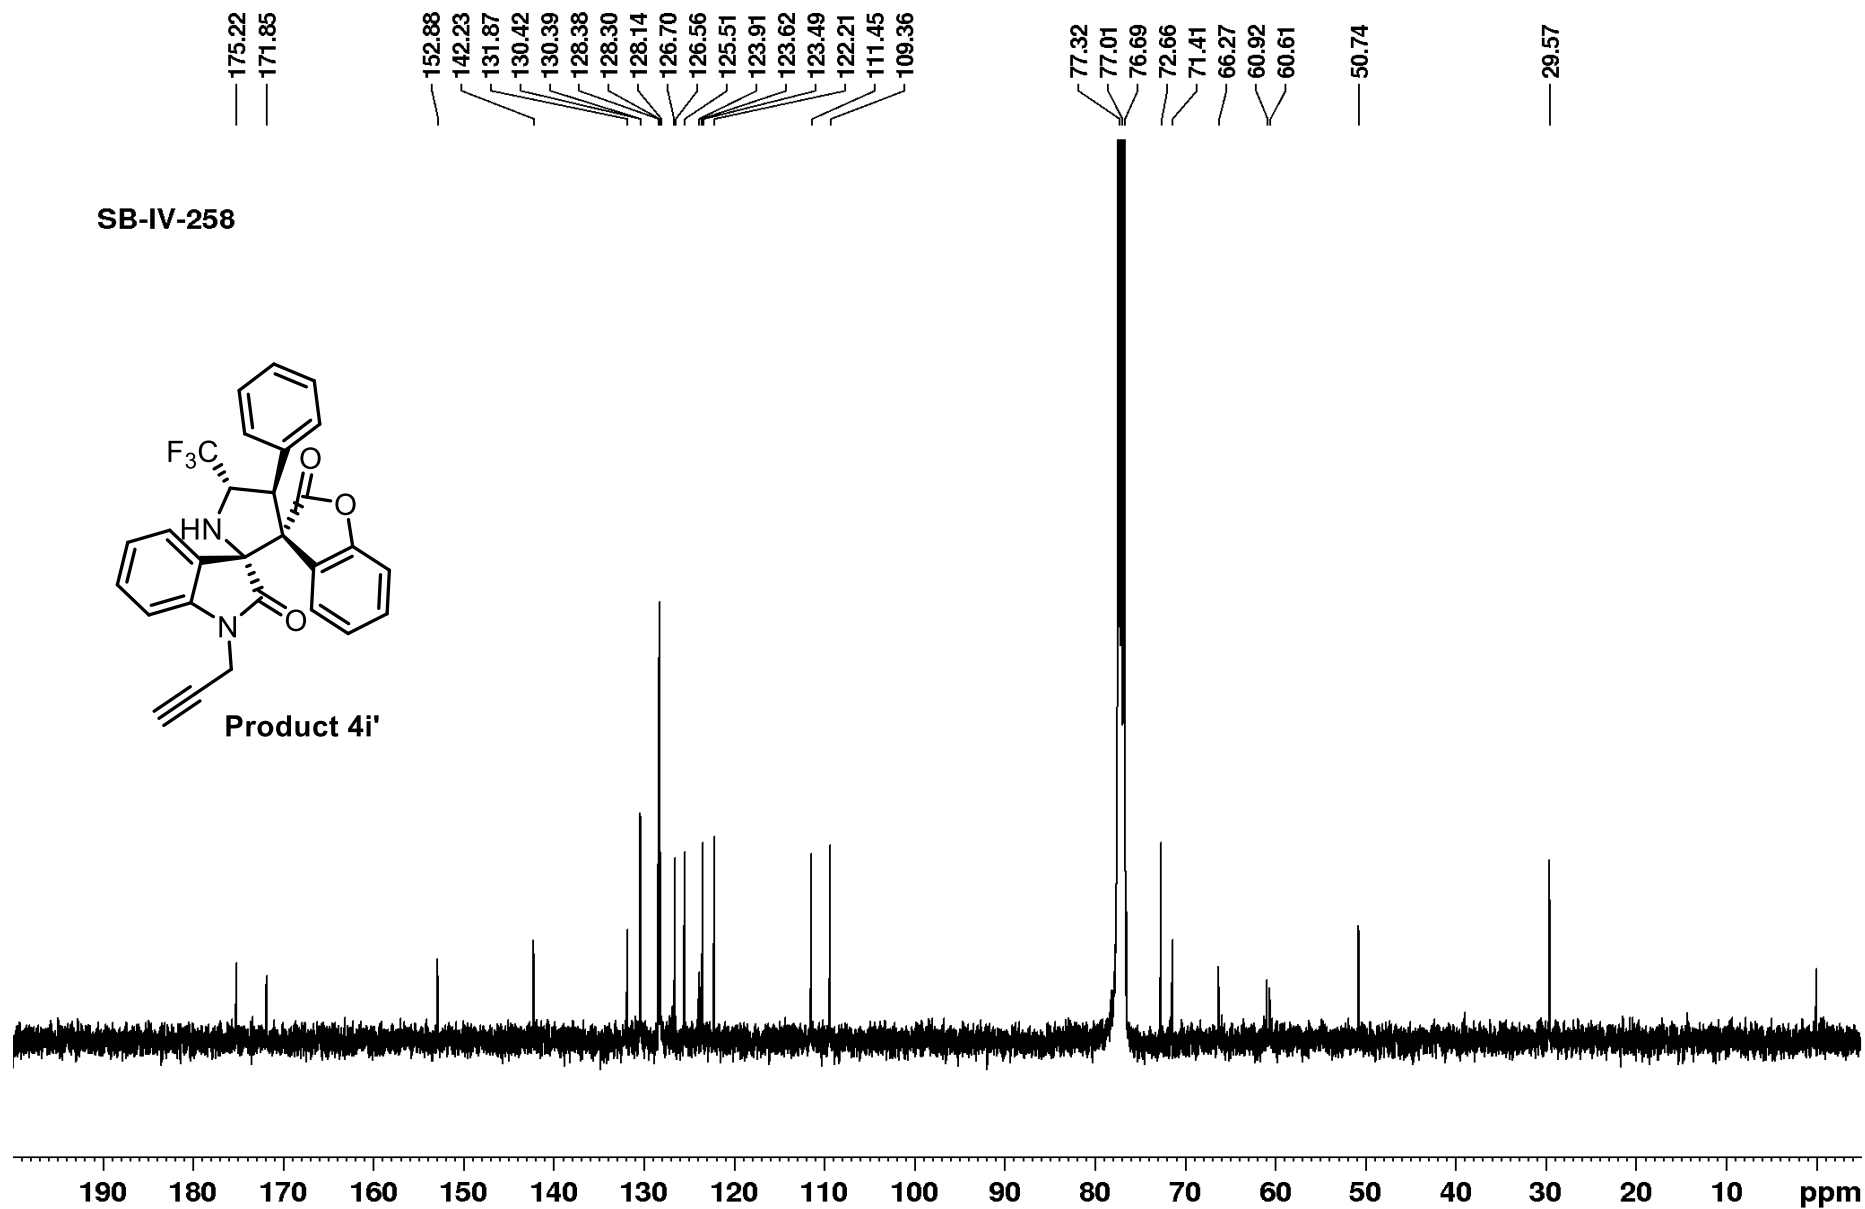

SB-IV-258

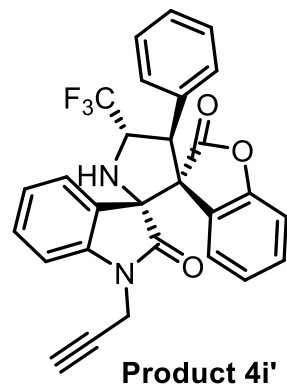

130.43  
128.38  
128.31  
128.14  
126.56  
125.51  
123.51  
122.22  
111.46  
109.37

77.22

61.20  
60.90  
60.59  
60.28  
50.73

29.56

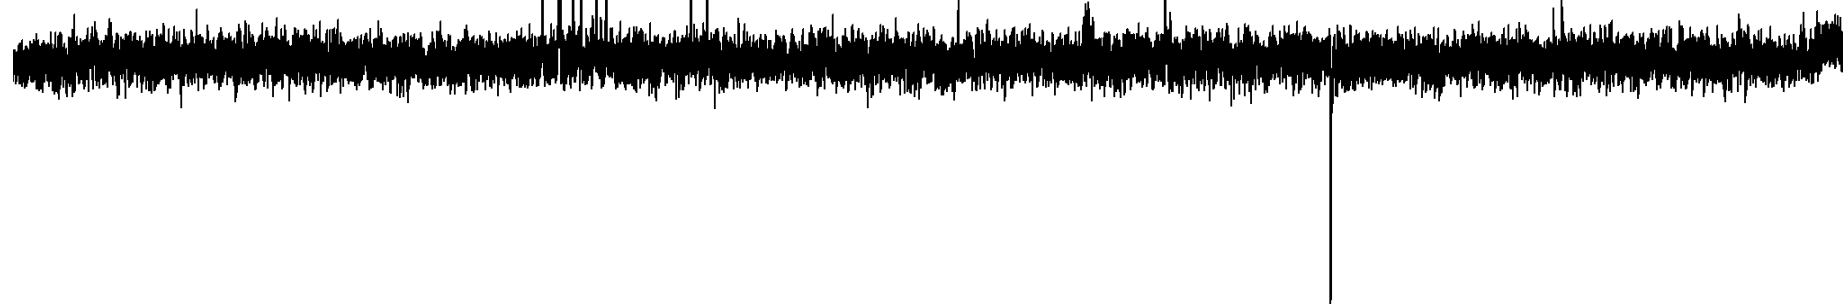

190 180 170 160 150 140 130 120 110 100 90 80 70 60 50 40 30 20 10 0 -10 -20 ppm

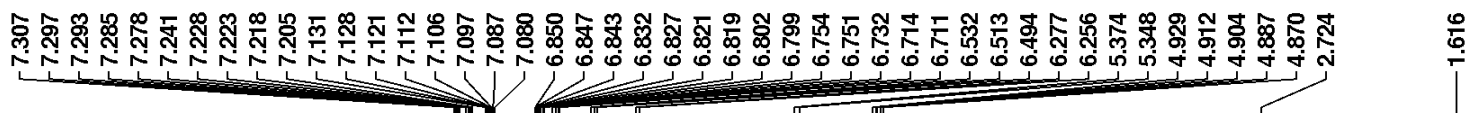

SB-IV-271

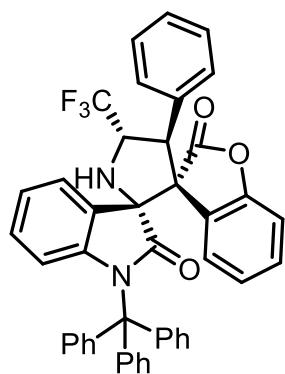

Product 4j'

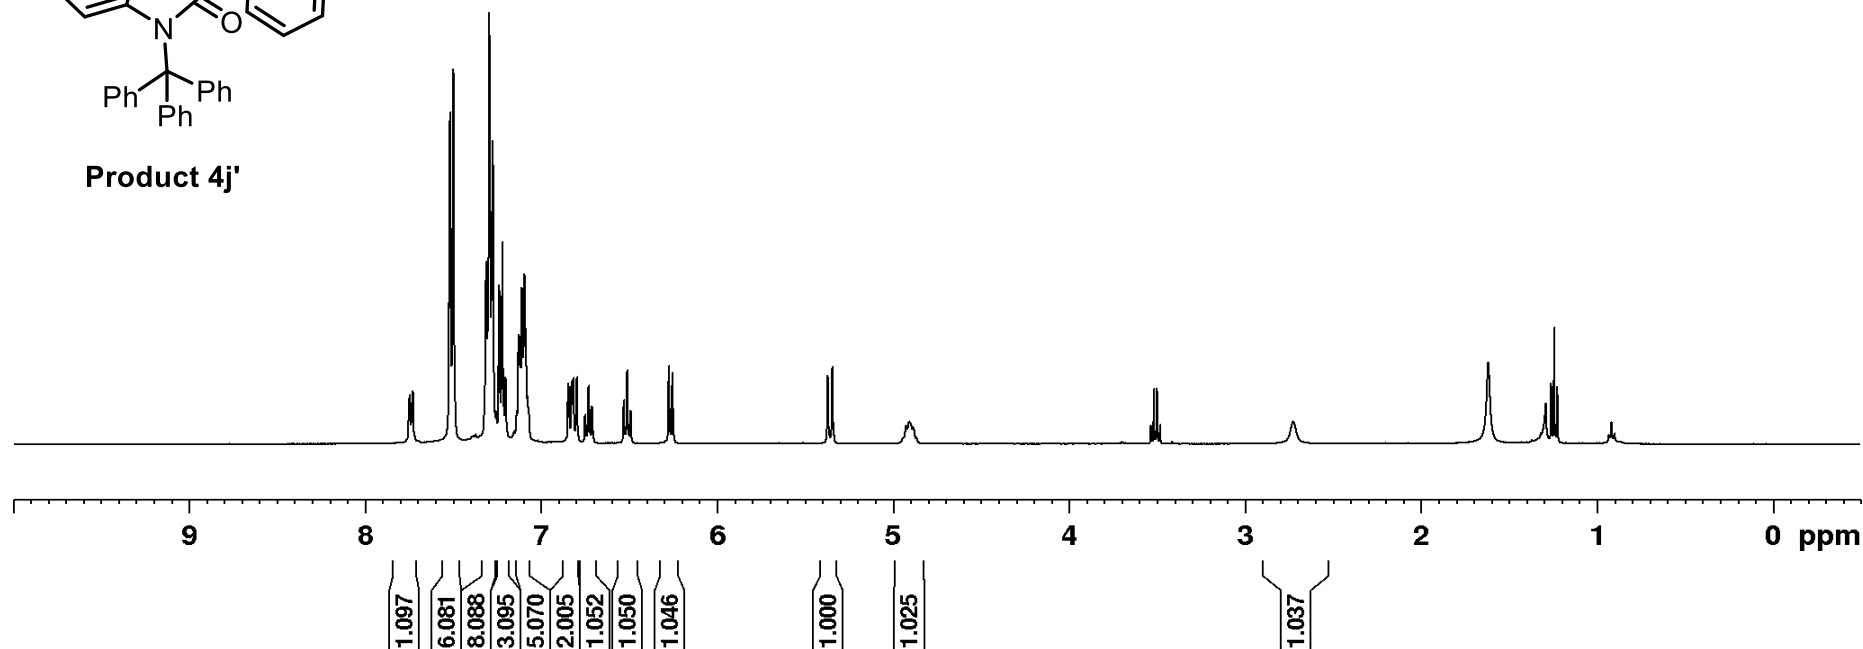

SB-IV-271

— -70.84

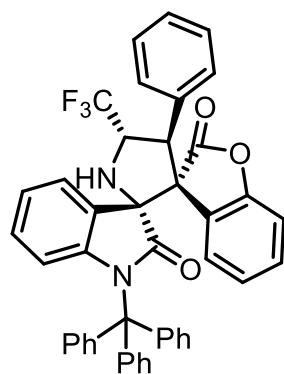

Product 4j'

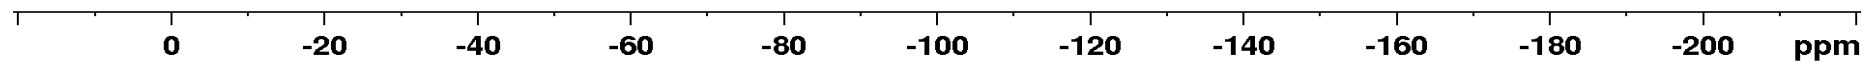

S161

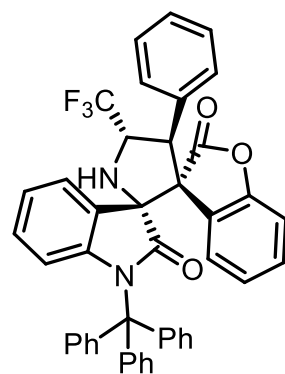

**Product 4j'**

**SB-IV-271**

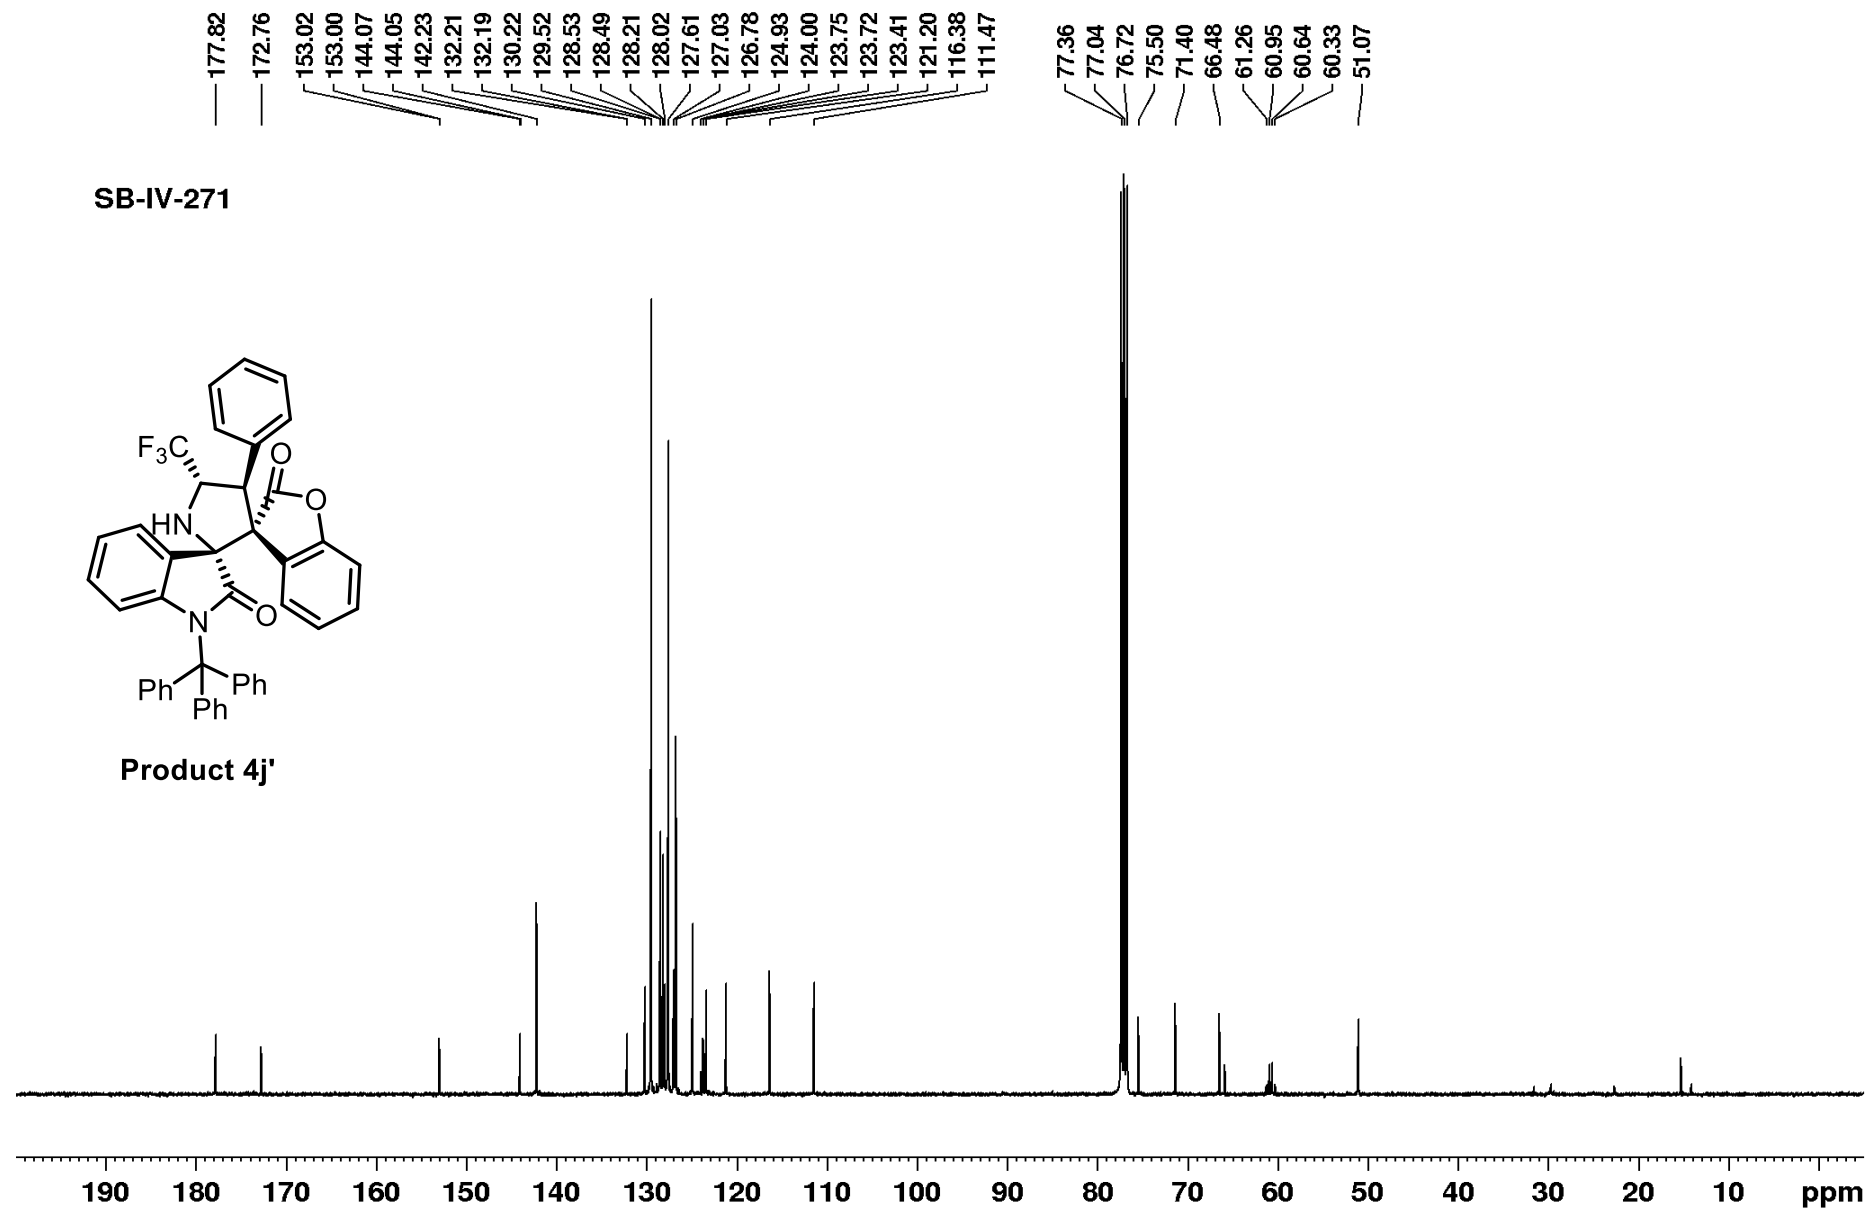

SB-IV-271

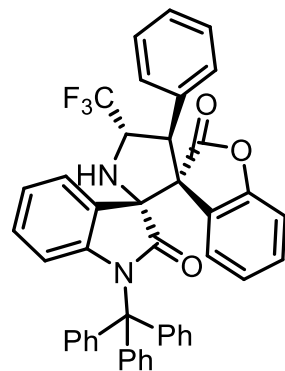

Product 4j'

130.22  
129.52  
128.53  
128.49  
128.22  
128.02  
127.61  
127.03  
126.78  
124.93  
123.42  
121.21  
116.38  
111.47

61.24  
60.94  
60.63  
60.32  
51.07

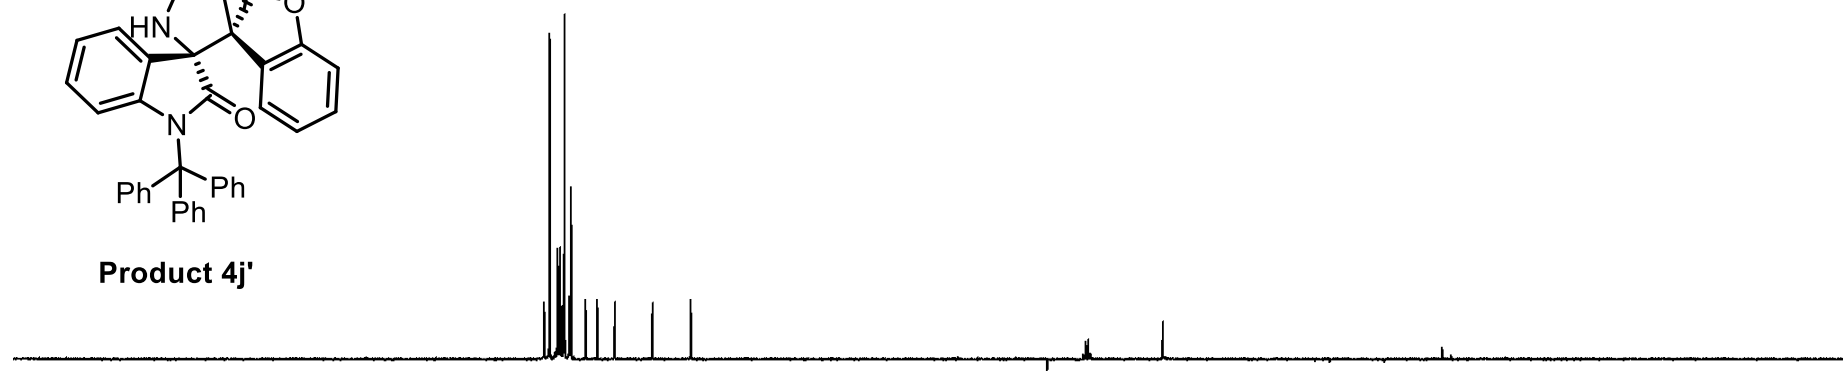

190 180 170 160 150 140 130 120 110 100 90 80 70 60 50 40 30 20 10 0 -10 -20 ppm

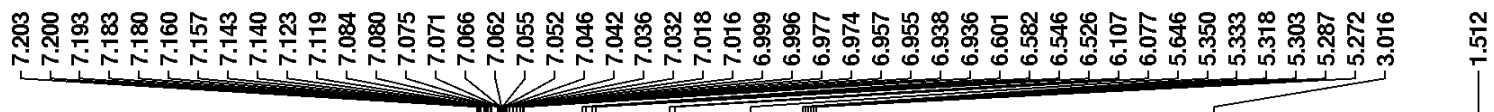

SB-IV-280

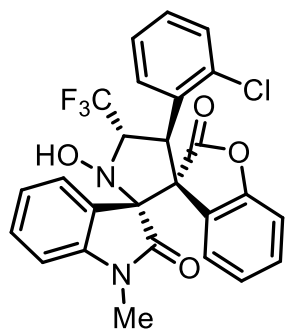

Product 5d

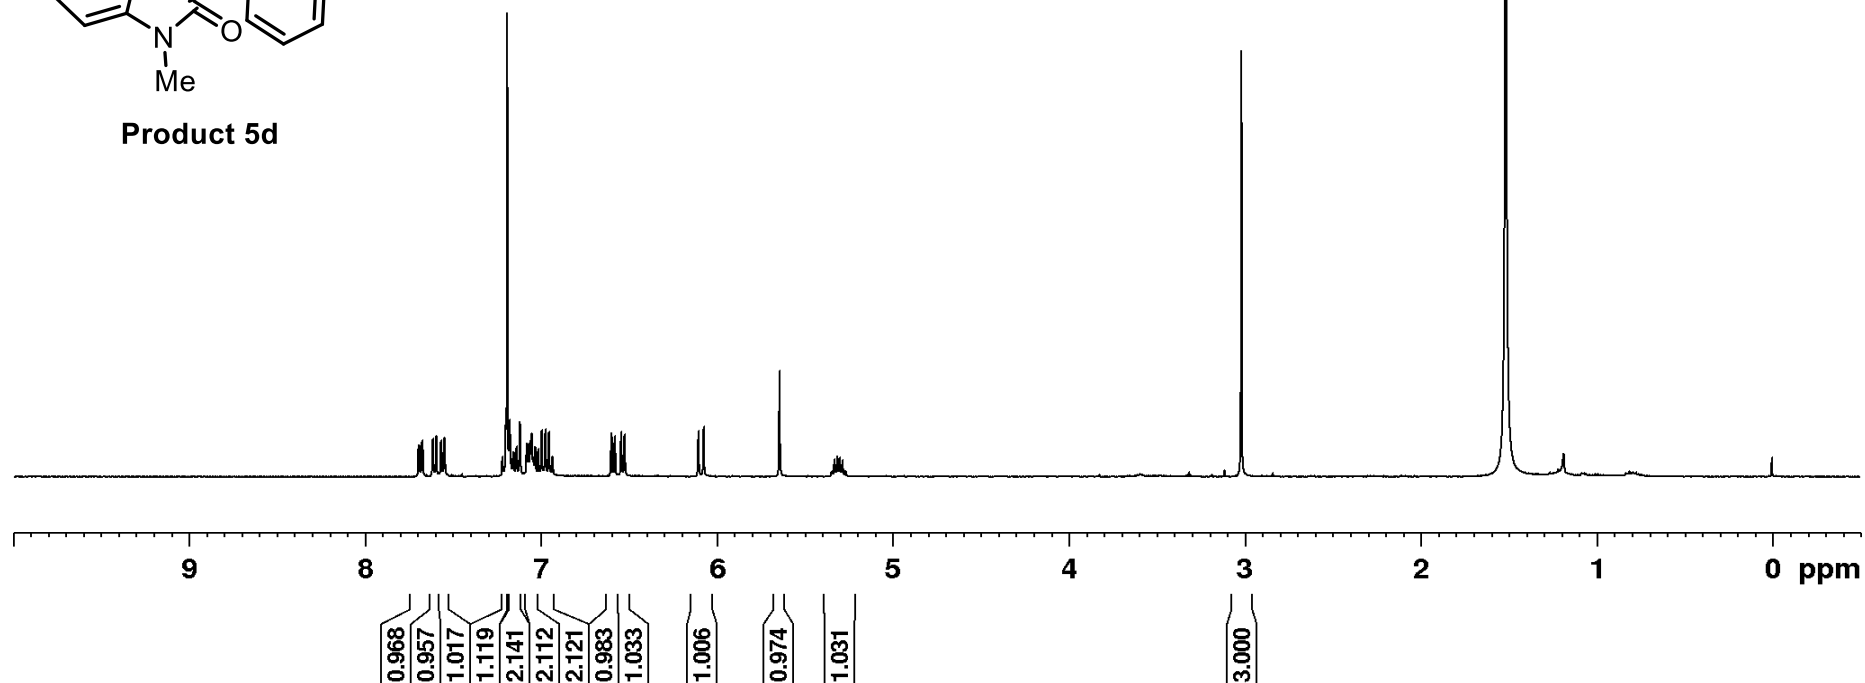



SB-IV-280

— -70.41

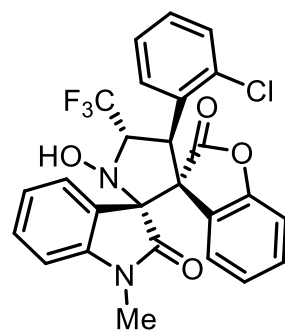

Product 5d

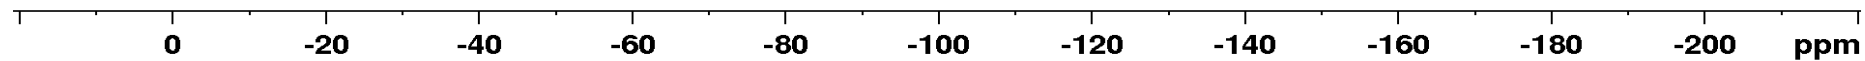

S165

SB-IV-280

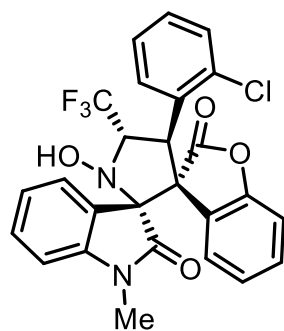

Product 5d

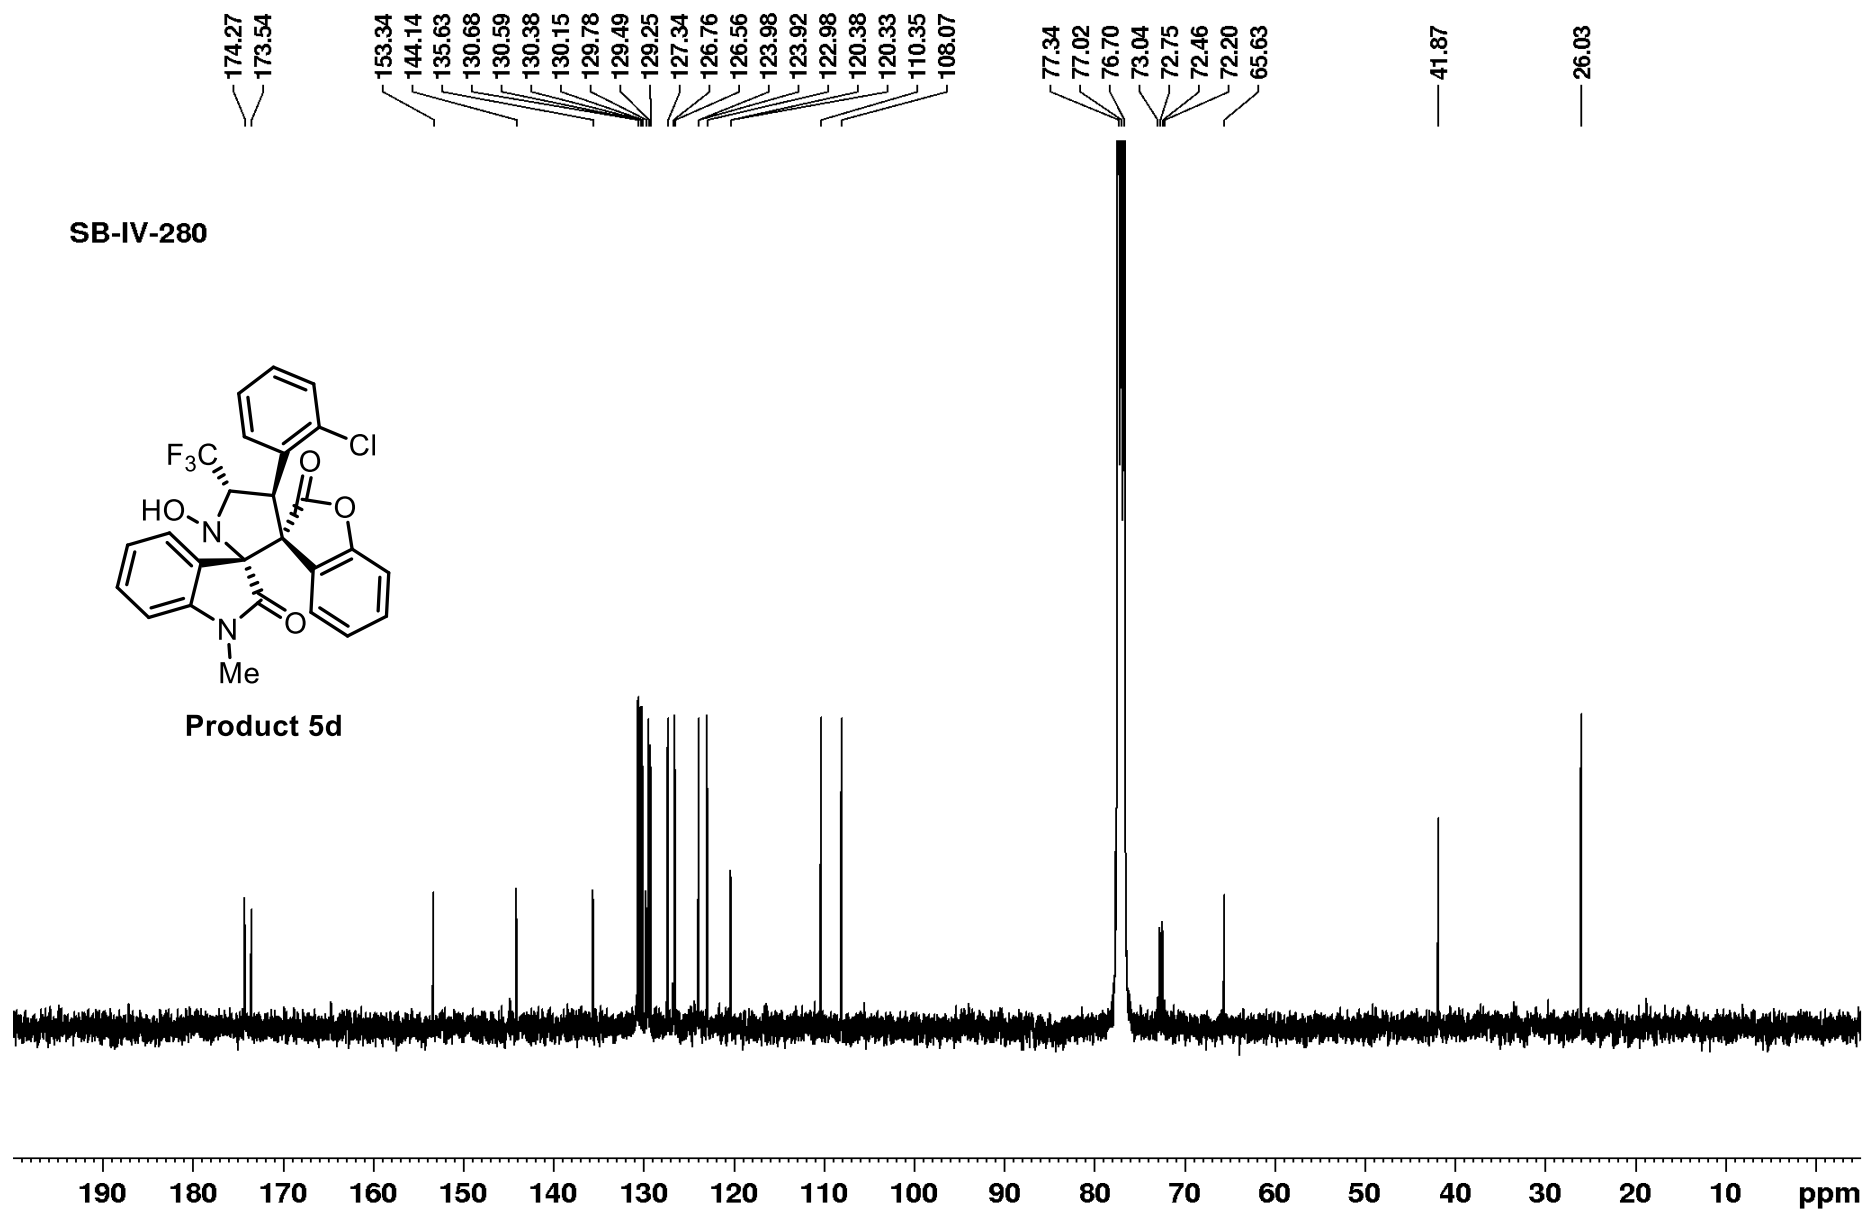

SB-IV-280

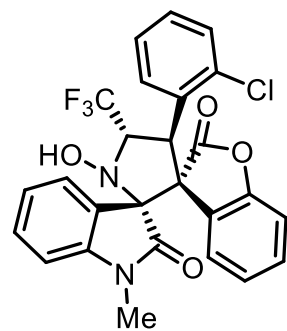

Product 5d

130.69  
130.59  
130.39  
130.16  
129.49  
129.25  
127.35  
126.55  
123.92  
122.98  
110.36  
108.08

77.23  
73.02  
72.74  
72.45  
72.16

41.86

26.04

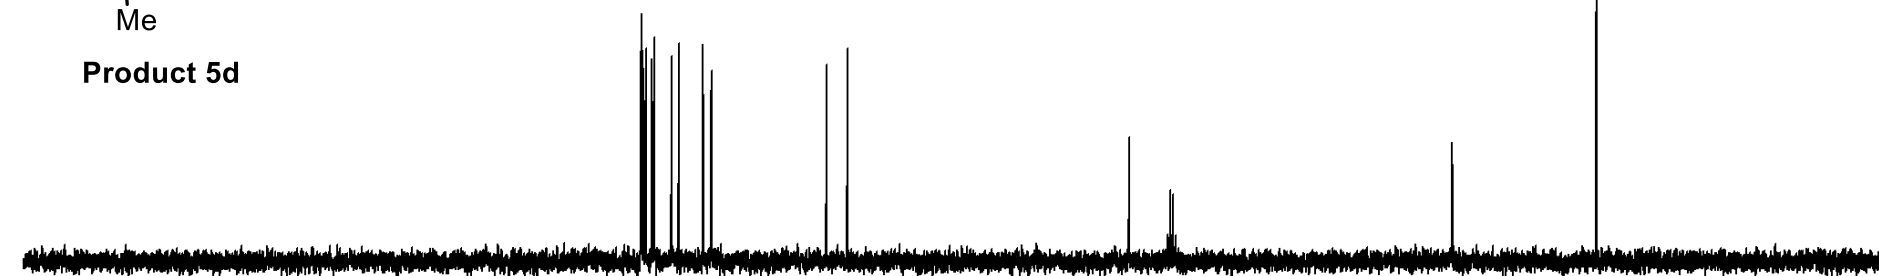

190 180 170 160 150 140 130 120 110 100 90 80 70 60 50 40 30 20 10 ppm

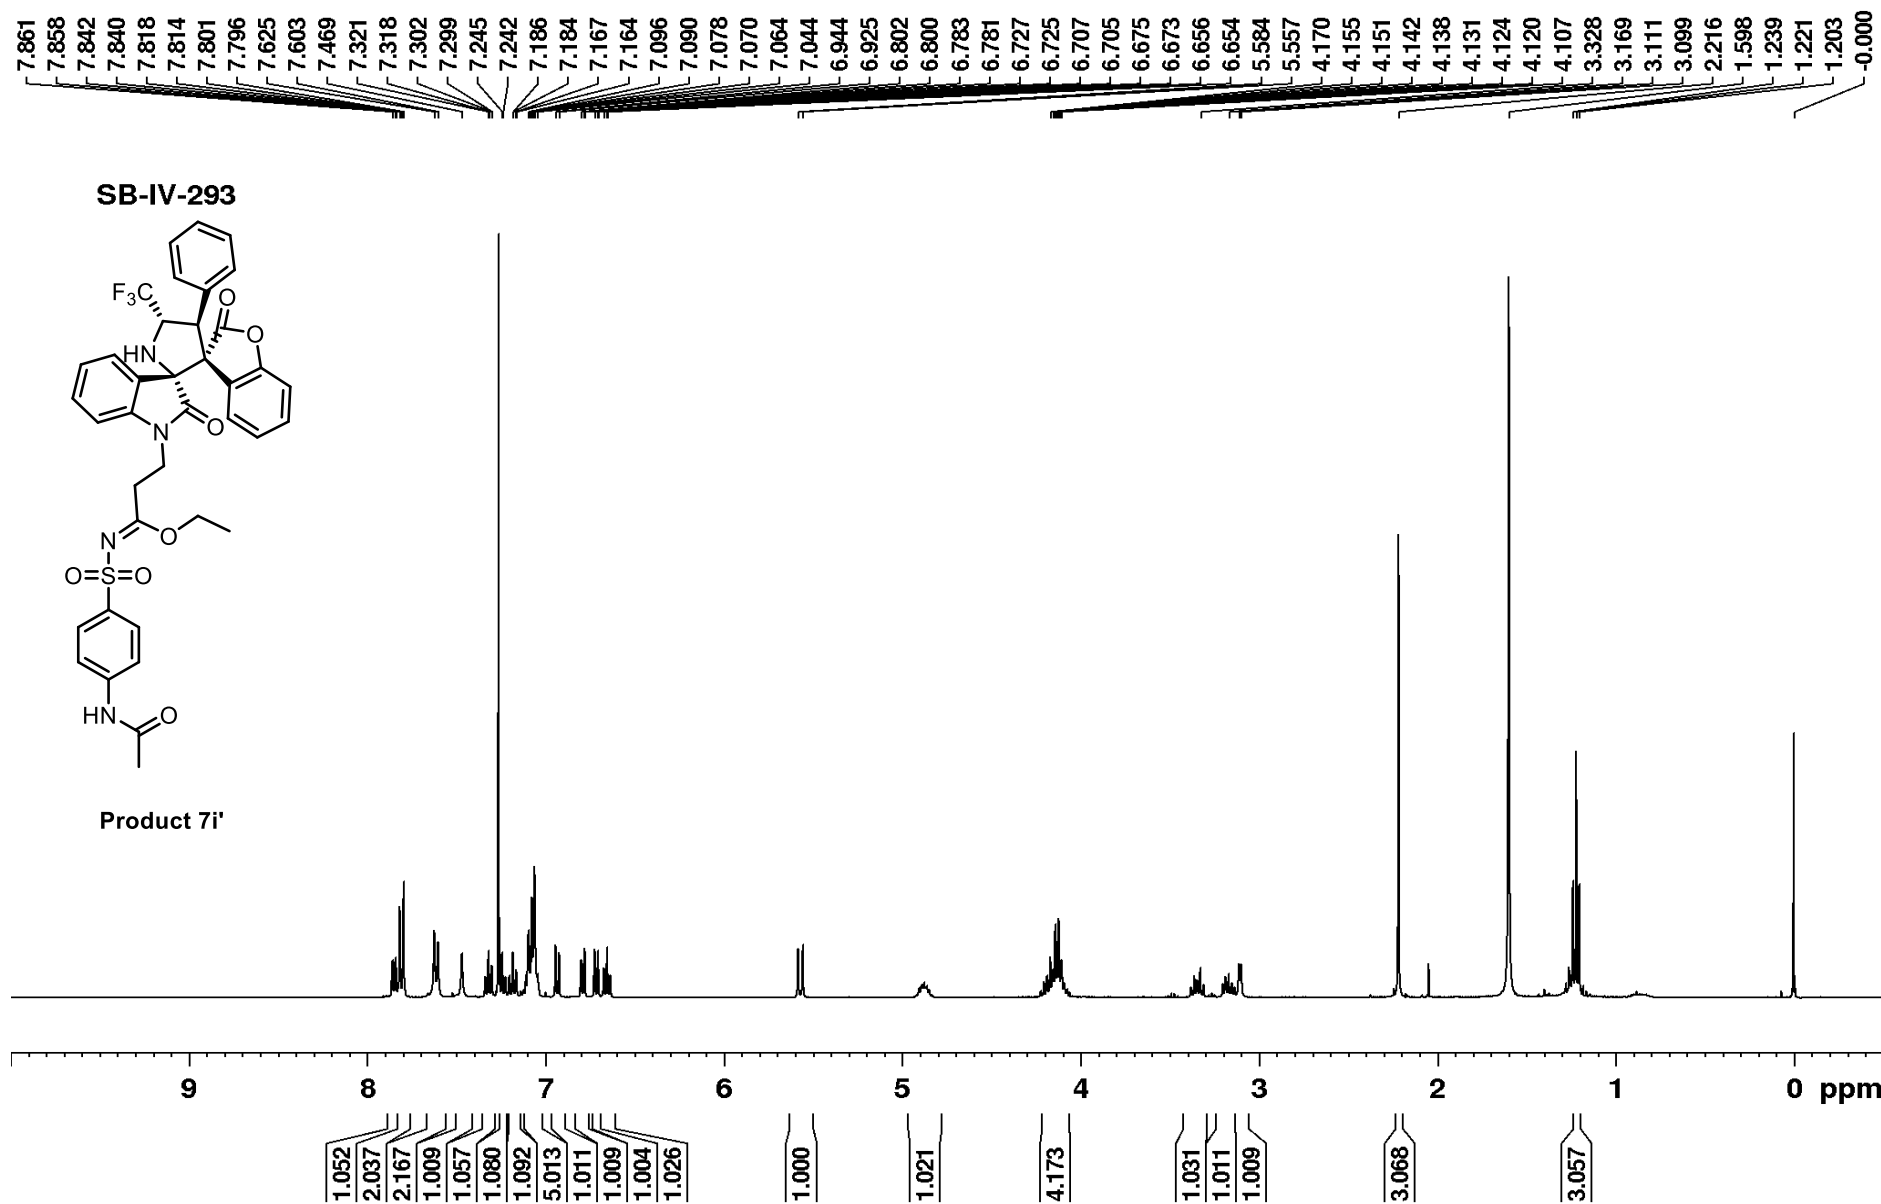

SB-IV-293

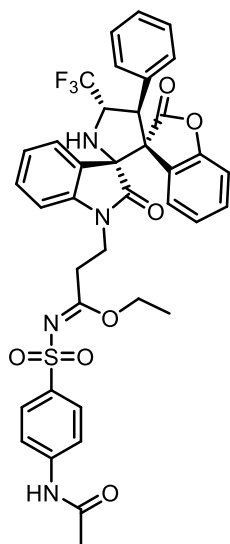

Product 7i'

—71.41

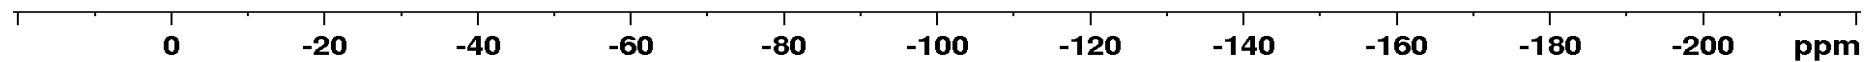

S169

SB-IV-293

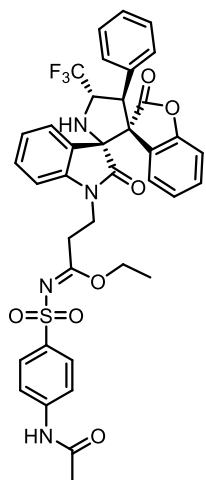

Product 7i'

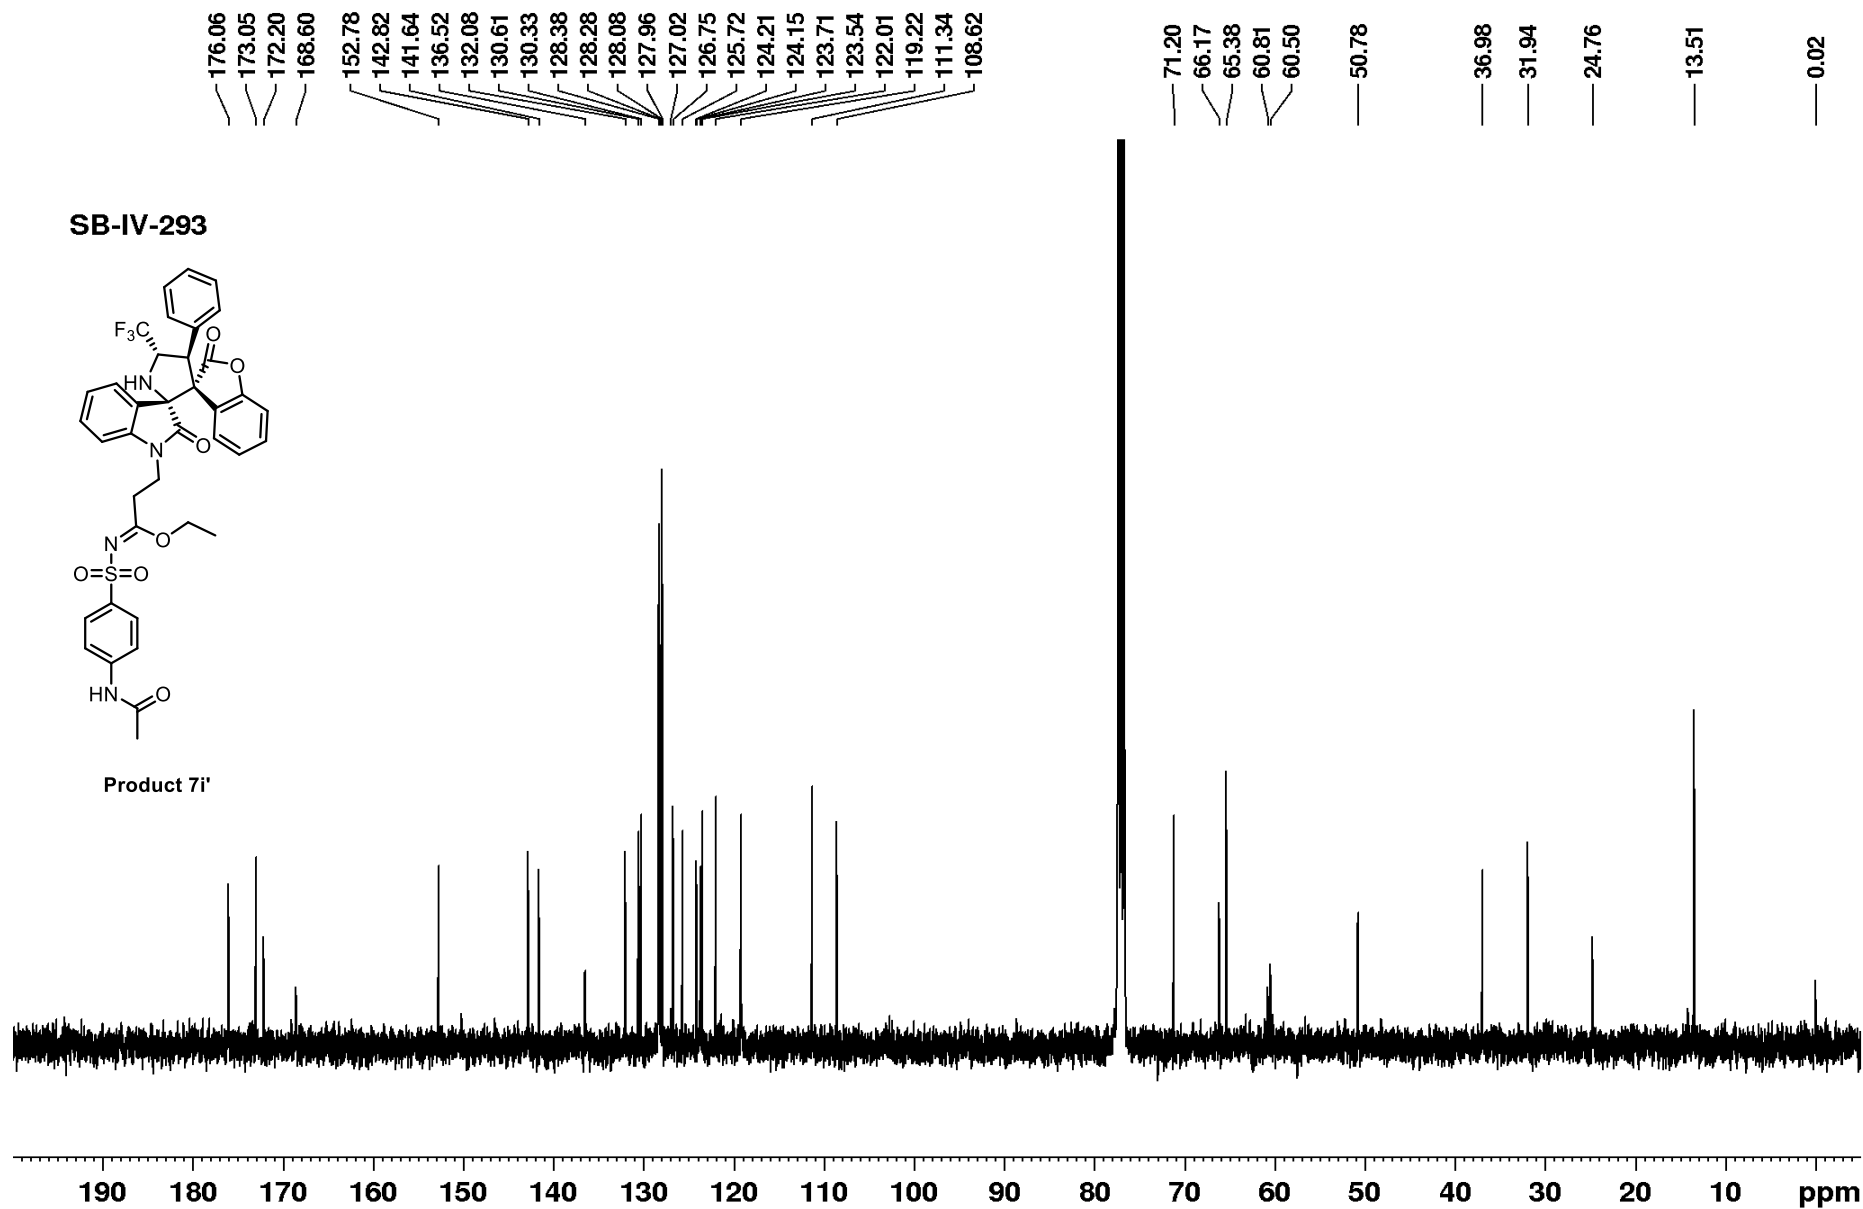

SB-IV-293

130.61  
130.33  
128.38  
128.28  
128.08  
127.96  
126.75  
125.72  
123.54  
122.01  
119.22  
111.35  
108.62

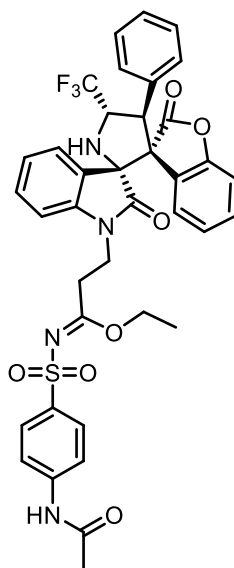

Product 7i'

77.24

65.38

60.81

60.50

50.78

36.98

31.95

24.77

13.51

150

140

130

120

110

100

90

80

70

60

50

40

30

20

10

ppm

S171

## HPLC of racemic **4a**

SB-IV-227 Racemic T3 E:\CUTN\MSP-LAB\Bharani\Ket-cum project HPLC\230 4-Br\SB-IV-227 Racemic T3.lcd

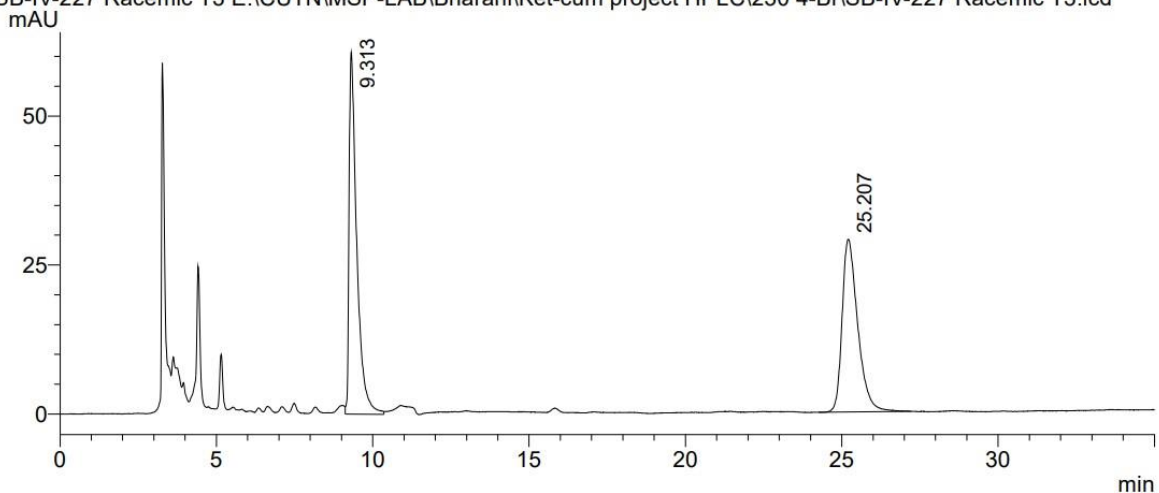

PDA Ch1 254nm

| Peak # | Ret. Time (min) | Area    | Height | Area%   |
|--------|-----------------|---------|--------|---------|
| 1      | 9.313           | 1040619 | 60705  | 50.896  |
| 2      | 25.207          | 1003985 | 28972  | 49.104  |
| Total  |                 | 2044604 | 89677  | 100.000 |

## HPLC of chiral **4a**: 90:10 *er*

SB-IV-230-C E:\CUTN\MSP-LAB\Bharani\Ket-cum project HPLC\230 4-Br\SB-IV-230-C.lcd

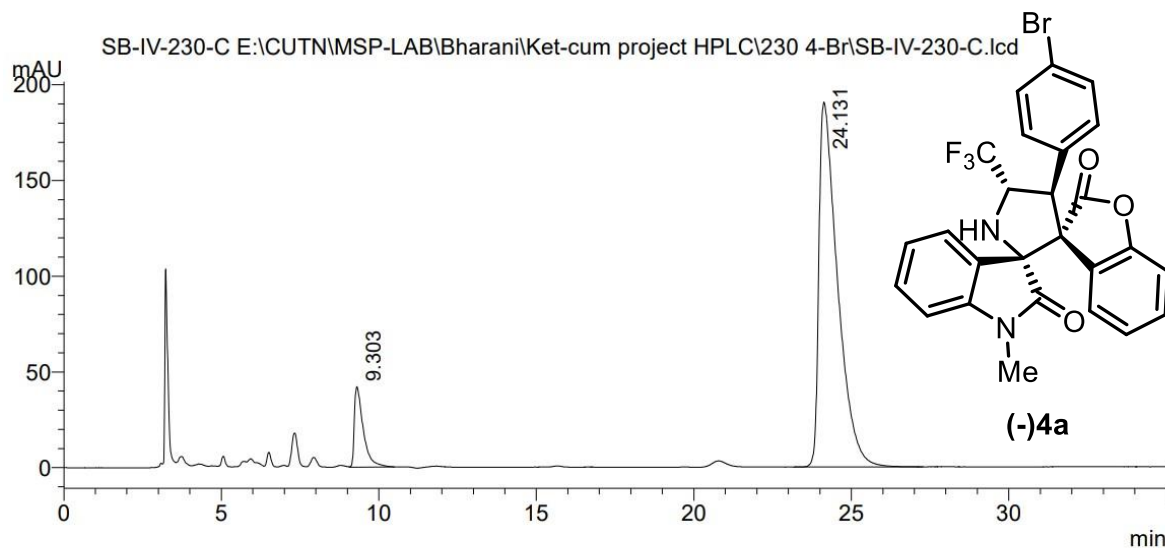

PDA Ch1 254nm

| Peak # | Ret. Time (min) | Area    | Height | Area%   |
|--------|-----------------|---------|--------|---------|
| 1      | 9.303           | 827065  | 42023  | 9.521   |
| 2      | 24.131          | 7860079 | 190603 | 90.479  |
| Total  |                 | 8687144 | 232626 | 100.000 |



## HPLC of racemic **4b**

SB-IV-233 Racemic E:\CUTN\MSP-LAB\Bharani\Ket-cum project HPLC\233 simple\SB-IV-233 racemic.lcd

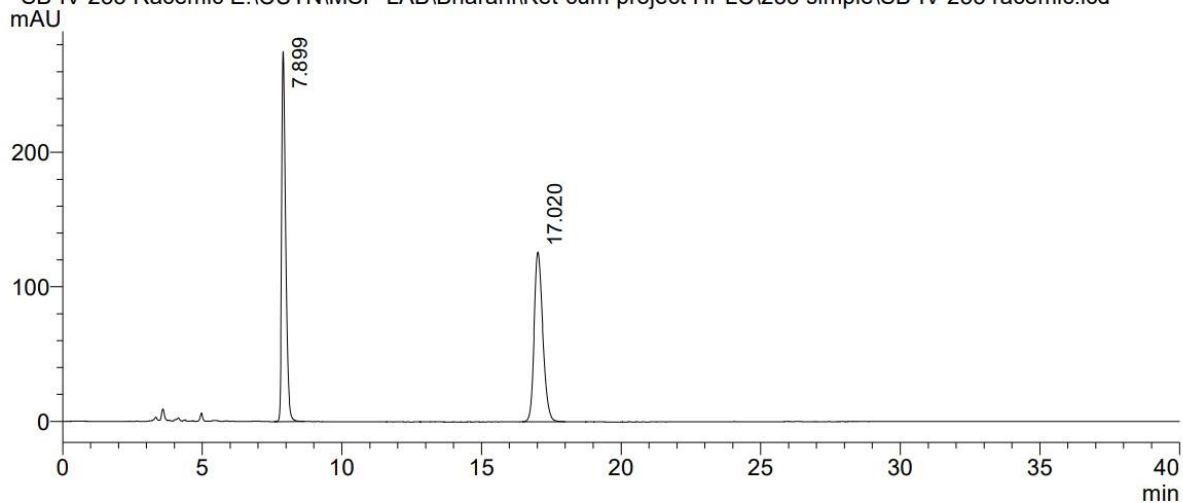

PDA Ch1 254nm

| Peak # | Ret. Time (min) | Area    | Height | Area%   |
|--------|-----------------|---------|--------|---------|
| 1      | 7.899           | 2725957 | 274751 | 50.070  |
| 2      | 17.020          | 2718380 | 126084 | 49.930  |
| Total  |                 | 5444336 | 400835 | 100.000 |

## HPLC of chiral **4b**: 79:21 *er*

SB-IV-233 chiral E:\CUTN\MSP-LAB\Bharani\Ket-cum project HPLC\233 simple\SB-IV-233 chiral.lcd

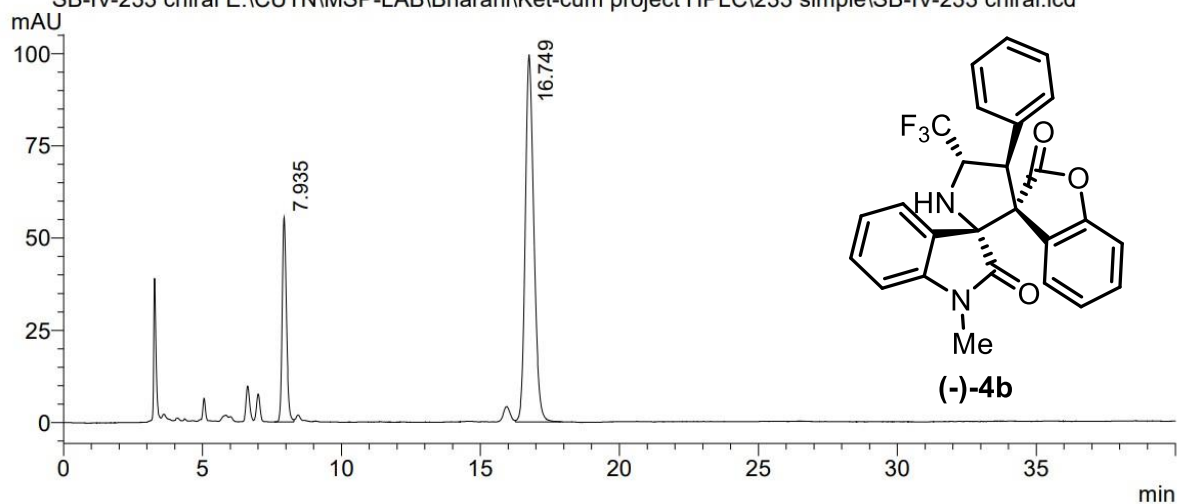

PDA Ch1 254nm

| Peak # | Ret. Time (min) | Area    | Height | Area%   |
|--------|-----------------|---------|--------|---------|
| 1      | 7.935           | 581635  | 55447  | 21.391  |
| 2      | 16.749          | 2137435 | 99503  | 78.609  |
| Total  |                 | 2719071 | 154950 | 100.000 |

### HPLC of racemic **4c**

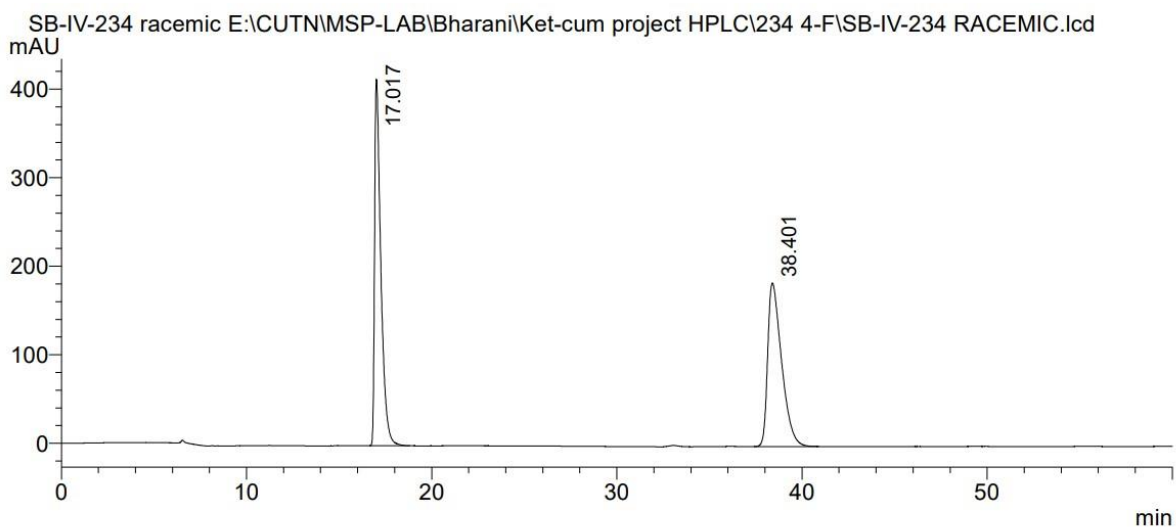

PDA Ch1 254nm

| Peak # | Ret. Time (min) | Area     | Height | Area%   |
|--------|-----------------|----------|--------|---------|
| 1      | 17.017          | 9704574  | 413915 | 50.206  |
| 2      | 38.401          | 9625025  | 184707 | 49.794  |
| Total  |                 | 19329598 | 598622 | 100.000 |

### HPLC of chiral **4c**: 91:9 *er*

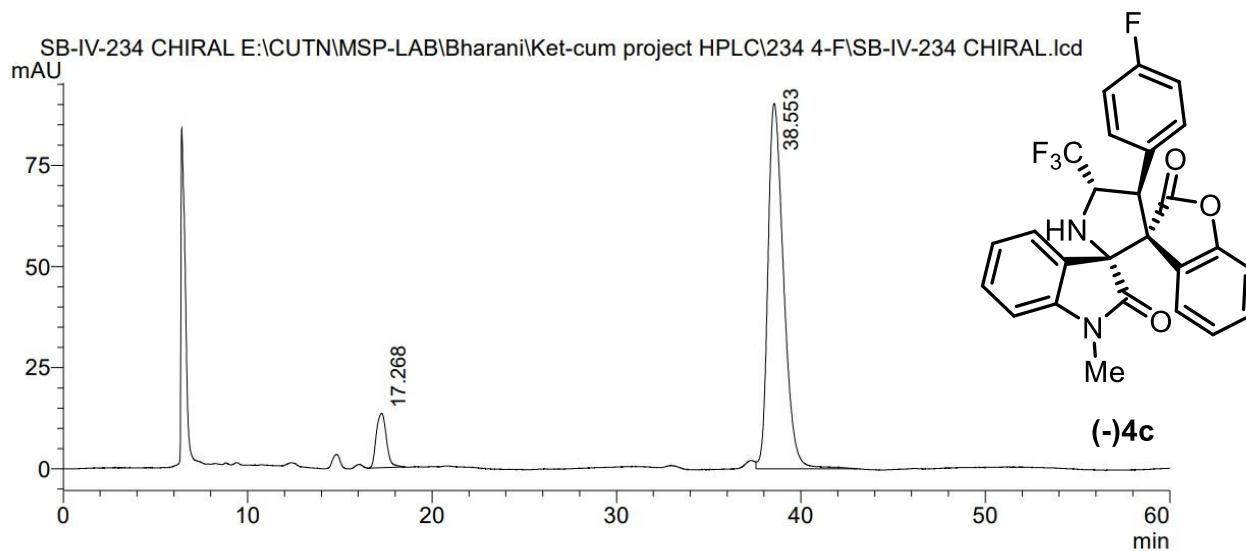

PDA Ch1 254nm

| Peak # | Ret. Time (min) | Area    | Height | Area%   |
|--------|-----------------|---------|--------|---------|
| 1      | 17.268          | 513440  | 13441  | 8.771   |
| 2      | 38.553          | 5340192 | 90289  | 91.229  |
| Total  |                 | 5853632 | 103731 | 100.000 |

### HPLC of racemic **4d**

SB-IV-235 racemic T2 E:\CUTN\MSP-LAB\Bharani\Ket-cum project HPLC\235 2-Cl\SB-IV-235 racemic T2.lcd

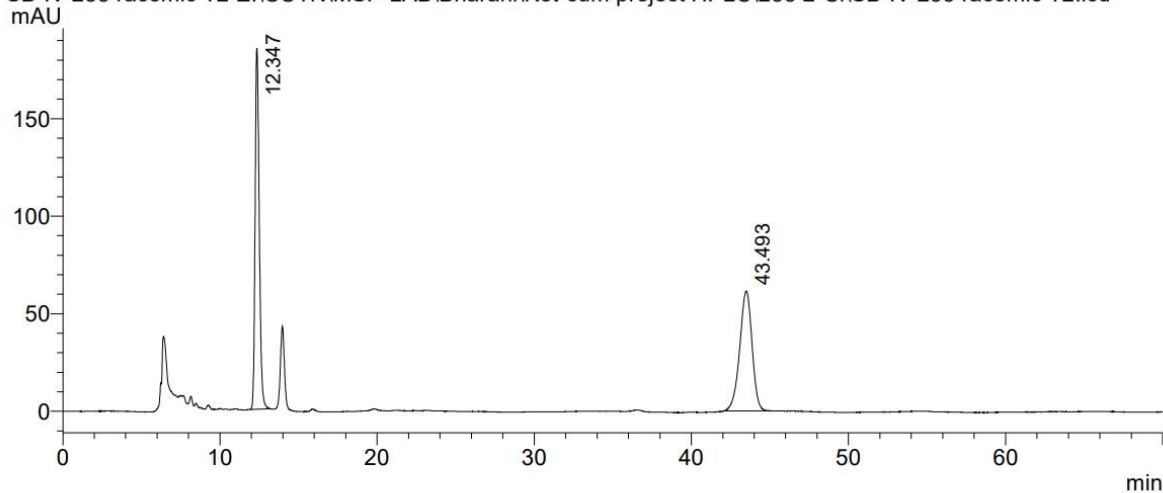

PDA Ch1 254nm

| Peak # | Ret. Time (min) | Area    | Height | Area%   |
|--------|-----------------|---------|--------|---------|
| 1      | 12.347          | 3403021 | 184708 | 50.275  |
| 2      | 43.493          | 3365733 | 61497  | 49.725  |
| Total  |                 | 6768753 | 246204 | 100.000 |

### HPLC of chiral **4d**: 98:2 *er*

SB-IV-235 chiral E:\CUTN\MSP-LAB\Bharani\Ket-cum project HPLC\235 2-Cl\SB-IV-235 chiral.lcd

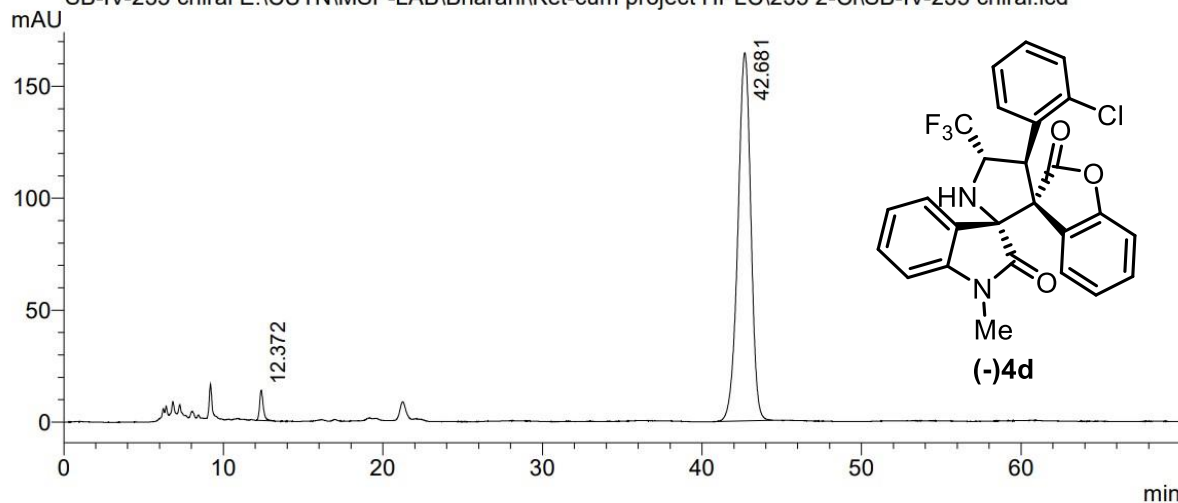

PDA Ch1 254nm

| Peak # | Ret. Time (min) | Area    | Height | Area%   |
|--------|-----------------|---------|--------|---------|
| 1      | 12.372          | 213326  | 13440  | 2.252   |
| 2      | 42.681          | 9259419 | 164437 | 97.748  |
| Total  |                 | 9472745 | 177876 | 100.000 |

# HPLC of racemic **4e**

SB-IV-236 RACEMIC E:\CUTN\MSP-LAB\Bharani\Ket-cum project HPLC\236 3-Cl\SB-IV-236 RACEMIC.lcd

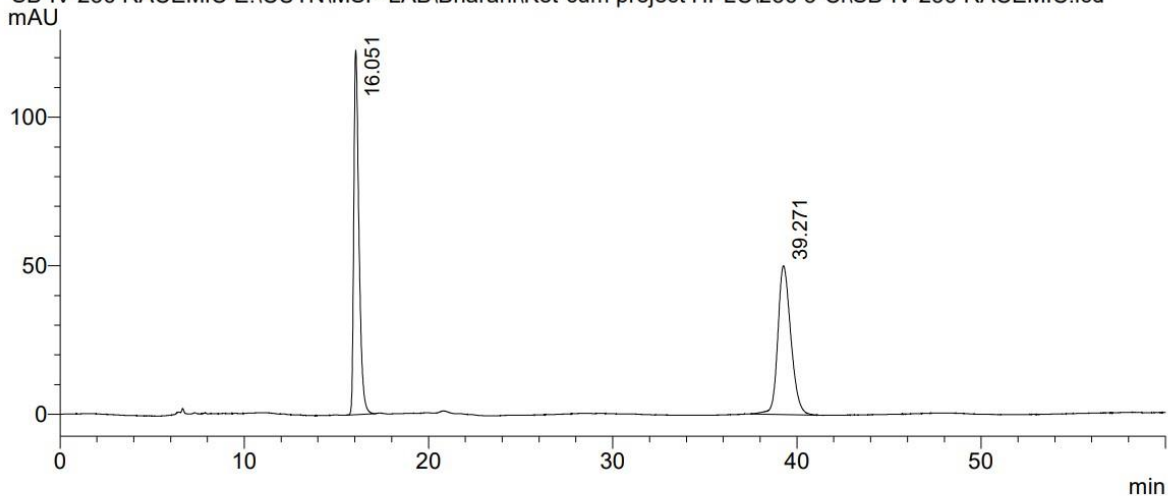

PDA Ch1 254nm

| Peak # | Ret. Time (min) | Area    | Height | Area%   |
|--------|-----------------|---------|--------|---------|
| 1      | 16.051          | 2385183 | 122673 | 49.254  |
| 2      | 39.271          | 2457481 | 50023  | 50.746  |
| Total  |                 | 4842664 | 172696 | 100.000 |

# HPLC of chiral **4e: 80:20 er**

SB-IV-236 CHIRAL E:\CUTN\MSP-LAB\Bharani\Ket-cum project HPLC\236 3-Cl\SB-IV-236 CHIRAL.lcd

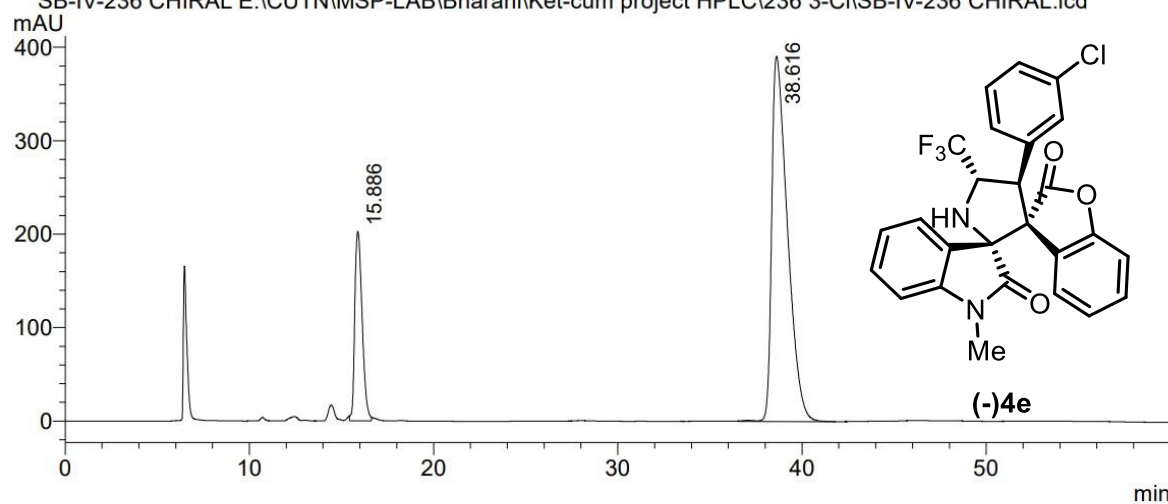

PDA Ch1 254nm

| Peak # | Ret. Time (min) | Area     | Height | Area%   |
|--------|-----------------|----------|--------|---------|
| 1      | 15.886          | 5659671  | 202788 | 19.574  |
| 2      | 38.616          | 23254784 | 390852 | 80.426  |
| Total  |                 | 28914456 | 593640 | 100.000 |

### HPLC of racemic **4f**

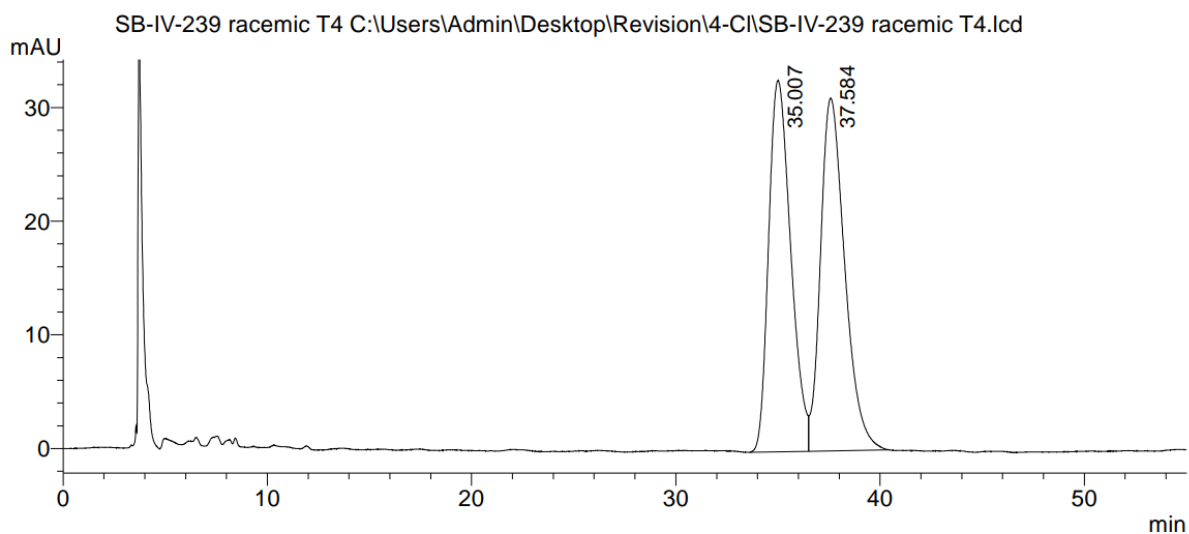

PDA Ch1 254nm

| Peak # | Ret. Time (min) | Area    | Height | Area%   |
|--------|-----------------|---------|--------|---------|
| 1      | 35.007          | 2459039 | 32678  | 48.927  |
| 2      | 37.584          | 2566887 | 31036  | 51.073  |
| Total  |                 | 5025927 | 63714  | 100.000 |

### HPLC of chiral **4f**: 75:25 *er*

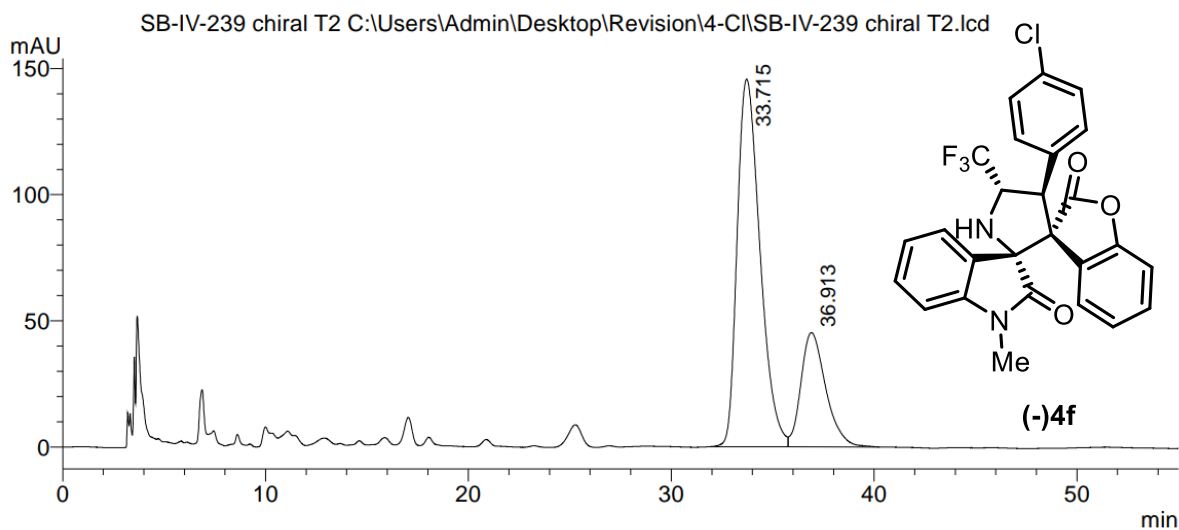

PDA Ch1 254nm

| Peak # | Ret. Time (min) | Area     | Height | Area%   |
|--------|-----------------|----------|--------|---------|
| 1      | 33.715          | 11420540 | 145738 | 74.727  |
| 2      | 36.913          | 3862569  | 45300  | 25.273  |
| Total  |                 | 15283109 | 191038 | 100.000 |

# HPLC of racemic **4h**

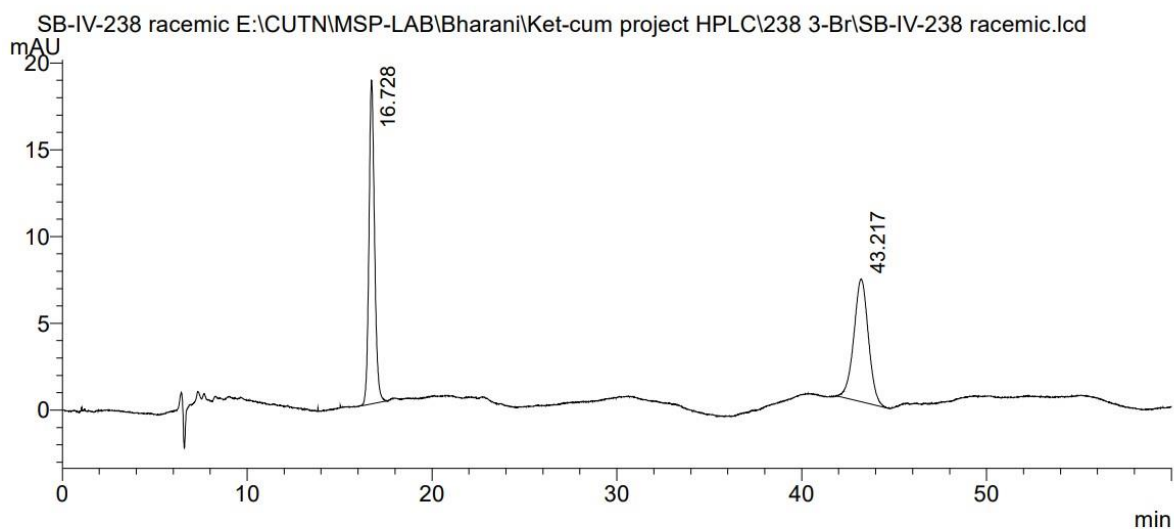

PDA Ch1 254nm

| Peak # | Ret. Time (min) | Area   | Height | Area%   |
|--------|-----------------|--------|--------|---------|
| 1      | 16.728          | 391074 | 18649  | 50.227  |
| 2      | 43.217          | 387542 | 7079   | 49.773  |
| Total  |                 | 778617 | 25728  | 100.000 |

# HPLC of chiral **4h**: **81:19 er**

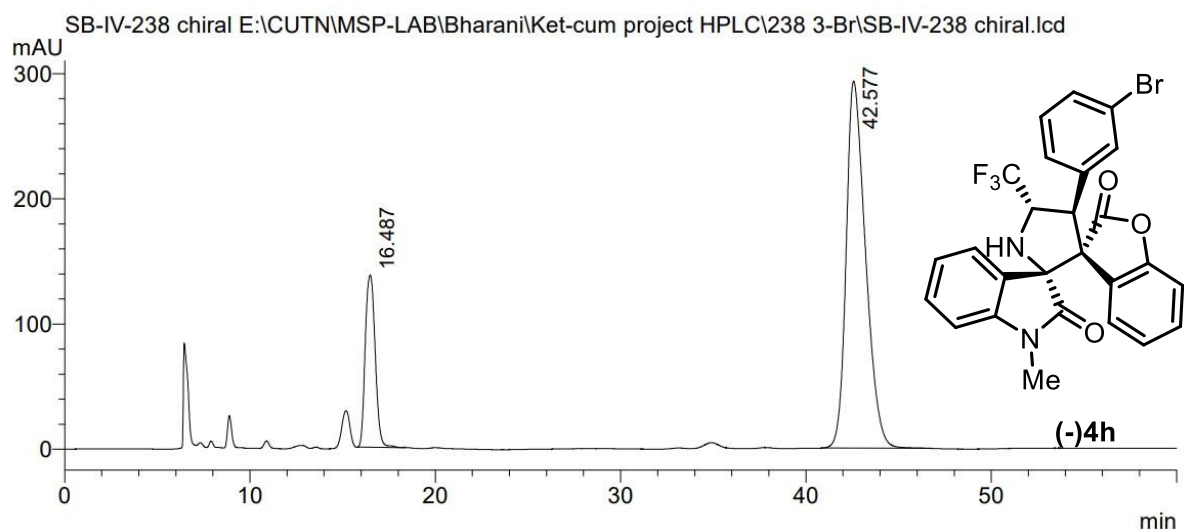

PDA Ch1 254nm

| Peak # | Ret. Time (min) | Area     | Height | Area%   |
|--------|-----------------|----------|--------|---------|
| 1      | 16.487          | 5123536  | 137601 | 19.397  |
| 2      | 42.577          | 21290139 | 293174 | 80.603  |
| Total  |                 | 26413675 | 430775 | 100.000 |

### HPLC of racemic **4i**

SB-IV-244 RACEMIC E:\CUTN\MSP-LAB\Bharani\Ket-cum project HPLC\244 4-Me\SB-IV-244 RACEMIC.lcd

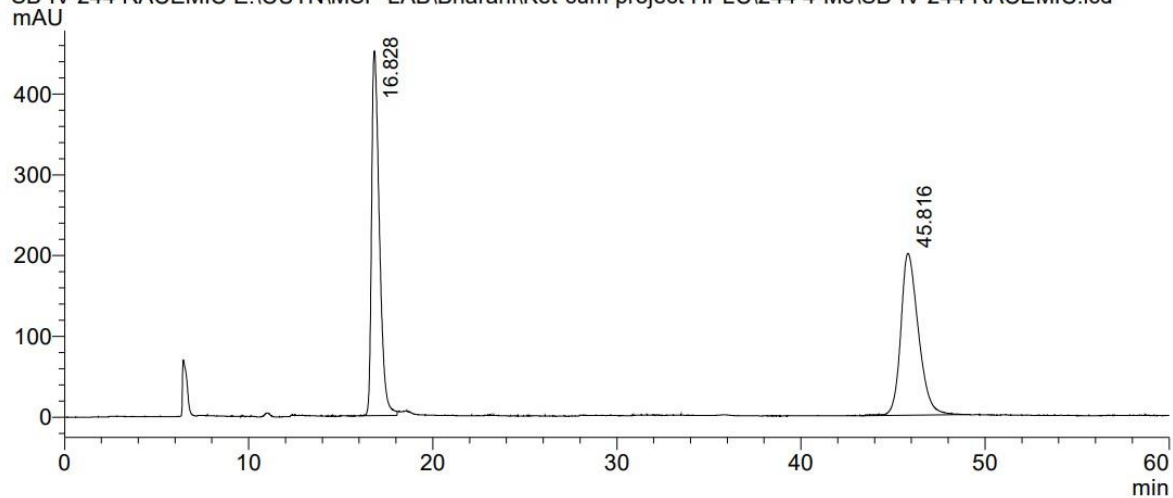

PDA Ch1 254nm

| Peak # | Ret. Time (min) | Area     | Height | Area%   |
|--------|-----------------|----------|--------|---------|
| 1      | 16.828          | 13345206 | 451227 | 49.930  |
| 2      | 45.816          | 13382781 | 200279 | 50.070  |
| Total  |                 | 26727987 | 651506 | 100.000 |

### HPLC of chiral **4i**: 85:15 *er*

SB-IV-244 CHIRAL E:\CUTN\MSP-LAB\Bharani\Ket-cum project HPLC\244 4-Me\SB-IV-244 CHIRAL.lcd

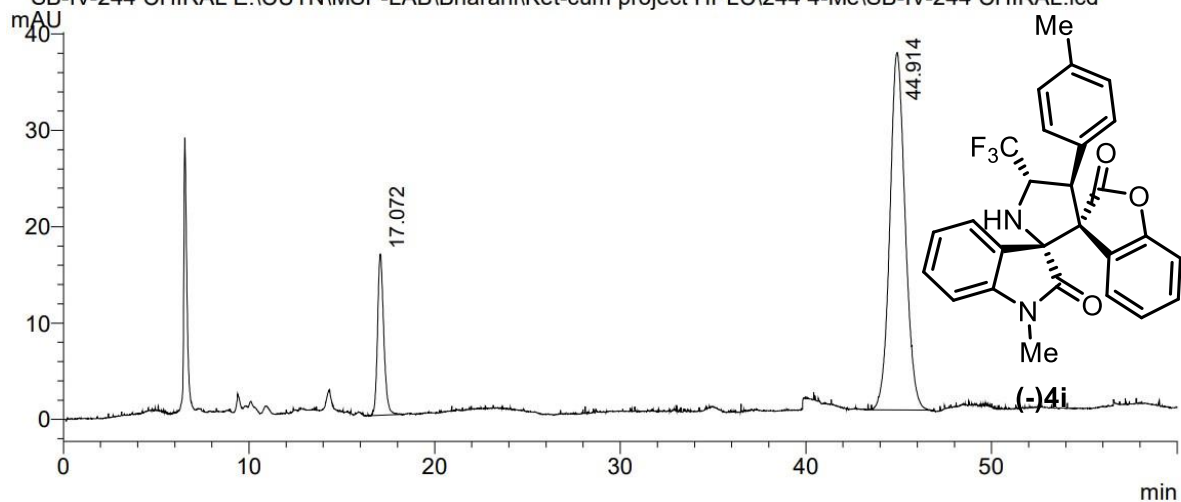

PDA Ch1 254nm

| Peak # | Ret. Time (min) | Area    | Height | Area%   |
|--------|-----------------|---------|--------|---------|
| 1      | 17.072          | 386063  | 16728  | 15.336  |
| 2      | 44.914          | 2131256 | 37082  | 84.664  |
| Total  |                 | 2517318 | 53810  | 100.000 |



### HPLC of racemic **4j**

SB-IV-245 RACEMIC E:\CUTN\MSP-LAB\Bharani\Ket-cum project HPLC\245 3-OMe\SB-IV-245 RACEMIC.lcd

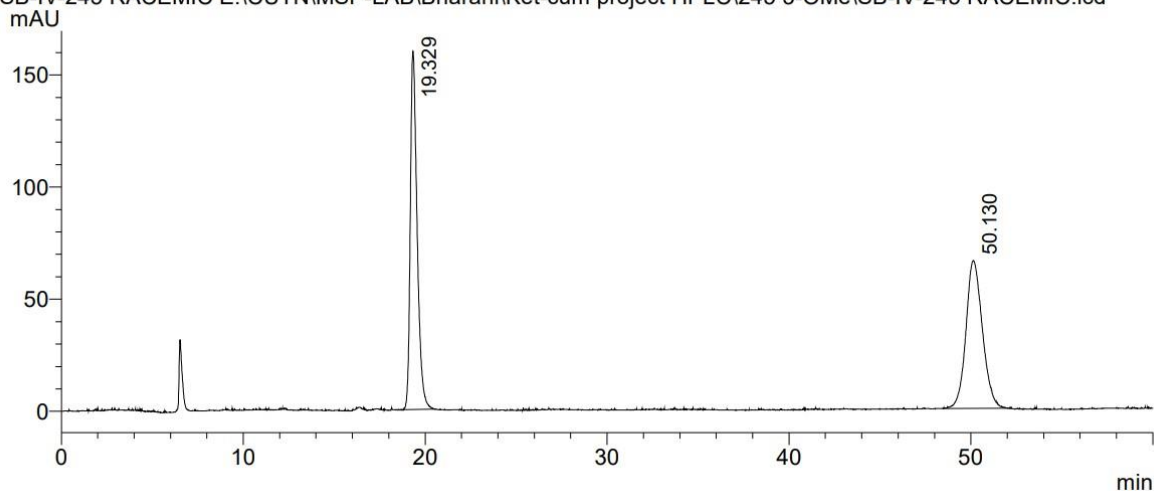

PDA Ch1 254nm

| Peak # | Ret. Time (min) | Area    | Height | Area%   |
|--------|-----------------|---------|--------|---------|
| 1      | 19.329          | 4167604 | 159829 | 50.085  |
| 2      | 50.130          | 4153491 | 65855  | 49.915  |
| Total  |                 | 8321096 | 225684 | 100.000 |

### HPLC of chiral **4j**: 92:8 *er*

SB-IV-245 CHIRAL E:\CUTN\MSP-LAB\Bharani\Ket-cum project HPLC\245 3-OMe\SB-IV-245 CHIRAL.lcd

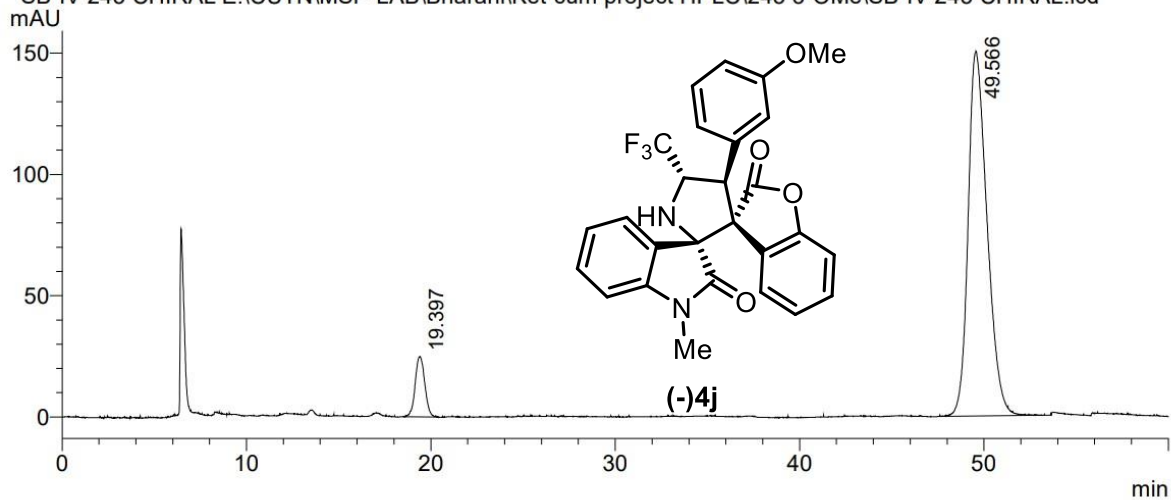

PDA Ch1 254nm

| Peak # | Ret. Time (min) | Area     | Height | Area%   |
|--------|-----------------|----------|--------|---------|
| 1      | 19.397          | 899758   | 24849  | 7.727   |
| 2      | 49.566          | 10744354 | 150370 | 92.273  |
| Total  |                 | 11644112 | 175219 | 100.000 |



### HPLC of racemic **4k**

SB-IV-246 RACEMIC E:\CUTN\MSP-LAB\Bharani\Ket-cum project HPLC\246 4-OMe\SB-IV-246 RACEMIC.lcd

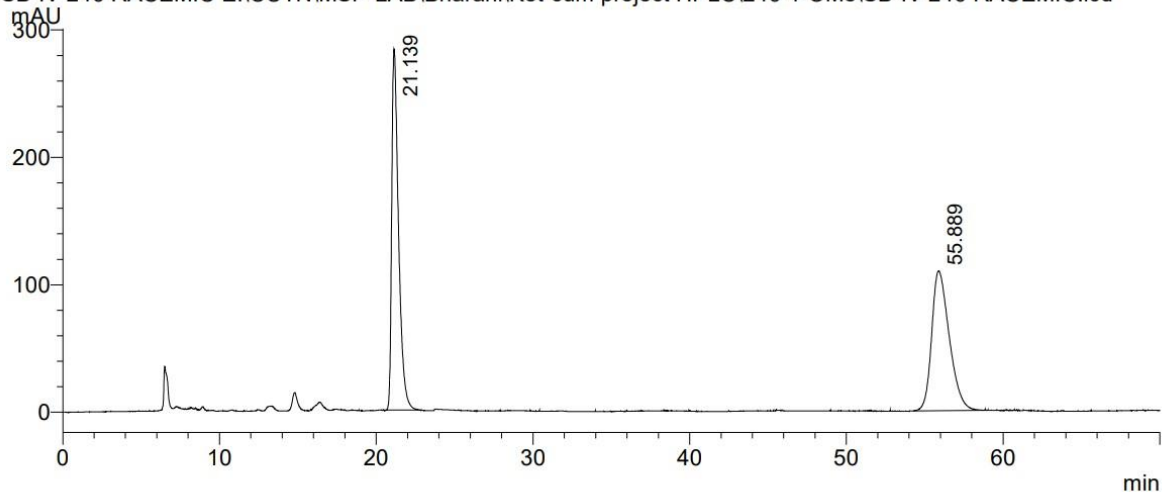

PDA Ch1 254nm

| Peak # | Ret. Time (min) | Area     | Height | Area%   |
|--------|-----------------|----------|--------|---------|
| 1      | 21.139          | 8575165  | 283449 | 50.141  |
| 2      | 55.889          | 8527082  | 109587 | 49.859  |
| Total  |                 | 17102247 | 393036 | 100.000 |

### HPLC of chiral **4k**: 71:29 *er*

SB-IV-246 CHIRAL E:\CUTN\MSP-LAB\Bharani\Ket-cum project HPLC\246 4-OMe\SB-IV-246 CHIRAL.lcd

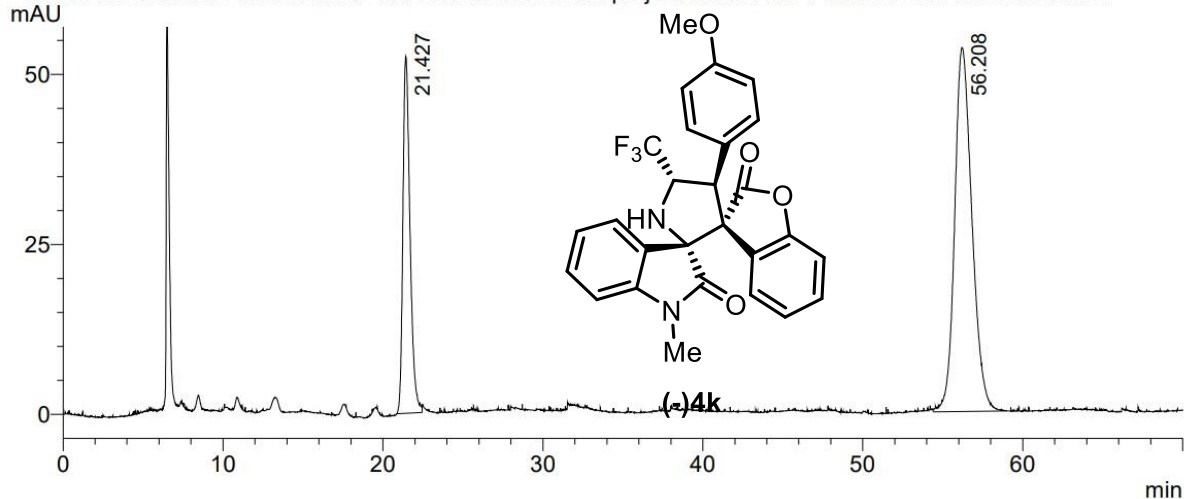

PDA Ch1 254nm

| Peak # | Ret. Time (min) | Area    | Height | Area%   |
|--------|-----------------|---------|--------|---------|
| 1      | 21.427          | 1620417 | 52488  | 28.704  |
| 2      | 56.208          | 4024792 | 53554  | 71.296  |
| Total  |                 | 5645208 | 106042 | 100.000 |

### HPLC of racemic **4l**

SB-IV-243 Racemic E:\CUTN\MSP-LAB\Bharani\Ket-cum project HPLC\243 4-OBn\SB-IV-243 RACEMIC.lcd

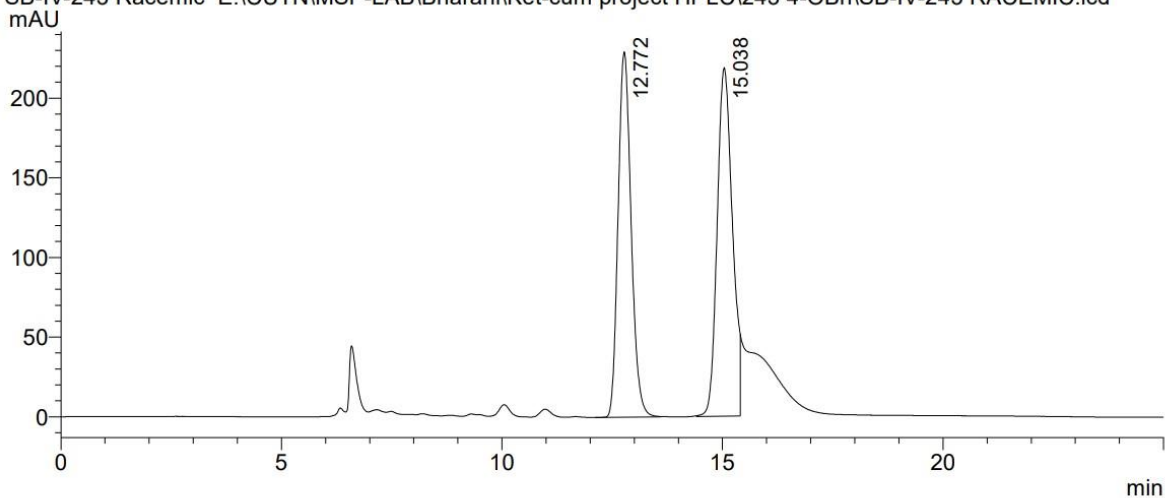

PDA Ch1 254nm

| Peak # | Ret. Time (min) | Area    | Height | Area%   |
|--------|-----------------|---------|--------|---------|
| 1      | 12.772          | 4706090 | 229232 | 47.291  |
| 2      | 15.038          | 5245276 | 218743 | 52.709  |
| Total  |                 | 9951366 | 447975 | 100.000 |

### HPLC of chiral **4l**: 61:39 *er*

SB-IV-243 CHIRAL E:\CUTN\MSP-LAB\Bharani\Ket-cum project HPLC\243 4-OBn\SB-IV-243 CHIRAL.lcd

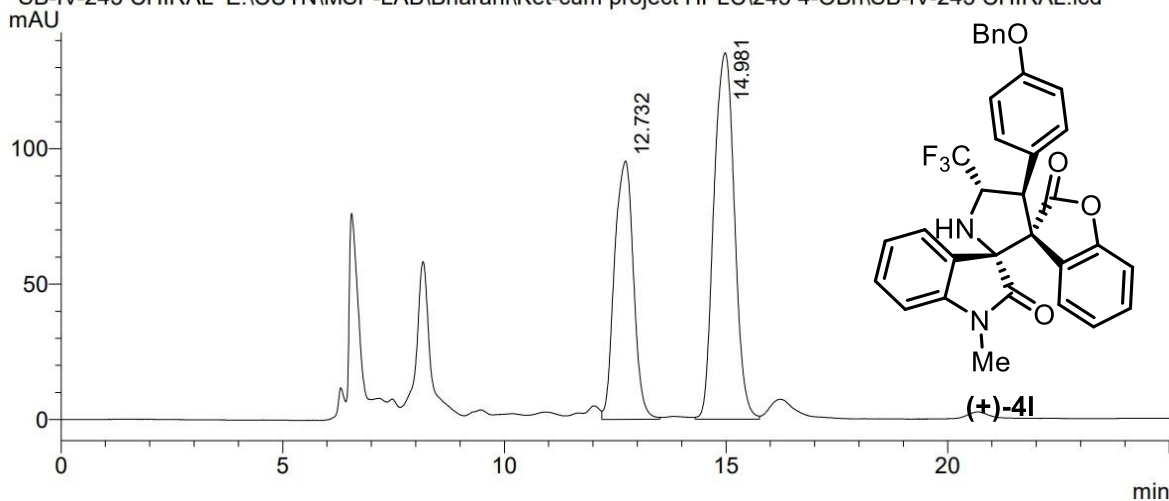

PDA Ch1 254nm

| Peak # | Ret. Time (min) | Area    | Height | Area%   |
|--------|-----------------|---------|--------|---------|
| 1      | 12.732          | 2844209 | 95424  | 39.459  |
| 2      | 14.981          | 4363837 | 135304 | 60.541  |
| Total  |                 | 7208046 | 230728 | 100.000 |

# HPLC of racemic **4n**

SB-IV-248 racemic E:\CUTN\MSP-LAB\Bharani\Ket-cum project HPLC\248 4-NO2\SB-IV-248 racemic.lcd

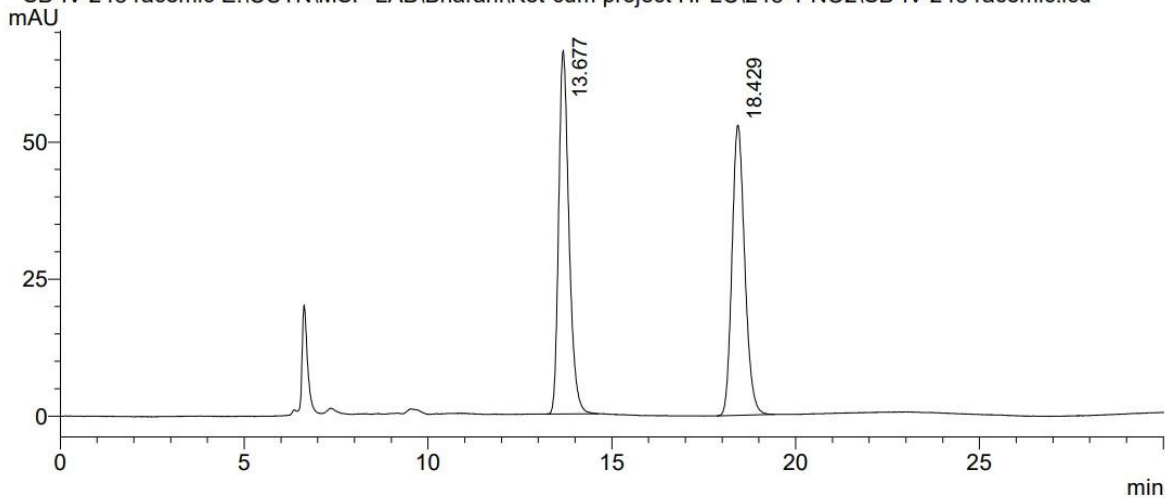

PDA Ch1 254nm

| Peak # | Ret. Time (min) | Area    | Height | Area%   |
|--------|-----------------|---------|--------|---------|
| 1      | 13.677          | 1292196 | 66279  | 50.267  |
| 2      | 18.429          | 1278460 | 52979  | 49.733  |
| Total  |                 | 2570657 | 119259 | 100.000 |

# HPLC of chiral **4n**: 76:24 *er*

SB-IV-248 chiral E:\CUTN\MSP-LAB\Bharani\Ket-cum project HPLC\248 4-NO2\SB-IV-248 chiral.lcd

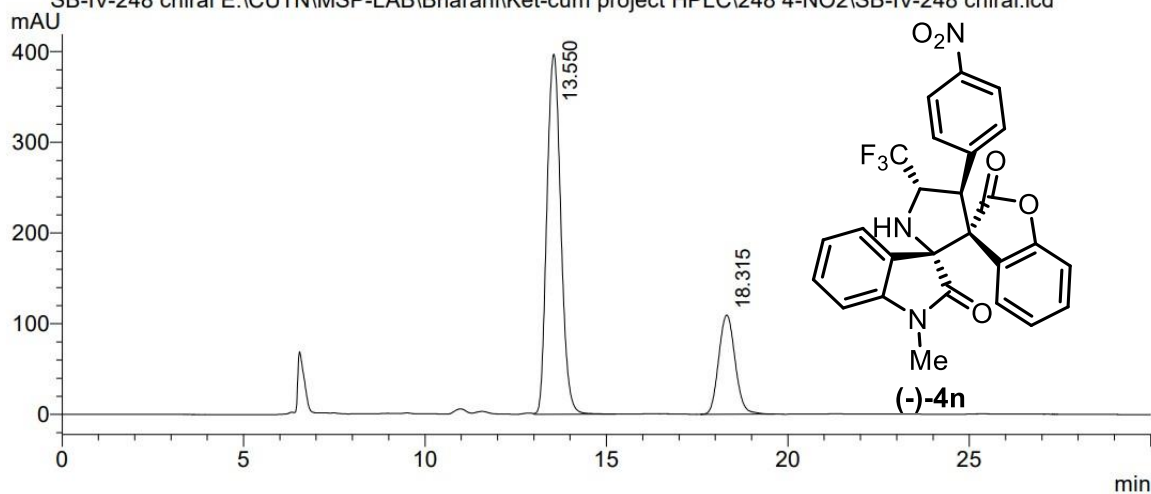

PDA Ch1 254nm

| Peak # | Ret. Time (min) | Area     | Height | Area%   |
|--------|-----------------|----------|--------|---------|
| 1      | 13.550          | 10586700 | 396817 | 75.455  |
| 2      | 18.315          | 3443842  | 109402 | 24.545  |
| Total  |                 | 14030542 | 506219 | 100.000 |

## HPLC of racemic **4o**

SB-IV-249 RACEMIC E:\CUTN\MSP-LAB\Bharani\Ket-cum project HPLC\249 3,4-OMe\SB-IV-249 RACEMIC.lcd

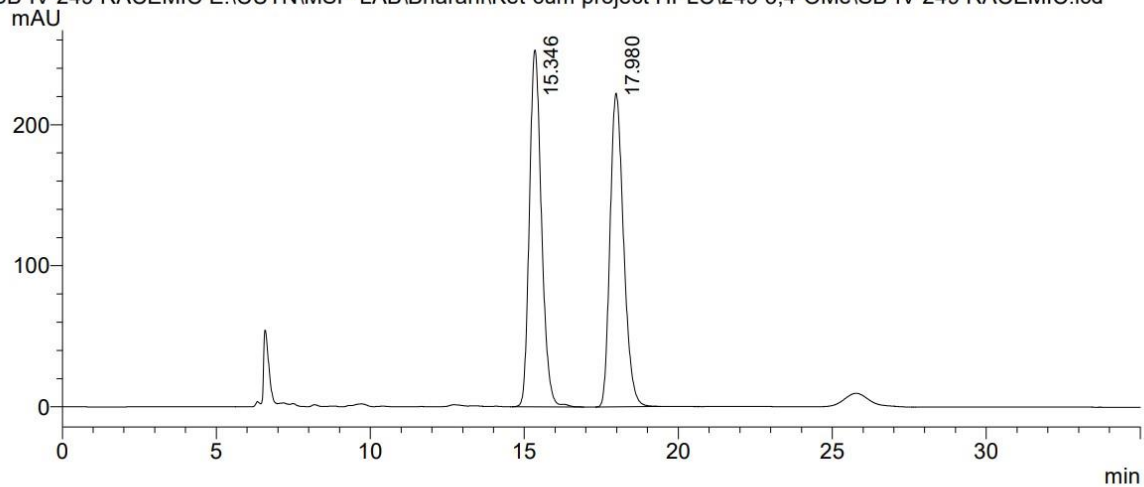

PDA Ch1 254nm

| Peak # | Ret. Time (min) | Area     | Height | Area%   |
|--------|-----------------|----------|--------|---------|
| 1      | 15.346          | 6892213  | 252888 | 50.349  |
| 2      | 17.980          | 6796774  | 222229 | 49.651  |
| Total  |                 | 13688987 | 475117 | 100.000 |

## HPLC of chiral **4o**: 53:47 *er*

SB-IV-249 CHIRAL E:\CUTN\MSP-LAB\Bharani\Ket-cum project HPLC\249 3,4-OMe\SB-IV-249 CHIRAL.lcd

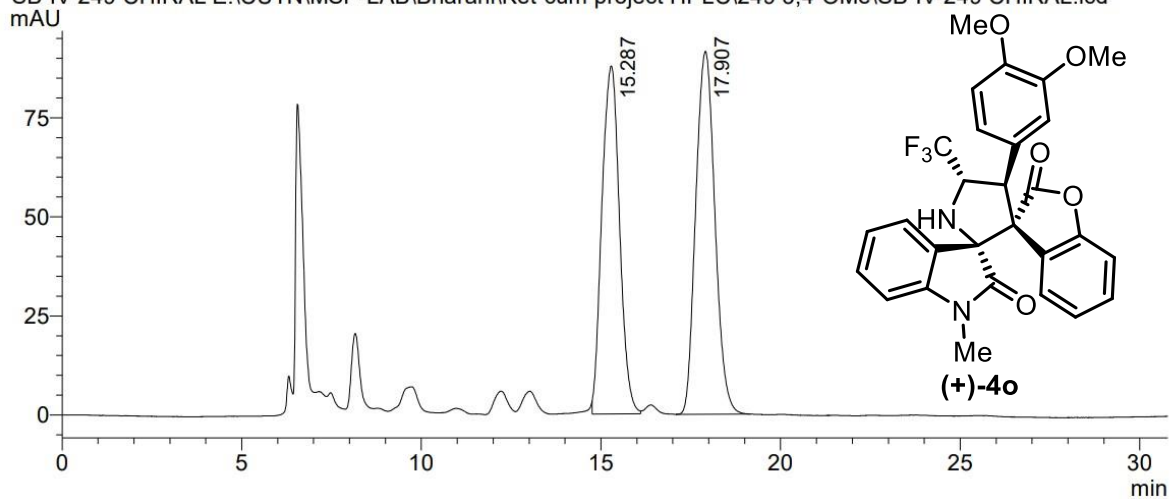

PDA Ch1 254nm

| Peak # | Ret. Time (min) | Area    | Height | Area%   |
|--------|-----------------|---------|--------|---------|
| 1      | 15.287          | 2998244 | 87802  | 46.933  |
| 2      | 17.907          | 3390091 | 91546  | 53.067  |
| Total  |                 | 6388335 | 179348 | 100.000 |

# HPLC of racemic **4p**

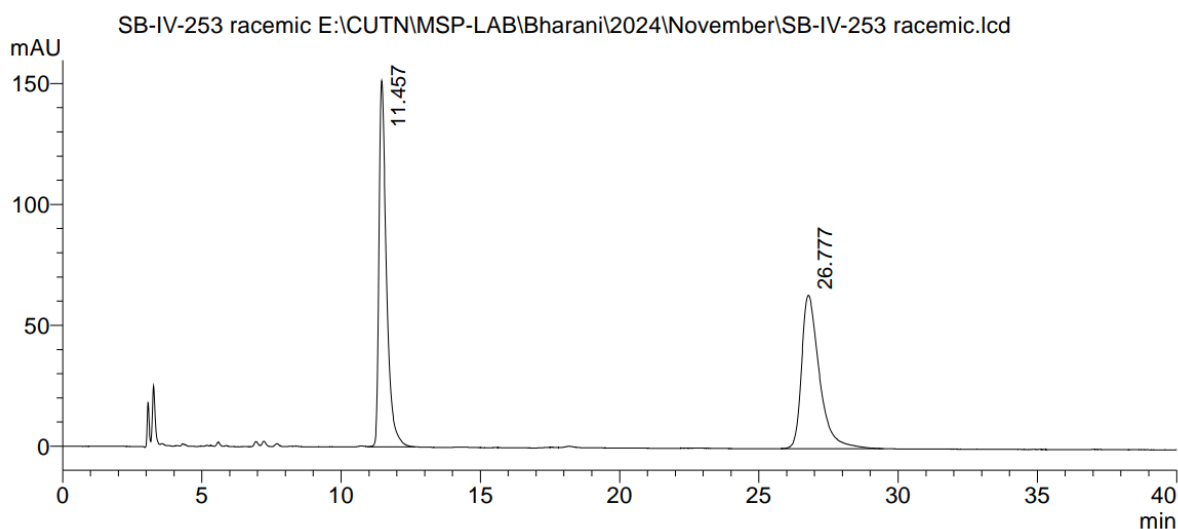

PDA Ch1 254nm

| Peak # | Ret. Time (min) | Area    | Height | Area%   |
|--------|-----------------|---------|--------|---------|
| 1      | 11.457          | 2820693 | 151375 | 50.009  |
| 2      | 26.777          | 2819685 | 63402  | 49.991  |
| Total  |                 | 5640378 | 214776 | 100.000 |

# HPLC of chiral **4p**: **76:24 er**

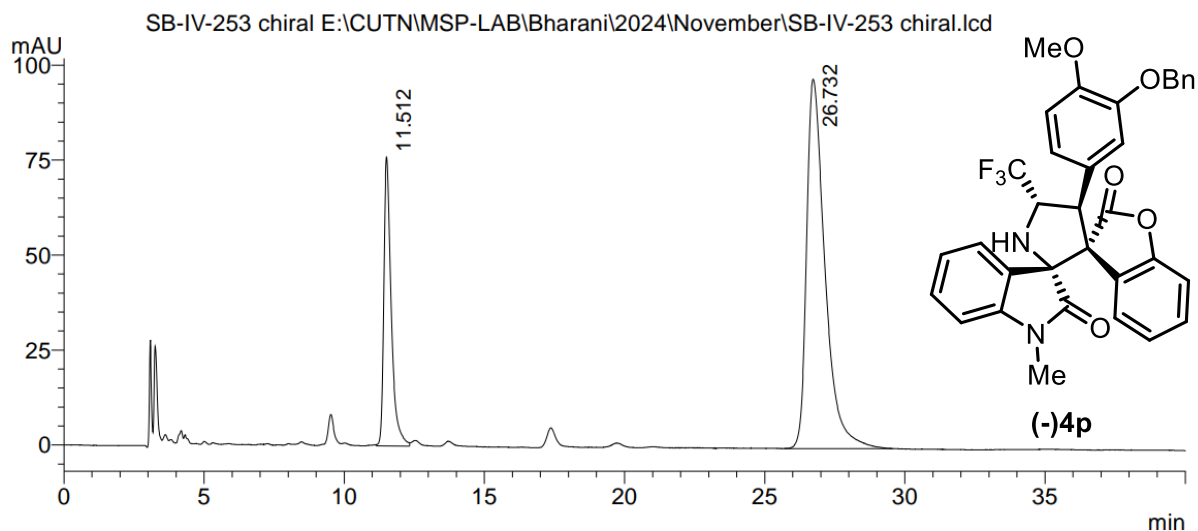

PDA Ch1 254nm

| Peak # | Ret. Time (min) | Area    | Height | Area%   |
|--------|-----------------|---------|--------|---------|
| 1      | 11.512          | 1399730 | 76007  | 23.997  |
| 2      | 26.732          | 4433172 | 97227  | 76.003  |
| Total  |                 | 5832902 | 173234 | 100.000 |

# HPLC of racemic **4r**

SB-IV-252 RACEMIC E:\CUTN\MSP-LAB\Bharani\Ket-cum project HPLC\252 2,3,4-OMe\SB-IV-252 RACEMIC.lcd

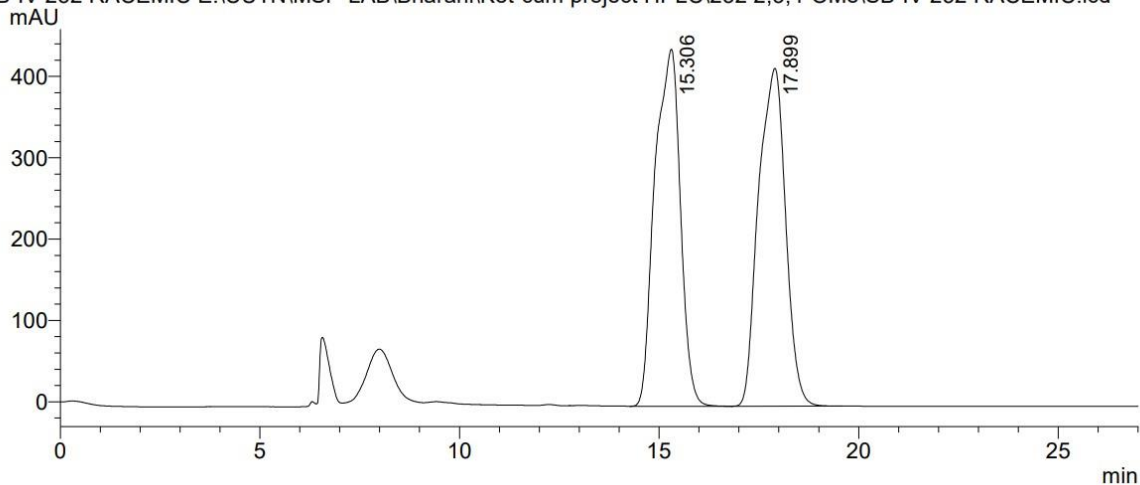

PDA Ch1 254nm

| Peak # | Ret. Time (min) | Area     | Height | Area%   |
|--------|-----------------|----------|--------|---------|
| 1      | 15.306          | 19473109 | 438847 | 49.891  |
| 2      | 17.899          | 19558362 | 415320 | 50.109  |
| Total  |                 | 39031472 | 854167 | 100.000 |

# HPLC of chiral **4r**: 99:1 *er*

SB-IV-252 CHIRAL E:\CUTN\MSP-LAB\Bharani\Ket-cum project HPLC\252 2,3,4-OMe\SB-IV-252 CHIRAL.lcd

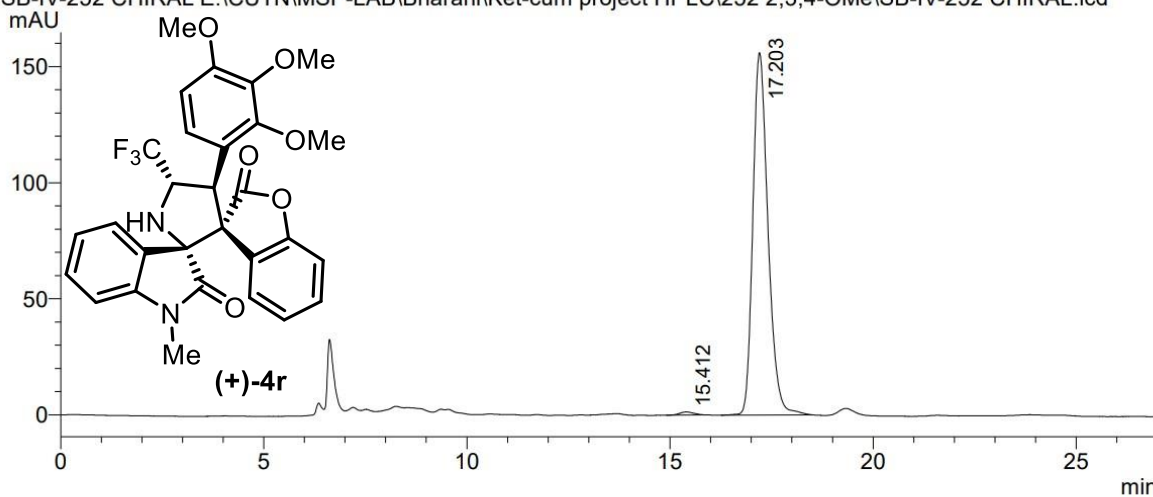

PDA Ch1 254nm

| Peak # | Ret. Time (min) | Area    | Height | Area%   |
|--------|-----------------|---------|--------|---------|
| 1      | 15.412          | 34832   | 1387   | 0.855   |
| 2      | 17.203          | 4040995 | 156016 | 99.145  |
| Total  |                 | 4075826 | 157403 | 100.000 |

# HPLC of racemic **4s**

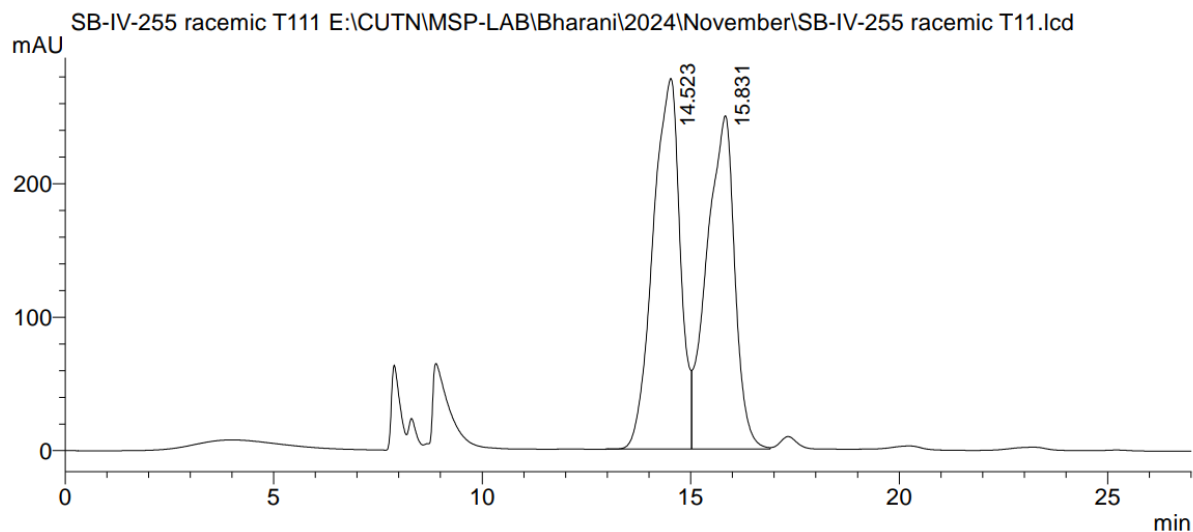

PDA Ch1 254nm

| Peak # | Ret. Time (min) | Area     | Height | Area%   |
|--------|-----------------|----------|--------|---------|
| 1      | 14.523          | 12526614 | 277578 | 51.793  |
| 2      | 15.831          | 11659363 | 249694 | 48.207  |
| Total  |                 | 24185977 | 527273 | 100.000 |

# HPLC of chiral **4s**: **76:24 er**

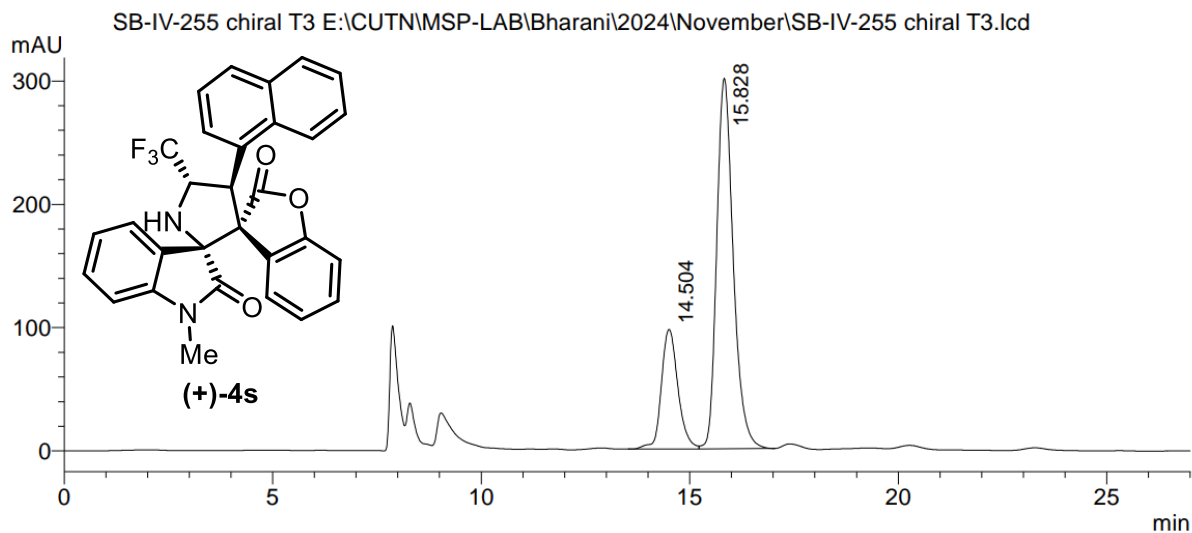

PDA Ch1 254nm

| Peak # | Ret. Time (min) | Area     | Height | Area%   |
|--------|-----------------|----------|--------|---------|
| 1      | 14.504          | 2683554  | 97042  | 24.470  |
| 2      | 15.828          | 8282976  | 300335 | 75.530  |
| Total  |                 | 10966531 | 397376 | 100.000 |

## HPLC of racemic **4u**

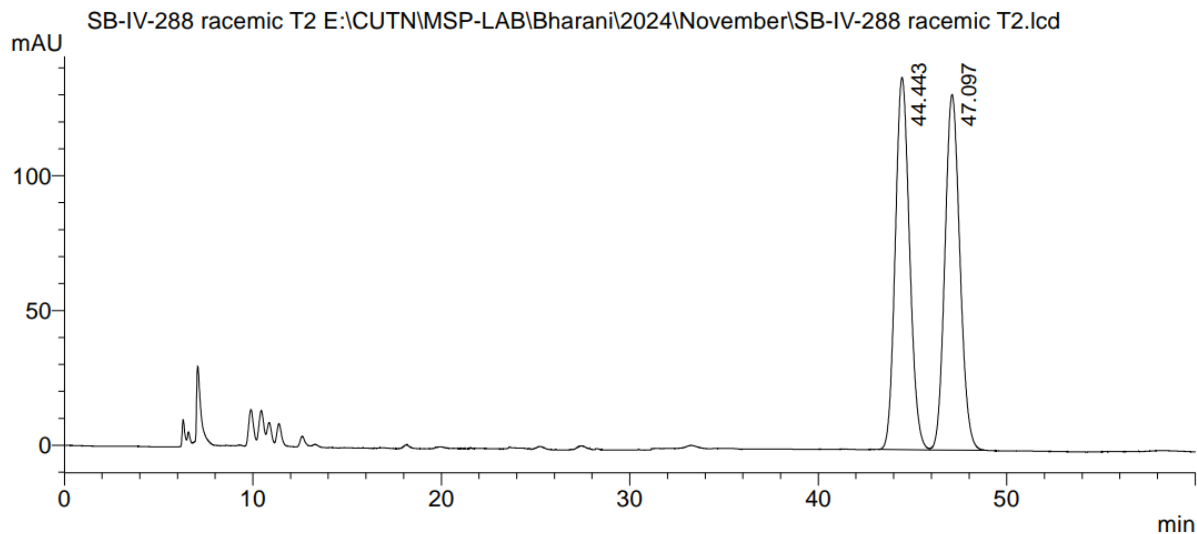

PDA Ch1 254nm

| Peak # | Ret. Time (min) | Area     | Height | Area%   |
|--------|-----------------|----------|--------|---------|
| 1      | 44.443          | 7294348  | 138098 | 49.951  |
| 2      | 47.097          | 7308539  | 131907 | 50.049  |
| Total  |                 | 14602887 | 270005 | 100.000 |

## HPLC of chiral **4u**: **72:28 er**

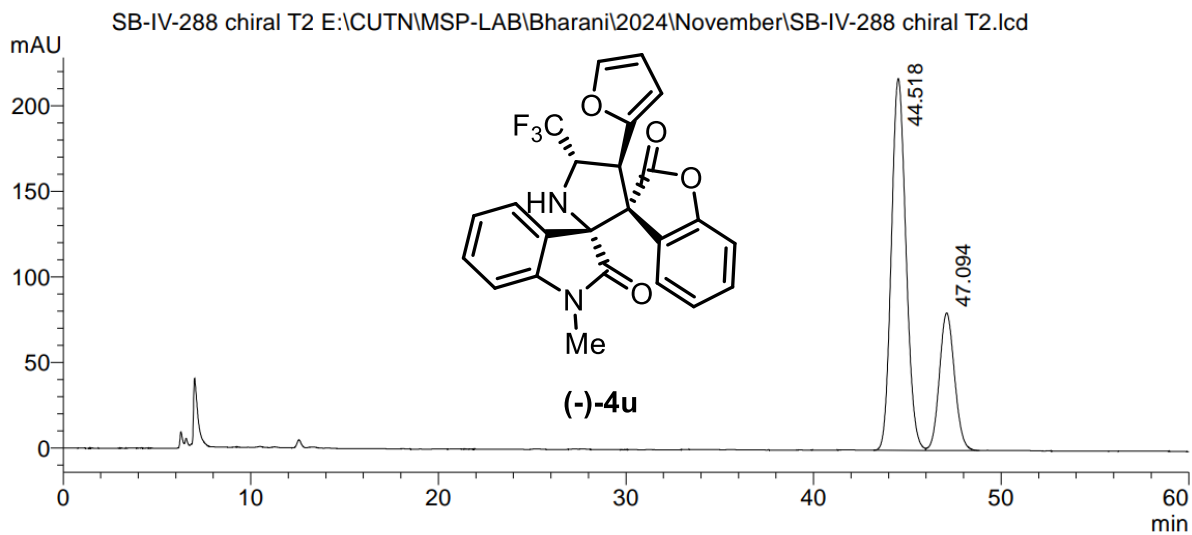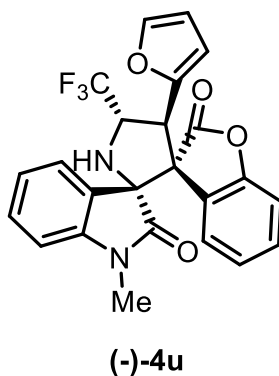

PDA Ch1 254nm

| Peak # | Ret. Time (min) | Area     | Height | Area%   |
|--------|-----------------|----------|--------|---------|
| 1      | 44.518          | 11770684 | 217245 | 72.293  |
| 2      | 47.094          | 4511292  | 80365  | 27.707  |
| Total  |                 | 16281976 | 297611 | 100.000 |



# HPLC of racemic **4v**

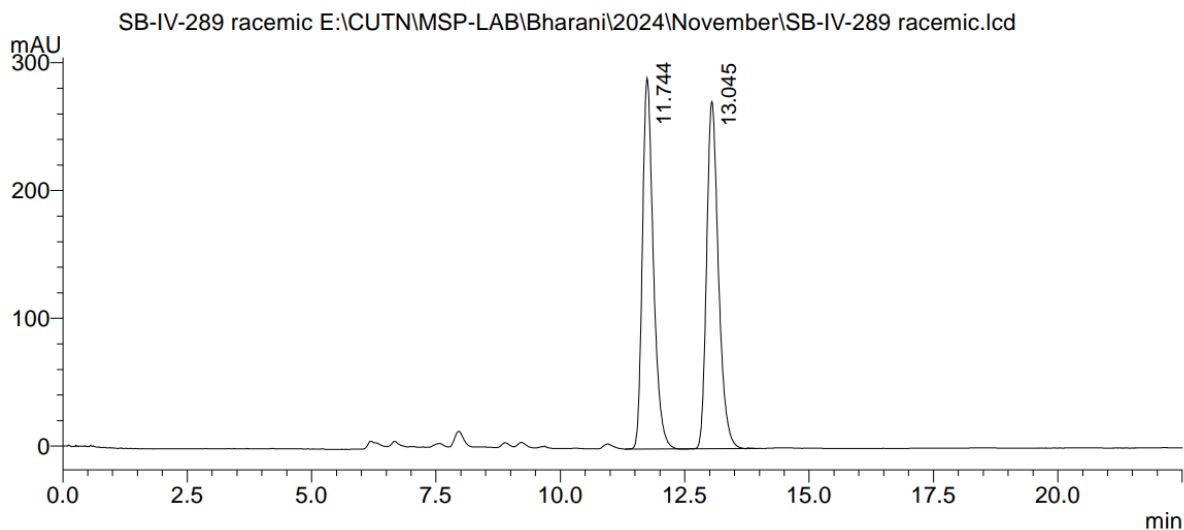

PDA Ch1 254nm

| Peak # | Ret. Time (min) | Area    | Height | Area%   |
|--------|-----------------|---------|--------|---------|
| 1      | 11.744          | 4456177 | 290225 | 49.734  |
| 2      | 13.045          | 4503927 | 271704 | 50.266  |
| Total  |                 | 8960103 | 561928 | 100.000 |

# HPLC of chiral **4v**: **86:14 er**

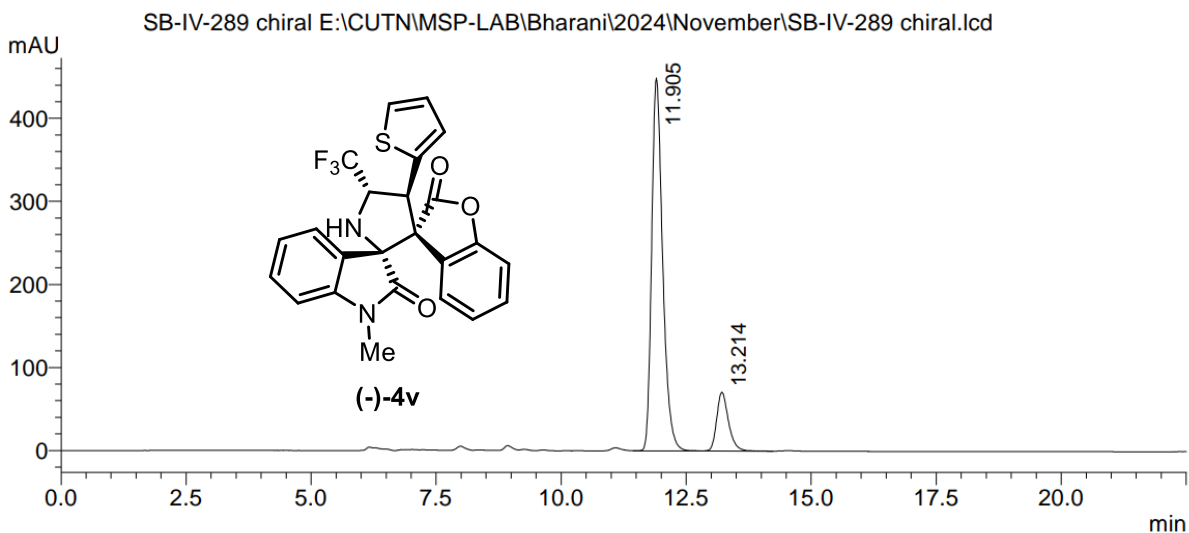

PDA Ch1 254nm

| Peak # | Ret. Time (min) | Area    | Height | Area%   |
|--------|-----------------|---------|--------|---------|
| 1      | 11.905          | 6848295 | 448162 | 85.480  |
| 2      | 13.214          | 1163323 | 70851  | 14.520  |
| Total  |                 | 8011618 | 519013 | 100.000 |

### HPLC of racemic **4w**

SB-IV-259 racemic E:\CUTN\MSP-LAB\Bharani\Ket-cum project HPLC\259 5-F,n-me\SB-IV-259 racemic.lcd

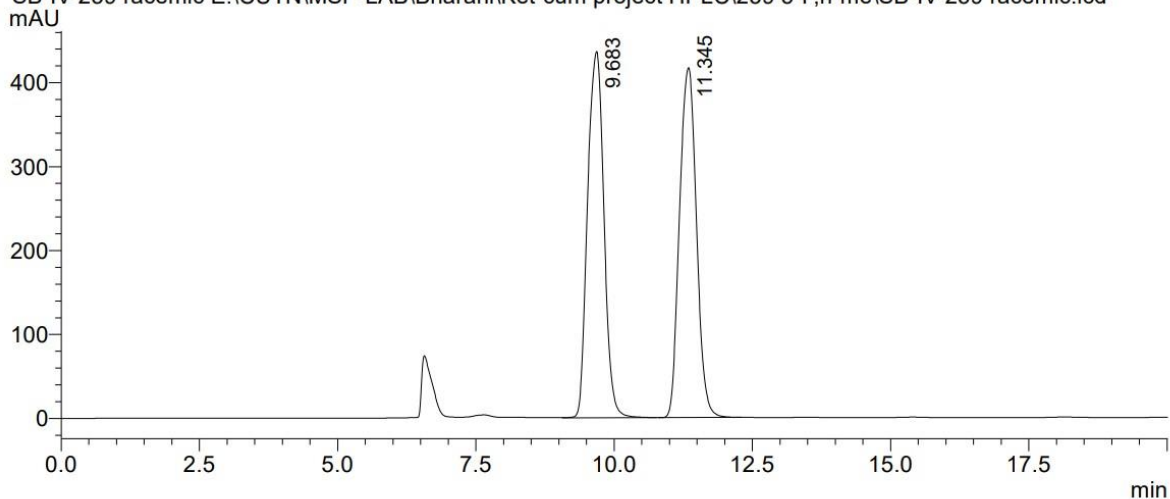

PDA Ch1 254nm

| Peak # | Ret. Time (min) | Area     | Height | Area%   |
|--------|-----------------|----------|--------|---------|
| 1      | 9.683           | 8976163  | 436291 | 50.272  |
| 2      | 11.345          | 8879191  | 416714 | 49.728  |
| Total  |                 | 17855354 | 853005 | 100.000 |

### HPLC of chiral **4w**: **93:7 er**

SB-IV-259 chiral T2 E:\CUTN\MSP-LAB\Bharani\Ket-cum project HPLC\259 5-F,n-me\SB-IV-259 chiral 0.5mL.lcd

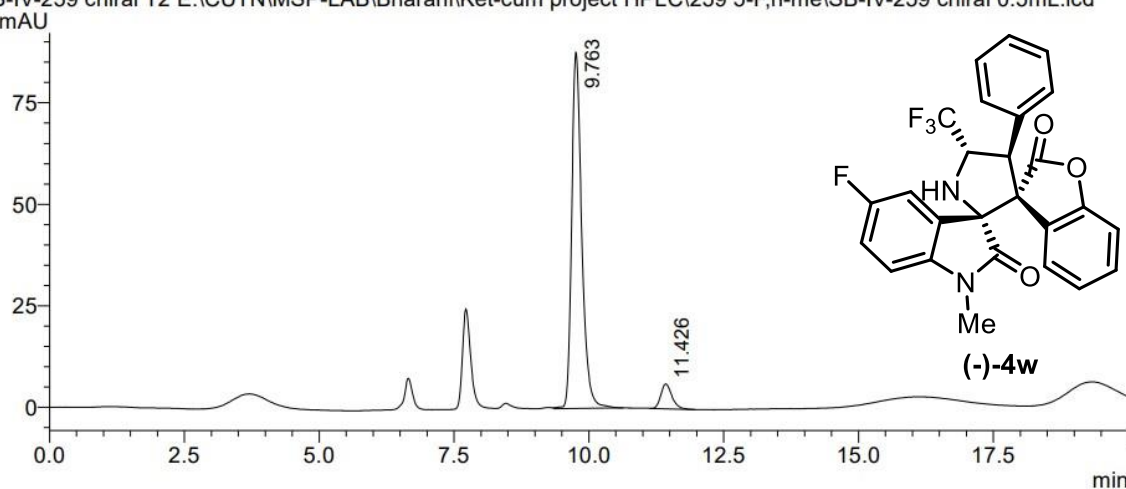

PDA Ch1 254nm

| Peak # | Ret. Time (min) | Area    | Height | Area%   |
|--------|-----------------|---------|--------|---------|
| 1      | 9.763           | 1138579 | 87600  | 92.878  |
| 2      | 11.426          | 87306   | 6128   | 7.122   |
| Total  |                 | 1225885 | 93728  | 100.000 |

# HPLC of racemic **4x**

SB-IV-260 racemic E:\CUTN\MSP-LAB\Bharani\Ket-cum project HPLC\260 7-F,n-me\SB-IV-260 racemic.lcd

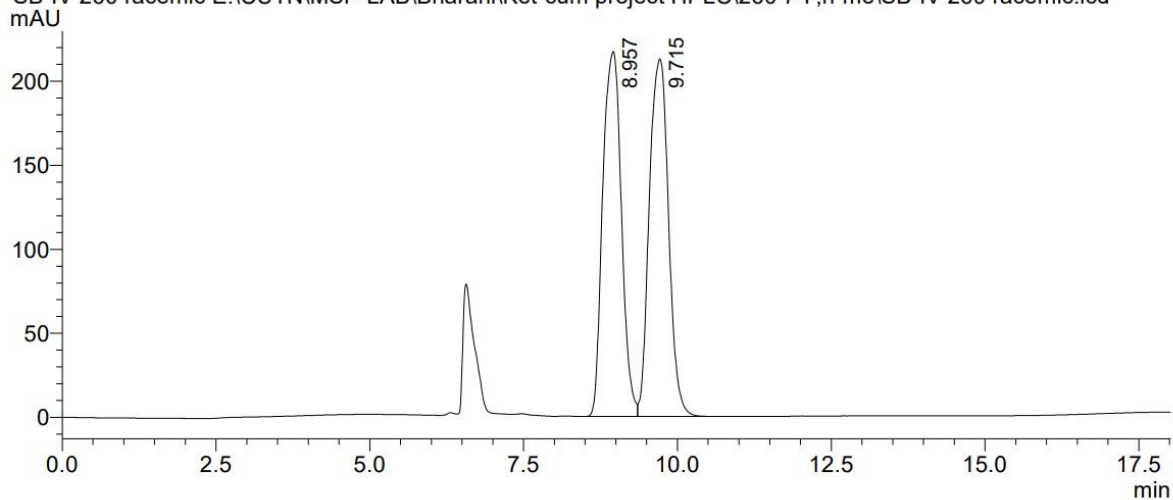

PDA Ch1 254nm

| Peak # | Ret. Time (min) | Area    | Height | Area%   |
|--------|-----------------|---------|--------|---------|
| 1      | 8.957           | 4588388 | 217187 | 49.771  |
| 2      | 9.715           | 4630534 | 212867 | 50.229  |
| Total  |                 | 9218922 | 430053 | 100.000 |

# HPLC of chiral **4x**: 95:5 *er*

SB-IV-260 chiral E:\CUTN\MSP-LAB\Bharani\Ket-cum project HPLC\260 7-F,n-me\SB-IV-260 chiral.lcd

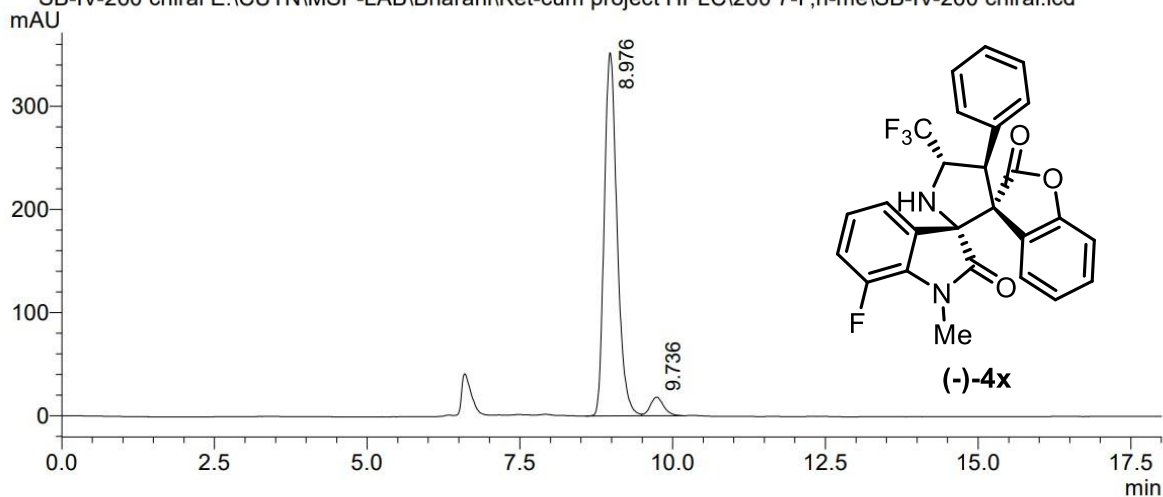

PDA Ch1 254nm

| Peak # | Ret. Time (min) | Area    | Height | Area%   |
|--------|-----------------|---------|--------|---------|
| 1      | 8.976           | 5132224 | 351914 | 94.906  |
| 2      | 9.736           | 275484  | 18037  | 5.094   |
| Total  |                 | 5407709 | 369951 | 100.000 |

### HPLC of racemic **4y**

SB-IV-261 racemic E:\CUTN\MSP-LAB\Bharani\Ket-cum project HPLC\261 5-Cl,n-me\SB-IV-261 racemic.lcd

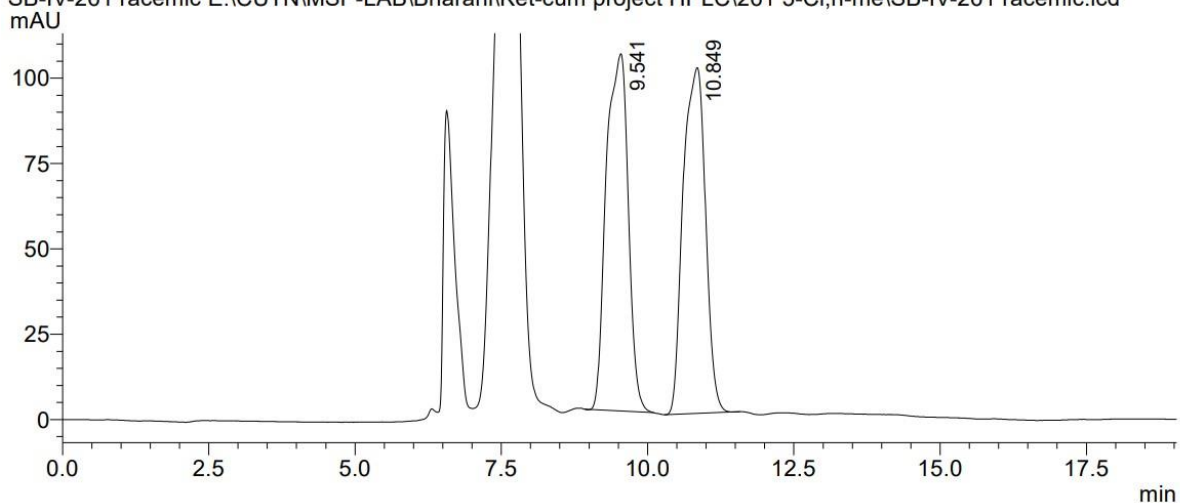

PDA Ch1 254nm

| Peak # | Ret. Time (min) | Area    | Height | Area%   |
|--------|-----------------|---------|--------|---------|
| 1      | 9.541           | 2729125 | 104589 | 50.377  |
| 2      | 10.849          | 2688278 | 101320 | 49.623  |
| Total  |                 | 5417403 | 205909 | 100.000 |

### HPLC of chiral **4y**: 95:5 *er*

SB-IV-261 chiral E:\CUTN\MSP-LAB\Bharani\Ket-cum project HPLC\261 5-Cl,n-me\SB-IV-261 chiral.lcd

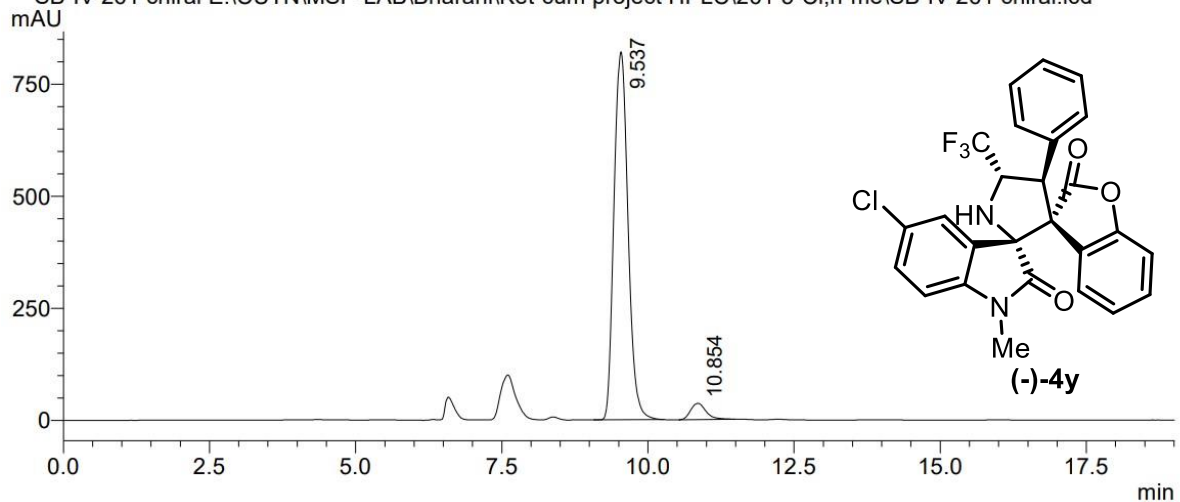

PDA Ch1 254nm

| Peak # | Ret. Time (min) | Area     | Height | Area%   |
|--------|-----------------|----------|--------|---------|
| 1      | 9.537           | 13725263 | 820198 | 95.433  |
| 2      | 10.854          | 656844   | 36053  | 4.567   |
| Total  |                 | 14382107 | 856252 | 100.000 |

# HPLC of racemic **4z**

SB-IV-262 racemic T2 E:\CUTN\MSP-LAB\Bharani\Ket-cum project HPLC\262 5-Br,n-me\SB-IV-262 racemic T2.lcd

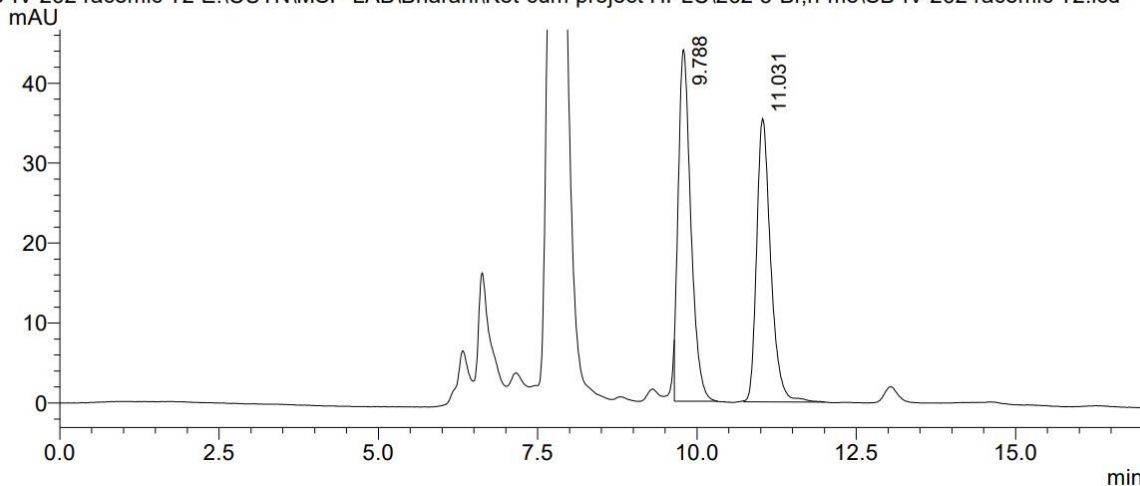

PDA Ch1 254nm

| Peak # | Ret. Time (min) | Area    | Height | Area%   |
|--------|-----------------|---------|--------|---------|
| 1      | 9.788           | 603704  | 43977  | 52.555  |
| 2      | 11.031          | 545003  | 35452  | 47.445  |
| Total  |                 | 1148706 | 79429  | 100.000 |

# HPLC of chiral **4z**: 95:5 *er*

SB-IV-262 chiral T2 E:\CUTN\MSP-LAB\Bharani\Ket-cum project HPLC\262 5-Br,n-me\SB-IV-262 chiral T2.lcd

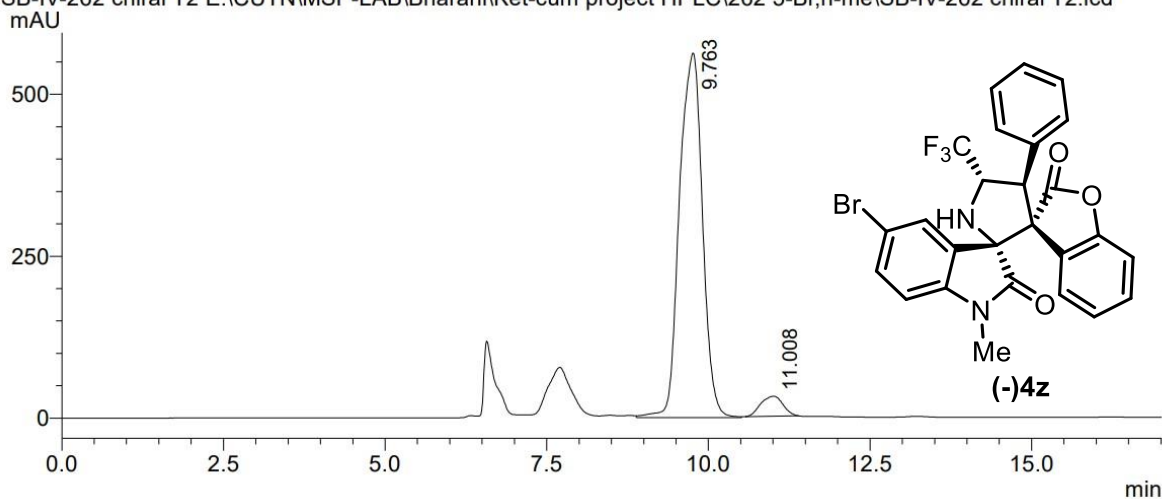

PDA Ch1 254nm

| Peak # | Ret. Time (min) | Area     | Height | Area%   |
|--------|-----------------|----------|--------|---------|
| 1      | 9.763           | 13925525 | 562503 | 94.954  |
| 2      | 11.008          | 740001   | 30902  | 5.046   |
| Total  |                 | 14665526 | 593404 | 100.000 |

### HPLC of racemic **4a'**

SB-IV-264 racemic E:\CUTN\MSP-LAB\Bharani\Ket-cum project HPLC\264 5-I,n-me\SB-IV-264 racemic.lcd

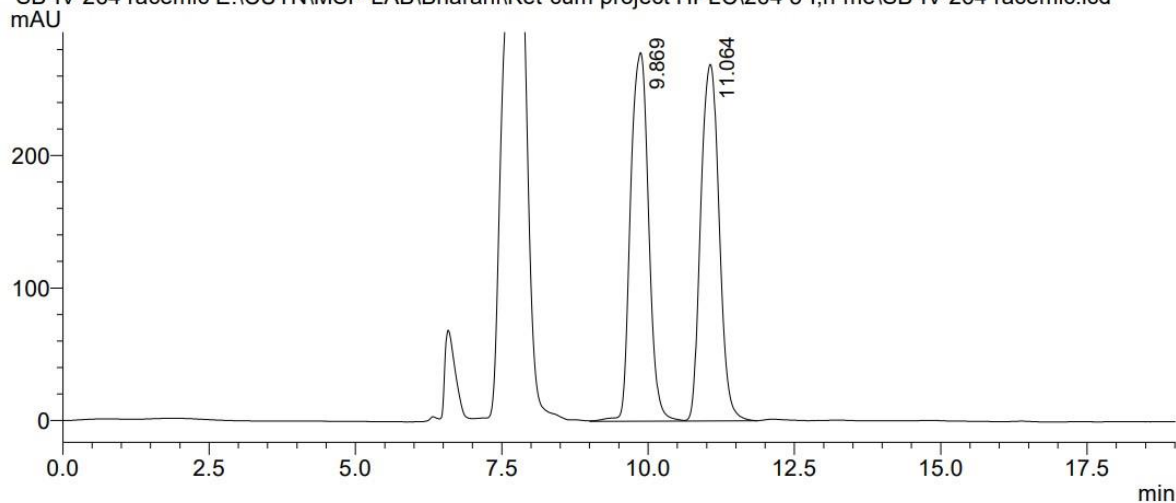

PDA Ch1 254nm

| Peak # | Ret. Time (min) | Area     | Height | Area%   |
|--------|-----------------|----------|--------|---------|
| 1      | 9.869           | 5966021  | 278105 | 50.309  |
| 2      | 11.064          | 5892647  | 269191 | 49.691  |
| Total  |                 | 11858667 | 547296 | 100.000 |

### HPLC of chiral **4a'**: 96:4 *er*

SB-IV-264 chiral E:\CUTN\MSP-LAB\Bharani\Ket-cum project HPLC\264 5-I,n-me\SB-IV-264 chiral.lcd

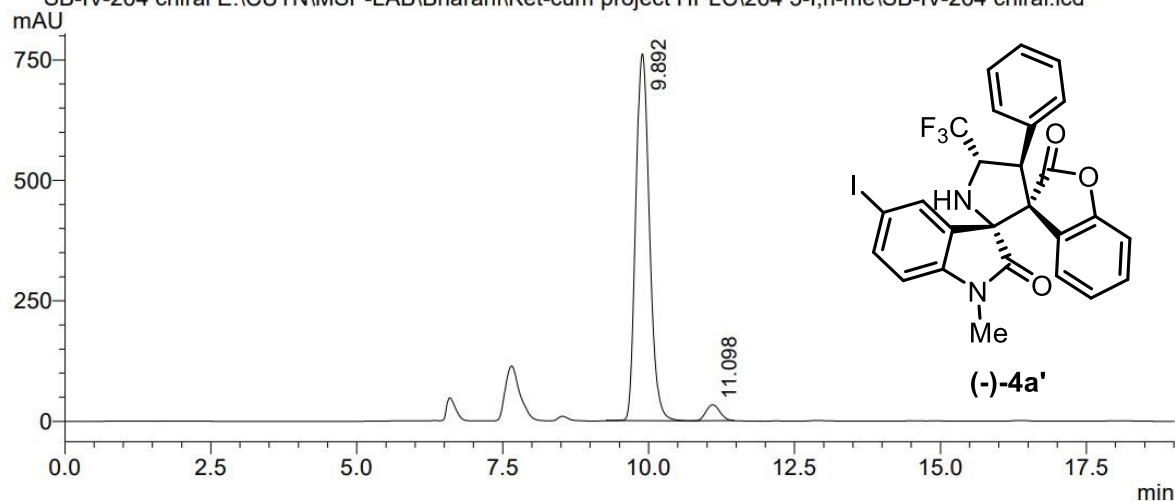

PDA Ch1 254nm

| Peak # | Ret. Time (min) | Area     | Height | Area%   |
|--------|-----------------|----------|--------|---------|
| 1      | 9.892           | 12460381 | 760941 | 95.795  |
| 2      | 11.098          | 547026   | 32984  | 4.205   |
| Total  |                 | 13007407 | 793925 | 100.000 |

### HPLC of racemic **4b'**

SB-IV-265 racemic T2 E:\CUTN\MSP-LAB\Bharani\Ket-cum project HPLC\265 5-OMe,n-me\SB-IV-265 racemic T2.lcd

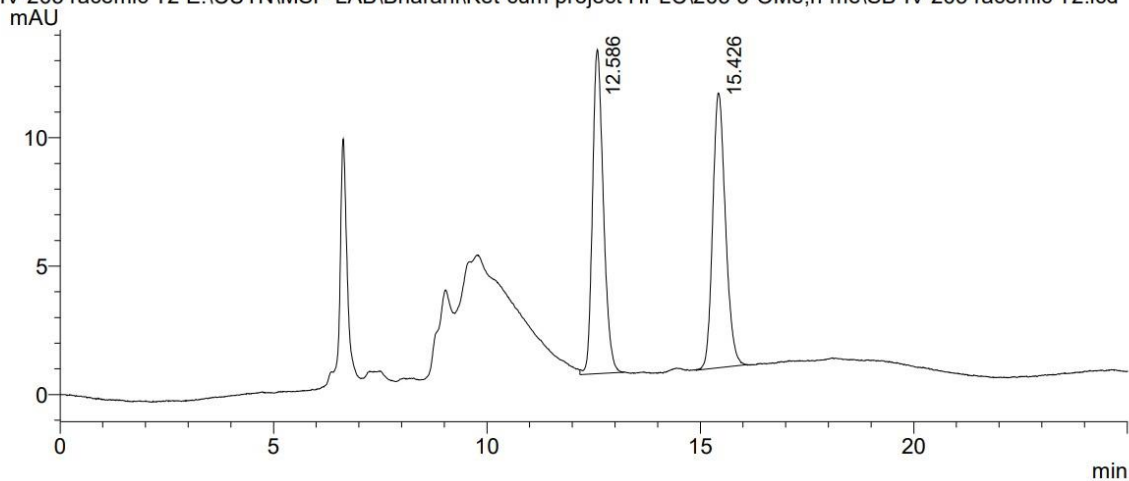

PDA Ch1 254nm

| Peak # | Ret. Time (min) | Area   | Height | Area%   |
|--------|-----------------|--------|--------|---------|
| 1      | 12.586          | 223619 | 12625  | 50.060  |
| 2      | 15.426          | 223081 | 10706  | 49.940  |
| Total  |                 | 446700 | 23331  | 100.000 |

### HPLC of chiral **4b'**: 98:2 *er*

SB-IV-265 chiral E:\CUTN\MSP-LAB\Bharani\Ket-cum project HPLC\265 5-OMe,n-me\SB-IV-265 chiral.lcd

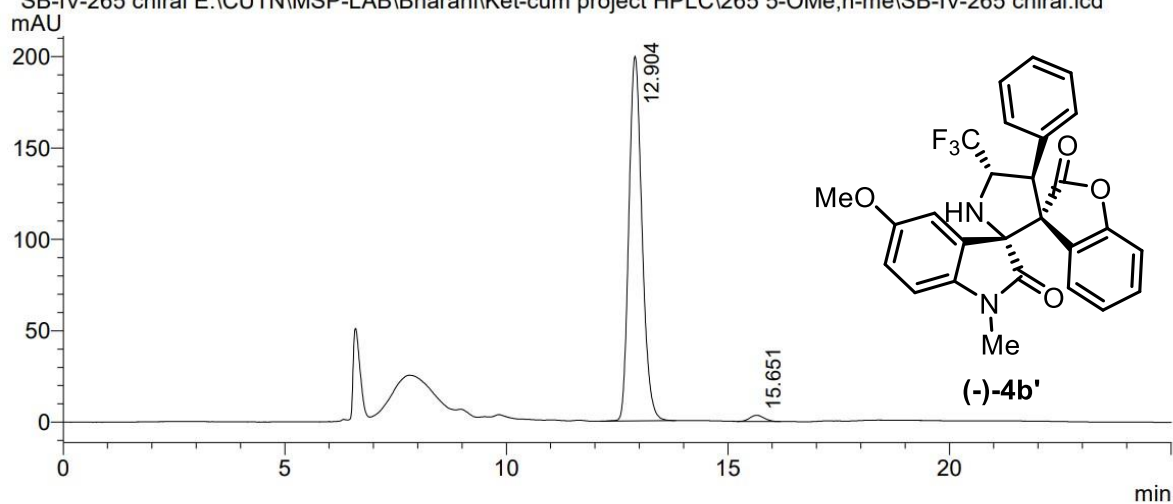

PDA Ch1 254nm

| Peak # | Ret. Time (min) | Area    | Height | Area%   |
|--------|-----------------|---------|--------|---------|
| 1      | 12.904          | 4104098 | 199482 | 98.204  |
| 2      | 15.651          | 75057   | 3354   | 1.796   |
| Total  |                 | 4179155 | 202835 | 100.000 |



### HPLC of racemic **4c'**

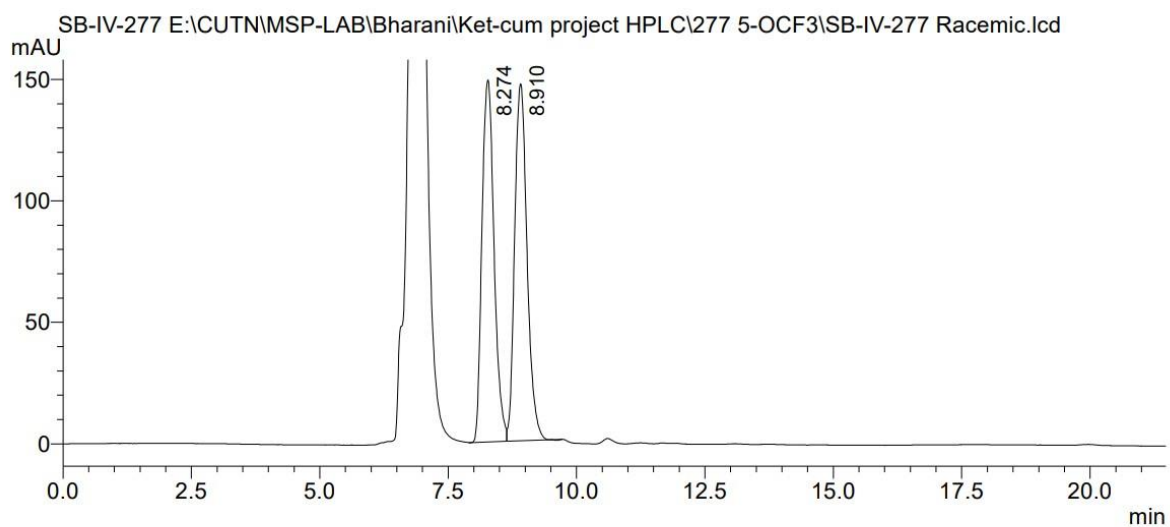

PDA Ch1 254nm

| Peak # | Ret. Time (min) | Area    | Height | Area%   |
|--------|-----------------|---------|--------|---------|
| 1      | 8.274           | 2443751 | 148950 | 49.796  |
| 2      | 8.910           | 2463729 | 146913 | 50.204  |
| Total  |                 | 4907480 | 295863 | 100.000 |

### HPLC of chiral **4c'**: 98:2 *er*

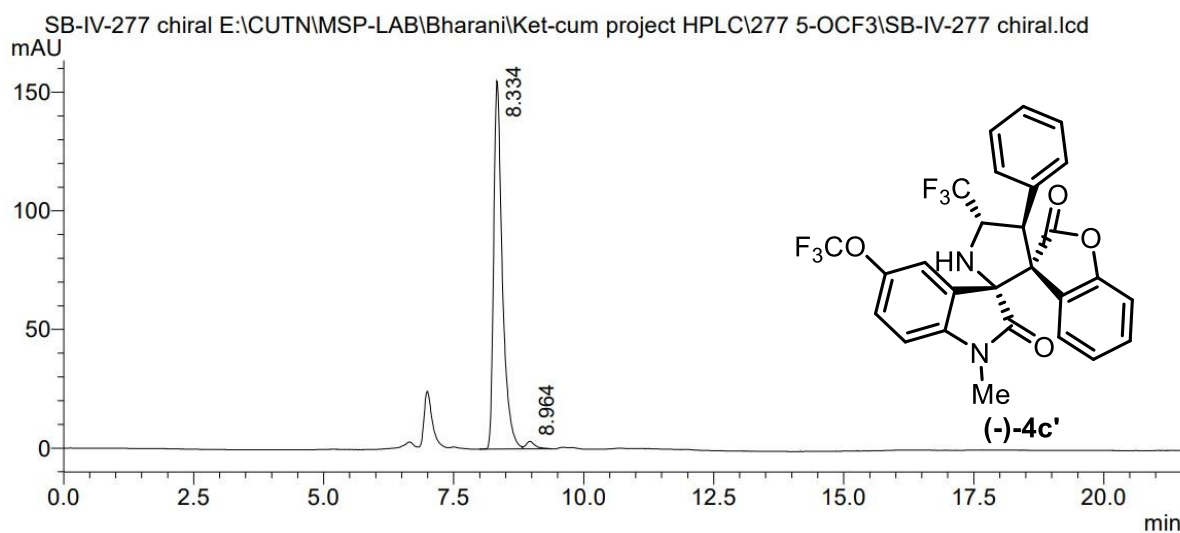

PDA Ch1 254nm

| Peak # | Ret. Time (min) | Area    | Height | Area%   |
|--------|-----------------|---------|--------|---------|
| 1      | 8.334           | 1796705 | 155097 | 97.906  |
| 2      | 8.964           | 38422   | 3141   | 2.094   |
| Total  |                 | 1835126 | 158238 | 100.000 |



### HPLC of racemic **4d'**

SB-IV-266 racemic E:\CUTN\MSP-LAB\Bharani\Ket-cum project HPLC\266 5-Cl,7-me\SB-IV-266 racemic.lcd

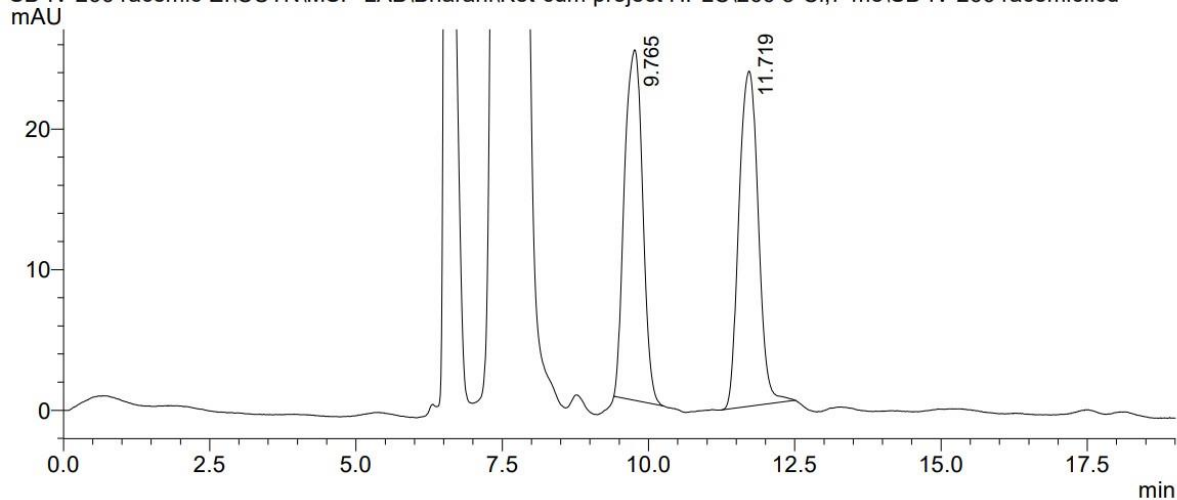

PDA Ch1 254nm

| Peak # | Ret. Time (min) | Area    | Height | Area%   |
|--------|-----------------|---------|--------|---------|
| 1      | 9.765           | 538319  | 24917  | 49.572  |
| 2      | 11.719          | 547608  | 23823  | 50.428  |
| Total  |                 | 1085928 | 48740  | 100.000 |

### HPLC of chiral **4d'**: 97:3 *er*

SB-IV-266 chiral E:\CUTN\MSP-LAB\Bharani\Ket-cum project HPLC\266 5-Cl,7-me\SB-IV-266 chiral.lcd

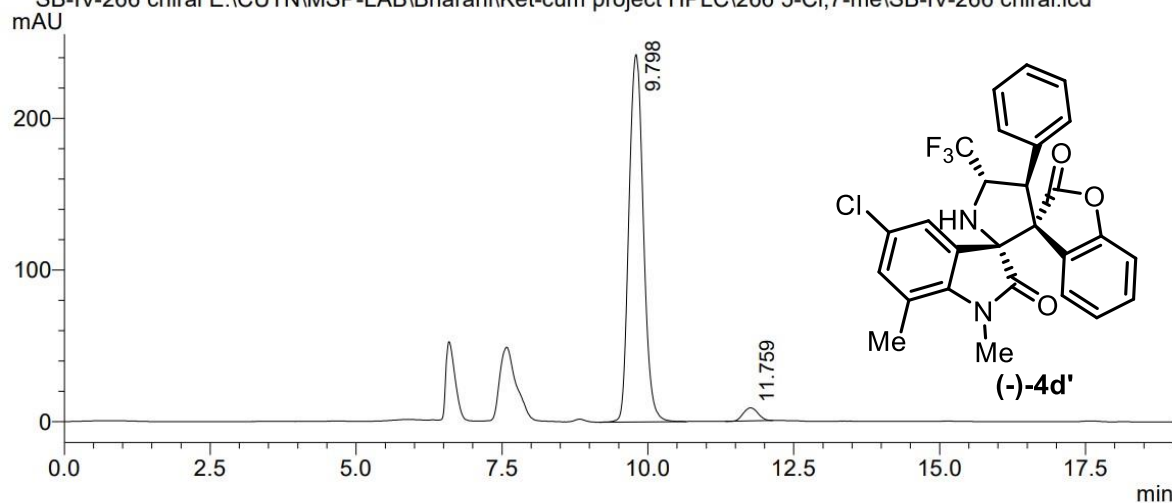

PDA Ch1 254nm

| Peak # | Ret. Time (min) | Area    | Height | Area%   |
|--------|-----------------|---------|--------|---------|
| 1      | 9.798           | 4163209 | 242328 | 96.522  |
| 2      | 11.759          | 150018  | 8583   | 3.478   |
| Total  |                 | 4313227 | 250910 | 100.000 |

### HPLC of racemic **4f'**

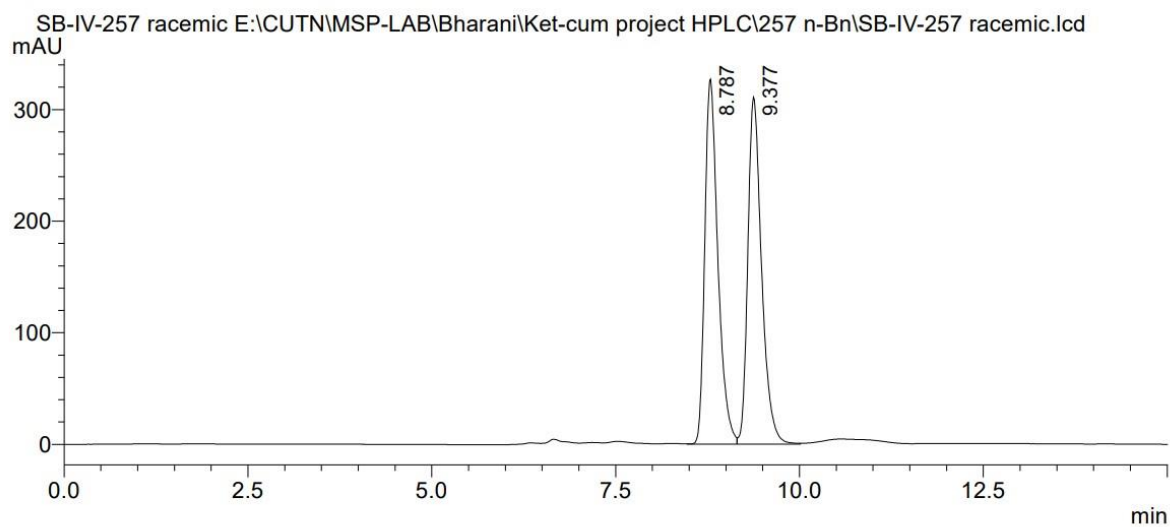

PDA Ch1 254nm

| Peak # | Ret. Time (min) | Area    | Height | Area%   |
|--------|-----------------|---------|--------|---------|
| 1      | 8.787           | 4064442 | 327083 | 50.043  |
| 2      | 9.377           | 4057536 | 310865 | 49.957  |
| Total  |                 | 8121978 | 637949 | 100.000 |

### HPLC of chiral **4f'**: **88:12 er**

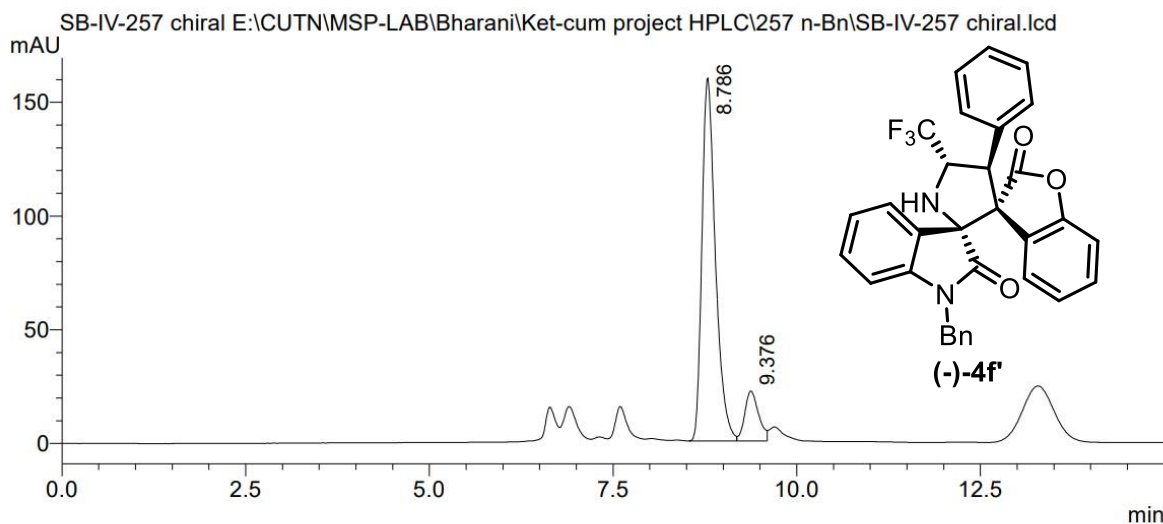

PDA Ch1 254nm

| Peak # | Ret. Time (min) | Area    | Height | Area%   |
|--------|-----------------|---------|--------|---------|
| 1      | 8.786           | 2039026 | 159481 | 87.576  |
| 2      | 9.376           | 289257  | 21985  | 12.424  |
| Total  |                 | 2328283 | 181466 | 100.000 |

## HPLC of racemic **4g'**

SB-IV-269 racemic T3 E:\CUTN\MSP-LAB\Bharani\Ket-cum project HPLC\269 4-Br,n-Bn\SB-IV-269 racemic T3.lcd

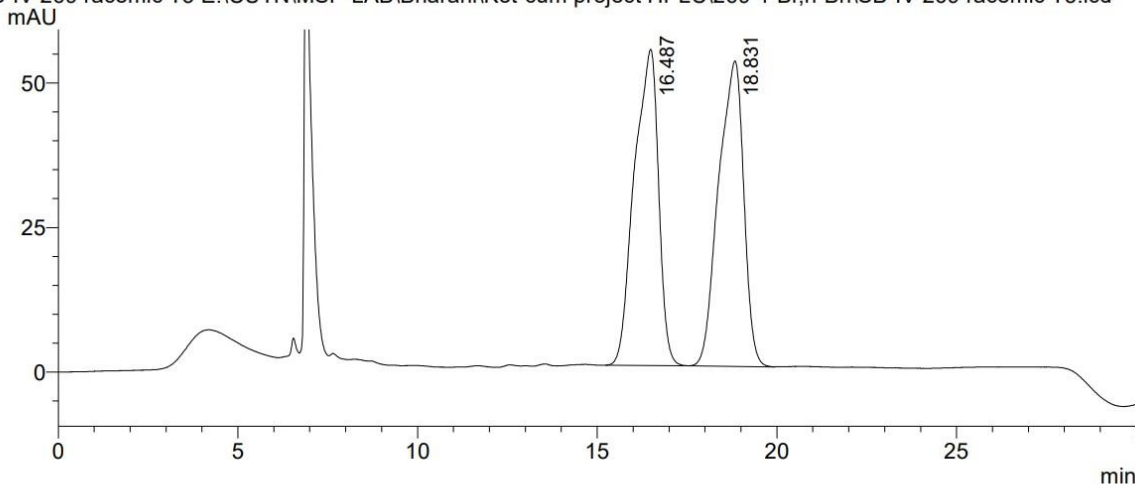

PDA Ch1 254nm

| Peak # | Ret. Time (min) | Area    | Height | Area%   |
|--------|-----------------|---------|--------|---------|
| 1      | 16.487          | 2553748 | 54650  | 49.858  |
| 2      | 18.831          | 2568305 | 52825  | 50.142  |
| Total  |                 | 5122053 | 107475 | 100.000 |

## HPLC of chiral **4g'**: 90:10 *er*

SB-IV-269 chiral lower T2 E:\CUTN\MSP-LAB\Bharani\Ket-cum project HPLC\269 4-Br,n-Bn\SB-IV-269 chiral T2.lcd

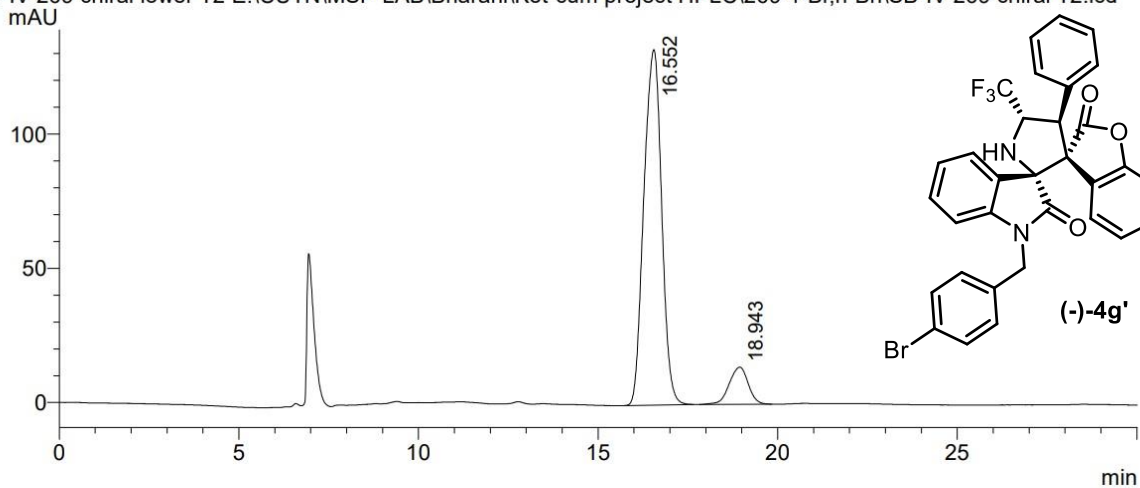

PDA Ch1 254nm

| Peak # | Ret. Time (min) | Area    | Height | Area%   |
|--------|-----------------|---------|--------|---------|
| 1      | 16.552          | 4557159 | 132392 | 89.965  |
| 2      | 18.943          | 508326  | 13813  | 10.035  |
| Total  |                 | 5065485 | 146206 | 100.000 |

## HPLC of racemic **4h'**

SB-IV-268 racemic E:\CUTN\MSP-LAB\Bharani\Ket-cum project HPLC\268 4-me,n-Bn\SB-IV-268 racemic.lcd

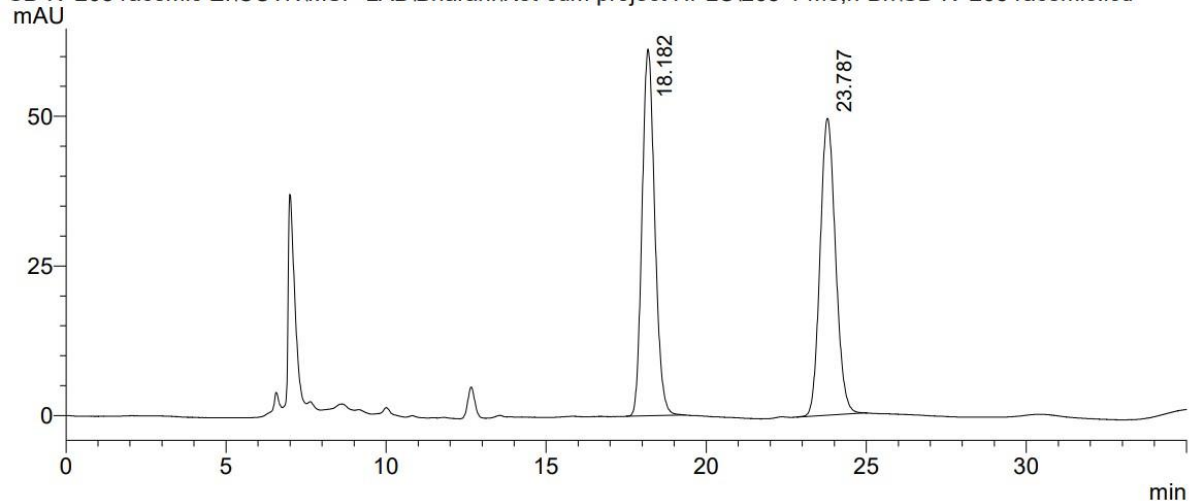

PDA Ch1 254nm

| Peak # | Ret. Time (min) | Area    | Height | Area%   |
|--------|-----------------|---------|--------|---------|
| 1      | 18.182          | 1690540 | 61241  | 50.365  |
| 2      | 23.787          | 1666058 | 49583  | 49.635  |
| Total  |                 | 3356598 | 110824 | 100.000 |

## HPLC of chiral **4h'**: **86:14 er**

SB-IV-268 chiral E:\CUTN\MSP-LAB\Bharani\Ket-cum project HPLC\268 4-me,n-Bn\SB-IV-268 chiral.lcd

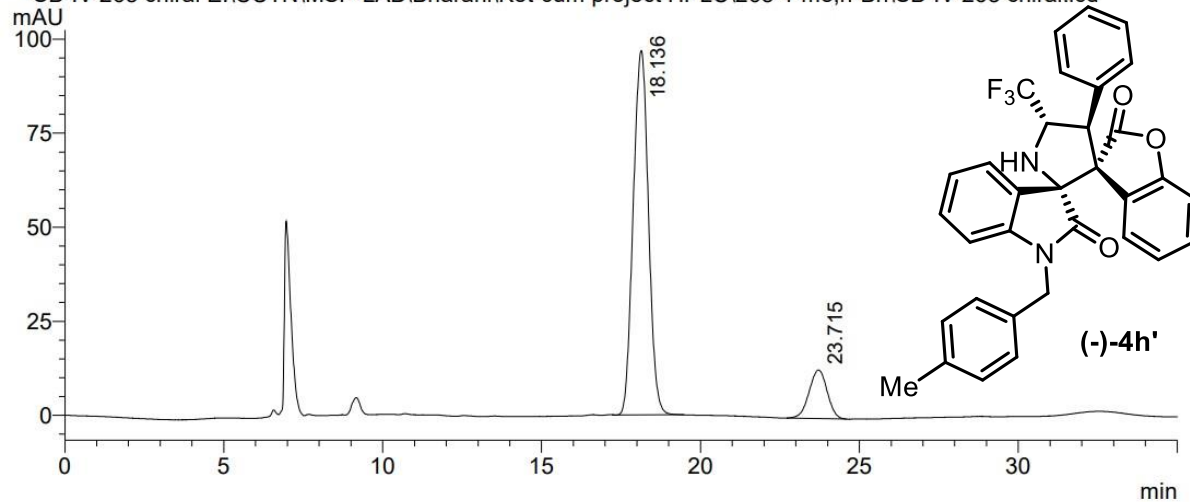

PDA Ch1 254nm

| Peak # | Ret. Time (min) | Area    | Height | Area%   |
|--------|-----------------|---------|--------|---------|
| 1      | 18.136          | 3233406 | 96811  | 86.314  |
| 2      | 23.715          | 512681  | 12956  | 13.686  |
| Total  |                 | 3746087 | 109768 | 100.000 |
